# Supplementary material for: The CLV3 Homolog in Setaria viridis Selectively Controls Inflorescence Meristem Size
Source: Front Plant Sci. 2021 Feb 15;12:636749. doi: 10.3389/fpls.2021.636749 (PMC7917188; doi:10.3389/fpls.2021.636749)
Supplement: Supplementary file 9 [file Table_2.XLSX]

## Sheet: FON2-network
TableS2 Sheet1: Expression of genes in the SvFon2(Sevir.8G183800) network with weight cutoff at 0.185, genes in Transcripts per Million (TPM) at six different stages of inflorescence development. Weight is a value quantifying the co-expression level of a gene pair generated by Weighted Gene Co-expression Network Analysis (WGCNA) in Zhu et al. (2018). For annotation, WikiGene.description and Inter…
				Mean expression value (TPM) at different stages of inflorescence development						Standard deviation of expression value (TPM) at different stages of inflorescence development						toNode gene annotation							Homologs in grasses
toNode	fromNode	weight	direction	10DAS	12DAS	14DAS	15DAS	16DAS	18DAS	10DAS_SD	12DAS_SD	14DAS_SD	15DAS_SD	16DAS_SD	18DAS_SD	WikiGene.description	InterPro.description	Best.hit.arabi.name	arabi.symbol	arabi.defline	Best.hit.rice.name	rice.defline	Maizev4.gene	Zmays_284.gene	Bradi.gene	Sobic.gene	Seita.gene
Sevir.1G231100	SvRs1	0.192747	undirected	5.57	9.86	14.26	13.35	16.44	13.03	0.35	0.82	1.27	0.37	1.14	1.29	LETM1 and EF-hand domain-containing protein 1, mitochondrial-like	EF-Hand 1, calcium-binding site;EF-hand-like domain;LETM1-like;Calcium-binding EF-hand	AT1G65540.1; AT1G65540.1	;	LETM1-like protein; LETM1-like protein	LOC_Os02g39550.1; LOC_Os02g39550.2	calcium-binding mitochondrial protein anon-60Da, putative, expressed; calcium-binding mitochondrial protein anon-60Da, putative, expressed	Zm00001d017166_T001; Zm00001d010109_T004	GRMZM2G145905_T01; GRMZM2G314656_T01	Bradi3g48350.2; Bradi2g26300.1	Sobic.004G209800.1; Sobic.009G158100.1	Seita.1G227400.1; Seita.3G222000.1
Sevir.2G006400	SvRs1	0.196348	undirected	28.81	136.25	256.2	212.4	271.59	167.12	5.84	24.71	33.37	28.54	23.44	20.91	MADS-box transcription factor 15-like	Transcription factor, K-box;Transcription factor, MADS-box	AT1G69120.1	AGL7,AP1	K-box region and MADS-box transcription factor family protein	LOC_Os07g01820.3	OsMADS15 - MADS-box family gene with MIKCc type-box, expressed	Zm00001d007949_T002; Zm00001d018667_T003	GRMZM2G072582_T02; GRMZM2G148693_T02	Bradi1g59250.1; Bradi1g08340.1	Sobic.002G010100.1; Sobic.001G314400.1	Seita.2G002300.1; Seita.9G088900.1
Sevir.2G015300	SvRs1	0.200764	undirected	0.02	0.31	1.65	1.64	1.69	0.91	0.02	0.12	0.39	0.35	0.65	0.21	F-box/FBD/LRR-repeat protein At1g16930-like	FBD domain;F-box domain, cyclin-like	AT5G02920.1		F-box/RNI-like superfamily protein	LOC_Os07g18510.1	OsFBLD5 - F-box, LRR and FBD domain containing protein, expressed	Zm00001d010644_T001	NA	NA	Sobic.002G336400.1; Sobic.002G336500.1	Seita.2G012300.1; Seita.2G087300.1
Sevir.2G067500	SvRs1	0.20501	undirected	3.97	16.75	28.97	34.19	40.29	28.75	0.6	2.4	2.92	4.74	4.55	3.42	uncharacterized LOC101760360	F-box domain, cyclin-like	AT2G16810.1		F-box and associated interaction domains-containing protein	LOC_Os07g35050.1	OsFBX237 - F-box domain containing protein, expressed	NA	NA	NA	Sobic.002G059866.1; Sobic.002G061500.1	Seita.2G064200.1; Seita.3G396800.1
Sevir.2G067800	SvRs1	0.201378	undirected	0.93	2.75	6.78	7.82	9.73	7.53	0.14	0.25	0.94	1.09	0.51	0.67		F-box domain, cyclin-like	AT5G07610.1		F-box family protein	LOC_Os07g35050.1	OsFBX237 - F-box domain containing protein, expressed	Zm00001d007686_T001; Zm00001d007793_T001	GRMZM2G152290_T01; GRMZM2G082964_T01	NA	Sobic.002G060500.2; Sobic.002G060000.1	Seita.2G064500.1; Seita.3G396800.1
Sevir.2G068800	SvRs1	0.18493	undirected	1.69	7.71	14.74	13.02	18.44	13.46	0.24	1.73	0.97	0.9	2	2.18		F-box associated domain, type 3;F-box domain, cyclin-like	AT5G49610.1		F-box family protein	LOC_Os07g35060.2	OsFBX238 - F-box domain containing protein, expressed	NA	NA	NA	Sobic.002G059600.1; Sobic.004G351932.1	Seita.2G065900.1; Seita.2G063900.1
Sevir.2G077100	SvRs1	0.198699	undirected	0.54	2.88	4.69	4.97	5.9	3.97	0.2	0.39	0.35	0.61	0.8	0.27	putative F-box protein At3g16210-like	Galactose oxidase/kelch, beta-propeller;F-box domain, cyclin-like	AT3G16210.1;	;	F-box family protein;	LOC_Os07g02890.1; LOC_Os07g02890.1	OsFBX209 - F-box domain containing protein, expressed; OsFBX209 - F-box domain containing protein, expressed	NA	NA	NA	Sobic.010G009250.1	Seita.2G074300.1
Sevir.2G222600	SvRs1	0.199719	undirected	1.77	3.09	10.56	8.91	12.77	8.55	0.21	0.98	1.15	1.61	2.15	1.49	zinc finger protein 2-like	Zinc finger, C2H2	AT5G57520.1	ATZFP2,ZFP2	zinc finger protein 2	LOC_Os09g26200.1	ZOS9-11 - C2H2 zinc finger protein, expressed	Zm00001d020573_T001; Zm00001d020574_T001	GRMZM2G166782_T01; GRMZM2G120794_T01	Bradi4g30910.1; Bradi2g58720.1	Sobic.002G209800.1; Sobic.001G357100.2	Seita.2G213500.1; Seita.8G082500.1
Sevir.2G437400	SvRs1	0.205902	undirected	76.55	120.89	144.7	151.67	159.27	124.51	8.95	7.19	24.6	24.35	12.28	4.33	NA	NA	AT5G57655.2		xylose isomerase family protein	LOC_Os07g47290.1	xylose isomerase, putative, expressed	Zm00001d022490_T001; Zm00001d022490_T003	GRMZM2G081682_T01; GRMZM2G005493_T01	Bradi1g18550.2	Sobic.002G409800.1	Seita.2G425200.1; Seita.2G358800.1
Sevir.5G017800	SvRs1	0.200923	undirected	1.19	3.36	10.72	9.04	12.13	5.35	0.46	0.46	1.8	2.16	4.94	1.83	uncharacterized LOC101770708	Proteinase inhibitor I9	AT2G19170.1	SLP3	subtilisin-like serine protease 3	LOC_Os01g12110.2	expressed protein	Zm00001d008956_T001	GRMZM2G096525_T01	Bradi2g07190.1	Sobic.003G015300.1	Seita.5G019100.1
Sevir.5G100000	SvRa3	0.193394	undirected	3.77	7.44	16.59	23.72	20.42	13.02	0.4	0.74	2.16	2.73	2.27	1.22	NA	NA				LOC_Os01g05460.1	expressed protein	NA	NA	NA	NA	Seita.5G102000.1; Seita.5G102200.1
Sevir.5G100000	SvRs1	0.188144	undirected	3.77	7.44	16.59	23.72	20.42	13.02	0.4	0.74	2.16	2.73	2.27	1.22	NA	NA				LOC_Os01g05460.1	expressed protein	NA	NA	NA	NA	Seita.5G102000.1; Seita.5G102200.1
Sevir.5G122200	SvRs1	0.186079	undirected	4.71	19.3	39.17	42.41	42.38	22.36	1.18	2.39	3.62	5.02	3.49	2.26	transcriptional corepressor LEUNIG-like	G-protein beta WD-40 repeat;WD40 repeat, conserved site;WD40-repeat-containing domain;LisH dimerisation motif;WD40 repeat;WD40/YVTN repeat-like-containing domain	AT4G32551.2	LUG,RON2	LisH dimerisation motif;WD40/YVTN repeat-like-containing domain	LOC_Os01g08190.2	transcriptional corepressor LEUNIG, putative, expressed	Zm00001d008742_T010; Zm00001d008742_T002	GRMZM5G883768_T01; GRMZM2G086401_T01	Bradi2g04820.1	Sobic.003G046400.5	Seita.5G125300.1
Sevir.5G133100	SvRs1	0.188488	undirected	4.45	8.22	11.64	13.84	13.82	9.01	0.84	0.32	1.9	1.24	1.47	0.47	hexokinase-8-like	Hexokinase, C-terminal;Hexokinase, N-terminal;Hexokinase	AT4G29130.1	ATHXK1,GIN2,HXK1	hexokinase 1	LOC_Os01g09460.1	hexokinase, putative, expressed	Zm00001d039512_T010; Zm00001d039512_T006	GRMZM2G104081_T01	Bradi2g05670.2	Sobic.003G035500.1	Seita.5G134800.1
Sevir.7G125200	SvRs1	0.211649	undirected	1.12	1.77	3.22	2.76	3.34	2.57	0.23	0.22	0.27	0.39	0.62	0.22	uncharacterized LOC101783168		AT4G37030.1			LOC_Os04g37670.1	steroid nuclear receptor, ligand-binding, putative, expressed	Zm00001d003508_T001	GRMZM2G015844_T01	Bradi5g11790.2	Sobic.006G098200.1	Seita.7G117100.1
Sevir.8G239900	SvRs1	0.193056	undirected	8.93	13.83	17.43	18.61	19.12	14.06	1.31	0.4	1.24	0.68	1.61	0.88	transmembrane protein 205-like	Domain of unknown function DUF4149	AT3G62580.1		Late embryogenesis abundant protein (LEA) family protein	LOC_Os11g44940.1	seed maturation protein PM27, putative, expressed	NA	NA	Bradi4g04850.1	Sobic.005G211200.1	Seita.8G229900.1; Seita.8G229700.1
Sevir.8G258800	SvRs1	0.198226	undirected	9.92	15.4	21.36	18.45	23.7	18.84	1.1	0.82	3.1	1.76	4.14	0.71	vacuolar protein sorting-associated protein 2 homolog 1-like	Snf7 family	AT2G06530.1	VPS2.1	SNF7 family protein	LOC_Os11g47710.1	SNF7 domain containing protein, putative, expressed	Zm00001d048616_T001; Zm00001d028738_T003	GRMZM2G047575_T01; GRMZM2G059233_T01	Bradi4g09340.1	Sobic.005G228000.1	Seita.8G248400.1
Sevir.9G031700	SvRs1	0.187326	undirected	15.55	24.03	29.65	29.55	34.57	29.53	0.92	1.55	2.94	1.77	2.73	1.5	protein kinase APK1B, chloroplastic-like	Protein kinase, ATP binding site;Protein kinase-like domain;Serine/threonine-protein kinase, active site;Serine-threonine/tyrosine-protein kinase catalytic domain;Protein kinase, catalytic domain;Concanavalin A-like lectin/glucanase, subgroup	AT2G28930.3; AT1G07570.3	APK1B,PK1B; APK1,APK1A	protein kinase 1B; Protein kinase superfamily protein	LOC_Os03g60710.1; LOC_Os03g60710.1	protein kinase domain containing protein, expressed; protein kinase domain containing protein, expressed	Zm00001d034662_T001; Zm00001d012958_T001	GRMZM2G068117_T01; GRMZM2G144042_T01	Bradi1g03650.1	Sobic.001G033400.1	Seita.9G032500.1
Sevir.9G087300	SvRs1	0.206464	undirected	39.19	134.97	176.29	177.08	189.4	167.61	5.09	23.18	19.05	19.15	29.82	24.32	NA	NA	AT1G69120.1	AGL7,AP1	K-box region and MADS-box transcription factor family protein	LOC_Os03g54160.2	OsMADS14 - MADS-box family gene with MIKCc type-box, expressed	Zm00001d034045_T004; Zm00001d013259_T003	GRMZM2G032339_T02; GRMZM2G553379_T07	Bradi1g08340.1; Bradi1g21980.2	Sobic.001G086500.1; Sobic.002G010100.1	Seita.9G088900.1; Seita.2G002300.1
Sevir.9G163100	SvRs1	0.198898	undirected	1.81	7.05	12.87	12.86	13.33	9.29	0.4	0.74	0.73	1.36	1.26	0.69	probable E3 ubiquitin-protein ligase ARI1-like	Zinc finger, C6HC-type;Zinc finger, RING-type;Zinc finger, RING/FYVE/PHD-type;E3 ubiquitin ligase RBR family	AT4G34370.1	ARI1,ATARI1	RING/U-box superfamily protein	LOC_Os03g42760.1	zinc finger protein-related, putative, expressed	Zm00001d013716_T002; Zm00001d013716_T007	GRMZM2G110423_T01	Bradi1g14430.1	Sobic.001G163300.1	Seita.9G165200.1
Sevir.9G507200	SvRa3	0.188134	undirected	1.55	7.67	24.07	32.14	30.56	14.93	0.26	0.54	3.83	8.37	3.94	3.93	uncharacterized LOC101786591	Protein of unknown function DUF4228	AT5G67620.1			LOC_Os03g10320.1	expressed protein	Zm00001d028118_T001; Zm00001d048162_T001	GRMZM2G140674_T01; GRMZM2G181540_T01	Bradi1g71210.1	Sobic.001G467500.1	Seita.9G502900.1; Seita.7G326400.1
Sevir.9G527000	SvRa3	0.198182	undirected	0.22	1.08	2.15	3.5	3.11	1.99	0.06	0.21	0.28	0.35	0.19	0.21						LOC_Os03g07720.1	expressed protein	NA	NA	NA	NA	Seita.9G522200.1
Sevir.9G527000	SvFea4	0.184967	undirected	0.22	1.08	2.15	3.5	3.11	1.99	0.06	0.21	0.28	0.35	0.19	0.21						LOC_Os03g07720.1	expressed protein	NA	NA	NA	NA	Seita.9G522200.1
Sevir.9G527000	SvFon2	0.189602	undirected	0.22	1.08	2.15	3.5	3.11	1.99	0.06	0.21	0.28	0.35	0.19	0.21						LOC_Os03g07720.1	expressed protein	NA	NA	NA	NA	Seita.9G522200.1
Sevir.9G527000	SvRs1	0.189149	undirected	0.22	1.08	2.15	3.5	3.11	1.99	0.06	0.21	0.28	0.35	0.19	0.21						LOC_Os03g07720.1	expressed protein	NA	NA	NA	NA	Seita.9G522200.1
Sevir.9G535300	SvRs1	0.20024	undirected	7.59	12.45	22.5	23.91	24.02	19.83	1.7	1.03	2.66	4.68	3.78	2.73	uncharacterized LOC101756762	Protein of unknown function DUF506, plant	AT2G38820.2		Protein of unknown function (DUF506)	LOC_Os03g06680.1	plant-specific domain TIGR01615 family protein, expressed	Zm00001d027763_T001; Zm00001d032955_T001	GRMZM2G136081_T01; GRMZM2G110681_T01	Bradi1g74270.1	Sobic.001G495600.1; Sobic.001G247400.1	Seita.9G531100.1; Seita.9G263700.1

## Sheet: FON2_edge_allgenes
TableS2 Sheet2: Expression of all genes directly associated with SvFon2 (Sevir.8G183800) in Transcripts per Million (TPM) at six different stages of inflorescence development. Genes were arranged by weight, a value quantifying the co-expression level of a gene pair generated by Weighted Gene Co-expression Network Analysis (WGCNA) in Zhu et al. (2018). For annotation, Short_name and Short_descript…
				Mean expression value (TPM) at different stages of inflorescence development						Standard deviation of expression value (TPM) at different stages of inflorescence development								toNode gene annotation							Homologs in grasses
toNode	fromNode	weight	direction	10DAS	12DAS	14DAS	15DAS	16DAS	18DAS	10DAS_SD	12DAS_SD	14DAS_SD	15DAS_SD	16DAS_SD	18DAS_SD	Homolog of	Short_description	WikiGene.description	InterPro.description	Best.hit.arabi.name	arabi.symbol	arabi.defline	Best.hit.rice.name	rice.defline	Maizev4.gene	Zmays_284.gene	Bradi.gene	Sobic.gene	Seita.gene
Sevir.9G527000	Sevir.8G183800	0.189602	undirected	0.22	1.08	2.15	3.5	3.11	1.99	0.06	0.21	0.28	0.35	0.19	0.21	NA	NA						LOC_Os03g07720.1	expressed protein	NA	NA	NA	NA	Seita.9G522200.1
Sevir.5G100000	Sevir.8G183800	0.179481	undirected	3.77	7.44	16.59	23.72	20.42	13.02	0.4	0.74	2.16	2.73	2.27	1.22	NA	NA	NA	NA				LOC_Os01g05460.1	expressed protein	NA	NA	NA	NA	Seita.5G102000.1; Seita.5G102200.1
Sevir.2G067500	Sevir.8G183800	0.174776	undirected	3.97	16.75	28.97	34.19	40.29	28.75	0.6	2.4	2.92	4.74	4.55	3.42	NA	NA	uncharacterized LOC101760360	F-box domain, cyclin-like	AT2G16810.1		F-box and associated interaction domains-containing protein	LOC_Os07g35050.1	OsFBX237 - F-box domain containing protein, expressed	NA	NA	NA	Sobic.002G059866.1; Sobic.002G061500.1	Seita.2G064200.1; Seita.3G396800.1
Sevir.5G133100	Sevir.8G183800	0.170417	undirected	4.45	8.22	11.64	13.84	13.82	9.01	0.84	0.32	1.9	1.24	1.47	0.47	NA	NA	hexokinase-8-like	Hexokinase, C-terminal;Hexokinase, N-terminal;Hexokinase	AT4G29130.1	ATHXK1,GIN2,HXK1	hexokinase 1	LOC_Os01g09460.1	hexokinase, putative, expressed	Zm00001d039512_T010; Zm00001d039512_T006	GRMZM2G104081_T01	Bradi2g05670.2	Sobic.003G035500.1	Seita.5G134800.1
Sevir.5G345000	Sevir.8G183800	0.164931	undirected	0.2	1.58	4.94	8.04	6.93	3.13	0.04	0.28	0.59	1.4	0.22	1.29	NA	NA	sphingosine kinase 2-like	ATP-NAD kinase-like domain;Diacylglycerol kinase, catalytic domain	AT4G21534.1		Diacylglycerol kinase family protein	LOC_Os01g57350.1	diacylglycerol kinase, putative, expressed	NA	NA	Bradi2g51820.2	Sobic.003G317400.1	Seita.5G340800.1
Sevir.9G507200	Sevir.8G183800	0.16335	undirected	1.55	7.67	24.07	32.14	30.56	14.93	0.26	0.54	3.83	8.37	3.94	3.93	NA	NA	uncharacterized LOC101786591	Protein of unknown function DUF4228	AT5G67620.1			LOC_Os03g10320.1	expressed protein	Zm00001d028118_T001; Zm00001d048162_T001	GRMZM2G140674_T01; GRMZM2G181540_T01	Bradi1g71210.1	Sobic.001G467500.1	Seita.9G502900.1; Seita.7G326400.1
Sevir.5G301700	Sevir.8G183800	0.161515	undirected	2.9	5.87	9.21	10.2	10.58	7.21	0.64	0.82	0.49	0.79	0.96	0.88	NA	NA	uncharacterized LOC101769234		AT1G80000.2; AT1G80000.1	;	CASC3/Barentsz eIF4AIII binding; CASC3/Barentsz eIF4AIII binding	LOC_Os01g52140.1; LOC_Os01g41190.1	expressed protein; glycine-rich protein, putative, expressed	NA	NA	NA	Sobic.003G278633.1	Seita.5G298900.1
Sevir.2G067800	Sevir.8G183800	0.159957	undirected	0.93	2.75	6.78	7.82	9.73	7.53	0.14	0.25	0.94	1.09	0.51	0.67	NA	NA		F-box domain, cyclin-like	AT5G07610.1		F-box family protein	LOC_Os07g35050.1	OsFBX237 - F-box domain containing protein, expressed	Zm00001d007686_T001; Zm00001d007793_T001	GRMZM2G152290_T01; GRMZM2G082964_T01	NA	Sobic.002G060500.2; Sobic.002G060000.1	Seita.2G064500.1; Seita.3G396800.1
Sevir.2G054000	Sevir.8G183800	0.159296	undirected	0.41	1.19	2.11	2.68	2.61	1.63	0.02	0.01	0.22	0.4	0.39	0.14	NA	NA	protein HAPLESS 2-A-like	Generative cell specific-1, HAP2-GCS1	AT4G11720.1	GCS1,HAP2	hapless 2	LOC_Os05g18730.1	generative cell specific-1, putative, expressed	Zm00001d006177_T039; Zm00001d006177_T008	GRMZM2G412911_T01	Bradi4g35730.2	Sobic.002G270600.1	Seita.2G049400.1
Sevir.5G122200	Sevir.8G183800	0.15913	undirected	4.71	19.3	39.17	42.41	42.38	22.36	1.18	2.39	3.62	5.02	3.49	2.26	NA	NA	transcriptional corepressor LEUNIG-like	G-protein beta WD-40 repeat;WD40 repeat, conserved site;WD40-repeat-containing domain;LisH dimerisation motif;WD40 repeat;WD40/YVTN repeat-like-containing domain	AT4G32551.2	LUG,RON2	LisH dimerisation motif;WD40/YVTN repeat-like-containing domain	LOC_Os01g08190.2	transcriptional corepressor LEUNIG, putative, expressed	Zm00001d008742_T010; Zm00001d008742_T002	GRMZM5G883768_T01; GRMZM2G086401_T01	Bradi2g04820.1	Sobic.003G046400.5	Seita.5G125300.1
Sevir.5G083500	Sevir.8G183800	0.158179	undirected	4.61	5.88	9.25	11.79	11.11	7.96	1.02	0.8	0.98	0.46	0.82	0.48	BX2	BENZOXAZINONE SYNTHESIS2	indole-2-monooxygenase-like	Cytochrome P450, conserved site;Cytochrome P450, E-class, group I;Cytochrome P450	AT3G48280.1; AT3G48310.1; AT3G48270.1	CYP71A25; CYP71A22; CYP71A26	cytochrome P450, family 71, subfamily A, polypeptide 25; cytochrome P450, family 71, subfamily A, polypeptide 22; cytochrome P450, family 71, subfamily A, polypeptide 26	LOC_Os08g01450.1; LOC_Os08g01450.1; LOC_Os08g01480.1	cytochrome P450, putative, expressed; cytochrome P450, putative, expressed; cytochrome P450, putative, expressed	NA	NA	Bradi1g02670.2	Sobic.003G089600.1; Sobic.007G003600.1	Seita.5G085000.1; Seita.5G084700.1
Sevir.2G029800	Sevir.8G183800	0.157762	undirected	80.28	142.61	258.73	303.88	312.93	242.41	18	20.93	27.77	51.21	44.52	26.48	HOMEOBOX/GN1;RS1	GNARLEY1;ROUGH SHEATH1	homeobox protein rough sheath 1-like	Homeobox, conserved site;Homeodomain-like;Homeobox KN domain;ELK domain;Homeobox domain	AT4G08150.1	BP,BP1,KNAT1	KNOTTED-like from Arabidopsis thaliana	LOC_Os07g03770.1	Homeobox domain containing protein, expressed	Zm00001d018742_T001; Zm00001d007842_T002	GRMZM2G028041_T01; GRMZM2G452178_T01	Bradi1g57607.1; Bradi1g07247.4	Sobic.002G023900.1; Sobic.001G075101.1	Seita.2G025300.1; Seita.9G074700.1
Sevir.2G077100	Sevir.8G183800	0.157022	undirected	0.54	2.88	4.69	4.97	5.9	3.97	0.2	0.39	0.35	0.61	0.8	0.27	NA	NA	putative F-box protein At3g16210-like	Galactose oxidase/kelch, beta-propeller;F-box domain, cyclin-like	AT3G16210.1;	;	F-box family protein;	LOC_Os07g02890.1; LOC_Os07g02890.1	OsFBX209 - F-box domain containing protein, expressed; OsFBX209 - F-box domain containing protein, expressed	NA	NA	NA	Sobic.010G009250.1	Seita.2G074300.1
Sevir.4G053800	Sevir.8G183800	0.156019	undirected	3.53	7.41	10.93	13.11	12.56	7.73	0.55	0.31	1.45	0.69	1.09	0.98	NA	NA	uncharacterized LOC101769737	Development/cell death domain	AT2G35140.3; AT2G35140.1	;	DCD (Development and Cell Death) domain protein; DCD (Development and Cell Death) domain protein	LOC_Os06g07770.1; LOC_Os06g07770.1	expressed protein; expressed protein	Zm00001d037482_T001	GRMZM2G082399_T01	NA	Sobic.010G058400.2	Seita.4G056300.1
Sevir.8G239900	Sevir.8G183800	0.154081	undirected	8.93	13.83	17.43	18.61	19.12	14.06	1.31	0.4	1.24	0.68	1.61	0.88	NA	NA	transmembrane protein 205-like	Domain of unknown function DUF4149	AT3G62580.1		Late embryogenesis abundant protein (LEA) family protein	LOC_Os11g44940.1	seed maturation protein PM27, putative, expressed	NA	NA	Bradi4g04850.1	Sobic.005G211200.1	Seita.8G229900.1; Seita.8G229700.1
Sevir.9G145200	Sevir.8G183800	0.152955	undirected	15.79	23.36	30.36	38.16	41.45	25.71	1.74	3.16	1.79	2.98	2.58	5.58	NA	NA	uncharacterized LOC101769216	Myb-like domain;Homeodomain-like	AT2G35640.1		Homeodomain-like superfamily protein	LOC_Os03g46350.1	transcription factor, putative, expressed	Zm00001d013588_T001; Zm00001d034953_T001	NA	Bradi1g12900.1	Sobic.001G143400.1	Seita.9G146700.1
Sevir.2G250900	Sevir.8G183800	0.148233	undirected	0.03	0.07	0.5	0.82	0.93	0.36	0.03	0.05	0.13	0.3	0.07	0.08	NA	NA	ABC transporter G family member 11-like	ABC transporter, conserved site;ABC-2 type transporter;AAA+ ATPase domain;ABC transporter-like;P-loop containing nucleoside triphosphate hydrolase	AT1G17840.1	ABCG11,ATWBC11,COF1,DSO,WBC11	white-brown complex homolog protein 11	LOC_Os09g29660.1	white-brown complex homolog protein 11, putative, expressed	Zm00001d020811_T001; Zm00001d048621_T001	GRMZM2G096952_T01; GRMZM2G308860_T01	Bradi4g32850.1; Bradi4g08130.1	Sobic.002G234400.1; Sobic.005G225800.2	Seita.2G240500.1; Seita.3G079600.1
Sevir.4G156900	Sevir.8G183800	0.146978	undirected	0.31	1.76	3.9	5.55	4.85	3.42	0.19	0.23	0.21	0.88	0.87	0.33	NA	NA	NA	NA				LOC_Os11g33260.1	retrotransposon protein, putative, unclassified, expressed	NA	NA	NA	NA	Seita.2G124800.1; Seita.4G188700.1
Sevir.1G231100	Sevir.8G183800	0.140328	undirected	5.57	9.86	14.26	13.35	16.44	13.03	0.35	0.82	1.27	0.37	1.14	1.29	NA	NA	LETM1 and EF-hand domain-containing protein 1, mitochondrial-like	EF-Hand 1, calcium-binding site;EF-hand-like domain;LETM1-like;Calcium-binding EF-hand	AT1G65540.1; AT1G65540.1	;	LETM1-like protein; LETM1-like protein	LOC_Os02g39550.1; LOC_Os02g39550.2	calcium-binding mitochondrial protein anon-60Da, putative, expressed; calcium-binding mitochondrial protein anon-60Da, putative, expressed	Zm00001d017166_T001; Zm00001d010109_T004	GRMZM2G145905_T01; GRMZM2G314656_T01	Bradi3g48350.2; Bradi2g26300.1	Sobic.004G209800.1; Sobic.009G158100.1	Seita.1G227400.1; Seita.3G222000.1
Sevir.9G031700	Sevir.8G183800	0.139575	undirected	15.55	24.03	29.65	29.55	34.57	29.53	0.92	1.55	2.94	1.77	2.73	1.5	NA	NA	protein kinase APK1B, chloroplastic-like	Protein kinase, ATP binding site;Protein kinase-like domain;Serine/threonine-protein kinase, active site;Serine-threonine/tyrosine-protein kinase catalytic domain;Protein kinase, catalytic domain;Concanavalin A-like lectin/glucanase, subgroup	AT2G28930.3; AT1G07570.3	APK1B,PK1B; APK1,APK1A	protein kinase 1B; Protein kinase superfamily protein	LOC_Os03g60710.1; LOC_Os03g60710.1	protein kinase domain containing protein, expressed; protein kinase domain containing protein, expressed	Zm00001d034662_T001; Zm00001d012958_T001	GRMZM2G068117_T01; GRMZM2G144042_T01	Bradi1g03650.1	Sobic.001G033400.1	Seita.9G032500.1
Sevir.9G163100	Sevir.8G183800	0.138679	undirected	1.81	7.05	12.87	12.86	13.33	9.29	0.4	0.74	0.73	1.36	1.26	0.69	NA	NA	probable E3 ubiquitin-protein ligase ARI1-like	Zinc finger, C6HC-type;Zinc finger, RING-type;Zinc finger, RING/FYVE/PHD-type;E3 ubiquitin ligase RBR family	AT4G34370.1	ARI1,ATARI1	RING/U-box superfamily protein	LOC_Os03g42760.1	zinc finger protein-related, putative, expressed	Zm00001d013716_T002; Zm00001d013716_T007	GRMZM2G110423_T01	Bradi1g14430.1	Sobic.001G163300.1	Seita.9G165200.1
Sevir.9G039000	Sevir.8G183800	0.13621	undirected	1.97	3.14	4.79	5.94	6.2	4.19	0.35	0.1	0.81	0.71	0.88	0.47	NA	NA	probable cadmium/zinc-transporting ATPase HMA1, chloroplastic-like	Cation-transporting P-type ATPase, subfamily IB;P-type ATPase, cytoplasmic domain N;HAD-like domain;P-type ATPase, phosphorylation site;P-type ATPase, A domain;Cation-transporting P-type ATPase;P-type ATPase, transmembrane domain	AT4G37270.1	ATHMA1,HMA1	heavy metal atpase 1	LOC_Os06g47550.1	cadmium/zinc-transporting ATPase, putative, expressed	Zm00001d014569_T002; Zm00001d014569_T001	GRMZM2G067853_T01; GRMZM2G031416_T01	Bradi1g33347.1	Sobic.010G240500.2	Seita.4G253000.1; Seita.9G039700.1
Sevir.1G111300	Sevir.8G183800	0.135502	undirected	2.91	7.04	11.31	11.15	16.29	12.15	0.37	0.15	1.99	1.54	2.04	1.87	NA	NA	NA	NA	;	;	;	LOC_Os02g02910.1; LOC_Os02g02910.3	expressed protein; expressed protein	Zm00001d053911_T001; Zm00001d053911_T002	GRMZM2G042664_T01	NA	Sobic.004G018700.1	Seita.1G109000.1
Sevir.6G018300	Sevir.8G183800	0.131642	undirected	2.47	16.08	29.94	25.61	36.03	25.14	0.47	0.69	2.34	4.02	1.08	1.44	NA	NA	F-box/FBD/LRR-repeat protein At1g16930-like	FBD domain;F-box domain, cyclin-like	AT1G13570.1; AT1G13570.1	;	F-box/RNI-like superfamily protein; F-box/RNI-like superfamily protein	LOC_Os04g13150.1; LOC_Os04g13160.1	OsFBX125 - F-box domain containing protein, expressed; OsFBD9 - F-box and FBD domain containing protein, expressed	NA	NA	Bradi1g21087.2; Bradi4g25670.3	Sobic.008G094800.1; Sobic.006G234500.1	Seita.6G019800.1; Seita.7G038800.1
Sevir.2G407500	Sevir.8G183800	0.130906	undirected	1.62	15.88	126.84	149.07	184.1	27.54	0.37	4.04	26.45	26.83	26.77	11.15	RA3	RAMOSA3	probable trehalose-phosphate phosphatase 3-like	HAD-like domain;HAD-superfamily hydrolase, subfamily IIB;Trehalose-phosphatase	AT1G35910.1		Haloacid dehalogenase-like hydrolase (HAD) superfamily protein	LOC_Os07g43160.1	uncharacterized glycosyl hydrolase Rv2006/MT2062, putative, expressed	Zm00001d022193_T003; Zm00001d022193_T002	GRMZM2G014729_T01; GRMZM2G117564_T01	Bradi1g60950.1; Bradi1g21420.1	Sobic.002G381600.1; Sobic.002G381500.1	Seita.2G396100.1; Seita.2G396200.1
Sevir.6G032100	Sevir.8G183800	0.130527	undirected	2.62	7.53	11.49	10.63	15.49	10.98	0.45	0.64	1.55	0.84	0.99	1.23	NA	NA	putative F-box/LRR-repeat protein 23-like	F-box domain, cyclin-like	AT4G05460.1		RNI-like superfamily protein	LOC_Os08g09450.1	OsFBL41 - F-box domain and LRR containing protein, expressed	NA	NA	Bradi3g17410.2; Bradi3g17590.1	Sobic.007G070300.1; Sobic.007G070500.1	Seita.6G033800.1; Seita.8G245800.1
Sevir.2G006400	Sevir.8G183800	0.12934	undirected	28.81	136.25	256.2	212.4	271.59	167.12	5.84	24.71	33.37	28.54	23.44	20.91	MADS	ZEA APETALA HOMOLOG1	MADS-box transcription factor 15-like	Transcription factor, K-box;Transcription factor, MADS-box	AT1G69120.1	AGL7,AP1	K-box region and MADS-box transcription factor family protein	LOC_Os07g01820.3	OsMADS15 - MADS-box family gene with MIKCc type-box, expressed	Zm00001d007949_T002; Zm00001d018667_T003	GRMZM2G072582_T02; GRMZM2G148693_T02	Bradi1g59250.1; Bradi1g08340.1	Sobic.002G010100.1; Sobic.001G314400.1	Seita.2G002300.1; Seita.9G088900.1
Sevir.2G068800	Sevir.8G183800	0.12262	undirected	1.69	7.71	14.74	13.02	18.44	13.46	0.24	1.73	0.97	0.9	2	2.18	NA	NA		F-box associated domain, type 3;F-box domain, cyclin-like	AT5G49610.1		F-box family protein	LOC_Os07g35060.2	OsFBX238 - F-box domain containing protein, expressed	NA	NA	NA	Sobic.002G059600.1; Sobic.004G351932.1	Seita.2G065900.1; Seita.2G063900.1
Sevir.4G162600	Sevir.8G183800	0.117545	undirected	0.85	3.11	4.06	5.22	4.91	3.04	0.24	0.45	0.55	0.83	0.39	0.14	NA	NA	uncharacterized LOC101772142		AT1G10710.2; AT1G10710.1	PHS1; PHS1	poor homologous synapsis 1; poor homologous synapsis 1	LOC_Os06g27860.1; LOC_Os06g27860.1	poor homologous synapsis 1 protein, putative, expressed; poor homologous synapsis 1 protein, putative, expressed	Zm00001d045993_T003; Zm00001d045993_T002	GRMZM2G100103_T01	NA	Sobic.010G140400.1	Seita.4G149400.1
Sevir.6G162300	Sevir.8G183800	0.115493	undirected	2.88	5.58	9.54	8.21	11.68	9.38	0.71	0.39	1.05	0.45	0.23	1.2	EMS1	NA		Leucine-rich repeat-containing N-terminal, type 2;Protein kinase-like domain;Serine/threonine-protein kinase, active site;Leucine-rich repeat, typical subtype;Serine/threonine- / dual specificity protein kinase, catalytic domain;Leucine-rich repeat;Serine-threonine/tyrosine-protein kinase catalytic domain;Protein kinase, catalytic domain;Concanavalin A-like lectin/glucanase, subgroup	AT5G07280.1	EMS1,EXS	Leucine-rich repeat transmembrane protein kinase	LOC_Os01g68870.2	leucine-rich repeat receptor protein kinase EXS precursor, putative, expressed	Zm00001d042362_T007; Zm00001d042362_T001	GRMZM2G447447_T01; GRMZM2G306771_T01	Bradi2g58780.4; Bradi3g06980.5	Sobic.003G402100.3	Seita.6G156200.1; Seita.5G428100.1
Sevir.5G474100	Sevir.8G183800	0.115389	undirected	4.42	5.26	8.81	11.4	10.98	5.93	0.29	0.71	0.68	1.63	1.3	0.77	NA	NA	uncharacterized LOC101764498	Streptomyces cyclase/dehydrase;START-like domain	AT4G01650.1		Polyketide cyclase / dehydrase and lipid transport protein	LOC_Os01g74010.2	cyclase/dehydrase family protein, expressed	Zm00001d041961_T001	NA	NA	Sobic.003G443500.1	Seita.5G468000.1
Sevir.5G307700	Sevir.8G183800	0.113839	undirected	74.61	125.81	165.44	164.27	174.77	123.06	8.71	2.61	15.88	29.02	5.86	8.83	NA	NA	SNF1-related protein kinase catalytic subunit alpha KIN10-like	Protein kinase, ATP binding site;Ubiquitin-associated/translation elongation factor EF1B, N-terminal, eukaryote;Protein kinase-like domain;Serine/threonine-protein kinase, active site;Serine/threonine- / dual specificity protein kinase, catalytic domain;Kinase associated domain 1 (KA1);Protein kinase, catalytic domain;KA1 domain/Ssp2 C-terminal domain	AT3G01090.2	AKIN10,KIN10,SNRK1.1	SNF1 kinase homolog 10	LOC_Os05g45420.1	CAMK_KIN1/SNF1/Nim1_like_AMPKh.3 - CAMK includes calcium/calmodulin depedent protein kinases, expressed	Zm00001d005108_T003; Zm00001d005108_T008	GRMZM2G180704_T01; GRMZM2G077278_T01	Bradi2g48830.1; Bradi2g18970.3	Sobic.003G284000.2; Sobic.009G208100.1	Seita.5G305000.1; Seita.3G168800.1
Sevir.2G222600	Sevir.8G183800	0.111605	undirected	1.77	3.09	10.56	8.91	12.77	8.55	0.21	0.98	1.15	1.61	2.15	1.49	NA	NA	zinc finger protein 2-like	Zinc finger, C2H2	AT5G57520.1	ATZFP2,ZFP2	zinc finger protein 2	LOC_Os09g26200.1	ZOS9-11 - C2H2 zinc finger protein, expressed	Zm00001d020573_T001; Zm00001d020574_T001	GRMZM2G166782_T01; GRMZM2G120794_T01	Bradi4g30910.1; Bradi2g58720.1	Sobic.002G209800.1; Sobic.001G357100.2	Seita.2G213500.1; Seita.8G082500.1
Sevir.9G259200	Sevir.8G183800	0.111505	undirected	0.08	4.42	11.79	11.75	10.47	4.52	0.1	0.59	0.5	1.46	1.83	0.88	NA	NA		Aldehyde/histidinol dehydrogenase;Aldehyde dehydrogenase, conserved site;Aldehyde dehydrogenase domain;Aldehyde dehydrogenase, N-terminal;Aldehyde dehydrogenase, C-terminal;Aldehyde dehydrogenase, glutamic acid active site	AT3G24503.1	ALDH1A,ALDH2C4,REF1	aldehyde dehydrogenase 2C4	LOC_Os01g40870.1	aldehyde dehydrogenase, putative, expressed	Zm00001d011259_T001; Zm00001d044340_T001	GRMZM2G097706_T03; GRMZM2G407949_T01	Bradi2g42380.2	Sobic.003G203600.1; Sobic.003G203500.1	Seita.9G256900.1; Seita.5G210300.1
Sevir.3G381500	Sevir.8G183800	0.11109	undirected	6.31	10	15.2	13.41	16.52	9.51	1.26	1.12	1.07	0.57	1.21	1.18	NA	NA	uncharacterized LOC101756865	Protein of unknown function DUF863, plant	AT1G13940.1		Plant protein of unknown function (DUF863)	LOC_Os12g38870.2	expressed protein	Zm00001d030784_T002; Zm00001d030784_T009	GRMZM2G002138_T01	NA	Sobic.008G141400.1	Seita.3G364400.1
Sevir.2G437400	Sevir.8G183800	0.106007	undirected	76.55	120.89	144.7	151.67	159.27	124.51	8.95	7.19	24.6	24.35	12.28	4.33	NA	NA	NA	NA	AT5G57655.2		xylose isomerase family protein	LOC_Os07g47290.1	xylose isomerase, putative, expressed	Zm00001d022490_T001; Zm00001d022490_T003	GRMZM2G081682_T01; GRMZM2G005493_T01	Bradi1g18550.2	Sobic.002G409800.1	Seita.2G425200.1; Seita.2G358800.1
Sevir.9G535300	Sevir.8G183800	0.105731	undirected	7.59	12.45	22.5	23.91	24.02	19.83	1.7	1.03	2.66	4.68	3.78	2.73	NA	NA	uncharacterized LOC101756762	Protein of unknown function DUF506, plant	AT2G38820.2		Protein of unknown function (DUF506)	LOC_Os03g06680.1	plant-specific domain TIGR01615 family protein, expressed	Zm00001d027763_T001; Zm00001d032955_T001	GRMZM2G136081_T01; GRMZM2G110681_T01	Bradi1g74270.1	Sobic.001G495600.1; Sobic.001G247400.1	Seita.9G531100.1; Seita.9G263700.1
Sevir.9G138400	Sevir.8G183800	0.103667	undirected	20.94	54.59	69.78	82.16	70.1	45.76	3.65	6	5.3	10.47	8.19	1.27	NA	NA	tankyrase-1-like	Ankyrin repeat-containing domain;Tetratricopeptide repeat;Tetratricopeptide TPR2;Tetratricopeptide repeat-containing domain;Ankyrin repeat;Tetratricopeptide-like helical	AT3G04710.2		ankyrin repeat family protein	LOC_Os03g47650.1	ankyrin, putative, expressed	NA	NA	NA	NA	Seita.9G140000.1
Sevir.3G241600	Sevir.8G183800	0.09871	undirected	22.73	37.03	57.77	47.54	69.71	52.69	3.28	2.51	6.22	7.42	4.83	4.3	NA	NA	uncharacterized LOC101753367	Domain of unknown function DUF630;Domain of unknown function DUF632	AT1G21740.1		Protein of unknown function (DUF630 and DUF632)	LOC_Os05g35070.1	DUF630/DUF632 domains containing protein, putative, expressed	Zm00001d038223_T001	GRMZM2G456512_T01	NA	Sobic.009G143200.1	Seita.3G236300.1
Sevir.9G462700	Sevir.8G183800	0.0976	undirected	4.07	5.67	10.71	10.86	11.95	7.27	1.28	0.51	0.59	2.7	0.44	1.36	NA	NA	protein DA1-related 2-like	Protein of unknown function DUF3633;Ubiquitin interacting motif;Zinc finger, LIM-type	AT2G39830.1	DAR2	DA1-related protein 2	LOC_Os03g16090.1	LIM domain-containing protein, putative, expressed	Zm00001d047837_T001; Zm00001d047837_T002	GRMZM2G151934_T01; GRMZM2G160198_T01	Bradi1g66980.2	Sobic.001G425100.1	Seita.9G459200.1; Seita.8G110500.1
Sevir.7G125200	Sevir.8G183800	0.0972595	undirected	1.12	1.77	3.22	2.76	3.34	2.57	0.23	0.22	0.27	0.39	0.62	0.22	NA	NA	uncharacterized LOC101783168		AT4G37030.1			LOC_Os04g37670.1	steroid nuclear receptor, ligand-binding, putative, expressed	Zm00001d003508_T001	GRMZM2G015844_T01	Bradi5g11790.2	Sobic.006G098200.1	Seita.7G117100.1
Sevir.5G462100	Sevir.8G183800	0.0965327	undirected	9.54	14.23	18.02	20.64	19.89	10.78	0.58	1.02	1.05	1.36	0.68	0.7	NA	NA	uncharacterized LOC101785274	Amidohydrolase 3;Metal-dependent hydrolase, composite domain;Metal-dependent hydrolase	AT3G55850.1	LAF3,LAF3 ISF1,LAF3 ISF2	Amidohydrolase family	LOC_Os01g72350.1	amidohydrolase, putative, expressed	Zm00001d042064_T010; Zm00001d042064_T008	GRMZM2G310069_T01	Bradi2g61017.2	Sobic.003G428600.1	Seita.5G455500.1
Sevir.2G029100	Sevir.8G183800	0.091524	undirected	9.03	14.52	22.45	17.82	22.76	16.28	1.19	1.18	1.31	2.31	1.84	0.95	NA	NA	putative xyloglucan glycosyltransferase 10-like	Nucleotide-diphospho-sugar transferases	AT4G07960.1	ATCSLC12,CSLC12	Cellulose-synthase-like C12	LOC_Os07g03260.1	CSLC10 - cellulose synthase-like family C, expressed	Zm00001d034205_T001; Zm00001d013168_T001	GRMZM2G028286_T01; AC183932.3_FGT007	Bradi1g57552.1; Bradi1g07277.1	Sobic.002G022700.1; Sobic.001G075600.1	Seita.2G024400.1; Seita.9G075000.1
Sevir.6G032000	Sevir.8G183800	0.0895332	undirected	0.46	3.17	6.39	7.19	6.66	6.1	0.21	0.73	0.42	0.94	1.07	0.59	NA	NA		F-box domain, cyclin-like	AT4G05460.1		RNI-like superfamily protein	LOC_Os08g09450.1	OsFBL41 - F-box domain and LRR containing protein, expressed	NA	NA	Bradi3g17270.1; Bradi3g17260.3	Sobic.007G070500.1; Sobic.007G070900.2	Seita.6G033700.1; Seita.6G033800.1
Sevir.1G292900	Sevir.8G183800	0.0887208	undirected	48.78	62.9	83.94	75.15	98.37	85.58	2.73	0.93	8.24	5.53	4.39	10.16	NA	NA	rop guanine nucleotide exchange factor 1-like	Plant specific Rop nucleotide exchanger, PRONE	AT1G31650.1; AT1G31650.1; AT1G31650.1	ATROPGEF14,ROPGEF14; ATROPGEF14,ROPGEF14; ATROPGEF14,ROPGEF14	RHO guanyl-nucleotide exchange factor 14; RHO guanyl-nucleotide exchange factor 14; RHO guanyl-nucleotide exchange factor 14	LOC_Os02g47420.3; LOC_Os02g47420.2; LOC_Os02g47420.1	ATROPGEF7/ROPGEF7, putative, expressed; ATROPGEF7/ROPGEF7, putative, expressed; ATROPGEF7/ROPGEF7, putative, expressed	Zm00001d017755_T006; Zm00001d017755_T001	GRMZM2G147780_T01; GRMZM2G092749_T02	Bradi3g52620.5	Sobic.004G269100.4	Seita.1G287800.1; Seita.5G061700.1
Sevir.5G161100	Sevir.8G183800	0.088631	undirected	1.27	1.8	3.01	3.49	3.16	1.83	0.23	0.11	0.23	0.47	0.56	0.15	NA	NA	dual specificity protein phosphatase PHS1-like	Dual specificity phosphatase, subgroup, catalytic domain;Protein-tyrosine phosphatase, active site;Actin-fragmin kinase, catalytic domain;Protein kinase-like domain;Phosphatidylinositol 3-/4-kinase, catalytic domain;Protein-tyrosine/Dual specificity phosphatase;Dual specificity phosphatase, catalytic domain;Dual specificity phosphatase;Protein-tyrosine phosphatase-like	AT5G23720.1; AT5G23720.3	PHS1; PHS1	dual specificity protein phosphatase family protein; dual specificity protein phosphatase family protein	LOC_Os01g24470.1; LOC_Os01g24470.1	PHS1, putative, expressed; PHS1, putative, expressed	Zm00001d009183_T008; Zm00001d009183_T009	GRMZM2G061684_T01; AC212775.1_FGT004	Bradi2g12627.2	Sobic.003G158000.1	Seita.5G161300.1
Sevir.9G087300	Sevir.8G183800	0.0884457	undirected	39.19	134.97	176.29	177.08	189.4	167.61	5.09	23.18	19.05	19.15	29.82	24.32	NA	NA	NA	NA	AT1G69120.1	AGL7,AP1	K-box region and MADS-box transcription factor family protein	LOC_Os03g54160.2	OsMADS14 - MADS-box family gene with MIKCc type-box, expressed	Zm00001d034045_T004; Zm00001d013259_T003	GRMZM2G032339_T02; GRMZM2G553379_T07	Bradi1g08340.1; Bradi1g21980.2	Sobic.001G086500.1; Sobic.002G010100.1	Seita.9G088900.1; Seita.2G002300.1
Sevir.3G381200	Sevir.8G183800	0.0882023	undirected	1.84	3.02	3.57	4.78	4.26	1.93	0.19	0.22	0.43	0.4	0.34	0.18	NA	NA		Actin-binding FH2;Tensin phosphatase, C2 domain;C2 calcium-dependent membrane targeting;Protein-tyrosine phosphatase-like	AT5G07740.1		actin binding	LOC_Os04g17130.1	retrotransposon protein, putative, unclassified, expressed	Zm00001d041515_T003; Zm00001d041515_T005	GRMZM2G410951_T01; GRMZM2G398731_T01	Bradi4g03720.3	Sobic.008G141100.1	Seita.3G364100.1
Sevir.7G233300	Sevir.8G183800	0.0878739	undirected	0.55	2.44	5.55	5.22	6.83	6.31	0.12	0.42	0.54	1.33	0.73	0.38	NA	NA		DNA-binding WRKY	AT2G34830.1	AtWRKY35,MEE24,WRKY35	WRKY DNA-binding protein 35	LOC_Os04g50920.1	WRKY37, expressed	Zm00001d002452_T001; Zm00001d026218_T001	GRMZM2G024898_T01; AC208110.2_FGT001	Bradi5g20290.2; Bradi1g01058.2	Sobic.006G201000.1	Seita.7G221700.1; Seita.1G284000.1
Sevir.4G119100	Sevir.8G183800	0.0867245	undirected	5.17	11.41	23.66	24.32	25.8	14.79	1.37	1.81	3.01	9.03	2.86	4.06	FEA4	FASCIATED EAR4		DOG1 domain;Basic-leucine zipper domain	AT1G68640.1	PAN	bZIP transcription factor family protein	LOC_Os06g15480.1	transcription factor, putative, expressed	Zm00001d037317_T003; Zm00001d037317_T002	GRMZM2G133331_T01; GRMZM5G873083_T01	Bradi1g43900.2	Sobic.010G110100.2	Seita.4G118000.1
Sevir.5G017800	Sevir.8G183800	0.0861383	undirected	1.19	3.36	10.72	9.04	12.13	5.35	0.46	0.46	1.8	2.16	4.94	1.83	NA	NA	uncharacterized LOC101770708	Proteinase inhibitor I9	AT2G19170.1	SLP3	subtilisin-like serine protease 3	LOC_Os01g12110.2	expressed protein	Zm00001d008956_T001	GRMZM2G096525_T01	Bradi2g07190.1	Sobic.003G015300.1	Seita.5G019100.1
Sevir.8G258800	Sevir.8G183800	0.0850866	undirected	9.92	15.4	21.36	18.45	23.7	18.84	1.1	0.82	3.1	1.76	4.14	0.71	NA	NA	vacuolar protein sorting-associated protein 2 homolog 1-like	Snf7 family	AT2G06530.1	VPS2.1	SNF7 family protein	LOC_Os11g47710.1	SNF7 domain containing protein, putative, expressed	Zm00001d048616_T001; Zm00001d028738_T003	GRMZM2G047575_T01; GRMZM2G059233_T01	Bradi4g09340.1	Sobic.005G228000.1	Seita.8G248400.1
Sevir.2G198000	Sevir.8G183800	0.0847646	undirected	8.4	12.19	19.1	21.1	17.73	10.97	1.6	0.77	1.87	2.1	1.15	0.87	NA	NA	putative F-box protein At5g52610-like	F-box associated interaction domain;F-box associated domain, type 3;Galactose oxidase/kelch, beta-propeller;F-box domain, cyclin-like	AT5G52610.1		F-box and associated interaction domains-containing protein	LOC_Os09g20650.1	OsFBX323 - F-box domain containing protein, expressed	Zm00001d020303_T001	GRMZM2G049364_T01	NA	Sobic.002G186400.4	Seita.2G190400.1
Sevir.1G165600	Sevir.8G183800	0.084276	undirected	0.33	2.93	5.45	6.07	5.44	4.91	0.12	0.41	1.1	0.47	0.53	0.96	NA	NA		Ankyrin repeat-containing domain;Ankyrin repeat	AT3G04710.3		ankyrin repeat family protein	LOC_Os02g29130.2	ankyrin, putative, expressed	NA	NA	NA	Sobic.004G148600.1	NA
Sevir.7G201500	Sevir.8G183800	0.0842291	undirected	0.89	3.01	5.63	5.48	5.53	2.46	0.2	0.23	1.31	1.42	0.93	0.78	NA	NA	uncharacterized LOC101764532	Uncharacterised conserved protein UCP012943	AT4G25170.1; AT4G25170.1	;	Uncharacterised conserved protein (UCP012943); Uncharacterised conserved protein (UCP012943)	LOC_Os04g46480.1; LOC_Os04g46480.2	expressed protein; expressed protein	NA	NA	NA	Sobic.006G170400.1	Seita.7G189400.1
Sevir.7G300800	Sevir.8G183800	0.0828117	undirected	8.33	12.33	19.48	26.77	30.8	10.33	1.92	4.06	4.23	5.89	2.1	1.62	NA	NA	NA	NA	AT5G10770.1		Eukaryotic aspartyl protease family protein	LOC_Os02g48860.1	aspartic proteinase nepenthesin-2 precursor, putative, expressed	NA	NA	NA	NA	NA
Sevir.2G018500	Sevir.8G183800	0.0813028	undirected	0.04	3.17	9.76	5.68	9.9	5.63	0.07	0.76	1.85	0.53	1.13	0.49	NA	NA		FBD domain;F-box domain, cyclin-like	AT3G49030.1		FBD, F-box and Leucine Rich Repeat domains containing protein	LOC_Os07g02760.2	OsFBD13 - F-box and FBD domain containing protein, expressed	NA	NA	Bradi1g58780.3	Sobic.002G014900.1; Sobic.002G016600.1	Seita.2G014100.1; Seita.2G064000.1
Sevir.9G122200	Sevir.8G183800	0.0809144	undirected	3.52	20.05	40.1	26.15	38.53	25.38	1.54	2.14	5.33	3.62	5.29	5.58	TB1	TEOSINTE BRANCHED1	transcription factor TEOSINTE BRANCHED 1-like	CYC/TB1, R domain;Transcription factor TCP subgroup;Transcription factor, TCP	AT3G18550.2	ATTCP18,BRC1,TCP18	TCP family transcription factor	LOC_Os03g49880.1	TCP family transcription factor, putative, expressed	Zm00001d033673_T001; Zm00001d013467_T001	AC233950.1_FGT002; AC190734.2_FGT003	Bradi1g11060.1	Sobic.001G121600.1	Seita.9G123400.1; Seita.2G202000.1
Sevir.2G069400	Sevir.8G183800	0.0760448	undirected	0.61	2.14	3.56	2.87	3.87	3.38	0.26	0.24	0.27	0.61	0.7	0.33	NA	NA	protein argonaute MEL1-like	Domain of unknown function DUF1785;Ribonuclease H-like domain;Stem cell self-renewal protein Piwi;Argonaute/Dicer protein, PAZ;Argonaute linker 2 domain;Protein argonaute, Mid domain;Protein argonaute, N-terminal	AT2G27880.1	AGO5	Argonaute family protein	LOC_Os03g58600.1	PAZ domain containing protein, putative, expressed	Zm00001d007786_T001; Zm00001d005045_T001	GRMZM2G059033_T01; GRMZM2G067547_T01	Bradi1g54977.1; Bradi3g51077.3	Sobic.002G061800.2	Seita.2G066500.1
Sevir.9G581100	Sevir.8G183800	0.0749941	undirected	23.77	34.84	44.51	51.66	49.86	30.74	3.34	1.17	5.26	12.18	4.17	2.19	NA	NA	uncharacterized LOC101781619	P-loop containing nucleoside triphosphate hydrolase	AT5G61450.1		P-loop containing nucleoside triphosphate hydrolases superfamily protein	LOC_Os07g28260.1	expressed protein	Zm00001d048545_T001; Zm00001d048545_T007	GRMZM5G891969_T02	Bradi1g78370.1	Sobic.001G542300.1	Seita.9G577500.1
Sevir.9G259100	Sevir.8G183800	0.0739236	undirected	0.22	3.8	7.98	7.87	6.98	4.36	0.18	0.25	1.68	1.66	1.03	2.15	NA	NA		Transferase;Chloramphenicol acetyltransferase-like domain	AT5G39080.1		HXXXD-type acyl-transferase family protein	LOC_Os10g26290.1	transferase family protein, putative, expressed	NA	NA	NA	NA	Seita.9G256800.1
Sevir.2G018300	Sevir.8G183800	0.0734941	undirected	0.66	2.24	3.62	3.16	3.44	2.88	0.23	0.39	0.17	0.3	0.54	0.35	NA	NA	uncharacterized LOC101757359		AT1G76870.1			LOC_Os02g33770.1	homeodomain, putative, expressed	Zm00001d050698_T001; Zm00001d016755_T001	GRMZM2G469873_T01; GRMZM2G037823_T01	Bradi3g45300.1; Bradi4g41830.5	Sobic.004G170700.1	Seita.2G014000.1; Seita.1G186900.1
Sevir.2G068300	Sevir.8G183800	0.0731289	undirected	0.75	3.93	7.89	5.34	8.87	6.34	0.41	0.2	1.24	1.08	0.95	0.83	NA	NA		F-box domain, cyclin-like	AT1G31080.1		F-box family protein	LOC_Os07g35050.1	OsFBX237 - F-box domain containing protein, expressed	NA	NA	NA	Sobic.002G060400.2; Sobic.002G060500.2	Seita.2G065000.1; Seita.3G396800.1
Sevir.9G138300	Sevir.8G183800	0.0729245	undirected	2.66	23.55	40.2	28.6	35.55	28.55	0.66	1.86	5.55	5.42	3.31	3.54	NA	NA		Ankyrin repeat-containing domain;Tetratricopeptide repeat;Tetratricopeptide repeat-containing domain;Ankyrin repeat;Tetratricopeptide TPR-1;Tetratricopeptide-like helical	AT3G04710.2		ankyrin repeat family protein	LOC_Os03g47650.1	ankyrin, putative, expressed	Zm00001d033380_T001	GRMZM2G163796_T01	NA	Sobic.001G137800.1	Seita.9G139900.1
Sevir.6G250800	Sevir.8G183800	0.0725201	undirected	4.15	11.13	25.04	15.74	29.03	20.71	0.52	2.35	1.82	2.95	1.03	2.01	NA	NA	uncharacterized LOC101770755	Domain of unknown function DUF1618				LOC_Os01g38880.1	expressed protein	NA	NA	NA	NA	Seita.6G245100.1; Seita.6G245500.1
Sevir.9G316900	Sevir.8G183800	0.0720247	undirected	0.75	1.2	2.36	1.86	2.54	1.19	0.09	0.14	0.36	0.17	0.61	0.22	NA	NA		Peptidase C19, ubiquitin carboxyl-terminal hydrolase 2, conserved site;Peptidase C19, ubiquitin carboxyl-terminal hydrolase 2;Ubiquitin carboxyl-terminal hydrolase-like domain	AT5G57990.1; AT5G57990.1	UBP23; UBP23	ubiquitin-specific protease 23; ubiquitin-specific protease 23	LOC_Os02g55180.1; LOC_Os06g08530.1	ubiquitin carboxyl-terminal hydrolase domain containing protein, expressed; ubiquitin carboxyl-terminal hydrolase domain containing protein, expressed	Zm00001d047023_T001	GRMZM2G447056_T01	NA	Sobic.001G287900.6	Seita.9G310900.1
Sevir.6G153800	Sevir.8G183800	0.0713504	undirected	1.06	3.57	6.24	6.81	5.71	4.6	0.13	0.57	1.92	1.15	0.6	0.42	NA	NA	NA	NA				LOC_Os11g42610.1	transposon protein, putative, CACTA, En/Spm sub-class, expressed	NA	NA	NA	NA	Seita.6G147900.1
Sevir.9G273500	Sevir.8G183800	0.0705743	undirected	5.75	7.84	9.11	11.87	10.26	9.36	0.38	0.27	0.58	2.23	0.98	0.72	NA	NA	NAC domain-containing protein 7-like	No apical meristem (NAM) protein	AT5G04410.1	anac078,NAC2	NAC domain containing protein 2	LOC_Os10g21560.1	no apical meristem protein, putative, expressed	NA	NA	NA	NA	Seita.9G272700.1
Sevir.7G234100	Sevir.8G183800	0.0700756	undirected	0.25	1	1.95	2.45	2.51	0.55	0.13	0.14	0.09	1.13	0.28	0.33	NA	NA	wall-associated receptor kinase 3-like	Wall-associated receptor kinase galacturonan-binding domain;EGF-like calcium-binding, conserved site;Protein kinase, ATP binding site;Wall-associated kinase;Protein kinase-like domain;Serine/threonine-protein kinase, active site;Serine/threonine- / dual specificity protein kinase, catalytic domain;EGF-like calcium-binding;Epidermal growth factor-like domain;Protein kinase, catalytic domain;EGF-ty…	AT1G21270.1	WAK2	wall-associated kinase 2	LOC_Os04g51050.1	OsWAK53b - OsWAK receptor-like protein kinase, expressed	Zm00001d002446_T001	GRMZM2G176225_T01	Bradi5g20380.1	Sobic.001G150200.1	Seita.7G222400.1
Sevir.2G015300	Sevir.8G183800	0.0700182	undirected	0.02	0.31	1.65	1.64	1.69	0.91	0.02	0.12	0.39	0.35	0.65	0.21	NA	NA	F-box/FBD/LRR-repeat protein At1g16930-like	FBD domain;F-box domain, cyclin-like	AT5G02920.1		F-box/RNI-like superfamily protein	LOC_Os07g18510.1	OsFBLD5 - F-box, LRR and FBD domain containing protein, expressed	Zm00001d010644_T001	NA	NA	Sobic.002G336400.1; Sobic.002G336500.1	Seita.2G012300.1; Seita.2G087300.1
Sevir.3G070200	Sevir.8G183800	0.0694489	undirected	10.01	36.71	67.85	57.99	62.09	33.64	3.6	2.91	9.02	20.5	2	7.76	NA	NA		WAT1-related protein	AT1G68170.1		nodulin MtN21 /EamA-like transporter family protein	ChrSy.fgenesh.mRNA.32	expressed protein	NA	NA	NA	NA	Seita.3G068700.1
Sevir.3G225700	Sevir.8G183800	0.0693455	undirected	44.51	100.15	147.44	103.25	151.6	78.59	11	11.19	15.93	16.45	6.54	9.6	NA	NA	BEL1-like homeodomain protein 9-like	Homeodomain-like;Homeobox KN domain;POX domain;Homeobox domain	AT5G02030.1	BLH9,BLR,HB-6,LSN,PNY,RPL,VAN	POX (plant homeobox) family protein	LOC_Os05g38120.1	homeodomain protein, putative, expressed	Zm00001d038355_T001; Zm00001d010060_T001	GRMZM2G125976_T01; GRMZM2G074645_T01	Bradi2g23530.1; Bradi2g54940.1	Sobic.009G159900.1; Sobic.003G356200.1	Seita.3G220700.1
Sevir.5G432200	Sevir.8G183800	0.0691588	undirected	1.19	1.7	3.22	3.8	3.35	1.34	0.22	0.33	0.99	0.55	0.33	0.11	NA	NA	probable UDP-N-acetylglucosamine--peptide N-acetylglucosaminyltransferase SEC-like	Tetratricopeptide repeat;Tetratricopeptide repeat-containing domain;Tetratricopeptide-like helical;O-GlcNAc transferase, C-terminal	AT3G04240.1	SEC	Tetratricopeptide repeat (TPR)-like superfamily protein	LOC_Os01g68680.1	tetratricopeptide repeat domain containing protein, expressed	NA	NA	Bradi2g58616.1	NA	Seita.5G426400.1
Sevir.6G044700	Sevir.8G183800	0.066429	undirected	0.46	2.6	3.72	2.48	3.74	1.98	0.15	0.15	0.7	0.27	0.59	0.35	NA	NA	DNA-directed RNA polymerase D subunit 2a-like	RNA polymerase Rpb2, domain 5;RNA polymerase Rpb2, domain 4;RNA polymerase Rpb2, domain 3;RNA polymerase, beta subunit, protrusion;RNA polymerase Rpb2, domain 2;RNA polymerase Rpb2, domain 7;RNA polymerase, beta subunit, conserved site;DNA-directed RNA polymerase, subunit 2, domain 6;DNA-directed RNA polymerase, subunit 2;RNA polymerase Rpb2, OB-fold	AT3G23780.1; AT3G23780.2	DMS2,DRD2,NRPD2,NRPD2A,NRPE2; DMS2,DRD2,NRPD2,NRPD2A,NRPE2	nuclear RNA polymerase D2A; nuclear RNA polymerase D2A	LOC_Os08g07480.1; LOC_Os08g07480.1	DNA-directed RNA polymerase subunit, putative, expressed; DNA-directed RNA polymerase subunit, putative, expressed	Zm00001d024470_T001; Zm00001d024470_T003	GRMZM2G133512_T01	Bradi3g15852.1	Sobic.007G056900.1	Seita.6G047400.1; Seita.7G258200.1
Sevir.2G209300	Sevir.8G183800	0.0660009	undirected	4.02	8.53	11.5	9.49	10.38	6.63	0.34	1.16	0.84	0.5	0.68	0.54	NA	NA		Domain of unknown function SprT-like				LOC_Os09g24210.1	expressed protein	Zm00001d020420_T001	GRMZM2G362131_T01	NA	Sobic.002G197200.1	Seita.2G201200.1
Sevir.7G141700	Sevir.8G183800	0.0658262	undirected	12.1	19.16	26.76	22.24	27.22	22.9	2.24	2.22	2.17	3.06	2.64	1.42	NA	NA	probable WRKY transcription factor 34-like	DNA-binding WRKY	AT5G56270.1	ATWRKY2,WRKY2	WRKY DNA-binding protein 2	LOC_Os04g39570.1	WRKY35, expressed	Zm00001d003331_T001; Zm00001d003331_T002	GRMZM5G816457_T01; GRMZM2G031963_T01	Bradi5g13090.2; Bradi3g39340.2	Sobic.006G115700.1; Sobic.003G341100.1	Seita.7G133100.1; Seita.5G365500.1
Sevir.8G171300	Sevir.8G183800	0.0657777	undirected	1.22	3.46	4.42	3.22	5.09	3.83	0.15	0.16	0.5	0.35	0.32	0.34	NA	NA	uncharacterized LOC101766063	Domain of unknown function DUF3444;DnaJ domain	AT5G18750.1		DNAJ heat shock N-terminal domain-containing protein	LOC_Os01g27740.2	dnaJ domain containing protein, expressed	NA	NA	NA	Sobic.005G163500.2; Sobic.005G163400.3	Seita.8G160300.1; Seita.7G282100.1
Sevir.8G183900	Sevir.8G183800	0.0649103	undirected	0.35	1.09	1.68	1.75	1.53	0.81	0.08	0.14	0.12	0.52	0.12	0.28	NA	NA		Domain of unknown function DUF629;Tetratricopeptide-like helical	AT3G47890.1; AT3G47890.1	;	Ubiquitin carboxyl-terminal hydrolase-related protein; Ubiquitin carboxyl-terminal hydrolase-related protein	LOC_Os11g38330.1; LOC_Os11g34690.1	ZOS11-06 - C2H2 zinc finger protein, expressed; expressed protein	NA	NA	NA	Sobic.005G172700.1	Seita.8G174700.1
Sevir.8G061700	Sevir.8G183800	0.0640278	undirected	0.12	0.5	0.77	0.6	0.71	0.35	0.06	0.05	0.02	0.07	0.16	0.05	NA	NA	NA	NA						NA	NA	NA	NA	NA
Sevir.1G309300	Sevir.8G183800	0.0631353	undirected	3.19	10.63	21.74	13.82	25.18	16.06	1.47	1.68	6.21	2.79	2.05	5.21	NA	NA			AT5G60850.1	OBP4	OBF binding protein 4	LOC_Os02g49440.1	dof zinc finger domain containing protein, putative, expressed	Zm00001d017900_T001; Zm00001d051700_T001	GRMZM2G394941_T01; GRMZM2G449950_T01	Bradi3g56380.1; Bradi5g18640.1	Sobic.004G254000.1; Sobic.001G179300.1	Seita.1G303300.1; Seita.1G290700.1
Sevir.5G305800	Sevir.8G183800	0.062571	undirected	95.12	520.35	1219.44	1039.27	984.45	1031.06	19.65	88.49	128.5	194.02	36.92	108.77	NA	NA	MADS-box transcription factor 32-like	Transcription factor, K-box;Transcription factor, MADS-box	AT4G09960.2	AGL11,STK	K-box region and MADS-box transcription factor family protein	LOC_Os01g52680.1	OsMADS32 - MADS-box family gene with MIKCc type-box, expressed	Zm00001d011748_T001; Zm00001d043589_T006	GRMZM2G001139_T01; GRMZM2G079727_T01	Bradi2g48690.1	Sobic.003G282400.1	Seita.5G303200.1
Sevir.4G132700	Sevir.8G183800	0.0621726	undirected	14.68	23.88	30.37	24.34	32.57	29.52	1.31	1.24	0.3	1.73	1.58	0.95	NA	NA	uncharacterized LOC101785647		AT5G41620.1			LOC_Os06g31190.1	intracellular protein transport protein USO1-related, putative, expressed	Zm00001d037050_T002; Zm00001d037050_T001	GRMZM2G038623_T01; GRMZM2G419645_T01	Bradi1g39247.2	Sobic.010G149600.2	Seita.4G164600.1; Seita.1G012000.1
Sevir.5G251100	Sevir.8G183800	0.0621489	undirected	4.81	12.99	22.63	20.16	24.7	15.67	0.39	1.29	3.32	7.07	5.59	4.69	SPI1	SPARSE INFLORESCENCE1	probable indole-3-pyruvate monooxygenase YUCCA4-like	Pyridine nucleotide-disulphide oxidoreductase, FAD/NAD(P)-binding domain;Flavin monooxygenase-like;Dimethylaniline monooxygenase, N-oxide-forming;Pyridine nucleotide-disulphide oxidoreductase, class-II	AT5G11320.1	YUC4	Flavin-binding monooxygenase family protein	LOC_Os01g45760.1	YUC4, putative, expressed	Zm00001d044069_T001	GRMZM2G025222_T01	Bradi2g45105.2	Sobic.003G236900.3; Sobic.007G163200.1	Seita.5G243100.1; Seita.3G352600.1
Sevir.3G337100	Sevir.8G183800	0.0621046	undirected	26.73	38.55	45.8	39.1	54.66	38.5	3.99	4.68	4.65	5.6	3.99	4.12	NA	NA	lysine histidine transporter-like 8-like	Amino acid transporter, transmembrane	AT1G47670.1		Transmembrane amino acid transporter family protein	LOC_Os12g30040.1	transmembrane amino acid transporter protein, putative, expressed	Zm00001d041004_T003; Zm00001d041004_T002	GRMZM2G125832_T01; GRMZM2G360519_T01	Bradi4g07290.2	Sobic.008G097700.1	Seita.3G323900.1
Sevir.8G172600	Sevir.8G183800	0.0612679	undirected	0.67	3.26	4.59	3.39	4	2.45	0.19	0.24	0.86	0.32	0.15	0.2	NA	NA	pumilio homolog 3-like	Armadillo-type fold;Pumilio RNA-binding repeat;Armadillo-like helical	AT5G56510.1	APUM12,PUM12	pumilio 12	LOC_Os11g37090.1	pumilio-family RNA binding repeat domain containing protein, expressed	Zm00001d052953_T002; Zm00001d052953_T001	GRMZM2G049623_T01	NA	Sobic.005G164800.1	Seita.8G161800.1
Sevir.3G208200	Sevir.8G183800	0.0602212	undirected	1.91	1.63	4.23	4.66	4.42	1.5	0.35	0.21	0.77	0.53	0.22	0.14	NA	NA			AT3G08710.1	ATH9,TH9,TRX H9	thioredoxin H-type 9	LOC_Os05g40190.1	thioredoxin, putative, expressed	Zm00001d038486_T002; Zm00001d038486_T001	GRMZM2G701204_T01	NA	Sobic.009G174800.1	Seita.3G203100.1
Sevir.1G072000	Sevir.8G183800	0.0586472	undirected	2.94	4.38	5.86	4.75	6.9	6.06	0.31	0.52	0.38	0.3	0.61	0.37	NA	NA	uncharacterized LOC101758145	Protein of unknown function DUF3615	; AT2G35330.1	;	; RING/U-box superfamily protein	LOC_Os03g49126.1; LOC_Os03g49126.1	expressed protein; expressed protein	NA	NA	NA	NA	Seita.1G073300.1; Seita.1G072800.1
Sevir.5G249500	Sevir.8G183800	0.0581833	undirected	3.11	8	16.44	15.61	16.24	18.34	0.89	1.22	2.7	2.14	0.95	2.56	NA	NA	probable auxin efflux carrier component 3a-like	Auxin efflux carrier, plant type;Auxin efflux carrier	AT2G01420.2	ATPIN4,PIN4	Auxin efflux carrier family protein	LOC_Os01g45550.2	auxin efflux carrier component, putative, expressed	Zm00001d044083_T005; Zm00001d044083_T001	GRMZM2G126260_T02; GRMZM2G160496_T01	Bradi2g44987.1; Bradi3g59520.1	Sobic.003G235800.1; Sobic.010G095100.1	Seita.5G241500.1; Seita.3G136000.1
Sevir.5G326400	Sevir.8G183800	0.057955	undirected	3.65	16.17	27.7	24.1	27.07	30.1	0.72	1.55	1.97	4.96	3.16	2.52	NA	NA			AT2G42370.1			LOC_Os01g55120.1	expressed protein	NA	NA	NA	NA	Seita.5G322700.1
Sevir.7G277300	Sevir.8G183800	0.0578923	undirected	4.26	17.51	26.69	20.53	23.33	21.76	0.65	1.94	3.75	1.7	2.07	2.99	NA	NA	myosin heavy chain, clone 203-like	Zinc finger-XS domain;XS domain;Uncharacterised domain XH	AT1G15910.1		XH/XS domain-containing protein	LOC_Os05g06130.1	transcription factor X1, putative, expressed	Zm00001d010841_T001	NA	NA	Sobic.009G048300.2	Seita.7G266100.1
Sevir.2G015200	Sevir.8G183800	0.0576887	undirected	0	0.31	1.24	1.3	1.06	0.27	0	0.14	0.25	0.45	0.47	0.15	NA	NA		F-box domain, cyclin-like	AT3G03360.1		F-box/RNI-like superfamily protein	LOC_Os07g18560.1	OsFBLD6 - F-box, LRR and FBD domain containing protein, expressed	Zm00001d010644_T001	NA	NA	Sobic.002G336400.1; Sobic.002G336500.1	Seita.2G012100.1; Seita.2G087300.1
Sevir.2G021100	Sevir.8G183800	0.0569306	undirected	0.38	2.58	4.37	4.27	3.82	3.43	0.11	0.14	1.29	0.87	0.22	0.34	NA	NA	uncharacterized LOC101762650	F-box domain, cyclin-like				LOC_Os07g02910.1	OsFBL33 - F-box domain and LRR containing protein, expressed	NA	NA	Bradi1g58864.3; Bradi3g00670.3	Sobic.002G019300.2; Sobic.006G276801.1	Seita.2G016000.1; Seita.2G016100.1
Sevir.9G175300	Sevir.8G183800	0.056093	undirected	1.39	3.09	4.44	3.69	5.02	2.71	0.46	0.32	0.63	1.31	0.67	0.15	NA	NA	ent-isokaurene C2-hydroxylase-like	Cytochrome P450, conserved site;Cytochrome P450, E-class, group I;Cytochrome P450	AT1G13080.1	CYP71B2	cytochrome P450, family 71, subfamily B, polypeptide 2	LOC_Os03g39650.1	cytochrome P450, putative, expressed	Zm00001d033139_T001; Zm00001d033152_T001	GRMZM2G120621_T01; GRMZM2G171118_T01	NA	Sobic.001G176400.1; Sobic.001G173100.1	Seita.9G176800.1; Seita.9G176600.1
Sevir.3G204500	Sevir.8G183800	0.0548892	undirected	4.61	7.97	12.69	11.67	10.04	8.14	0.3	0.68	1.58	1.77	1.01	0.65	NA	NA		Zinc finger, PHD-type;BRCT domain;BRCA1-associated	AT1G04020.1	ATBARD1,BARD1,ROW1	breast cancer associated RING 1	LOC_Os04g43300.1	BRCA1 C Terminus domain containing protein, expressed	NA	NA	NA	Sobic.009G177600.1	Seita.3G199900.1
Sevir.5G386500	Sevir.8G183800	0.0545166	undirected	38.91	70.26	115.67	75.63	110.36	61.84	6.99	6.06	17.44	10.67	9.06	10.24	NA	NA	BEL1-like homeodomain protein 9-like	Homeodomain-like;Homeobox KN domain;POX domain;Homeobox domain	AT2G27990.1	BLH8,PNF	BEL1-like homeodomain 8	LOC_Os01g62920.1	homeodomain protein, putative, expressed	Zm00001d042864_T002; Zm00001d042864_T003	GRMZM2G154641_T01; GRMZM2G074645_T01	Bradi2g54940.1	Sobic.003G356200.1; Sobic.009G159900.1	Seita.5G381300.1
Sevir.1G062800	Sevir.8G183800	0.0544882	undirected	4.3	5.37	6.34	8.85	8.81	5.52	1.24	1.04	1.04	2.29	0.47	0.54	NA	NA	ADIPOR-like receptor CG5315-like	Hly-III-related	AT2G24150.1	HHP3	heptahelical protein 3	LOC_Os06g44250.1	haemolysin-III, putative, expressed	Zm00001d053739_T001; Zm00001d053739_T003	GRMZM2G363982_T01; GRMZM2G143460_T01	Bradi3g05940.1; Bradi1g31050.1	Sobic.004G064800.1; Sobic.010G212000.1	Seita.1G063600.1; Seita.4G194200.1
Sevir.2G184200	Sevir.8G183800	0.0543929	undirected	4.97	12.7	17.19	10.93	19.54	9.63	1.27	0.5	3.51	1.21	1.31	1.19	HSL1	NA	receptor-like protein kinase HSL1-like	Leucine-rich repeat-containing N-terminal, type 2;Protein kinase-like domain;Serine/threonine-protein kinase, active site;Leucine-rich repeat, typical subtype;Serine/threonine- / dual specificity protein kinase, catalytic domain;Leucine-rich repeat;Protein kinase, catalytic domain	AT1G28440.1	HSL1	HAESA-like 1	LOC_Os09g15700.1	receptor-like protein kinase 5 precursor, putative, expressed	Zm00001d020101_T001	GRMZM2G110685_T01	Bradi4g28107.1	Sobic.002G172200.1; Sobic.002G172100.1	Seita.2G177600.1; Seita.8G071500.1
Sevir.8G023100	Sevir.8G183800	0.0541783	undirected	0.14	1.36	2.76	1.71	2.18	1.09	0.07	0.38	0.2	0.06	0.51	0.25	NA	NA		Major facilitator superfamily domain;Major facilitator superfamily;Sugar transporter, conserved site	AT5G13750.2	ZIFL1	zinc induced facilitator-like 1	LOC_Os12g03830.1	major facilitator superfamily antiporter, putative, expressed	NA	NA	Bradi4g43580.2	NA	Seita.8G020500.1; Seita.7G312000.1
Sevir.4G124400	Sevir.8G183800	0.0538787	undirected	22.78	75.31	101.14	92.55	108.21	62.07	5.91	2.16	9.56	39.48	16.16	14.4	NA	NA	protein CUP-SHAPED COTYLEDON 2-like	No apical meristem (NAM) protein	AT5G53950.1;	ANAC098,ATCUC2,CUC2;	NAC (No Apical Meristem) domain transcriptional regulator superfamily protein;	LOC_Os06g23650.1; LOC_Os06g23650.1	no apical meristem protein, putative, expressed; no apical meristem protein, putative, expressed	Zm00001d035266_T001; Zm00001d041791_T001	GRMZM2G393433_T02; GRMZM2G139700_T01	Bradi1g41712.2; Bradi3g17287.1	Sobic.008G071400.1; Sobic.007G209200.1	Seita.4G157500.1; Seita.6G206400.1
Sevir.2G105700	Sevir.8G183800	0.0534703	undirected	6.71	13.41	17.27	14.74	16.81	11.45	0.92	2.14	0.47	2.76	2.03	1.83	NA	NA	uncharacterized LOC101769069	F-box domain, cyclin-like	AT2G26160.1		F-box family protein with a domain of unknown function (DUF295)	LOC_Os06g02110.1	OsFBX182 - F-box domain containing protein, expressed	NA	NA	NA	Sobic.010G009600.3; Sobic.010G009700.1	Seita.9G385800.1; Seita.4G010300.1
Sevir.2G067200	Sevir.8G183800	0.0533719	undirected	3.52	11.77	20.5	13.56	17.74	13.7	1.25	0.84	2.16	2.43	0.79	0.31	NA	NA	F-box protein At5g07610-like	F-box associated domain, type 3;F-box domain, cyclin-like	AT5G49610.1		F-box family protein	LOC_Os07g35050.1	OsFBX237 - F-box domain containing protein, expressed	NA	NA	NA	Sobic.006G245200.1	Seita.2G063900.1; Seita.2G064100.1
Sevir.9G313200	Sevir.8G183800	0.0529948	undirected	13.36	24.3	36.32	26.56	31.29	22.4	1.35	1.33	2.59	2.47	1.78	3.01	NA	NA		Zinc finger, C5HC2-type;Transcription factor jumonji, JmjN;JmjC domain	AT5G46910.1		Transcription factor jumonji (jmj) family protein / zinc finger (C5HC2 type) family protein	LOC_Os10g42690.1	jmjC domain containing protein, expressed	Zm00001d030108_T014; Zm00001d030108_T012	GRMZM2G180086_T01; GRMZM2G057466_T01	Bradi3g34240.2	Sobic.001G284400.1; Sobic.004G273100.1	Seita.9G307800.1; Seita.1G282900.1
Sevir.6G208800	Sevir.8G183800	0.0528312	undirected	4.93	15.05	22.49	16.96	17.81	12.03	1.5	0.57	0.9	1.05	1.02	0.74	NA	NA	uncharacterized LOC101764647	Zinc finger, RING/FYVE/PHD-type;S-adenosyl-L-methionine-dependent methyltransferase-like	AT5G55390.1	EDM2	ENHANCED DOWNY MILDEW 2	LOC_Os08g39250.1	EDM2, putative, expressed	Zm00001d052859_T002; Zm00001d052859_T001	GRMZM2G083411_T01	Bradi3g39730.2	Sobic.007G214900.3	Seita.6G201500.1
Sevir.6G014600	Sevir.8G183800	0.0519426	undirected	2.48	22.15	56.2	36.57	61.71	63.29	0.34	1.67	7.48	2.47	6.4	7.35	NA	NA	NA	NA				LOC_Os12g07390.1	expressed protein	NA	NA	NA	NA	NA
Sevir.5G432400	Sevir.8G183800	0.0519187	undirected	42.65	63.58	86.69	60.25	89.64	58.69	5.27	0.98	4.41	7.96	5.77	4.82	NA	NA	transcription factor bHLH78-like	Myc-type, basic helix-loop-helix (bHLH) domain	AT3G07340.1		basic helix-loop-helix (bHLH) DNA-binding superfamily protein	LOC_Os01g68700.2	BHLH transcription factor, putative, expressed	Zm00001d012067_T003; Zm00001d012067_T001	GRMZM2G030762_T02; GRMZM2G180406_T01	Bradi2g58630.2	Sobic.003G400600.1	Seita.5G426500.1
Sevir.2G038500	Sevir.8G183800	0.051835	undirected	6.29	35.65	56.97	50.29	53.38	58.64	1.28	4.96	5.49	10.12	3.77	5.48	NA	NA	uncharacterized LOC101762363					LOC_Os02g34920.1	apomixis-related protein Pca21, putative, expressed	NA	NA	NA	NA	Seita.2G033700.1; Seita.2G033800.1
Sevir.2G021200	Sevir.8G183800	0.0499355	undirected	0.29	2.13	3.08	1.96	3.34	2.64	0.21	0.07	0.58	0.2	0.39	0.57	NA	NA	uncharacterized LOC101759655	F-box domain, cyclin-like				LOC_Os07g23900.1	OsFBX234 - F-box domain containing protein, expressed	NA	NA	Bradi3g00670.3	Sobic.006G276801.1; Sobic.002G019300.2	Seita.2G016100.1; Seita.2G016000.1
Sevir.2G336200	Sevir.8G183800	0.0494469	undirected	0.84	4.24	9.98	13.91	13.28	9.88	0.33	0.46	1.06	8.13	4.42	1.2	NA	NA	NA	NA						NA	NA	NA	NA	NA
Sevir.8G081800	Sevir.8G183800	0.0492435	undirected	8.76	17.6	24.18	18.15	21.33	16.49	1.48	1.65	2.11	3.7	1.31	1.14	NA	NA	ZF-HD homeobox protein At4g24660-like	Homeodomain-like;ZF-HD homeobox protein, Cys/His-rich dimerisation domain;Homeodomain, ZF-HD class	AT1G14440.1; AT1G14440.2	AtHB31,HB31; AtHB31,HB31	homeobox protein 31; homeobox protein 31	LOC_Os11g13930.1; LOC_Os11g13930.1	ZF-HD protein dimerisation region containing protein, expressed; ZF-HD protein dimerisation region containing protein, expressed	Zm00001d049000_T001; Zm00001d020774_T001	GRMZM2G068330_T02; GRMZM5G896154_T01	Bradi4g21160.1; Bradi4g40270.2	Sobic.005G086700.4; Sobic.009G244200.2	Seita.8G080800.1; Seita.6G185900.1
Sevir.4G278600	Sevir.8G183800	0.048842	undirected	0.04	0.07	0.23	0.29	0.28	0.11	0.04	0.03	0.08	0.11	0.08	0.05	NA	NA		K+ potassium transporter	AT2G30070.1	ATKT1,ATKT1P,ATKUP1,KT1,KUP1	potassium transporter 1	LOC_Os06g45940.1	potassium transporter, putative, expressed	Zm00001d036621_T001; Zm00001d036622_T001	GRMZM2G146140_T02; GRMZM2G446729_T01	Bradi1g32380.1	Sobic.010G224400.1	Seita.4G266200.1
Sevir.1G229900	Sevir.8G183800	0.0488036	undirected	3.61	11.21	16.47	14.65	12.16	8.4	0.44	1.32	1.99	1.85	0.47	0.99	NA	NA			AT4G31860.1		Protein phosphatase 2C family protein	LOC_Os02g38804.1	protein phosphatase 2C containing protein, expressed	NA	NA	NA	NA	Seita.1G226400.1; Seita.1G226300.1
Sevir.2G031800	Sevir.8G183800	0.0486137	undirected	0.25	0.57	1.2	0.79	1.04	0.5	0.06	0.16	0.32	0.08	0.04	0.09	NA	NA	probable LRR receptor-like serine/threonine-protein kinase At2g16250-like	Protein kinase-like domain;Protein kinase, catalytic domain;Concanavalin A-like lectin/glucanase, subgroup	AT2G16250.1		Leucine-rich repeat protein kinase family protein	LOC_Os07g04220.1	wound and phytochrome signaling involved receptor like kinase, putative, expressed	Zm00001d018754_T001; Zm00001d006917_T001	GRMZM2G426156_T01; GRMZM2G162781_T01	Bradi1g57910.1	Sobic.002G027700.1; Sobic.001G108400.1	Seita.2G027000.1
Sevir.4G292600	Sevir.8G183800	0.0486051	undirected	5.85	9.89	14.91	11.59	15.23	9.19	1.07	0.68	2.04	1.6	1.37	2.46	NA	NA	NA	NA	AT1G07920.1		GTP binding Elongation factor Tu family protein	LOC_Os03g08010.1	elongation factor Tu, putative, expressed	Zm00001d037877_T002; Zm00001d037877_T005	GRMZM2G001327_T01; GRMZM2G343543_T03	Bradi1g06861.2; Bradi0012s00100.1	Sobic.010G182600.4; Sobic.010G182200.2	Seita.9G442900.1; Seita.9G443000.1
Sevir.4G292500	Sevir.8G183800	0.0481549	undirected	1.46	6.9	12.5	10.49	9.11	4.54	0.58	0.05	2.92	1.34	0.33	0.83	NA	NA		Peptidase C50, separase;SEPARIN core domain	AT4G22970.1	AESP,ESP,RSW4	homolog of separase	LOC_Os02g53120.1	Peptidase family C50, putative, expressed	Zm00001d052143_T013; Zm00001d052143_T009	GRMZM2G300624_T01	Bradi3g57691.1	Sobic.004G095200.1; Sobic.004G312400.2	Seita.4G280700.1; Seita.1G334600.1
Sevir.1G050000	Sevir.8G183800	0.0479377	undirected	0.58	2.3	3.66	2.22	4.22	2.59	0.19	0.31	0.21	0.62	0.86	0.57	NA	NA		Protein kinase, ATP binding site;Protein kinase-like domain;Leucine-rich repeat;Protein kinase, catalytic domain;Concanavalin A-like lectin/glucanase, subgroup	AT4G22130.1	SRF8	STRUBBELIG-receptor family 8	LOC_Os02g10110.1	Leucine Rich Repeat family protein, expressed	Zm00001d053676_T003; Zm00001d053676_T002	GRMZM2G454306_T02; GRMZM5G823563_T01	Bradi3g06990.1; Bradi1g44096.1	Sobic.004G078500.1	Seita.1G050800.1
Sevir.6G155000	Sevir.8G183800	0.046675	undirected	1.23	7.48	11.22	10.9	10.18	11.67	0.66	0.91	0.67	1.07	1.5	2.15	NA	NA								NA	NA	NA	NA	Seita.6G149000.1
Sevir.8G124300	Sevir.8G183800	0.0458298	undirected	0.77	2.87	4.37	4.02	4.55	3.23	0.26	0.75	1	1.41	0.76	0.98	NA	NA	NA	NA						NA	NA	NA	NA	NA
Sevir.9G145800	Sevir.8G183800	0.0452215	undirected	85.96	130.93	194.3	145.77	191.66	108.36	16	3.96	12.34	38.24	18.58	26.24	NA	NA	uncharacterized LOC101781327	Protein of unknown function DUF581	AT3G22550.1		Protein of unknown function (DUF581)	LOC_Os03g46260.1	DUF581 domain containing protein, expressed	Zm00001d013595_T001; Zm00001d013595_T004	GRMZM2G176748_T01	Bradi1g12960.5	Sobic.001G144200.1	Seita.9G147300.1
Sevir.7G101500	Sevir.8G183800	0.0447018	undirected	5.38	9.24	10.34	11.74	10.46	5.68	0.79	1.61	0.74	0.61	0.97	0.72	NA	NA		E2F Family;E2F transcription factor, CC-MB domain	AT2G36010.1	ATE2FA,E2F3	E2F transcription factor 3	LOC_Os02g33430.1	E2F family transcription factor protein, putative, expressed	NA	NA	Bradi5g09640.5	Sobic.006G074600.1	Seita.7G093800.1
Sevir.7G113400	Sevir.8G183800	0.0446938	undirected	4.12	6.34	8.36	6.39	8.51	6.39	0.43	1.1	1.32	1.12	0.33	0.5	NA	NA	DDT domain-containing protein DDB_G0282237-like	DDT domain superfamily;DDT domain, subgroup;DDT domain;WHIM2 domain;WHIM3 domain	AT5G08630.1		DDT domain-containing protein	LOC_Os02g35100.1	DDT domain containing protein, putative, expressed	Zm00001d050753_T001	GRMZM2G064145_T03	Bradi5g10777.1	Sobic.006G087800.1; Sobic.004G177600.1	Seita.7G105900.1; Seita.1G194200.1
Sevir.1G340400	Sevir.8G183800	0.0444619	undirected	1.76	3.64	7.18	7.93	6.6	6.83	0.5	0.58	0.95	2.42	1.34	0.6	NA	NA	NA	NA						NA	NA	NA	NA	Seita.1G333800.1
Sevir.6G192400	Sevir.8G183800	0.043697	undirected	2.95	7.71	14.68	9.76	11.94	10.75	0.98	0.94	2.73	1.22	1.55	1.79	NA	NA	protein TRANSPARENT TESTA 12-like	Multi antimicrobial extrusion protein	AT5G65380.1		MATE efflux family protein	LOC_Os08g37432.1	MATE efflux family protein, putative, expressed	Zm00001d050457_T002; Zm00001d050457_T001	GRMZM2G043075_T02; GRMZM2G031177_T01	Bradi3g38450.1; Bradi1g72007.1	Sobic.007G160700.1; Sobic.001G476700.2	Seita.6G186100.1; Seita.6G186200.1
Sevir.7G332100	Sevir.8G183800	0.0431429	undirected	7.59	12.62	17.1	13.03	16.55	15.98	0.48	0.65	1.96	1.33	0.53	0.94	NA	NA	uncharacterized LOC101771296	R3H-associated N-terminal domain;Single-stranded nucleic acid binding R3H	AT1G03250.1; AT1G03250.1	;	;	LOC_Os12g05000.1; LOC_Os11g04990.1	expressed protein; expressed protein	Zm00001d009482_T001; Zm00001d009482_T003	GRMZM2G099052_T01; GRMZM2G444194_T01	Bradi4g42940.1	Sobic.005G033200.1; Sobic.007G122932.1	Seita.7G322000.1; Seita.8G028100.1
Sevir.2G066800	Sevir.8G183800	0.0429106	undirected	0.81	5.48	11.01	5.84	9.65	7.34	0.4	1.37	1.98	0.56	1.91	0.89	NA	NA		F-box domain, cyclin-like	AT5G07610.1		F-box family protein	LOC_Os07g35050.1	OsFBX237 - F-box domain containing protein, expressed	Zm00001d019000_T001; Zm00001d018995_T001	GRMZM2G101060_T01; GRMZM2G434518_T01	Bradi1g27930.2; Bradi1g31940.2	Sobic.006G245200.1	Seita.2G063500.1; Seita.3G396500.1
Sevir.1G256900	Sevir.8G183800	0.0427943	undirected	11.85	18.83	23.96	22.97	23.19	20.32	3	4.49	1.4	3.42	1.09	3.36	NA	NA	NA	NA				LOC_Os08g24150.1	expressed protein	NA	NA	NA	Sobic.004G301300.1	Seita.1G252600.1
Sevir.6G151500	Sevir.8G183800	0.0424595	undirected	3.36	15.55	21.17	17.34	16.47	14.04	0.99	2.29	2.21	3.28	1.77	2.39	NA	NA		Ankyrin repeat-containing domain;Tetratricopeptide repeat;Tetratricopeptide repeat-containing domain;Ankyrin repeat;Tetratricopeptide TPR-1;Tetratricopeptide-like helical	AT3G04710.3		ankyrin repeat family protein	LOC_Os01g09384.1	ankyrin repeat domain containing protein, putative, expressed	NA	NA	NA	Sobic.001G288000.1	Seita.6G145700.1; Seita.9G286200.1
Sevir.9G368700	Sevir.8G183800	0.0421153	undirected	0.56	2.68	4.59	3.9	3.87	4.14	0.23	0.8	0.63	1.01	0.55	0.54	NA	NA	uncharacterized LOC101753925		AT3G02890.1		RING/FYVE/PHD zinc finger superfamily protein	LOC_Os03g30740.1	expressed protein	NA	NA	NA	Sobic.004G234600.1	Seita.9G362900.1; Seita.6G249600.1
Sevir.9G259600	Sevir.8G183800	0.0416399	undirected	0.57	2.29	4.54	2.48	4.25	1.69	0.08	0.59	1.23	0.6	0.5	0.64	NA	NA	uncharacterized LOC101766079		AT2G27830.1			LOC_Os06g04480.1	expressed protein	Zm00001d045432_T001	GRMZM2G448656_T01	NA	Sobic.010G026500.1	Seita.9G257300.1; Seita.4G025500.1
Sevir.8G150200	Sevir.8G183800	0.0414993	undirected	16.25	32.85	43.88	30.85	38.09	28.53	2.42	2.98	2.85	4.43	3.67	2.18	NA	NA			AT2G37340.1;	ATRSZ33,RSZ33;	arginine/serine-rich zinc knuckle-containing protein 33;	LOC_Os11g32720.1; LOC_Os11g32720.1	zinc knuckle domain containing protein, expressed; zinc knuckle domain containing protein, expressed	NA	NA	NA	Sobic.005G137900.1; Sobic.005G138000.1	Seita.8G140400.1
Sevir.2G212800	Sevir.8G183800	0.0414154	undirected	23.21	47.22	66.88	45.87	67.56	60.6	3.87	3.5	9.63	5.39	4.72	6.59	NA	NA	transcription factor HB29-like	Homeodomain-like;ZF-HD homeobox protein, Cys/His-rich dimerisation domain;Homeodomain, ZF-HD class	AT5G15210.1	ATHB30,HB30,ZFHD3	homeobox protein 30	LOC_Os09g24820.1	ZF-HD protein dimerisation region containing protein, expressed	Zm00001d020460_T001; Zm00001d005757_T001	GRMZM2G161315_T01; GRMZM2G051955_T01	Bradi4g30240.1; Bradi3g37040.1	Sobic.002G201400.1; Sobic.007G139200.1	Seita.2G204500.1; Seita.6G161100.1
Sevir.4G088700	Sevir.8G183800	0.0411582	undirected	10.04	14.63	24.71	22.82	20.6	18.72	1.49	2.04	3.76	4.42	0.86	2.68	NA	NA	uncharacterized LOC101765138	O-fucosyltransferase, plant;GDP-fucose protein O-fucosyltransferase	AT1G22460.1		O-fucosyltransferase family protein	LOC_Os06g11600.3	growth regulator related protein, putative, expressed	Zm00001d037199_T001	GRMZM6G438921_T01	Bradi1g45647.4	Sobic.010G087400.2	Seita.4G089300.1
Sevir.9G070100	Sevir.8G183800	0.0411359	undirected	0.37	2.62	4.09	2.17	3.45	2.15	0.09	0.38	0.52	0.21	0.34	0.35	NA	NA		GYF domain	AT5G42950.1		GYF domain-containing protein	LOC_Os07g04530.1	GYF domain containing protein, putative, expressed	Zm00001d034263_T004; Zm00001d034263_T006	GRMZM2G472827_T01	NA	Sobic.001G071600.2	Seita.9G071000.1
Sevir.2G442300	Sevir.8G183800	0.0407263	undirected	0.34	0.48	1.23	1.05	1.31	0.51	0.16	0.37	0.35	0.34	0.31	0.14	NA	NA	NA	NA						NA	NA	NA	Sobic.002G414850.1	Seita.2G429700.1
Sevir.8G140700	Sevir.8G183800	0.0406082	undirected	2.18	2.69	4.32	4.69	3.91	3.68	0.38	0.46	0.31	0.78	0.66	0.85	NA	NA	uncharacterized LOC101774826	BRO1 domain	AT5G14020.1; AT5G14020.1	;	Endosomal targeting BRO1-like domain-containing protein; Endosomal targeting BRO1-like domain-containing protein	LOC_Os11g31570.1; LOC_Os11g31570.2	expressed protein; expressed protein	Zm00001d000299_T002; Zm00001d000299_T003	GRMZM2G122954_T01	Bradi4g18270.1	Sobic.005G126300.1	Seita.8G132000.1
Sevir.7G060800	Sevir.8G183800	0.040292	undirected	0.08	0.56	0.85	0.73	0.73	0.44	0.06	0.03	0.19	0.37	0.27	0.23	NA	NA	putative B3 domain-containing protein Os04g0346900-like;putative B3 domain-containing protein Os04g0347400-like	DNA-binding pseudobarrel domain;B3 DNA binding domain	AT4G31650.1		Transcriptional factor B3 family protein	LOC_Os04g27960.1	B3 DNA binding domain containing protein, expressed	Zm00001d004358_T003; Zm00001d004358_T001	GRMZM2G109879_T02; GRMZM2G379661_T01	NA	Sobic.006G022000.1; Sobic.008G110101.1	Seita.7G054700.1; Seita.7G054900.1
Sevir.2G207600	Sevir.8G183800	0.0400235	undirected	0.1	0.53	0.65	0.87	0.92	0.51	0.07	0.13	0.14	0.4	0.22	0.22	NA	NA	NA	NA						NA	NA	NA	NA	NA
Sevir.6G153900	Sevir.8G183800	0.0391904	undirected	0.06	0.56	0.97	0.98	0.75	0.69	0.11	0.25	0.22	0.24	0.14	0.19	NA	NA	NA	NA				LOC_Os08g32420.1	expressed protein	NA	NA	NA	NA	Seita.6G148000.1
Sevir.1G180200	Sevir.8G183800	0.0385251	undirected	2.58	3.27	7.59	5.41	5.71	2.85	0.8	0.91	0.53	0.79	0.39	0.44	NA	NA	heparan-alpha-glucosaminide N-acetyltransferase-like	Protein of unknown function DUF1624	AT5G47900.1		Protein of unknown function (DUF1624)	LOC_Os02g32504.1	heparan-alpha-glucosaminide N-acetyltransferase, putative, expressed	Zm00001d016662_T003; Zm00001d008509_T002	GRMZM2G062848_T02; GRMZM2G569903_T01	Bradi3g44630.1; Bradi5g08907.1	Sobic.004G162200.1	Seita.1G177600.1
Sevir.4G240900	Sevir.8G183800	0.0385022	undirected	17.17	23.78	36.8	26.35	37.25	25.23	1.15	1.43	2.36	3.39	6.88	2.97	NA	NA	probable LRR receptor-like serine/threonine-protein kinase At1g14390-like	Protein kinase-like domain;Leucine-rich repeat;Serine-threonine/tyrosine-protein kinase catalytic domain;Protein kinase, catalytic domain	AT1G14390.1		Leucine-rich repeat protein kinase family protein	LOC_Os06g38970.1	expressed protein	Zm00001d046488_T001; Zm00001d046488_T002	GRMZM2G009995_T01; GRMZM2G054949_T01	Bradi1g37210.1	Sobic.010G177100.1	Seita.4G229500.1
Sevir.2G302600	Sevir.8G183800	0.0380656	undirected	0.1	0.88	1.16	1.29	1.21	0.5	0.13	0.5	0.35	0.29	0.15	0.33	NA	NA			AT2G32300.1	UCC1	uclacyanin 1	LOC_Os09g36940.1	plastocyanin-like domain containing protein, putative, expressed	Zm00001d022607_T001	GRMZM2G086628_T02	Bradi4g36621.1	Sobic.002G281100.1	Seita.2G291600.1
Sevir.3G240300	Sevir.8G183800	0.0380322	undirected	0.1	0.04	0.75	0.86	1.01	0.06	0.11	0.06	0.18	0.5	0.35	0.08	NA	NA	peroxidase 54-like	Haem peroxidase;Haem peroxidase, plant/fungal/bacterial;Plant peroxidase	AT5G06730.1		Peroxidase superfamily protein	LOC_Os03g13180.1	peroxidase precursor, putative, expressed	Zm00001d010218_T001; Zm00001d009373_T001	GRMZM2G117365_T01; GRMZM2G023840_T01	Bradi3g20130.1; Bradi3g33940.1	Sobic.009G144600.1; Sobic.009G144700.1	Seita.3G235100.1; Seita.3G235000.1
Sevir.5G442600	Sevir.8G183800	0.0379023	undirected	1.16	2.32	3.67	3.34	2.75	1.43	0.16	0.18	0.52	0.8	0.47	0.59	NA	NA	NA	NA						NA	NA	NA	NA	NA
Sevir.7G296500	Sevir.8G183800	0.037643	undirected	4.71	8.86	11.24	14.76	11.89	9.15	0.85	0.1	1.48	4.88	1.88	2.92	NA	NA	NA	NA						NA	NA	NA	NA	NA
Sevir.3G052200	Sevir.8G183800	0.0375924	undirected	49.98	60.98	106.94	75.29	97.12	67.32	15.82	3.42	11.6	22.26	5.21	4.76	NA	NA	NA	NA						NA	NA	NA	NA	Seita.3G051700.1
Sevir.9G174500	Sevir.8G183800	0.0374317	undirected	2.61	11.15	19.82	15.71	12.68	12.71	0.73	1.36	1.27	2.35	2.31	0.8	NA	NA		Uncharacterised domain XH	AT4G00380.1		XH/XS domain-containing protein	LOC_Os01g03570.1	transcription factor X1, putative, expressed	NA	NA	NA	NA	Seita.9G176000.1
Sevir.5G333300	Sevir.8G183800	0.0372806	undirected	0.27	0.31	2.15	1.26	1.84	0.96	0.18	0.1	0.58	0.4	0.74	0.32	NA	NA	probable indole-3-acetic acid-amido synthetase GH3.2-like	GH3 auxin-responsive promoter	AT4G37390.1	AUR3,BRU6,GH3-2,GH3.2,YDK1	Auxin-responsive GH3 family protein	LOC_Os01g55940.1	OsGH3.2 - Probable indole-3-acetic acid-amido synthetase, expressed	Zm00001d043350_T001; Zm00001d043350_T002	GRMZM2G033359_T01; GRMZM2G068701_T01	Bradi2g50840.1; Bradi1g22830.1	Sobic.003G306500.1; Sobic.001G331200.1	Seita.5G329500.1; Seita.9G358800.1
Sevir.3G401800	Sevir.8G183800	0.0369512	undirected	0.27	0.83	1.11	1.01	1.21	0.61	0.15	0.22	0.35	0.33	0.38	0.31	NA	NA	uncharacterized LOC101782264					LOC_Os07g36870.1	OsFBX252 - F-box domain containing protein, expressed	NA	NA	Bradi3g01419.1	Sobic.008G164525.1	Seita.3G385700.1; Seita.3G385500.1
Sevir.7G285700	Sevir.8G183800	0.0368884	undirected	0.8	1.91	3.72	2.38	4.18	1.86	0.23	0.5	0.64	1.11	1.1	0.13	NA	NA	NA	NA	AT1G33800.1		Protein of unknown function (DUF579)	LOC_Os12g10320.1	plant-specific domain TIGR01627 family protein, expressed	Zm00001d023950_T001; Zm00001d041782_T001	GRMZM2G073943_T01; GRMZM5G844894_T01	Bradi4g40400.1; Bradi1g33300.1	Sobic.008G072600.1; Sobic.005G087200.1	Seita.7G274700.1
Sevir.3G062300	Sevir.8G183800	0.0368242	undirected	0.03	0.23	0.41	0.45	0.43	0.1	0.04	0.09	0.28	0.34	0.12	0.11	NA	NA	uncharacterized LOC101782401	Protein of unknown function DUF674	AT5G01150.1		Protein of unknown function (DUF674)	LOC_Os05g02480.1	expressed protein	NA	NA	Bradi4g29230.1; Bradi2g00461.1	Sobic.009G017000.1; Sobic.009G017100.2	Seita.3G061600.1; Seita.3G061800.1
Sevir.2G210100	Sevir.8G183800	0.0366974	undirected	0.57	5.63	8.4	5.7	6.65	6.39	0.35	1.48	0.79	0.48	1.02	0.38	BAD1	BRANCH ANGLE DEFECTIVE1	transcription factor TEOSINTE BRANCHED 1-like	Transcription factor TCP subgroup;Transcription factor, TCP	AT3G18550.1	ATTCP18,BRC1,TCP18	TCP family transcription factor	LOC_Os09g24480.1	TCP family transcription factor, putative, expressed	Zm00001d005737_T001; Zm00001d020433_T001	GRMZM2G064628_T01; GRMZM2G110242_T01	Bradi4g29980.1	Sobic.002G198400.1; Sobic.007G135700.1	Seita.2G202000.1; Seita.9G123400.1
Sevir.4G252900	Sevir.8G183800	0.036682	undirected	26.33	45.15	57.15	40.07	57.91	33.79	2.32	6.03	6.86	3.93	4.68	5.1	NA	NA	auxin response factor 19-like	DNA-binding pseudobarrel domain;Auxin response factor;B3 DNA binding domain;AUX/IAA protein;Phox/Bem1p	AT1G19220.1	ARF11,ARF19,IAA22	auxin response factor 19	LOC_Os06g48950.1	auxin response factor 19, putative, expressed	Zm00001d014690_T006; Zm00001d014690_T004	GRMZM2G317900_T01; GRMZM2G102845_T01	Bradi1g34340.1; Bradi3g03407.1	Sobic.010G253300.1; Sobic.004G037800.1	Seita.4G240600.1; Seita.1G090900.1
Sevir.5G344600	Sevir.8G183800	0.0366637	undirected	2.56	4.23	5.32	5.06	5.13	3.92	0.74	1.82	0.55	1.23	0.55	0.85	NA	NA	BTB/POZ domain-containing protein At5g03250-like	NPH3 domain;BTB/POZ fold;BTB/POZ domain	AT5G03250.1		Phototropic-responsive NPH3 family protein	LOC_Os01g57230.1	BTBN1 - Bric-a-Brac, Tramtrack, Broad Complex BTB domain with non-phototropic hypocotyl 3 NPH3 and coiled-coil domains, expressed	Zm00001d043271_T001; Zm00001d002146_T001	GRMZM2G169782_T01; GRMZM2G169785_T01	Bradi2g51777.1; Bradi5g23307.2	Sobic.003G317000.1; Sobic.006G232700.1	Seita.5G340300.1; Seita.7G255300.1
Sevir.3G404300	Sevir.8G183800	0.0363826	undirected	3.26	5.51	7.82	5.53	7.66	6.69	0.51	1.08	0.65	0.93	0.99	0.37	NA	NA			AT5G51330.1	DYAD,SWI1	SWITCH1	LOC_Os12g42830.1	expressed protein	Zm00001d031119_T001	GRMZM2G300786_T01	NA	Sobic.008G176900.1	Seita.3G387800.1; Seita.9G153900.1
Sevir.7G135700	Sevir.8G183800	0.0361177	undirected	2.06	3.32	5.85	3.72	5.2	3.06	0.69	0.11	0.57	0.77	0.87	0.6	NA	NA	NA	NA	AT5G55350.1		MBOAT (membrane bound O-acyl transferase) family protein	LOC_Os07g35570.1	O-acyltransferase, putative, expressed	Zm00001d003390_T001	NA	Bradi1g25510.1; Bradi5g13630.1	Sobic.006G109850.1	Seita.7G127700.1
Sevir.1G144500	Sevir.8G183800	0.0358161	undirected	0.6	1.77	2.02	2.25	2.5	1.35	0.11	0.6	0.3	0.39	0.68	0.62	NA	NA	NA	NA						NA	NA	NA	NA	NA
Sevir.1G130200	Sevir.8G183800	0.0357264	undirected	0.45	3.04	4.61	3.54	3.43	0.97	0.23	0.56	1.07	0.5	0.43	0.22	NA	NA	MATE efflux family protein 5-like	Multi antimicrobial extrusion protein	AT5G52450.1		MATE efflux family protein	LOC_Os10g11354.1	MATE efflux family protein, putative, expressed	Zm00001d015964_T001; Zm00001d015963_T001	GRMZM2G078129_T01; GRMZM2G174458_T01	Bradi5g07160.1; Bradi3g11205.2	Sobic.004G129700.1; Sobic.004G129800.1	Seita.1G131500.1; Seita.1G131200.1
Sevir.1G288000	Sevir.8G183800	0.0355743	undirected	25.95	45.93	63.14	47.55	63.59	52.47	3.02	2.06	15.25	6.47	8.19	7.28	NA	NA	NA	NA	AT4G05320.2	UBQ10	polyubiquitin 10	LOC_Os06g46770.2	ubiquitin family protein, putative, expressed	Zm00001d015327_T001; Zm00001d053838_T003	GRMZM2G409726_T01; GRMZM2G419891_T05	Bradi3g04730.5; Bradi1g32860.3	Sobic.004G273300.1; Sobic.010G232100.1	Seita.1G282500.1; Seita.4G265000.1
Sevir.1G194600	Sevir.8G183800	0.035351	undirected	2.13	3.33	4.21	3.34	4.37	2.6	0.32	0.37	0.39	0.62	0.31	0.54	NA	NA		Protein of unknown function DUF3475;Protein of unknown function DUF668	AT1G34320.1; AT1G34320.1	;	Protein of unknown function (DUF668); Protein of unknown function (DUF668)	LOC_Os01g65330.1; LOC_Os01g65330.2	expressed protein; expressed protein	Zm00001d016792_T002; Zm00001d016792_T001	GRMZM2G113439_T02; GRMZM2G077621_T01	Bradi3g45582.1	Sobic.004G174100.1; Sobic.009G148300.1	Seita.1G190600.1
Sevir.4G221600	Sevir.8G183800	0.0352657	undirected	3.67	6.11	10.29	7.74	9.47	6.82	0.98	1.82	1.9	2.49	1.37	1.49	NA	NA	putative DNA-binding protein ESCAROLA-like	Domain of unknown function DUF296	AT1G76500.1	AHL29,SOB3	Predicted AT-hook DNA-binding family protein	LOC_Os06g41860.1	DNA binding protein, putative, expressed	Zm00001d046696_T001	GRMZM2G033480_T01	Bradi1g35720.2; Bradi3g53220.1	Sobic.010G196000.1	Seita.4G212100.1; Seita.4G026200.1
Sevir.2G272600	Sevir.8G183800	0.0351777	undirected	0.37	0.97	1.54	1.16	1.17	0.6	0.08	0.18	0.24	0.31	0.2	0.2	NA	NA	type I inositol 1,4,5-trisphosphate 5-phosphatase 12-like	Endonuclease/exonuclease/phosphatase;WD40 repeat;Inositol polyphosphate-related phosphatase;WD40/YVTN repeat-like-containing domain	AT2G43900.1		Endonuclease/exonuclease/phosphatase family protein	LOC_Os09g32440.1	endonuclease/exonuclease/phosphatase family domain containing protein, expressed	Zm00001d006063_T002; Zm00001d006063_T001	GRMZM2G422045_T01; GRMZM2G423567_T01	Bradi4g34270.1; Bradi3g40800.1	Sobic.002G254700.1	Seita.2G262300.1; Seita.6G217000.1
Sevir.8G153200	Sevir.8G183800	0.0349883	undirected	0.04	0.1	0.33	0.36	0.34	0.1	0.04	0.1	0.09	0.12	0.13	0.11	NA	NA	probable indole-3-acetic acid-amido synthetase GH3.5-like	GH3 auxin-responsive promoter;GH3 protein, group I	AT2G46370.4	FIN219,JAR1	Auxin-responsive GH3 family protein	LOC_Os05g50890.2	OsGH3.5 - Probable indole-3-acetic acid-amido synthetase, expressed	Zm00001d009714_T002; Zm00001d009714_T001	GRMZM2G162413_T02; GRMZM2G091276_T02	Bradi2g14830.1	Sobic.009G249900.3; Sobic.003G224100.1	Seita.8G143500.1; Seita.3G128200.1
Sevir.4G294000	Sevir.8G183800	0.0349816	undirected	2.32	6.91	9.38	5.74	8.56	5.52	0.58	0.69	0.98	1.02	1.06	1.22	TD1	THICK TASSEL DWARF1	leucine-rich repeat receptor-like kinase protein THICK TASSEL DWARF1-like	Leucine-rich repeat-containing N-terminal, type 2;Protein kinase-like domain;Serine/threonine-protein kinase, active site;Leucine-rich repeat, typical subtype;Serine/threonine- / dual specificity protein kinase, catalytic domain;Leucine-rich repeat;Serine-threonine/tyrosine-protein kinase catalytic domain;Protein kinase, catalytic domain	AT1G75820.1	ATCLV1,CLV1,FAS3,FLO5	Leucine-rich receptor-like protein kinase family protein	LOC_Os06g50340.1	receptor protein kinase CLAVATA1 precursor, putative, expressed	Zm00001d014793_T001; Zm00001d048968_T001	GRMZM2G300133_T01; GRMZM2G043584_T01	Bradi1g30160.1; Bradi1g69097.1	Sobic.010G267700.1; Sobic.005G091000.1	Seita.4G281800.1; Seita.9G281300.1
Sevir.2G069100	Sevir.8G183800	0.0348225	undirected	2.21	4.26	5.73	3.74	5.77	4.13	0.25	0.79	0.53	0.49	0.94	0.42	NA	NA	F-box protein At5g07610-like	F-box domain, cyclin-like	AT3G16210.1		F-box family protein	LOC_Os07g35050.1	OsFBX237 - F-box domain containing protein, expressed	NA	NA	NA	NA	Seita.2G066200.1; Seita.2G065000.1
Sevir.2G017300	Sevir.8G183800	0.0348018	undirected	0.02	0.57	2.75	1.96	1.31	0.25	0.05	0.06	0.67	0.54	0.35	0.13	NA	NA	NA	NA				LOC_Os01g66670.1	expressed protein	NA	NA	NA	NA	NA
Sevir.3G240700	Sevir.8G183800	0.0347948	undirected	0.17	0.62	1.22	1.8	1.87	0.35	0.12	0.38	0.65	1	0.55	0.2	NA	NA								NA	NA	NA	NA	NA
Sevir.5G031200	Sevir.8G183800	0.0346432	undirected	0.09	0.33	0.35	0.33	0.37	0.12	0.06	0.08	0.1	0.08	0.07	0.09	NA	NA	probable WRKY transcription factor 31-like	DNA-binding WRKY	AT4G04450.1	AtWRKY42,WRKY42	WRKY family transcription factor	LOC_Os01g18584.1	WRKY9, expressed	Zm00001d040554_T001; Zm00001d008190_T001	GRMZM2G327349_T01; GRMZM2G092666_T01	Bradi2g11170.2	Sobic.003G138400.1; Sobic.009G234900.1	Seita.5G032600.1; Seita.3G054500.1
Sevir.6G246800	Sevir.8G183800	0.0340776	undirected	0.52	0.69	1.24	1.16	1.06	0.74	0.25	0.12	0.21	0.19	0.37	0.16	NA	NA						LOC_Os09g36970.1	expressed protein	Zm00001d053230_T001; Zm00001d032012_T001	GRMZM2G307637_T01; GRMZM2G342687_T01	NA	Sobic.007G176500.1	Seita.6G240700.1
Sevir.2G066100	Sevir.8G183800	0.0339781	undirected	0.1	0.29	0.42	0.4	0.38	0.3	0.07	0.05	0.11	0.08	0.15	0.11	NA	NA	F-box/kelch-repeat protein At3g23880-like	F-box domain, cyclin-like				LOC_Os07g35050.1	OsFBX237 - F-box domain containing protein, expressed	Zm00001d018994_T001	NA	NA	Sobic.002G059100.2; Sobic.002G059500.1	Seita.2G062900.1; Seita.3G396500.1
Sevir.5G011400	Sevir.8G183800	0.0337472	undirected	0.74	1.17	2.26	1.63	2.07	1.29	0.42	0.33	0.46	0.53	0.68	0.3	NA	NA	uncharacterized LOC101778670	UV radiation resistance protein/autophagy-related protein 14	AT4G08540.1		DNA-directed RNA polymerase II protein	LOC_Os07g43322.1	expressed protein	Zm00001d006916_T005; Zm00001d006916_T003	GRMZM2G162798_T04; GRMZM2G382106_T03	Bradi1g20720.1	Sobic.002G382600.1	Seita.5G011300.1; Seita.2G397000.1
Sevir.2G257900	Sevir.8G183800	0.0332084	undirected	0.39	1.01	1.66	1.64	1.94	1.3	0.24	0.11	0.43	0.85	0.8	0.25	NA	NA						LOC_Os07g36870.1	OsFBX252 - F-box domain containing protein, expressed	NA	NA	NA	Sobic.002G174500.1; Sobic.002G334600.1	Seita.2G247100.1; Seita.8G041500.1
Sevir.2G069000	Sevir.8G183800	0.0332026	undirected	0.33	2.03	3.5	2.97	3.15	2.34	0.18	0.38	0.92	1.38	1.04	0.95	NA	NA		F-box domain, cyclin-like				LOC_Os07g23900.1	OsFBX234 - F-box domain containing protein, expressed	Zm00001d030683_T002; Zm00001d030683_T001	GRMZM2G171713_T01	NA	Sobic.008G134100.3; Sobic.009G028800.1	Seita.2G066100.1; Seita.2G020100.1
Sevir.2G296900	Sevir.8G183800	0.0330235	undirected	0.19	0.28	0.67	0.64	0.57	0.12	0.14	0.25	0.21	0.19	0.21	0.1	NA	NA	protein ODORANT1-like	Myb domain;Homeodomain-like;SANT/Myb domain	AT4G12350.1	AtMYB42,MYB42	myb domain protein 42	LOC_Os09g36250.1	MYB family transcription factor, putative, expressed	Zm00001d021296_T002; Zm00001d021296_T004	GRMZM2G104551_T01; GRMZM2G138427_T01	Bradi4g36210.1; Bradi3g42430.2	Sobic.002G275500.3; Sobic.007G132600.1	Seita.2G286400.1; Seita.6G238400.1
Sevir.2G167200	Sevir.8G183800	0.0326573	undirected	1.33	2.29	2.99	2.56	3.04	2.48	0.61	0.54	0.74	0.41	0.55	0.48	NA	NA	ras-related protein RGP1-like	Small GTPase superfamily, Ras type;Small GTP-binding protein domain;Small GTPase superfamily, Rab type;Small GTPase superfamily, Rho type;Ran GTPase;Small GTPase superfamily;P-loop containing nucleoside triphosphate hydrolase	AT5G47960.1	ATRABA4C,RABA4C,SMG1	RAB GTPase homolog A4C	LOC_Os09g10940.1	ras-related protein, putative, expressed	Zm00001d005504_T001; Zm00001d048222_T001	GRMZM2G019119_T01; GRMZM2G061280_T02	Bradi4g27130.1; Bradi3g23330.1	Sobic.002G153500.1; Sobic.001G475500.1	Seita.2G162900.1; Seita.9G248600.1
Sevir.3G403400	Sevir.8G183800	0.0326086	undirected	7.99	10.7	16.16	11.29	15.09	11.67	0.9	2.09	1.6	0.23	3.35	2.51	NA	NA	2-aminoethanethiol dioxygenase-like	Cysteamine dioxygenase;RmlC-like cupin domain;RmlC-like jelly roll fold	AT5G15120.1		Protein of unknown function (DUF1637)	LOC_Os12g42860.1	2-aminoethanethiol dioxygenase, putative, expressed	NA	NA	NA	NA	Seita.3G387300.1
Sevir.5G220000	Sevir.8G183800	0.0319228	undirected	1.85	2.76	3.81	3.73	4.08	3.27	0.52	0.92	0.27	1.1	0.81	0.3	NA	NA	NA	NA	AT2G39415.1		F-box family protein	LOC_Os01g41250.1	OsFBX17 - F-box domain containing protein, expressed	NA	NA	NA	NA	Seita.5G213200.1
Sevir.6G161800	Sevir.8G183800	0.0317312	undirected	1.26	2.86	4.06	4.45	3.42	2.01	0.28	0.22	1.29	0.83	0.4	0.37	NA	NA	NA	NA	AT3G18610.1	ATNUC-L2,NUC-L2,PARLL1	nucleolin like 2	LOC_Os08g33350.1	expressed protein	NA	NA	NA	NA	Seita.6G155700.1
Sevir.1G169500	Sevir.8G183800	0.0314991	undirected	181.45	290.86	383.11	297	356.81	255.7	78.87	88.13	86.76	25.61	34.57	51	NA	NA	NA	NA						NA	NA	NA	Sobic.004G153501.1	Seita.1G167400.1
Sevir.3G105200	Sevir.8G183800	0.0314876	undirected	0.62	2.69	4.32	2.95	3.3	3.27	0.24	0.22	0.49	0.72	0.53	0.45	NA	NA	zinc finger CCCH domain-containing protein 34-like	Zinc finger, CCCH-type	AT2G02160.1		CCCH-type zinc finger family protein	LOC_Os05g08400.1	zinc finger C-x8-C-x5-C-x3-H type family protein, expressed	NA	NA	NA	Sobic.009G063700.1	Seita.3G102900.1
Sevir.6G195600	Sevir.8G183800	0.0314518	undirected	97.72	149.73	185.38	152.04	203.2	136.4	7.69	16.11	40.62	32.19	28.87	22.33	NA	NA	NA	NA	AT5G64260.1	EXL2	EXORDIUM like 2	LOC_Os08g37840.1	phosphate-induced protein 1 conserved region domain containing protein, expressed	Zm00001d052799_T001; Zm00001d044864_T001	GRMZM5G868730_T01; GRMZM2G090226_T01	Bradi3g38720.1	Sobic.007G225400.1	Seita.6G188900.1
Sevir.3G046000	Sevir.8G183800	0.0314147	undirected	0.94	5.73	8.57	4.78	6.59	2.95	0.34	0.31	0.35	1.14	1.01	0.33	NA	NA		Armadillo-type fold;HECT domain;Armadillo-like helical	AT5G02880.1	UPL4	ubiquitin-protein ligase 4	LOC_Os05g03100.1	HECT-domain domain containing protein, expressed	Zm00001d035509_T001; Zm00001d035461_T001	GRMZM2G124297_T01; GRMZM2G380619_T01	Bradi2g37870.2	Sobic.009G025200.1	Seita.3G045100.1
Sevir.6G147500	Sevir.8G183800	0.0314004	undirected	1.71	3.51	4.41	3.44	3.87	3.23	0.53	0.58	0.94	0.89	0.71	0.61	NA	NA	NA	NA						NA	NA	NA	NA	Seita.6G142500.1
Sevir.4G101700	Sevir.8G183800	0.0313157	undirected	21.73	27.14	58.42	46.98	51.01	46.11	6.47	8.04	4.48	12.94	4.24	10.54	NA	NA	uncharacterized LOC101772424	Transcription factor MYC/MYB N-terminal	AT1G60060.1		Serine/threonine-protein kinase WNK (With No Lysine)-related	LOC_Os06g12740.1	expressed protein	Zm00001d044806_T001; Zm00001d044806_T002	GRMZM2G136831_T02; GRMZM2G116185_T04	Bradi1g44980.1	Sobic.010G095800.1; Sobic.004G241500.1	Seita.4G101900.1; Seita.1G316900.1
Sevir.9G566900	Sevir.8G183800	0.0312186	undirected	11.16	16.57	27.46	18.45	22.25	17.38	1.2	0.73	3.26	4.76	1.37	1.55	NA	NA	MAP7 domain-containing protein 1-like	;Remorin, C-terminal	AT2G02170.1; AT2G02170.2	;	Remorin family protein; Remorin family protein	LOC_Os03g02840.1; LOC_Os03g02840.1	remorin family protein, putative, expressed; remorin family protein, putative, expressed	Zm00001d027403_T001; Zm00001d048481_T001	GRMZM2G104468_T01; GRMZM2G171595_T01	Bradi1g77177.1	Sobic.001G528600.1	Seita.9G563500.1
Sevir.2G021700	Sevir.8G183800	0.0308727	undirected	0.76	1.76	2.64	2.81	2.69	0.78	0.36	0.18	0.32	1.96	0.72	0.28	NA	NA		Protein of unknown function DUF1719, Oryza sativa;WW domain				LOC_Os12g29820.1	expressed protein	Zm00001d047325_T001	GRMZM2G359033_T01	NA	Sobic.001G330925.1	Seita.2G016500.1; Seita.8G074300.1
Sevir.2G450500	Sevir.8G183800	0.0307082	undirected	0.93	2.12	2.44	2.09	2.21	1.53	0.33	0.36	0.25	0.72	0.24	0.44	NA	NA		Poly(A) polymerase;Nucleotidyltransferase, class I, C-terminal-like;Poly(A) polymerase, central domain;Nucleotidyl transferase domain	AT3G06560.1	PAPS3	poly(A) polymerase 3	LOC_Os07g48890.1	expressed protein	Zm00001d022535_T004; Zm00001d022535_T005	GRMZM2G470461_T06; GRMZM2G420732_T01	NA	Sobic.002G423100.1	Seita.2G438100.1
Sevir.9G431800	Sevir.8G183800	0.0307043	undirected	0.01	0.21	0.44	0.42	0.51	0.13	0.02	0.17	0.1	0.26	0.38	0.08	NA	NA	GDSL esterase/lipase At4g16230-like	Lipase, GDSL;SGNH hydrolase-type esterase domain	AT2G23540.1		GDSL-like Lipase/Acylhydrolase superfamily protein	LOC_Os03g19670.1	GDSL-like lipase/acylhydrolase, putative, expressed	Zm00001d047620_T003; Zm00001d047620_T002	GRMZM2G172099_T01	Bradi1g64327.1; Bradi1g18470.1	Sobic.001G394000.1; Sobic.002G409000.1	Seita.9G427600.1; Seita.2G424400.1
Sevir.7G234500	Sevir.8G183800	0.0304121	undirected	2.33	4.63	6.01	5.43	5.49	5.38	0.98	0.86	0.97	0.43	0.68	0.88	NA	NA								NA	NA	NA	NA	Seita.7G222800.1
Sevir.6G153700	Sevir.8G183800	0.0301804	undirected	0.16	1.28	2.8	1.92	1.77	1.71	0.1	0.19	0.24	0.57	0.46	0.57	NA	NA	NA	NA						NA	NA	NA	NA	Seita.6G147800.1
Sevir.1G374400	Sevir.8G183800	0.0300129	undirected	0.2	0.32	1.16	1.02	1.28	0.82	0.03	0.04	0.19	0.8	0.29	0.51	NA	NA	NA	NA	AT5G60800.1		Heavy metal transport/detoxification superfamily protein	LOC_Os02g57360.1	heavy metal-associated domain containing protein, expressed	Zm00001d051905_T001	GRMZM2G120964_T02	Bradi3g55490.1; Bradi1g00770.1	Sobic.004G346500.1; Sobic.006G032200.1	Seita.1G367800.1
Sevir.7G148500	Sevir.8G183800	0.0292085	undirected	0.33	0.47	1.08	0.65	0.79	0.61	0.12	0.14	0.28	0.31	0.17	0.12	NA	NA	NA	NA	AT1G24530.1		Transducin/WD40 repeat-like superfamily protein	LOC_Os04g40560.1	WD domain, G-beta repeat domain containing protein, expressed	Zm00001d025699_T001; Zm00001d003272_T001	GRMZM2G051852_T01; GRMZM2G022627_T01	Bradi5g13610.1	Sobic.006G123000.1	Seita.7G140200.1
Sevir.6G205900	Sevir.8G183800	0.0290976	undirected	0.48	1.47	1.94	1.15	2.13	1.11	0.23	0.17	0.46	0.34	0.65	0.16	NA	NA						LOC_Os01g14170.1	expressed protein	NA	NA	Bradi2g10458.1; Bradi2g10472.1	Sobic.007G217800.1; Sobic.007G217900.3	Seita.6G198500.1; Seita.6G198400.1
Sevir.1G042400	Sevir.8G183800	0.0290613	undirected	3.91	11.16	22.88	12.71	15.29	7.48	1.01	2.69	5.51	3.73	1.93	1.87	NA	NA	cytochrome P450 734A2-like	Cytochrome P450, conserved site;Cytochrome P450, E-class, group I;Cytochrome P450	AT2G26710.1	BAS1,CYP72B1,CYP734A1	Cytochrome P450 superfamily protein	LOC_Os02g11020.1	cytochrome P450 72A1, putative, expressed	Zm00001d053617_T002; Zm00001d053617_T001	GRMZM2G107322_T01; GRMZM5G852663_T01	Bradi3g07690.1; Bradi1g36800.2	Sobic.004G086400.1; Sobic.010G182966.1	Seita.1G042800.1; Seita.4G224700.1
Sevir.3G200100	Sevir.8G183800	0.0285868	undirected	14.33	28.25	30.02	27.47	25.29	20.29	2.05	4.42	1.6	0.83	1.34	1.53	NA	NA	protein PHR1-LIKE 1-like	MYB-CC type transcription factor, LHEQLE-containing domain;Myb domain;Homeodomain-like;Myb domain, plants;SANT/Myb domain	AT2G01060.1		myb-like HTH transcriptional regulator family protein	LOC_Os05g41240.1	Myb-like DNA-binding domain containing protein, putative, expressed	Zm00001d038546_T004; Zm00001d038546_T002	GRMZM2G117854_T01; GRMZM2G061748_T01	Bradi2g21407.3	Sobic.009G180500.1	Seita.3G195600.1
Sevir.4G237800	Sevir.8G183800	0.0284725	undirected	0.62	1.43	1.97	1.23	1.84	0.75	0.18	0.15	0.47	0.03	0.49	0.18	NA	NA	death-inducer obliterator 1-like	Transcription elongation factor S-IIM;Spen paralogue and orthologue SPOC, C-terminal;Transcription elongation factor S-II, central domain	AT5G11430.1		SPOC domain / Transcription elongation factor S-II protein	LOC_Os02g11780.1	transcription factor S-II, central domain containing protein, expressed	NA	NA	NA	Sobic.010G180200.3	Seita.4G226400.1
Sevir.6G023800	Sevir.8G183800	0.0283515	undirected	2.37	4.09	5.93	3.24	6.03	3.07	0.37	0.07	0.6	0.66	0.41	0.79	NA	NA	probable RNA-dependent RNA polymerase SHL2-like	RNA-dependent RNA polymerase, eukaryotic-type	AT3G49500.1	RDR6,SDE1,SGS2	RNA-dependent RNA polymerase 6	LOC_Os01g34350.1	RNA-dependent RNA polymerase, putative, expressed	Zm00001d040988_T001	GRMZM2G145201_T01	Bradi2g46870.1; Bradi1g55350.2	Sobic.007G076600.1; Sobic.003G177000.1	Seita.6G025100.1; Seita.6G025000.1
Sevir.3G266000	Sevir.8G183800	0.0283312	undirected	2.36	9.71	12.95	13.76	11.36	12.59	0.94	3.85	0.43	3.8	2.48	2.11	NA	NA	uncharacterized LOC101762433	SAWADEE domain	AT4G25330.1			LOC_Os05g32100.1	expressed protein	Zm00001d038080_T002; Zm00001d038080_T001	GRMZM2G037948_T01; GRMZM2G149392_T02	NA	Sobic.009G122700.1	Seita.3G259500.1
Sevir.8G201600	Sevir.8G183800	0.0283199	undirected	4.4	11.87	16.4	10.93	14.68	7.68	1.74	4.98	1.82	4.61	2.73	1.93	NA	NA		Cyclin-dependent kinase inhibitor	AT1G49620.1	ICK5,ICN6,KRP7	Cyclin-dependent kinase inhibitor family protein	LOC_Os11g40030.1	cyclin-dependent kinase inhibitor, putative, expressed	NA	NA	NA	Sobic.005G187000.1	Seita.8G192900.1
Sevir.9G565200	Sevir.8G183800	0.0283067	undirected	13.9	22.98	53.6	32.03	41.36	40.66	3.19	4.39	7.21	3.18	4.39	2.6	NA	NA	MADS-box transcription factor 50-like	Transcription factor, K-box	AT2G45660.1	AGL20,ATSOC1,SOC1	AGAMOUS-like 20	LOC_Os03g03070.1	transcription factor, putative, expressed	Zm00001d048474_T001; Zm00001d027425_T001	GRMZM2G171365_T01; GRMZM2G026223_T04	Bradi1g77020.1	Sobic.001G526800.2; Sobic.001G314400.1	Seita.9G561200.1
Sevir.7G281500	Sevir.8G183800	0.0282498	undirected	0.95	1.54	2.3	1.6	2.43	1.76	0.21	0.15	0.37	0.52	0.7	0.21	NA	NA	uncharacterized LOC101763055	YTH domain	AT1G48110.2	ECT7	evolutionarily conserved C-terminal region 7	LOC_Os01g22630.1	ECT protein, putative, expressed	Zm00001d010826_T001; Zm00001d032090_T001	NA	NA	Sobic.009G054400.2	Seita.7G270400.1; Seita.2G149700.1
Sevir.5G266300	Sevir.8G183800	0.0282072	undirected	0.87	4.36	6.25	3.92	4.57	3.6	0.12	0.81	0.72	0.73	1.38	0.59	NA	NA	WUSCHEL-related homeobox 7-like	Homeodomain-like;Homeobox domain	AT2G33880.1	HB-3,STIP,WOX9	homeobox-3	LOC_Os01g47710.1	homeobox domain containing protein, expressed	Zm00001d043937_T001; Zm00001d039017_T001	GRMZM2G031882_T02; GRMZM2G133972_T01	Bradi2g46055.1; Bradi2g16444.1	Sobic.003G250100.2; Sobic.009G233000.1	Seita.5G263100.1; Seita.3G145800.1
Sevir.4G240700	Sevir.8G183800	0.0281341	undirected	6.12	8.81	11.83	7.76	12.24	7.05	0.79	0.18	1.74	1.8	1.19	0.71	NA	NA	probable LRR receptor-like serine/threonine-protein kinase At1g34110-like	Protein kinase, ATP binding site;Leucine-rich repeat-containing N-terminal, type 2;Protein kinase-like domain;Serine/threonine-protein kinase, active site;Leucine-rich repeat, typical subtype;Serine/threonine- / dual specificity protein kinase, catalytic domain;Leucine-rich repeat;Protein kinase, catalytic domain	AT1G34110.1		Leucine-rich receptor-like protein kinase family protein	LOC_Os06g38990.1	receptor-like protein kinase 2 precursor, putative, expressed	Zm00001d046485_T001; Zm00001d001840_T001	GRMZM2G148702_T01; AC194873.3_FGT006	Bradi1g37190.1; Bradi3g39150.1	Sobic.010G177300.1; Sobic.006G013300.1	Seita.4G229300.1; Seita.6G194500.1
Sevir.3G196400	Sevir.8G183800	0.0280682	undirected	7.39	15.56	33.76	23.48	19.73	23.12	1.23	3.19	6.12	4.09	4.33	2.73	NA	NA	ethylene-responsive transcription factor 8-like	DNA-binding, integrase-type;AP2/ERF domain	AT1G28360.1	ATERF12,ERF12	ERF domain protein 12	LOC_Os05g41760.1	AP2 domain containing protein, expressed	Zm00001d010676_T001; Zm00001d038584_T001	GRMZM2G066158_T01; GRMZM2G020016_T01	Bradi2g21067.1; Bradi5g21250.3	Sobic.009G184300.1; Sobic.007G077300.1	Seita.3G192000.1; Seita.6G023700.1
Sevir.6G153300	Sevir.8G183800	0.0280175	undirected	0.23	1.21	1.74	1.08	1.29	0.81	0.14	0.62	0.65	0.46	0.27	0.09	NA	NA						LOC_Os08g32420.1	expressed protein	NA	NA	NA	NA	Seita.6G147500.1
Sevir.3G240600	Sevir.8G183800	0.0280046	undirected	6.2	12.54	17.33	15.98	14.43	5.44	1.71	0.56	2.56	4.85	3.83	1.13	NA	NA		Glycosyl transferase, family 8;Nucleotide-diphospho-sugar transferases	AT1G77130.1; AT1G77130.1	GUX3,PGSIP2; GUX3,PGSIP2	plant glycogenin-like starch initiation protein 2; plant glycogenin-like starch initiation protein 2	LOC_Os01g65780.1; LOC_Os01g65780.2	glycosyl transferase, putative, expressed; glycosyl transferase, putative, expressed	Zm00001d038229_T001; Zm00001d038229_T002	GRMZM2G058472_T02; GRMZM2G002023_T02	Bradi2g24737.4; Bradi2g56810.1	Sobic.009G144200.1; Sobic.003G376700.1	Seita.3G235400.1; Seita.5G402400.1
Sevir.1G153300	Sevir.8G183800	0.0279681	undirected	3.01	4.44	6.09	3.92	6.66	4.19	0.38	0.28	0.29	1.11	0.68	0.27	NA	NA		Protein kinase-like domain;Serine/threonine-protein kinase, active site;Serine/threonine- / dual specificity protein kinase, catalytic domain;Protein kinase, catalytic domain	AT5G55830.1		Concanavalin A-like lectin protein kinase family protein	LOC_Os02g26160.1	receptor lectin kinase like protein, putative, expressed	Zm00001d015891_T001	GRMZM5G816031_T01	Bradi2g22330.1	Sobic.004G118800.1	Seita.1G152400.1
Sevir.5G354100	Sevir.8G183800	0.0279136	undirected	16.06	26.24	32.06	24.32	36.13	22.17	2.85	7.5	8.18	7.49	4.2	1.75	NA	NA	NA	NA	AT5G44860.1			LOC_Os01g58620.1	expressed protein	Zm00001d043193_T001; Zm00001d012576_T001	GRMZM2G046911_T01; GRMZM2G438299_T01	Bradi2g52480.2; Bradi3g13250.1	Sobic.003G325700.1; Sobic.007G006600.1	Seita.6G007000.1
Sevir.5G316700	Sevir.8G183800	0.0276145	undirected	0.81	1.62	2.44	2.21	1.65	1.22	0.1	0.5	0.4	0.64	0.51	0.28	NA	NA	protein IQ-DOMAIN 14-like	Domain of unknown function DUF4005;IQ motif, EF-hand binding site;P-loop containing nucleoside triphosphate hydrolase	AT3G16490.1	IQD26	IQ-domain 26	LOC_Os01g53980.1	IQ calmodulin-binding motif family protein, expressed	Zm00001d043510_T002; Zm00001d043510_T001	GRMZM2G177929_T02; AC203173.3_FGT001	Bradi2g49490.2	Sobic.003G292000.2	Seita.5G313800.1; Seita.3G174000.1
Sevir.5G233000	Sevir.8G183800	0.0275674	undirected	0.34	1.17	1.49	1.08	1.43	1.1	0.14	0.3	0.19	0.43	0.51	0.08	NA	NA	FBD-associated F-box protein At5g60610-like	FBD domain;F-box domain, cyclin-like				LOC_Os01g41290.1	OsFBD5 - F-box and FBD domain containing protein, expressed	NA	NA	NA	NA	Seita.5G225700.1; Seita.5G215300.1
Sevir.9G425100	Sevir.8G183800	0.027436	undirected	14.43	38.46	55.96	39.93	40.9	17.16	2.88	4.99	6.79	6.62	10.69	4.32	NA	NA	ABSCISIC ACID-INSENSITIVE 5-like protein 2-like	Basic-leucine zipper domain	AT2G41070.3; AT3G56850.1; AT2G41070.2	ATBZIP12,DPBF4,EEL; AREB3,DPBF3; ATBZIP12,DPBF4,EEL	Basic-leucine zipper (bZIP) transcription factor family protein; ABA-responsive element binding protein 3; Basic-leucine zipper (bZIP) transcription factor family protein	LOC_Os03g20650.1; LOC_Os03g20650.1; LOC_Os03g20650.1	bZIP transcription factor domain containing protein, expressed; bZIP transcription factor domain containing protein, expressed; bZIP transcription factor domain containing protein, expressed	NA	NA	Bradi1g63840.1; Bradi3g00300.1	Sobic.001G388300.2	Seita.9G421000.1
Sevir.6G030300	Sevir.8G183800	0.0274269	undirected	0.41	2.7	4.38	2.17	3.62	2.84	0.02	0.59	0.7	0.46	0.99	1.18	NA	NA		F-box domain, cyclin-like	AT4G05460.1		RNI-like superfamily protein	LOC_Os08g09450.1	OsFBL41 - F-box domain and LRR containing protein, expressed	NA	NA	Bradi1g61973.1	NA	Seita.6G032800.1
Sevir.7G202100	Sevir.8G183800	0.0273129	undirected	9.38	27.24	24.57	34.08	30.33	23.17	1.54	4.07	3.63	12.12	6.63	8.04	NA	NA	squamosa promoter-binding-like protein 7-like	Transcription factor, SBP-box	AT1G69170.1		Squamosa promoter-binding protein-like (SBP domain) transcription factor family protein	LOC_Os04g46580.1	OsSPL7 - SBP-box gene family member, expressed	Zm00001d026175_T001; Zm00001d006451_T001	GRMZM2G148467_T01; GRMZM2G113779_T01	Bradi5g17722.2; Bradi2g59110.1	Sobic.006G171000.1; Sobic.002G312200.2	Seita.7G190000.1; Seita.2G254300.1
Sevir.2G219000	Sevir.8G183800	0.0272293	undirected	62.55	104.02	188.76	105.28	145.59	84.44	21.28	24.4	42.03	10.89	19.28	8.57	NA	NA	S-adenosylmethionine decarboxylase proenzyme-like	S-adenosylmethionine decarboxylase subgroup;S-adenosylmethionine decarboxylase, conserved site;S-adenosylmethionine decarboxylase, core;S-adenosylmethionine decarboxylase	AT3G02470.3	SAMDC	S-adenosylmethionine decarboxylase	LOC_Os09g25620.3	CPuORF8 - conserved peptide uORF-containing transcript, expressed	Zm00001d020543_T001; Zm00001d003157_T001	GRMZM2G461159_T01; GRMZM2G060369_T02	Bradi4g30637.1; Bradi5g14640.1	Sobic.002G206700.1; Sobic.006G135600.4	Seita.2G210300.1; Seita.7G154200.1
Sevir.4G166400	Sevir.8G183800	0.0271929	undirected	0.19	0.8	1.08	0.97	1.17	0.88	0.11	0.17	0.17	0.6	0.5	0.25	NA	NA	F-box/FBD/LRR-repeat protein At1g16930-like	FBD domain;F-box domain, cyclin-like	AT1G13570.1		F-box/RNI-like superfamily protein	LOC_Os02g29150.1	OsFBO11 - F-box and other domain containing protein, expressed	NA	NA	Bradi2g42758.1; Bradi2g42790.3	Sobic.001G498700.1; Sobic.006G225800.1	Seita.4G146700.1; Seita.4G146800.1
Sevir.7G326100	Sevir.8G183800	0.0271723	undirected	3.95	6.52	9.01	6.12	7.6	5.24	0.29	0.84	0.58	1.05	0.37	0.66	NA	NA	probable calcium-binding protein CML50-like	EF-Hand 1, calcium-binding site;EF-hand-like domain;Calcium-binding EF-hand	AT3G10300.3		Calcium-binding EF-hand family protein	LOC_Os12g04240.1	peflin, putative, expressed	Zm00001d052458_T001	GRMZM2G357595_T01	Bradi4g43290.1; Bradi4g26500.1	Sobic.005G028700.1	Seita.7G316300.1; Seita.8G025700.1
Sevir.2G015100	Sevir.8G183800	0.0268147	undirected	0.28	0.48	0.86	0.65	0.62	0.58	0.19	0.14	0.22	0.34	0.12	0.05	NA	NA		FBD domain;F-box domain, cyclin-like	AT3G03360.1		F-box/RNI-like superfamily protein	LOC_Os07g18560.1	OsFBLD6 - F-box, LRR and FBD domain containing protein, expressed	NA	NA	Bradi4g03086.1	Sobic.002G015600.1; Sobic.009G051800.1	Seita.2G014700.1; Seita.2G012900.1
Sevir.3G426600	Sevir.8G183800	0.0267919	undirected	0.41	0.59	1	0.62	0.89	0.41	0.07	0.19	0.15	0.26	0.12	0.1	NA	NA		S-receptor-like serine/threonine-protein kinase;Protein kinase, ATP binding site;Protein kinase-like domain;Serine/threonine-protein kinase, active site;Apple-like;Serine/threonine- / dual specificity protein kinase, catalytic domain;Bulb-type lectin domain;Protein kinase, catalytic domain;Concanavalin A-like lectin/glucanase, subgroup	AT5G35370.1		S-locus lectin protein kinase family protein	LOC_Os12g44320.1	carbohydrate binding protein, putative, expressed	Zm00001d031230_T001; Zm00001d020703_T001	AC195785.3_FGT004; GRMZM2G009166_T01	Bradi4g00206.1; Bradi3g57900.1	Sobic.008G192400.1; Sobic.002G224400.1	Seita.3G408600.1; Seita.1G332200.1
Sevir.8G101800	Sevir.8G183800	0.0267162	undirected	3.62	6.96	11.26	8.16	8.99	6.22	1.26	2.15	2.08	5.71	1.25	0.81	ADH2	ALCOHOL DEHYDROGENASE2	alcohol dehydrogenase 2-like	Alcohol dehydrogenase GroES-like;Alcohol dehydrogenase, C-terminal;GroES-like;Alcohol dehydrogenase, zinc-type, conserved site;NAD(P)-binding domain;Alcohol dehydrogenase superfamily, zinc-type	AT1G77120.1	ADH,ADH1,ATADH,ATADH1	alcohol dehydrogenase 1	LOC_Os11g10510.1	dehydrogenase, putative, expressed	Zm00001d049059_T001; Zm00001d033931_T002	GRMZM2G098346_T01; GRMZM2G442658_T06	Bradi4g22620.1; Bradi4g22610.1	Sobic.005G103300.1; Sobic.001G097600.1	Seita.8G099000.1; Seita.8G099100.1
Sevir.5G441400	Sevir.8G183800	0.0266516	undirected	74.01	187.22	252.52	190.46	185.41	93.35	12.11	15.72	42.62	26.9	34.27	21.78	NA	NA	NA	NA	AT3G04070.1	anac047,NAC047	NAC domain containing protein 47	LOC_Os01g70110.1	No apical meristem protein, putative, expressed	Zm00001d042288_T003; Zm00001d042288_T002	AC203535.4_FGT002; GRMZM2G134073_T01	NA	Sobic.003G409800.1	Seita.5G435400.1
Sevir.5G397800	Sevir.8G183800	0.026608	undirected	27.28	48.3	61.07	44.22	61.85	56.85	4.28	2.58	9.68	9.5	2.04	2.98	NA	NA	uricase-2-like	Uricase	AT2G26230.1		uricase / urate oxidase / nodulin 35, putative	LOC_Os01g64520.1	uricase, putative, expressed	Zm00001d042746_T003; Zm00001d042746_T002	GRMZM2G164141_T01	Bradi2g55950.2	Sobic.003G366400.1	Seita.5G392500.1
Sevir.9G055300	Sevir.8G183800	0.0262381	undirected	15.05	26.79	34.89	31.87	28.65	30.89	3.94	3.74	1.09	9.13	3.8	4.83	NA	NA	uncharacterized LOC101769052	Protein of unknown function DUF506, plant	AT2G38820.2		Protein of unknown function (DUF506)	LOC_Os03g58230.1	plant-specific domain TIGR01615 family protein, expressed	Zm00001d034444_T002; Zm00001d034444_T001	GRMZM2G080034_T02; GRMZM2G018992_T01	Bradi1g05500.1; Bradi1g55480.1	Sobic.001G057100.1; Sobic.001G495600.1	Seita.9G055800.1; Seita.2G057200.1
Sevir.3G023200	Sevir.8G183800	0.026008	undirected	0.05	2.08	5.53	2.88	2.59	1.75	0.07	1.08	0.72	0.45	0.78	0.75	NA	NA	ethylene-responsive transcription factor ERF003-like	DNA-binding, integrase-type;AP2/ERF domain;AP2/ERF transcription factor ERF/PTI6	AT5G25190.1		Integrase-type DNA-binding superfamily protein	LOC_Os04g56150.1	AP2 domain containing protein, expressed	Zm00001d026486_T001; Zm00001d002011_T001	GRMZM2G104260_T01; GRMZM2G067463_T01	Bradi1g47480.1; Bradi5g24720.1	Sobic.006G247000.1; Sobic.004G331300.2	Seita.3G021800.1; Seita.1G351800.1
Sevir.6G143000	Sevir.8G183800	0.0258129	undirected	0.04	0.25	0.67	0.32	0.5	0.45	0.03	0.09	0.3	0.12	0.14	0.16	NA	NA	NA	NA						NA	NA	NA	NA	Seita.6G138000.1
Sevir.5G220200	Sevir.8G183800	0.0257623	undirected	0.42	2.05	3.26	1.86	2.8	2.56	0.19	0.69	0.26	0.2	0.57	0.78	NA	NA	F-box/LRR-repeat protein At3g03360-like	FBD domain;F-box domain, cyclin-like	AT3G03030.1		F-box/RNI-like superfamily protein	LOC_Os01g41270.1	OsFBD3 - F-box and FBD domain containing protein, expressed	Zm00001d011276_T001; Zm00001d011276_T002	AC194341.4_FGT004	NA	Sobic.003G207300.1; Sobic.001G498700.1	Seita.5G213400.1
Sevir.8G146600	Sevir.8G183800	0.0255428	undirected	0.33	1.08	1.23	1.52	1.25	0.99	0.09	0.55	0.39	0.5	0.31	0.42	NA	NA	NA	NA						NA	NA	NA	NA	NA
Sevir.5G116100	Sevir.8G183800	0.025409	undirected	5.65	21.76	28.72	16.25	22.54	15.05	2.32	2.79	3.81	1.48	0.89	1.65	RA2	RAMOSA2	LOB domain-containing protein 6-like	Lateral organ boundaries, LOB	AT5G63090.1; AT5G63090.4	LOB; LOB	Lateral organ boundaries (LOB) domain family protein; Lateral organ boundaries (LOB) domain family protein	LOC_Os01g07480.1; LOC_Os01g07480.2	DUF260 domain containing protein, putative, expressed; DUF260 domain containing protein, putative, expressed	Zm00001d039694_T001; Zm00001d042560_T001	AC233943.1_FGT002; GRMZM2G118250_T03	Bradi2g04270.7; Bradi2g57380.2	Sobic.003G052900.1; Sobic.009G138500.1	Seita.5G119400.1; Seita.5G408700.1
Sevir.4G286200	Sevir.8G183800	0.0253692	undirected	0.05	0.19	0.64	0.49	0.4	0.11	0.11	0.17	0.41	0.13	0.5	0.22	NA	NA	peptidyl-prolyl cis-trans isomerase CYP19-4-like	Cyclophilin-type peptidyl-prolyl cis-trans isomerase;Cyclophilin-type peptidyl-prolyl cis-trans isomerase, conserved site;Cyclophilin-like peptidyl-prolyl cis-trans isomerase domain;Cyclophilin-like domain	AT2G29960.1	ATCYP5,CYP19-4,CYP5	cyclophilin 5	LOC_Os06g49470.1	peptidyl-prolyl cis-trans isomerase, putative, expressed	Zm00001d014732_T002; Zm00001d014732_T003	GRMZM2G084521_T03	NA	NA	Seita.4G274400.1
Sevir.9G304000	Sevir.8G183800	0.0253683	undirected	0.21	0.35	0.41	0.6	0.57	0.26	0.09	0.22	0.19	0.29	0.1	0.07	NA	NA		Major facilitator superfamily domain;Proton-dependent oligopeptide transporter family	AT2G02040.1; AT2G02040.1	ATPTR2,ATPTR2-B,NTR1,PTR2,PTR2-B; ATPTR2,ATPTR2-B,NTR1,PTR2,PTR2-B	peptide transporter 2; peptide transporter 2	LOC_Os10g02100.2; LOC_Os10g02100.1	peptide transporter PTR2, putative, expressed; peptide transporter PTR2, putative, expressed	Zm00001d030234_T001; Zm00001d030233_T001	GRMZM2G101576_T01; GRMZM5G826416_T01	NA	Sobic.001G276800.1; Sobic.001G276700.1	Seita.9G298100.1; Seita.9G298000.1
Sevir.5G383400	Sevir.8G183800	0.0252355	undirected	10.85	16.19	23.09	17.25	17.53	12.13	0.43	2.59	2.63	4.03	1.96	4.81	NA	NA	uncharacterized LOC101765296	DVL	AT2G39705.1	DVL11,RTFL8	ROTUNDIFOLIA like 8	LOC_Os01g62605.1	expressed protein	Zm00001d012414_T001; Zm00001d042900_T001	GRMZM2G035805_T01; GRMZM2G064948_T01	Bradi2g54750.1	Sobic.003G353300.1; Sobic.008G139400.1	Seita.5G378300.1; Seita.3G325200.1
Sevir.8G145300	Sevir.8G183800	0.0251165	undirected	142.31	263.85	334.04	196.58	341.24	236.65	20.94	36.64	29.09	40.46	3.68	32.79	NA	NA	auxin response factor 23-like	DNA-binding pseudobarrel domain;Auxin response factor;B3 DNA binding domain;AUX/IAA protein;Phox/Bem1p	AT5G62000.3	ARF1-BP,ARF2,HSS,ORE14	auxin response factor 2	LOC_Os11g32110.4	auxin response factor, putative, expressed	Zm00001d049295_T006; Zm00001d049295_T009	GRMZM2G378580_T01; GRMZM2G006042_T03	Bradi4g17410.1; Bradi3g45880.2	Sobic.005G132000.1; Sobic.008G096000.1	Seita.8G135700.1; Seita.5G438100.1
Sevir.7G155500	Sevir.8G183800	0.0250149	undirected	0.23	0.44	0.8	1.09	0.92	0.41	0.06	0.15	0.2	0.79	0.34	0.35	NA	NA	uncharacterized LOC101759272	Zinc finger, RING-type;Zinc finger, RING/FYVE/PHD-type	AT5G07040.1		RING/U-box superfamily protein	LOC_Os04g41070.1	zinc finger, C3HC4 type domain containing protein, expressed	NA	NA	NA	NA	Seita.7G147300.1
Sevir.3G395100	Sevir.8G183800	0.0249786	undirected	0.43	1.31	2.3	1.02	1.75	1.2	0.17	0.54	0.76	0.55	0.28	0.69	NA	NA		Ankyrin repeat-containing domain;Tetratricopeptide repeat;Tetratricopeptide repeat-containing domain;Ankyrin repeat;Tetratricopeptide-like helical	AT3G04710.3		ankyrin repeat family protein	LOC_Os12g40770.1	ankyrin-1, putative, expressed	NA	NA	Bradi4g06000.3	Sobic.008G155600.1; Sobic.008G155700.1	Seita.3G378300.1; Seita.3G378200.1
Sevir.6G213500	Sevir.8G183800	0.0249381	undirected	0.95	2.07	3.49	3.38	2.8	3.43	0.25	0.53	0.53	0.83	0.19	0.29	NA	NA	non-structural maintenance of chromosome element 4-like	Non-structural maintenance of chromosome element 4	AT1G51130.1		Nse4, component of Smc5/6 DNA repair complex	LOC_Os08g40010.1	expressed protein	NA	NA	NA	NA	Seita.6G206300.1
Sevir.9G482900	Sevir.8G183800	0.0247714	undirected	0.24	0.73	1.05	0.74	0.69	0.4	0.13	0.22	0.29	0.38	0.14	0.14	NA	NA		Chromo domain;Chromo domain, conserved site;DNA methylase, C-5 cytosine-specific, active site;Protein kinase, ATP binding site;Chromo domain-like;Protein kinase-like domain;Serine/threonine-protein kinase, active site;Serine/threonine- / dual specificity protein kinase, catalytic domain;C-5 cytosine methyltransferase;Serine-threonine/tyrosine-protein kinase catalytic domain;Bromo adjacent homolog…	AT1G69770.1	CMT3	chromomethylase 3	LOC_Os03g12570.1	expressed protein	NA	NA	Bradi1g68985.2	NA	Seita.9G479200.1
Sevir.5G460200	Sevir.8G183800	0.0243506	undirected	0.53	1.49	1.55	1.18	1.37	0.83	0.16	0.24	0.17	0.12	0.31	0.06	NA	NA	probable ADP-ribosylation factor GTPase-activating protein AGD11-like	Arf GTPase activating protein;C2 calcium-dependent membrane targeting	AT3G07940.1		Calcium-dependent ARF-type GTPase activating protein family	LOC_Os01g72230.1	stromal membrane-associated protein, putative, expressed	Zm00001d011855_T008; Zm00001d011855_T004	GRMZM2G109472_T03	Bradi2g60950.1	Sobic.003G427200.1	Seita.5G454000.1
Sevir.9G174800	Sevir.8G183800	0.0242191	undirected	1.32	1.7	3.53	2.63	2.06	1.87	0.28	0.05	0.79	0.69	0.33	0.4	NA	NA	myosin-2 heavy chain-like	Uncharacterised domain XH	AT4G00380.1		XH/XS domain-containing protein	LOC_Os05g06130.1	transcription factor X1, putative, expressed	NA	NA	NA	NA	Seita.9G176200.1
Sevir.9G096800	Sevir.8G183800	0.0241119	undirected	0.31	0.49	0.97	0.48	1.01	0.69	0.1	0.06	0.55	0.32	0.13	0.33	NA	NA		F-box domain, cyclin-like	AT3G22700.1		F-box and associated interaction domains-containing protein	LOC_Os01g07160.1	OsFBX3 - F-box domain containing protein, expressed	NA	NA	NA	NA	Seita.9G098600.1
Sevir.5G156800	Sevir.8G183800	0.0240536	undirected	0.12	0.31	0.34	0.5	0.43	0.26	0.09	0.16	0.09	0.21	0.13	0.07	NA	NA	NA	NA						NA	NA	NA	NA	NA
Sevir.2G051500	Sevir.8G183800	0.0240427	undirected	1.76	1.94	2.54	1.67	3.02	1.27	0.23	0.33	0.31	0.25	0.24	0.34	NA	NA	NA	NA						NA	NA	NA	NA	Seita.2G047400.1
Sevir.6G142900	Sevir.8G183800	0.024013	undirected	10.45	18.5	31.6	18.5	28.03	19.2	3.82	2.86	16.3	3.06	4.03	3.68	NA	NA		Ubiquitin subgroup;Ubiquitin domain;Ubiquitin-related domain	AT4G05320.4	UBQ10	polyubiquitin 10	LOC_Os06g46770.1	ubiquitin family protein, putative, expressed	Zm00001d015327_T001; Zm00001d015327_T003	GRMZM2G409726_T01; GRMZM2G419891_T05	Bradi1g32700.1; Bradi1g32860.3	Sobic.004G049900.1; Sobic.003G403700.1	Seita.6G137900.1; Seita.1G078800.1
Sevir.9G335800	Sevir.8G183800	0.0237886	undirected	13.44	24.08	28.38	18.55	30.24	21.1	3.4	5.71	6.44	3.77	2.93	2.85	NA	NA	scarecrow-like protein 6-like	Transcription factor GRAS	AT4G00150.1	ATHAM3,HAM3	GRAS family transcription factor	LOC_Os10g40390.1	scarecrow, putative, expressed	Zm00001d029855_T001; Zm00001d027292_T001	GRMZM2G079470_T01; GRMZM2G060265_T01	Bradi3g32890.1	Sobic.001G304500.1	Seita.9G330300.1
Sevir.7G198400	Sevir.8G183800	0.0234792	undirected	4.08	9.5	12.65	9.53	8.91	8.78	0.73	2.93	1.21	1.48	1.13	0.91	NA	NA	uncharacterized LOC101785585					LOC_Os04g46160.1	expressed protein	NA	NA	NA	Sobic.006G167100.1; Sobic.006G167000.1	Seita.2G156700.1; Seita.2G156800.1
Sevir.9G160300	Sevir.8G183800	0.0234374	undirected	37.98	61.39	85.41	54.52	76.27	56.52	10.43	8.49	5.05	15.85	9.38	10.36	NA	NA	uncharacterized LOC101767178	Pleckstrin-like, plant;Domain of unknown function DUF828	AT3G22810.1		Plant protein of unknown function (DUF828) with plant pleckstrin homology-like region	LOC_Os03g43510.1	expressed protein	Zm00001d033283_T001; Zm00001d013705_T001	GRMZM2G078178_T02; GRMZM5G815449_T01	Bradi1g14110.1; Bradi4g02467.1	Sobic.001G160200.1; Sobic.008G159400.2	Seita.9G162000.1; Seita.3G381300.1
Sevir.1G276600	Sevir.8G183800	0.0233321	undirected	40.55	67.24	80.97	76.92	87.92	84.79	12.12	14.26	5.99	16.11	12.73	20.36	NA	NA	growth-regulating factor 10-like	Glutamine-Leucine-Glutamine, QLQ;WRC domain;Growth-regulating factor	AT2G36400.1	AtGRF3,GRF3	growth-regulating factor 3	LOC_Os02g45570.2	growth regulating factor protein, putative, expressed	Zm00001d051456_T001; Zm00001d017602_T002	GRMZM2G045977_T01; GRMZM2G124566_T01	Bradi3g51685.1; Bradi5g18961.1	Sobic.004G282601.1	Seita.1G271800.1
Sevir.4G029300	Sevir.8G183800	0.023295	undirected	7.2	9.14	25.01	9.76	18.64	12.36	4.42	2.48	4.83	1.9	1.37	5.43	NA	NA	early nodulin-93-like	Early nodulin 93 ENOD93 protein	AT5G25940.1		early nodulin-related	LOC_Os06g04940.2	early nodulin 93 ENOD93 protein, putative, expressed	Zm00001d045391_T001; Zm00001d045390_T002	GRMZM2G147399_T01; GRMZM2G131421_T01	NA	Sobic.010G032100.1; Sobic.010G031100.1	Seita.4G030400.1; Seita.4G030300.1
Sevir.3G215900	Sevir.8G183800	0.0232563	undirected	1.53	6.62	9.23	4.47	7.62	5.61	0.37	0.87	0.42	1.25	1.15	0.47	NA	NA		Domain of unknown function DUF1618				LOC_Os05g16000.1	expressed protein	NA	NA	Bradi2g22710.1; Bradi5g23520.2	Sobic.009G168200.1; Sobic.009G168400.3	Seita.3G210700.1; Seita.3G210400.1
Sevir.5G374100	Sevir.8G183800	0.0231962	undirected	2.25	28.88	50.93	29.6	34.99	38.4	1.31	3.81	14.25	9.6	4.05	6.38	BA1/LAX1	BARREN STALK1	transcription factor LAX PANICLE-like	Myc-type, basic helix-loop-helix (bHLH) domain	AT5G01310.1	APTX	APRATAXIN-like	LOC_Os01g61480.1	helix-loop-helix DNA-binding domain containing protein, expressed	Zm00001d042989_T001; Zm00001d042988_T001	GRMZM2G397518_T01; GRMZM2G134735_T01	Bradi2g54030.1; Bradi4g32060.1	Sobic.003G344501.1; Sobic.007G155300.1	Seita.5G368600.1; Seita.6G180200.1
Sevir.7G218500	Sevir.8G183800	0.0226368	undirected	0.09	0.39	0.54	0.37	0.37	0.16	0.04	0.02	0.2	0.13	0.12	0.07	NA	NA	xyloglucan galactosyltransferase KATAMARI1 homolog	Exostosin-like	AT5G62220.1	ATGT18,GT18	glycosyltransferase 18	LOC_Os06g23420.2	exostosin family domain containing protein, expressed	Zm00001d026066_T001; Zm00001d002609_T001	GRMZM2G305146_T01; GRMZM2G303135_T01	Bradi5g18927.1	Sobic.006G186100.1; Sobic.006G186200.1	Seita.7G206700.1; Seita.7G206800.1
Sevir.3G249400	Sevir.8G183800	0.0225212	undirected	0.05	0.19	0.39	0.18	0.23	0.15	0.04	0.07	0.11	0.07	0.08	0.06	NA	NA	probable nitrite transporter At1g68570-like	Major facilitator superfamily domain;Proton-dependent oligopeptide transporter family	AT1G68570.1		Major facilitator superfamily protein	LOC_Os05g33960.1	peptide transporter PTR2, putative, expressed	Zm00001d038181_T001; Zm00001d038179_T001	GRMZM5G827496_T01; GRMZM2G042154_T01	Bradi2g25460.1; Bradi2g25430.1	Sobic.009G136700.1; Sobic.009G136500.1	Seita.3G243700.1; Seita.3G243800.1
Sevir.7G164300	Sevir.8G183800	0.0224605	undirected	0.6	1	1.55	1.2	1.17	0.45	0.12	0.27	0.26	0.37	0.29	0.22	NA	NA		Protein phosphatase 2C (PP2C)-like;Protein phosphatase 2C, manganese/magnesium aspartate binding site;Protein phosphatase 2C	AT4G31860.1		Protein phosphatase 2C family protein	LOC_Os04g42260.1	protein phosphatase 2C, putative, expressed	Zm00001d025780_T001	GRMZM2G109496_T05	NA	Sobic.006G137000.3; Sobic.006G073100.1	Seita.7G155900.1; Seita.1G226200.1
Sevir.2G043200	Sevir.8G183800	0.0223859	undirected	0.04	0.31	0.29	0.15	0.34	0.11	0.05	0.09	0.17	0.11	0.14	0.07	NA	NA	uncharacterized LOC101759267	Lateral organ boundaries, LOB	AT5G63090.4	LOB	Lateral organ boundaries (LOB) domain family protein	LOC_Os03g41600.1	DUF260 domain containing protein, putative, expressed	Zm00001d013625_T001; Zm00001d007919_T001	GRMZM2G079185_T01; AC207888.3_FGT009	NA	Sobic.002G039900.2; Sobic.003G383700.1	Seita.2G038300.1
Sevir.6G071700	Sevir.8G183800	0.0223334	undirected	1.97	5.85	8.48	6.29	5.69	6.12	0.9	1.41	1.47	3.86	1.38	1	NA	NA			AT3G21710.2			LOC_Os07g34020.1	expressed protein	Zm00001d024700_T001	GRMZM2G310453_T01	NA	Sobic.007G032300.1	Seita.6G072600.1
Sevir.5G434200	Sevir.8G183800	0.0223205	undirected	0.12	0.95	2.47	1.09	2.02	1.87	0.14	0.34	0.32	0.56	0.32	0.39	NA	NA	NA	NA	AT3G25030.1		RING/U-box superfamily protein	LOC_Os01g68900.1	zinc finger, C3HC4 type family protein, expressed	Zm00001d012045_T001; Zm00001d042359_T001	GRMZM2G082376_T01; GRMZM2G145374_T01	Bradi2g47230.1; Bradi2g58810.1	Sobic.003G402400.1	Seita.5G428300.1
Sevir.2G077300	Sevir.8G183800	0.0220731	undirected	0.21	0.21	1.52	0.46	0.82	0.35	0.25	0.21	0.6	0.33	0.62	0.36	NA	NA	NA	NA				LOC_Os03g51100.1	expressed protein	NA	NA	NA	NA	Seita.2G074400.1
Sevir.1G077400	Sevir.8G183800	0.0219159	undirected	67.92	110.97	145.07	95.83	147.9	111.74	9.64	5.79	43	22.9	20.92	16.25	NA	NA	NA	NA	AT4G05320.4; AT4G05320.4	UBQ10; UBQ10	polyubiquitin 10; polyubiquitin 10	LOC_Os06g46770.2; LOC_Os06g46770.1	ubiquitin family protein, putative, expressed; ubiquitin family protein, putative, expressed	Zm00001d015327_T001; Zm00001d053834_T002	GRMZM2G409726_T01; GRMZM2G118637_T01	Bradi3g04730.5; Bradi3g03957.2	Sobic.004G049900.1; Sobic.004G050100.1	Seita.1G078800.1; Seita.1G078900.1
Sevir.1G175300	Sevir.8G183800	0.021621	undirected	0.22	0.49	0.65	0.56	0.56	0.08	0.1	0.18	0.34	0.18	0.32	0.09	NA	NA	NA	NA						NA	NA	NA	NA	Seita.1G172600.1
Sevir.9G513700	Sevir.8G183800	0.0215737	undirected	0.33	0.84	1.13	0.82	0.93	0.16	0.16	0.27	0.24	0.43	0.2	0.11	NA	NA	ethylene-responsive transcription factor RAP2-4-like	DNA-binding, integrase-type;AP2/ERF domain	AT1G78080.1	RAP2.4	related to AP2 4	LOC_Os03g09170.1	ethylene-responsive transcription factor, putative, expressed	Zm00001d048208_T001; Zm00001d028017_T001	GRMZM2G113060_T01; GRMZM2G003466_T01	Bradi1g71740.1; Bradi4g29010.1	Sobic.001G473900.1; Sobic.004G233200.1	Seita.9G509400.1; Seita.2G188000.1
Sevir.2G059600	Sevir.8G183800	0.0214931	undirected	0.2	1.23	1.9	0.94	1.26	1.22	0.09	0.07	0.15	0.16	0.24	0.28	NA	NA		RNA recognition motif domain;Nucleotide-binding, alpha-beta plait	AT2G44710.1		RNA-binding (RRM/RBD/RNP motifs) family protein	LOC_Os07g08320.1	RNA recognition motif containing protein, expressed	NA	NA	NA	Sobic.002G053350.1	Seita.2G055200.1; Seita.8G057600.1
Sevir.2G247000	Sevir.8G183800	0.0211703	undirected	0.25	0.3	0.84	0.49	0.68	0.27	0.18	0.01	0.28	0.56	0.4	0.14	NA	NA	NA	NA						NA	NA	NA	NA	NA
Sevir.4G010200	Sevir.8G183800	0.0207282	undirected	0.39	2.51	3.22	1.72	2.23	1.53	0.24	0.36	0.46	0.37	0.38	0.52	NA	NA	uncharacterized LOC101754318	F-box domain, cyclin-like	AT1G65760.1		Protein of unknown function (DUF295)	LOC_Os06g02110.1	OsFBX182 - F-box domain containing protein, expressed	NA	NA	NA	Sobic.010G009700.1; Sobic.010G009800.1	Seita.4G010300.1; Seita.9G385800.1
Sevir.7G340200	Sevir.8G183800	0.0206038	undirected	0.13	0.23	0.77	0.43	0.44	0.45	0.15	0.21	0.39	0.33	0.35	0.34	NA	NA	uncharacterized LOC101777242	PC-Esterase;PMR5 N-terminal domain;Trichome birefringence-like family						Zm00001d052318_T002; Zm00001d052318_T001	GRMZM2G090728_T01	NA	Sobic.008G005200.1; Sobic.008G005100.2	Seita.7G331200.1; Seita.8G018900.1
Sevir.7G026300	Sevir.8G183800	0.0206001	undirected	0.06	0.3	0.4	0.23	0.29	0.24	0.06	0.09	0.1	0.11	0.12	0.09	NA	NA	putative F-box/FBD/LRR-repeat protein At1g78760-like	FBD domain;F-box domain, cyclin-like	AT5G53640.1			LOC_Os04g13160.1	OsFBD9 - F-box and FBD domain containing protein, expressed	NA	NA	NA	Sobic.006G022400.1; Sobic.006G234500.1	Seita.7G038900.1; Seita.7G039000.1
Sevir.1G165300	Sevir.8G183800	0.0205988	undirected	1.6	4.67	5.42	3.94	4.05	2.26	0.28	0.73	0.74	0.73	0.42	0.41	NA	NA		Peptidase S10, serine carboxypeptidase;Alpha/Beta hydrolase fold	AT5G09640.1	SCPL19,SNG2	serine carboxypeptidase-like 19	LOC_Os11g24510.1	OsSCP56 - Putative Serine Carboxypeptidase homologue, expressed	NA	NA	NA	NA	Seita.1G163000.1
Sevir.8G101900	Sevir.8G183800	0.0203046	undirected	19.28	34.5	40.9	25.78	42.42	24.23	1.64	8.67	4.98	11.11	10.97	3.05	ADH1	ALCOHOL DEHYDROGENASE1	alcohol dehydrogenase 1-like	Alcohol dehydrogenase GroES-like;Alcohol dehydrogenase, C-terminal;GroES-like;Alcohol dehydrogenase, zinc-type, conserved site;NAD(P)-binding domain;Alcohol dehydrogenase superfamily, zinc-type	AT1G77120.1	ADH,ADH1,ATADH,ATADH1	alcohol dehydrogenase 1	LOC_Os11g10480.1	dehydrogenase, putative, expressed	Zm00001d033931_T002; Zm00001d033931_T001	GRMZM2G442658_T06; GRMZM2G098346_T01	Bradi4g22630.2; Bradi4g22620.1	Sobic.001G097600.1; Sobic.005G103500.1	Seita.8G099100.1; Seita.8G099000.1
Sevir.1G101900	Sevir.8G183800	0.0202008	undirected	1.05	4.03	5.07	3.36	3.43	3.47	0.28	0.27	0.59	0.89	0.47	0.32	NA	NA	alkaline/neutral invertase CINV2-like	Glycosyl hydrolase family 100;Six-hairpin glycosidase-like	AT4G09510.1	CINV2	cytosolic invertase 2	LOC_Os02g03320.1	plant neutral invertase domain containing protein, expressed	Zm00001d015094_T002; Zm00001d015094_T001	GRMZM2G477236_T03; GRMZM5G869850_T01	Bradi3g02555.1	Sobic.004G024500.2; Sobic.002G298201.1	Seita.1G102700.1
