# Supplementary material for: The CLV3 Homolog in Setaria viridis Selectively Controls Inflorescence Meristem Size
Source: Front Plant Sci. 2021 Feb 15;12:636749. doi: 10.3389/fpls.2021.636749 (PMC7917188; doi:10.3389/fpls.2021.636749)
Supplement: Supplementary Table 1 — (Sheet 1) Expression of genes in the SvFon2(Sevir.8G183800) network with weight cutoff at 0.185, genes in Transcripts per Million (TPM) at six different stages of inflorescence development. Weight is a value quantifying the co-expression level of a gene pair generated by Weighted Gene Co-expression Network Analysis (WGCNA) in Zhu et al. (2018). For annotation, WikiGene.description and InterPro.description are from Biomart of EnsemblPlants. Best.hit.arabi.name, arabi.symbol, arabi.defline, Best.hit.rice.name and rice.defline are from the annotation file for the S. viridis genome (v1.1) from Phytozome v12.1. (Sheet 2) Expression of all genes directly associated with SvFon2 (Sevir.8G183800) in Transcripts per Million (TPM) at six different stages of inflorescence development. Genes were arranged by weight value quantifying the co-expression level of a gene pair generated by Weighted Gene Co-expression Network Analysis (WGCNA) in Zhu et al. (2018). For annotation, Short_name and Short_description are from classic maize genes. WikiGene.description and InterPro.description are from Biomart of EnsemblPlants. Best.hit.arabi.name, arabi.symbol, arabi.defline, Best.hit.rice.name and rice.defline are from the annotation file for the S. viridis genome (v1.1) from Phytozome v12.1. [file Table_1.XLSX]

## Sheet: raw read counts (TPM) of CLE ge
Table S1.	Total raw read counts (TPM) per replicate. Gene names are the same between S. viridis v.1 and v.2 genomes, except for Sevir.3G041960, which was Sevir.J013000 in v.1.
Gene_ID	10DAS_1	10DAS_2	10DAS_3	10DAS_4	12DAS_1	12DAS_2	12DAS_4	14DAS_1	14DAS_2	14DAS_3	14DAS_4	15DAS_1	15DAS_2	15DAS_3	15DAS_4	16DAS_1	16DAS_2	16DAS_3	16DAS_4	18DAS_1	18DAS_2	18DAS_3	18DAS_4	CLE group
Sevir.1G367300	20.1834	15.9231	18.3493	13.9172	23.7278	19.2463	20.8108	25.9546	28.2	26.8814	23.5546	36.2759	38.9381	40.5564	26.2622	36.5198	36.3086	37.3423	34.8306	32.3873	37.8479	36.0352	40.3543	2
Sevir.6G167300	0	8.59842	5.17366	0	2.40454	3.4521	0	0	0	0	2.68625	0	24.8974	3.0028	6.68891	6.69173	4.12844	0	3.61601	0	2.79684	7.09645	3.22536	1E1
Sevir.2G074300	1.92541	2.93573	2.79684	1.37528	1.98402	2.4555	1.35054	2.48507	1.94627	2.82516	2.06361	2.27493	1.77096	1.53785	0.856416	1.33276	1.99688	0.739948	0.925953	2.657	2.62602	1.1105	2.01891	1E1
Sevir.1G211000	3.38353	3.14168	5.04092	2.21629	1.52285	1.68177	1.61872	2.00238	2.02329	1.38211	2.22473	5.97271	3.63879	7.16811	7.16903	1.79301	4.22365	4.5249	4.22789	2.76216	6.54019	4.14863	4.24252	1E1
Sevir.7G132300	3.39397	3.26355	4.84652	1.74507	2.48551	2.0072	2.06994	2.07452	2.76204	3.02417	1.64867	4.30462	3.6191	6.30483	7.6704	3.1343	4.8009	4.20038	5.13945	6.57175	7.9503	6.18926	8.64749	1E1
Sevir.3G191400	10.0833	11.5428	11.5526	8.76769	6.71156	8.80962	8.4541	5.73621	7.14369	10.5582	6.06971	11.0524	12.4096	9.25947	12.8913	12.0962	11.4136	9.2836	8.74729	4.96486	10.7805	8.39466	10.8889	1E1
Sevir.9G131200	20.9444	26.0826	27.2308	15.0978	14.672	16.4009	18.1296	10.7689	8.6482	14.8661	13.3254	23.2144	18.9898	27.9032	22.6659	16.7534	18.5566	15.661	18.2744	12.5054	16.5446	14.2133	15.7744	1E1
Sevir.9G048500	24.2036	19.2615	21.7417	15.9316	18.7621	16.3854	18.189	19.9849	22.0603	22.5963	21.4578	21.4749	16.7175	26.0722	21.3725	23.3182	20.7427	20.9892	22.6892	9.03488	14.1818	15.445	12.7701	1E1
Sevir.9G389200	4.50766	3.67874	4.28285	2.7385	2.54557	2.85772	2.70146	3.06716	3.15025	3.2518	3.48527	9.24953	10.8007	9.27384	8.35906	5.64607	5.22499	4.61332	6.59124	4.08827	4.05173	5.11201	4.74954	1E2
Sevir.2G386900	0	7.25301	0	0	2.0283	2.91195	2.00198	0	0	0	0	0	0	2.53295	0	0	6.96492	3.13391	3.05021	2.8133	2.35921	11.9721	2.72068	1E3
Sevir.1G144900	0	0.0463124	0	0	0	0	0.0511328	0.0553455	0	0	0	0.344525	0.134101	0.129388	0.216165	0.144171	0	0.0800434	0.233717	0.0718548	0	0.305781	0.0694891	1A1	SvFOS1B
Sevir.3G241500	0.283092	0.0569524	0	0	0	0	0	0	0	0.0751645	0	0	0	0	0	0	0	0	0	0	0	0	0	1A1	SvFOS1A
Sevir.5G332200	0.166383	0.401676	0.60422	0.265652	0	0.161266	0	0.120005	0	0	0.125489	0	0	0	0.312473	0	0.385721	0.173558	0.168922	0	0.130655	0.165756	0.150673	1A3
Sevir.3G186700	0.65479	0.668786	0.804816	0.0804195	0.0680093	0.0976382	0.134254	0.0726573	0	0.160481	0.303908	0	0.352095	0	0	0.2839	0.116768	0.210161	0.102274	0.188661	0.237315	0.100357	0.18245	1A3
Sevir.1G253600	0	0	0	0	0	0	0.269786	0	0	0	0	0	0	0	0.190088	0	0	0	0	0.18956	0.158963	0	0	1B
Sevir.1G380900	0.871381	1.65287	1.44659	1.09314	0.672326	0.241308	0.663603	0.0897845	0.170771	0.991555	0.28166	0	0.217546	0.419801	0.233783	0.116941	0.288585	0	0.126383	2.33134	1.95504	0.496054	0.789103	1B
Sevir.9G250500	2.86076	1.93378	1.16355	1.46162	1.8541	0.776375	1.60129	1.81575	1.17736	0.54689	0.776746	61.4816	16.7982	18.4268	12.6794	5.15988	5.70354	4.53586	9.99121	1.07154	1.97688	4.90195	6.63205	1B
Sevir.7G187900	16.0996	9.71674	1.46164	8.03281	9.51048	15.6044	5.36405	11.612	13.8038	11.2209	6.07126	6.0237	0	5.09002	0	11.3431	11.6635	4.19845	6.12948	7.53788	4.7409	8.01943	9.11214	1B
Sevir.9G396500	0	0	0	0	0	0	0	0	0.126504	0	0	0	0	0	0	0	0	0	0	0	0	0	0	1C
Sevir.9G457700	0.111871	0	0	0.0893079	0.302104	0.325289	0	0.0806879	0.0767348	0.0891095	0.253124	0.167427	0	0.188634	0.105049	0	0	0.116695	0	0	0	0	0	1C
Sevir.4G258500	1.45041	2.12593	1.90621	1.26816	3.54378	2.20911	2.94551	4.28413	4.97436	5.28142	4.68824	3.20437	1.81053	2.62035	2.65907	2.9846	2.56187	2.59364	2.59449	3.55713	3.03721	4.81648	4.31566	1C
Sevir.3G101900	1.53775	1.3726	1.39766	1.32676	2.18497	1.69561	1.71183	1.2661	1.31996	1.04511	0.857635	1.96365	3.56517	0.601175	0.415325	1.90322	1.52086	0.912428	0.88806	4.7507	3.0889	2.70138	3.98251	1C
Sevir.1G086000	2.70627	1.76945	1.47417	1.08022	15.9867	11.585	8.11505	10.8982	15.6238	11.3171	10.8859	6.07534	1.57649	2.6619	1.48238	4.44903	2.61411	3.5287	2.28964	2.74535	3.18769	2.02204	4.08456	1C
Sevir.5G117500	2.7876	3.19662	1.82217	1.66903	2.54065	1.8913	1.76467	2.11111	2.10329	2.99758	1.15635	3.75476	3.41012	2.82024	3.27201	2.74964	3.06965	3.92554	3.25467	5.09015	2.51735	4.16563	3.91281	1C
Sevir.3G024600	5.5253	3.74307	5.24149	4.23087	4.79601	5.68322	4.73378	4.0665	3.48054	4.94002	2.63643	3.71271	5.32065	2.9471	2.43535	2.75416	3.79045	2.82296	3.43446	10.4534	7.70359	6.40314	10.0072	1C
Sevir.8G183800	0.457055	0	1.99175	1.45949	3.70279	0	5.48213	5.93379	8.15111	4.36874	8.27321	6.84033	9.58497	6.16541	5.15018	7.72853	6.35746	5.72116	11.1367	3.42391	2.87126	0.910662	5.79458	1D3	SvFON2
Sevir.7G142950.1	0	0.856332	0	0.994301	0	1.18683	0	1.29482	1.28406	1.03145	1.43661	5.36248	6.33705	6.37346	1.64595	0.873278	2.15404	3.86126	3.73566	0.836772	4.78375	3.51661	2.27298	1D4	SvFCP1
Sevir.4G139000	0	0	0	0	0	0	0	0	0	0	0	0	0	0	0	0	0	0	0	0	0	0	0	1F	SvFCP2
Sevir.3G041960	0.110706	0	0	0	0.298957	0	0.147539	0.31939	0	0.176362	0.333983	0.662733	0	0	0	0.415993	0	0.230958	0.22479	0	0.347732	0.220576	0	1I
Sevir.5G086600	0.916903	0.402464	0.363243	0.266173	0	0	0	0.120241	0	0	0	0	0	0	0.156543	0	0	0	0	0	0	0.166081	0	1J
Sevir.5G177800	4.10668	3.64973	2.75324	2.37775	8.10422	5.24883	6.49549	9.76477	8.35774	11.3591	9.73443	6.4838	9.93714	5.32662	3.05109	6.44391	6.06795	6.40211	3.57373	5.07103	4.46514	4.67565	4.4954	1J
Sevir.3G184100	0	0	0	0	0	0	0	0	0	0	0	0	0	0	0	0	0	0	0	0	0	0	0	3A
Sevir.5G325600	0	0	0	0	0	0	0	0	0	0	0	0	0	0	0	0	0	0	0	0	0	0	0	3A
Sevir.1G016400	0	0	0	0	0	0	0	0	0	0	0	0	0	0	0	0	0	0	0	0	0	0	0	3B
Sevir.3G184200	0	0	0	0	0	0	0	0	0	0	0	0	0	0	6.71956	0	0	0	0	0	0	0	0	3B
Sevir.4G067100	0	0	0	0	0	3.4521	0	0	0	0	0	0	0	0	0	0	0	0	0	0	0	0	0	3B
Sevir.5G269600	0	0	0	0	0	0	0	0	0	0	0	0	0	0	0	0	0	0	0	0	0	0	0	3B
Sevir.5G325800	0	0	0	0	0	0	0	0	0	0	0	0	0	0	0	0	0	0	0	0	0	0	0	3B
Sevir.4G139300	0.049837	0.120315	0.0723931	0	0	0.0966081	0.0664186	0	0	0	0	0	0	0	0	0	0	0	0	0	0	0	0	3B
Sevir.5G325900	0.644105	0.11107	0.400983	0.881481	0.496968	0.713478	0.73578	0.3982	0.12623	0.293174	0.555192	0.550843	0.32161	3.56854	2.59211	0.864401	0.213316	2.30359	1.86839	0	2.02317	0.733344	1.16657	3B
Sevir.3G150300	9.05602	6.07297	4.38492	3.21312	1.35864	0	0	0	1.38038	0	0	3.01185	3.51695	8.48337	3.77944	1.89052	2.3327	0	2.04316	1.88447	1.5803	4.00971	0	3B
Sevir.5G159500	14.2259	11.4031	11.8659	7.27538	23.5602	16.1582	14.6637	20.6012	22.9462	23.017	20.2014	25.1163	31.0764	25.8614	15.5499	16.2873	17.005	18.6651	15.2328	17.0678	15.4475	19.9297	19.6259	ungrouped
		not displayed in figure	Sevir.5G117500		one value 5.09, all others lower
			Sevir.3G184200		one value 6.72, all others zero
			Sevir.4G258500		one value 5.28, all others lower

## Sheet: SvCLEs_inflorescence expression
Table S1 Sheet 1: Expression of all Setaria CLE genes during early inflorescence development. Group and gene data are from Goad et al. (2017). Expression data are from Zhu et al. (2018). Expression is quantified in Transcripts per Million (TPM). The six sequential stages represent initiation of the IM (10 days after sowing; DAS), primary and secondary (12 DAS) and higher order (14 DAS) branching …
		Mean expression value (TPM) at different stages						Standard deviation (SD) at different stages
Group	Gene name v.1	10DAS	12DAS	14DAS	15DAS	16DAS	18DAS	10DAS_SD	12DAS_SD	14DAS_SD	15DAS_SD	16DAS_SD	18DAS_SD	Notes
1A1	Sevir.1G144900	0.01	0.02	0.01	0.21	0.11	0.11	0.02	0.03	0.03	0.1	0.1	0.13	SvFOS1B
1A1	Sevir.3G241500	0.09	0	0.02	0	0	0	0.13	0	0.04	0	0	0	SvFOS1A
1A3	Sevir.3G186700	0.55	0.1	0.13	0.09	0.18	0.18	0.32	0.03	0.13	0.18	0.09	0.06	unkonwn function
1A3	Sevir.5G332200	0.36	0.05	0.06	0.08	0.18	0.11	0.19	0.09	0.07	0.16	0.16	0.08	unkonwn function
1B	Sevir.1G253600	0	0.09	0	0.05	0	0.09	0	0.16	0	0.1	0	0.1	unkonwn function
1B	Sevir.1G380900	1.27	0.53	0.38	0.22	0.13	1.39	0.35	0.25	0.41	0.17	0.12	0.89	unkonwn function
1B	Sevir.7G187900	8.83	10.16	10.68	2.78	8.33	7.35	6.02	5.15	3.27	3.23	3.75	1.86	unkonwn function
1B	Sevir.9G250500	1.85	1.41	1.08	27.35	6.35	3.65	0.74	0.56	0.56	22.88	2.48	2.58	unkonwn function
1C	Sevir.1G086000	1.76	11.9	12.18	2.95	3.22	3.01	0.69	3.95	2.3	2.15	0.97	0.86	unkonwn function
1C	Sevir.3G024600	4.69	5.07	3.78	3.6	3.2	8.64	0.84	0.53	0.97	1.26	0.5	1.92	unkonwn function
1C	Sevir.3G101900	1.41	1.86	1.12	1.64	1.31	3.63	0.09	0.28	0.21	1.46	0.49	0.92	unkonwn function
1C	Sevir.4G258500	1.69	2.9	4.81	2.57	2.68	3.93	0.4	0.67	0.42	0.57	0.2	0.79	unkonwn function
1C	Sevir.5G117500	2.37	2.07	2.09	3.31	3.25	3.92	0.74	0.42	0.75	0.39	0.5	1.06	unkonwn function
1C	Sevir.9G396500	0	0	0.03	0	0	0	0	0	0.06	0	0	0	unkonwn function
1C	Sevir.9G457700	0.05	0.21	0.12	0.12	0.03	0	0.06	0.18	0.09	0.08	0.06	0	unkonwn function
1D3	Sevir.8G183800	0.98	3.06	6.68	6.94	7.74	3.25	0.91	2.8	1.88	1.9	2.42	2.01	SvFON2
1D4	Sevir.7G142950	0.46	0.4	1.26	4.93	2.66	2.85	0.46	0.56	0.15	1.94	1.23	1.46	SvFCP1
1E1	Sevir.2G074300	2.26	1.93	2.33	1.61	1.25	2.1	0.74	0.55	0.4	0.59	0.56	0.72	pollen tube elongation, protophloem development
1E1	Sevir.3G191400	10.49	7.99	7.38	11.4	10.39	8.76	1.34	1.12	2.2	1.63	1.62	2.78	pollen tube elongation, protophloem development
1E1	Sevir.9G048500	20.28	17.78	21.52	21.41	21.93	12.86	3.53	1.24	1.13	3.82	1.26	2.77	pollen tube elongation, protophloem development
1E1	Sevir.9G131200	22.34	16.4	11.9	23.19	17.31	14.76	5.55	1.73	2.75	3.66	1.36	1.79	pollen tube elongation, protophloem development
1E2	Sevir.1G211000	3.45	1.61	1.91	5.99	3.69	4.42	1.18	0.08	0.36	1.66	1.27	1.57	pollen tube elongation, protophloem development
1E2	Sevir.6G167300	3.44	1.95	0.67	8.65	3.61	3.28	4.21	1.77	1.34	11.17	2.76	2.92	pollen tube elongation, protophloem development
1E2	Sevir.7G132300	3.31	2.19	2.38	5.47	4.32	7.34	1.27	0.26	0.63	1.85	0.88	1.15	pollen tube elongation, protophloem development
1E2	Sevir.9G389200	3.8	2.7	3.24	9.42	5.52	4.5	0.79	0.16	0.18	1.01	0.83	0.52	pollen tube elongation, protophloem development
1E3	Sevir.2G386900	1.81	2.31	0	0.63	3.29	4.97	3.63	0.52	0	1.27	2.85	4.67	pollen tube elongation, protophloem development
1F	Sevir.4G139000	0	0	0	0	0	0	0	0	0	0	0	0	ESR/SvFCP2
1I	Sevir.3G041960	0.03	0.15	0.21	0.17	0.22	0.14	0.06	0.15	0.16	0.33	0.17	0.17
1J	Sevir.5G086600	0.49	0	0.03	0.04	0	0.04	0.29	0	0.06	0.08	0	0.08
1J	Sevir.5G177800	3.22	6.62	9.8	6.2	5.62	4.68	0.8	1.43	1.23	2.87	1.38	0.28
2	Sevir.1G367300	17.09	21.26	26.15	35.51	36.25	36.66	2.74	2.27	1.96	6.41	1.05	3.35	vascular development
3A	Sevir.3G184100	0	0	0	0	0	0	0	0	0	0	0	0	unknown function in grasses, nodulation in soybean
3A	Sevir.5G325600	0	0	0	0	0	0	0	0	0	0	0	0	unknown function in grasses, nodulation in soybean
3B	Sevir.1G016400	0	0	0	0	0	0	0	0	0	0	0	0	unknown function in grasses, nodulation in soybean
3B	Sevir.3G150300	5.68	0.45	0.35	4.7	1.57	1.87	2.54	0.78	0.69	2.54	1.06	1.65	unknown function in grasses, nodulation in soybean
3B	Sevir.3G184200	0	0	0	1.68	0	0	0	0	0	3.36	0	0	unknown function in grasses, nodulation in soybean
3B	Sevir.4G067100	0	1.15	0	0	0	0	0	1.99	0	0	0	0	unknown function in grasses, nodulation in soybean
3B	Sevir.4G139300	0.06	0.05	0	0	0	0	0.05	0.05	0	0	0	0	unknown function in grasses, nodulation in soybean
3B	Sevir.5G269600	0	0	0	0	0	0	0	0	0	0	0	0	unknown function in grasses, nodulation in soybean
3B	Sevir.5G325800	0	0	0	0	0	0	0	0	0	0	0	0	unknown function in grasses, nodulation in soybean
3B	Sevir.5G325900	0.51	0.65	0.34	1.76	1.31	0.98	0.33	0.13	0.18	1.58	0.95	0.85	unknown function in grasses, nodulation in soybean
ungrouped	Sevir.5G159500	11.19	18.13	21.69	24.4	16.8	18.02	2.89	4.76	1.5	6.47	1.44	2.14
