# Supplementary material for: The CLV3 Homolog in Setaria viridis Selectively Controls Inflorescence Meristem Size
Source: Front Plant Sci. 2021 Feb 15;12:636749. doi: 10.3389/fpls.2021.636749 (PMC7917188; doi:10.3389/fpls.2021.636749)
Supplement: Supplementary Table 2 — (Sheet 1) Expression of genes homologous to known leucine rich receptors in Transcripts per Million (TPM) at six different stages of inflorescence development. For annotation, WikiGene.description and InterPro.description are from Biomart of EnsemblPlants. Best.hit.arabi.name, arabi.symbol, arabi.defline, Best.hit.rice.name and rice.defline are from the annotation file for the S. viridis genome (v1.1) from Phytozome v12.1. Genes were arranged by their expression value, highest to lowest for the sum of expression across six stages. (Sheet 2) Expression of leucine rich receptors and WOX genes that are coexpressed with SvFon2 (Sevir.8G183800). Weight is a value quantifying the co-expression level of a gene pair generated by Weighted Gene Co-expression Network Analysis (WGCNA) in Zhu et al. (2018). Expression of genes in Transcripts per Million (TPM) at six different stages of inflorescence development. For annotation, WikiGene.description and InterPro.description are from Biomart of EnsemblPlants. Best.hit.arabi.name, arabi.symbol, arabi.defline, Best.hit.rice.name and rice.defline are from the annotation file for the S. viridis genome (v1.1) from Phytozome v12.1. Genes were arranged by their weight value, starting with those whose expression is most closely correlated with SvFON2. (Sheet 3) Expression of genes homologous to known leucine rich receptors (LRR) in Transcripts per Million (TPM) at six different stages of inflorescence development. For annotation, WikiGene.description and InterPro.description are from Biomart of EnsemblPlants. Best.hit.arabi.name, arabi.symbol, arabi.defline, Best.hit.rice.name and rice.defline are from the annotation file for the S. viridis genome (v1.1) from Phytozome v12.1. Genes were arranged by their expression value, highest to lowest for the sum of expression across six stages. (Sheet 4) Expression of WUS/WOX genes in Transcripts per Million (TPM) at six different stages of inflorescence development. For annotation, WikiGene.descrip [file Table_3.XLSX]

## Sheet: homolog of known LRR receptors
TableS3 sheet1: Expression of genes homologous to known leucine rich receptors in Transcripts per Million (TPM) at six different stages of inflorescence development. For annotation, WikiGene.description and InterPro.description are from Biomart of EnsemblPlants. Best.hit.arabi.name, arabi.symbol, arabi.defline, Best.hit.rice.name and rice.defline are from the annotation file for the S. viridis ge…
	Mean expression value (TPM) at different stages of inflorescence development						Standard deviation of expression value (TPM) at different stages of inflorescence development							Gene annotation							Homologs in grasses
Gene	10DAS	12DAS	14DAS	15DAS	16DAS	18DAS	10DAS_SD	12DAS_SD	14DAS_SD	15DAS_SD	16DAS_SD	18DAS_SD	homolog of	WikiGene.description	InterPro.description	Best.hit.arabi.name	arabi.symbol	arabi.defline	Best.hit.rice.name	rice.defline	Maizev4.gene	Zmays_284.gene	Bradi.gene	Sobic.gene	Seita.gene
Sevir.4G085800	134.67	199.16	263.69	271.74	393.46	245.6	9.66	11.53	31.33	20.27	16.5	22.28	ER	LRR receptor-like serine/threonine-protein kinase ERECTA-like	Protein kinase, ATP binding site;Leucine-rich repeat-containing N-terminal, type 2;Protein kinase-like domain;Serine/threonine-protein kinase, active site;Leucine-rich repeat, typical subtype;Serine/threonine- / dual specificity protein kinase, catalytic domain;Leucine-rich repeat;Protein kinase, catalytic domain	AT2G26330.1	ER,QRP1	Leucine-rich receptor-like protein kinase family protein	LOC_Os06g10230.1	receptor-like protein kinase 5 precursor, putative, expressed	Zm00001d037114_T002; Zm00001d037114_T012	GRMZM5G809695_T03; GRMZM2G463904_T03	Bradi1g46450.1	Sobic.010G077000.1; Sobic.004G317200.1	Seita.4G086700.1
Sevir.1G345500	73.1	75.41	78.34	102.97	127.02	118.11	2.52	9.25	5.76	7.64	9.43	10.15	ER	LRR receptor-like serine/threonine-protein kinase ERECTA-like	Protein kinase, ATP binding site;Leucine-rich repeat-containing N-terminal, type 2;Protein kinase-like domain;Serine/threonine-protein kinase, active site;Leucine-rich repeat, typical subtype;Serine/threonine- / dual specificity protein kinase, catalytic domain;Leucine-rich repeat;Protein kinase, catalytic domain	AT2G26330.1	ER,QRP1	Leucine-rich receptor-like protein kinase family protein	LOC_Os06g10230.1	receptor-like protein kinase 5 precursor, putative, expressed	Zm00001d018261_T002; Zm00001d018261_T007	GRMZM2G463904_T03; GRMZM5G809695_T03	Bradi1g46450.1	Sobic.004G317200.1	Seita.1G338900.1
Sevir.4G019500	103.55	94.81	86.58	95.73	136.9	130.9	11.09	2.31	8.69	8.29	6.41	10.97	ERL1	LRR receptor-like serine/threonine-protein kinase ERL2-like	Protein kinase, ATP binding site;Leucine-rich repeat-containing N-terminal, type 2;Protein kinase-like domain;Serine/threonine-protein kinase, active site;Leucine-rich repeat, typical subtype;Serine/threonine- / dual specificity protein kinase, catalytic domain;Leucine-rich repeat;Protein kinase, catalytic domain;Concanavalin A-like lectin/glucanase, subgroup	AT5G62230.1	ERL1	ERECTA-like 1	LOC_Os06g03970.1	receptor-like protein kinase 5 precursor, putative, expressed	Zm00001d045481_T006; Zm00001d045481_T004	GRMZM2G082855_T03	Bradi1g49950.1	Sobic.010G020600.1	Seita.4G019700.1
Sevir.5G117600	56.53	61.15	62.02	61.31	62.86	60.22	6.49	6.87	6.09	9.73	6.77	6.41	CIK1	protein NSP-INTERACTING KINASE 3-like	Protein kinase, ATP binding site;Leucine-rich repeat-containing N-terminal, type 2;Protein kinase-like domain;Serine/threonine-protein kinase, active site;Serine/threonine- / dual specificity protein kinase, catalytic domain;Leucine-rich repeat;Serine-threonine/tyrosine-protein kinase catalytic domain;Protein kinase, catalytic domain;Concanavalin A-like lectin/glucanase, subgroup	AT1G60800.1	NIK3	NSP-interacting kinase 3	LOC_Os01g07630.1	BRASSINOSTEROID INSENSITIVE 1-associated receptor kinase 1 precursor, putative, expressed	Zm00001d039678_T003; Zm00001d008724_T005	GRMZM2G010693_T01; GRMZM2G067675_T01	Bradi2g04420.1; Bradi1g51630.1	Sobic.003G051100.1	Seita.5G121100.1
Sevir.9G484200	30.24	47.02	64.11	54.51	98.63	53.48	7.15	6.54	14.08	9.98	10.51	6.33	BAM2	leucine-rich repeat receptor-like serine/threonine-protein kinase BAM2-like	Protein kinase, ATP binding site;Leucine-rich repeat-containing N-terminal, type 2;Protein kinase-like domain;Serine/threonine-protein kinase, active site;Leucine-rich repeat, typical subtype;Serine/threonine- / dual specificity protein kinase, catalytic domain;Leucine-rich repeat;Protein kinase, catalytic domain	AT3G49670.1	BAM2	Leucine-rich receptor-like protein kinase family protein	LOC_Os03g12730.1	receptor protein kinase CLAVATA1 precursor, putative, expressed	Zm00001d028317_T001; Zm00001d018752_T001	GRMZM2G043584_T01; GRMZM2G141517_T01	Bradi1g69097.1; Bradi1g30160.1	Sobic.001G446400.1; Sobic.005G091000.1	Seita.9G480700.1; Seita.2G026900.1
Sevir.9G072100	39.11	44.85	48.5	42.41	71.02	53.79	1.68	2.47	3.65	7.12	1.53	2.97	BAM1	leucine-rich repeat receptor-like serine/threonine-protein kinase BAM1-like	Leucine-rich repeat-containing N-terminal, type 2;Protein kinase-like domain;Serine/threonine-protein kinase, active site;Leucine-rich repeat, typical subtype;Serine/threonine- / dual specificity protein kinase, catalytic domain;Leucine-rich repeat;Protein kinase, catalytic domain	AT5G65700.2	BAM1	Leucine-rich receptor-like protein kinase family protein	LOC_Os03g56270.2	receptor protein kinase CLAVATA1 precursor, putative, expressed	Zm00001d013162_T001; Zm00001d034240_T002	GRMZM2G072569_T01; GRMZM2G141517_T01	Bradi1g07180.1; Bradi1g57900.2	Sobic.001G074000.1; Sobic.002G027600.3	Seita.9G073200.1; Seita.2G026900.1
Sevir.2G031700	23.83	26.37	31.03	34.58	61.31	45.14	2	0.63	2.43	6.44	2.96	1.98	BAM1	leucine-rich repeat receptor-like serine/threonine-protein kinase BAM1-like	Leucine-rich repeat-containing N-terminal, type 2;Protein kinase-like domain;Serine/threonine-protein kinase, active site;Leucine-rich repeat, typical subtype;Serine/threonine- / dual specificity protein kinase, catalytic domain;Leucine-rich repeat;Protein kinase, catalytic domain;Concanavalin A-like lectin/glucanase, subgroup	AT5G65700.2	BAM1	Leucine-rich receptor-like protein kinase family protein	LOC_Os07g04190.1	receptor protein kinase CLAVATA1 precursor, putative, expressed	Zm00001d018752_T001; Zm00001d034240_T002	GRMZM2G141517_T01; GRMZM2G072569_T01	Bradi1g57900.2; Bradi1g07180.1	Sobic.002G027600.3; Sobic.005G091000.1	Seita.2G026900.1; Seita.9G073200.1
Sevir.5G444600	27.54	30.09	30.86	30.59	42.57	23.91	2.93	2.01	1.28	2.05	1.9	3.98	CRN	inactive leucine-rich repeat receptor-like protein kinase CORYNE-like	Protein kinase-like domain;Protein kinase, catalytic domain	AT5G13290.2	CRN,SOL2	Protein kinase superfamily protein	LOC_Os01g70260.1	receptor-like protein kinase 2 precursor, putative, expressed	Zm00001d042268_T001	GRMZM2G032132_T01	Bradi2g59470.1	Sobic.003G411800.1	Seita.5G438000.1
Sevir.6G170900	28.18	18.34	21.87	34.71	41.18	40.35	4.29	1.79	1.55	2.84	1.4	4.43	CIK2	probable LRR receptor-like serine/threonine-protein kinase At2g23950-like	Protein kinase, ATP binding site;Leucine-rich repeat-containing N-terminal, type 2;Protein kinase-like domain;Serine/threonine-protein kinase, active site;Serine/threonine- / dual specificity protein kinase, catalytic domain;Leucine-rich repeat;Serine-threonine/tyrosine-protein kinase catalytic domain;Protein kinase, catalytic domain;Concanavalin A-like lectin/glucanase, subgroup	AT2G23950.1		Leucine-rich repeat protein kinase family protein	LOC_Os08g34380.1	receptor-like kinase, putative, expressed	Zm00001d032142_T003; Zm00001d032142_T001	GRMZM2G151955_T01; GRMZM2G349665_T04	Bradi3g36797.6	Sobic.007G142900.1	Seita.6G164900.1
Sevir.8G086600	16.23	13.17	18.25	24.27	39	29.05	3.56	1.99	1.02	2.81	3.67	4.1	BAM1	leucine-rich repeat receptor-like serine/threonine-protein kinase BAM1-like	Leucine-rich repeat-containing N-terminal, type 2;Protein kinase-like domain;Serine/threonine-protein kinase, active site;Leucine-rich repeat, typical subtype;Serine/threonine- / dual specificity protein kinase, catalytic domain;Leucine-rich repeat;Protein kinase, catalytic domain	AT5G65700.1	BAM1	Leucine-rich receptor-like protein kinase family protein	LOC_Os11g12620.1	receptor protein kinase CLAVATA1 precursor, putative, expressed	Zm00001d007254_T001; Zm00001d048968_T001	GRMZM2G169681_T01; GRMZM2G068398_T01	Bradi4g21830.1; Bradi1g30160.1	Sobic.005G091000.1; Sobic.001G446400.1	Seita.8G084800.1; Seita.4G281800.1
Sevir.5G073000	13.75	14.94	15.55	16.83	20.58	44.02	2.22	1.36	0.85	1.77	0.64	10.1	FEA3	piriformospora indica-insensitive protein 2-like	Leucine-rich repeat, typical subtype;Leucine-rich repeat	AT1G13230.1; AT1G68780.1	;	Leucine-rich repeat (LRR) family protein; RNI-like superfamily protein	LOC_Os01g02060.1; LOC_Os01g02060.2	TOO MANY MOUTHS precursor, putative, expressed; TOO MANY MOUTHS precursor, putative, expressed	Zm00001d040130_T001	GRMZM2G166524_T02	NA	Sobic.003G100200.1; Sobic.003G100400.1	Seita.5G074400.1
Sevir.3G120800	13.88	13.14	16.2	20.46	35.39	22.29	3.09	2.11	1.55	3.48	2.71	3.59	BAM3	leucine-rich repeat receptor-like serine/threonine-protein kinase BAM3-like	Leucine-rich repeat-containing N-terminal, type 2;Protein kinase-like domain;Serine/threonine-protein kinase, active site;Leucine-rich repeat, typical subtype;Serine/threonine- / dual specificity protein kinase, catalytic domain;Leucine-rich repeat;Protein kinase, catalytic domain	AT4G20270.1	BAM3	Leucine-rich receptor-like protein kinase family protein	LOC_Os05g51740.1	receptor protein kinase CLAVATA1 precursor, putative, expressed	Zm00001d039218_T002; Zm00001d039218_T001	GRMZM2G052111_T01; GRMZM2G068398_T01	Bradi1g69097.1; Bradi1g30160.1	Sobic.009G259500.1; Sobic.001G446400.1	Seita.3G118800.1; Seita.9G480700.1
Sevir.9G086000	11.29	12.91	15.68	23.97	23.84	18.78	1.13	1.4	1.81	4.02	0.87	1.39	RPK2	LRR receptor-like serine/threonine-protein kinase RPK2-like	Protein kinase, ATP binding site;Leucine-rich repeat-containing N-terminal, type 2;Protein kinase-like domain;Serine/threonine-protein kinase, active site;Leucine-rich repeat, typical subtype;Serine/threonine- / dual specificity protein kinase, catalytic domain;Leucine-rich repeat;Protein kinase, catalytic domain;Concanavalin A-like lectin/glucanase, subgroup	AT3G02130.1	RPK2,TOAD2	receptor-like protein kinase 2	LOC_Os03g54900.1	phytosulfokine receptor precursor, putative, expressed	Zm00001d013251_T001	GRMZM2G072658_T01; GRMZM2G372117_T01	Bradi1g08240.1	Sobic.001G085300.1	Seita.9G087600.1
Sevir.1G023600	12.21	13.83	14.58	20.1	18.71	16.27	0.71	0.87	1.11	2.57	0.87	0.78	CIK4	probable LRR receptor-like serine/threonine-protein kinase At5g45780-like	Protein kinase, ATP binding site;Leucine-rich repeat-containing N-terminal, type 2;Protein kinase-like domain;Serine/threonine-protein kinase, active site;Serine/threonine- / dual specificity protein kinase, catalytic domain;Leucine-rich repeat;Protein kinase, catalytic domain;Concanavalin A-like lectin/glucanase, subgroup	AT5G45780.1		Leucine-rich repeat protein kinase family protein	LOC_Os02g14120.1	BRASSINOSTEROID INSENSITIVE 1-associated receptor kinase 1 precursor, putative, expressed	Zm00001d016197_T001; Zm00001d037840_T001	GRMZM2G146794_T02; GRMZM2G136161_T01	Bradi3g09060.2	Sobic.004G104800.1; Sobic.003G051100.1	Seita.1G023400.1
Sevir.1G227500	12.86	15.23	16.55	10.01	14.63	10.69	0.25	2.58	0.96	1.76	1.07	1.31	CLV2/FEA2	leucine-rich repeat receptor-like protein FASCIATED EAR2-like	Leucine rich repeat 4;Leucine-rich repeat-containing N-terminal, type 2;Leucine-rich repeat, typical subtype;Leucine-rich repeat	AT1G65380.1	AtRLP10,CLV2	Leucine-rich repeat (LRR) family protein	LOC_Os02g39100.1	fasciated ear2, putative, expressed	Zm00001d051012_T001	GRMZM2G104925_T01	Bradi3g48060.1	Sobic.004G207000.1	Seita.1G223600.1
Sevir.2G391700	8.75	9.2	11.08	11.78	16.57	10.32	0.75	0.61	0.89	1.99	0.43	1.28	RPK2	Protein kinase, ATP binding site;Leucine-rich repeat-containing N-terminal, type 2;Protein kinase-like domain;Serine/threonine-protein kinase, active site;Leucine-rich repeat, typical subtype;Serine/threonine- / dual specificity protein kinase, catalytic domain;Leucine-rich repeat;Protein kinase, catalytic domain;Concanavalin A-like lectin/glucanase, subgroup	AT3G02130.1	RPK2,TOAD2	receptor-like protein kinase 2	LOC_Os07g41140.1	receptor-like protein kinase precursor, putative, expressed	Zm00001d022066_T001; Zm00001d013251_T001	GRMZM2G017409_T01; GRMZM2G072658_T01	Bradi1g22200.3	Sobic.002G366900.2; Sobic.001G085300.1	Seita.2G381400.1
Sevir.4G294000	2.32	6.91	9.38	5.74	8.56	5.52	0.58	0.69	0.98	1.02	1.06	1.22	CLV1/TD1	leucine-rich repeat receptor-like kinase protein THICK TASSEL DWARF1-like	Leucine-rich repeat-containing N-terminal, type 2;Protein kinase-like domain;Serine/threonine-protein kinase, active site;Leucine-rich repeat, typical subtype;Serine/threonine- / dual specificity protein kinase, catalytic domain;Leucine-rich repeat;Serine-threonine/tyrosine-protein kinase catalytic domain;Protein kinase, catalytic domain	AT1G75820.1	ATCLV1,CLV1,FAS3,FLO5	Leucine-rich receptor-like protein kinase family protein	LOC_Os06g50340.1	receptor protein kinase CLAVATA1 precursor, putative, expressed	Zm00001d014793_T001; Zm00001d048968_T001	GRMZM2G300133_T01; GRMZM2G043584_T01	Bradi1g30160.1; Bradi1g69097.1	Sobic.010G267700.1; Sobic.005G091000.1	Seita.4G281800.1; Seita.9G281300.1

## Sheet: most co-regulated
TableS3 sheet2: Expression of leucine rich receptors and WOX genes that are coexpressed with SvFon2 (Sevir.8G183800). Weight is a value quantifying the co-expression level of a gene pair generated by Weighted Gene Co-expression Network Analysis (WGCNA) in Zhu et al. (2018). Expression of genes in Transcripts per Million (TPM) at six different stages of inflorescence development. For annotation, W…
		Mean expression value (TPM) at different stages of inflorescence development						Standard deviation of expression value (TPM) at different stages of inflorescence development							Gene annotation							Homologs in grasses
Gene	weight	10DAS	12DAS	14DAS	15DAS	16DAS	18DAS	10DAS_SD	12DAS_SD	14DAS_SD	15DAS_SD	16DAS_SD	18DAS_SD	homolog of	WikiGene.description	InterPro.description	Best.hit.arabi.name	arabi.symbol	arabi.defline	Best.hit.rice.name	rice.defline	Maizev4.gene	Zmays_284.gene	Bradi.gene	Sobic.gene	Seita.gene
Sevir.6G162300	0.115493	2.88	5.58	9.54	8.21	11.68	9.38	0.71	0.39	1.05	0.45	0.23	1.2	EMS1		Leucine-rich repeat-containing N-terminal, type 2;Protein kinase-like domain;Serine/threonine-protein kinase, active site;Leucine-rich repeat, typical subtype;Serine/threonine- / dual specificity protein kinase, catalytic domain;Leucine-rich repeat;Serine-threonine/tyrosine-protein kinase catalytic domain;Protein kinase, catalytic domain;Concanavalin A-like lectin/glucanase, subgroup	AT5G07280.1	EMS1,EXS	Leucine-rich repeat transmembrane protein kinase	LOC_Os01g68870.2	leucine-rich repeat receptor protein kinase EXS precursor, putative, expressed	Zm00001d042362_T007; Zm00001d042362_T001	GRMZM2G447447_T01; GRMZM2G306771_T01	Bradi2g58780.4; Bradi3g06980.5	Sobic.003G402100.3	Seita.6G156200.1; Seita.5G428100.1
Sevir.2G184200	0.0543929	4.97	12.7	17.19	10.93	19.54	9.63	1.27	0.5	3.51	1.21	1.31	1.19	HSL1	receptor-like protein kinase HSL1-like	Leucine-rich repeat-containing N-terminal, type 2;Protein kinase-like domain;Serine/threonine-protein kinase, active site;Leucine-rich repeat, typical subtype;Serine/threonine- / dual specificity protein kinase, catalytic domain;Leucine-rich repeat;Protein kinase, catalytic domain	AT1G28440.1	HSL1	HAESA-like 1	LOC_Os09g15700.1	receptor-like protein kinase 5 precursor, putative, expressed	Zm00001d020101_T001	GRMZM2G110685_T01	Bradi4g28107.1	Sobic.002G172200.1; Sobic.002G172100.1	Seita.2G177600.1; Seita.8G071500.1
Sevir.4G240900	0.0385022	17.17	23.78	36.8	26.35	37.25	25.23	1.15	1.43	2.36	3.39	6.88	2.97	NA	probable LRR receptor-like serine/threonine-protein kinase At1g14390-like	Protein kinase-like domain;Leucine-rich repeat;Serine-threonine/tyrosine-protein kinase catalytic domain;Protein kinase, catalytic domain	AT1G14390.1		Leucine-rich repeat protein kinase family protein	LOC_Os06g38970.1	expressed protein	Zm00001d046488_T001; Zm00001d046488_T002	GRMZM2G009995_T01; GRMZM2G054949_T01	Bradi1g37210.1	Sobic.010G177100.1	Seita.4G229500.1
Sevir.4G240700	0.0281341	6.12	8.81	11.83	7.76	12.24	7.05	0.79	0.18	1.74	1.8	1.19	0.71	NA	probable LRR receptor-like serine/threonine-protein kinase At1g34110-like	Protein kinase, ATP binding site;Leucine-rich repeat-containing N-terminal, type 2;Protein kinase-like domain;Serine/threonine-protein kinase, active site;Leucine-rich repeat, typical subtype;Serine/threonine- / dual specificity protein kinase, catalytic domain;Leucine-rich repeat;Protein kinase, catalytic domain	AT1G34110.1		Leucine-rich receptor-like protein kinase family protein	LOC_Os06g38990.1	receptor-like protein kinase 2 precursor, putative, expressed	Zm00001d046485_T001; Zm00001d001840_T001	GRMZM2G148702_T01; AC194873.3_FGT006	Bradi1g37190.1; Bradi3g39150.1	Sobic.010G177300.1; Sobic.006G013300.1	Seita.4G229300.1; Seita.6G194500.1
Sevir.4G294000	0.0349816	2.32	6.91	9.38	5.74	8.56	5.52	0.58	0.69	0.98	1.02	1.06	1.22	CLV1/TD1	leucine-rich repeat receptor-like kinase protein THICK TASSEL DWARF1-like	Leucine-rich repeat-containing N-terminal, type 2;Protein kinase-like domain;Serine/threonine-protein kinase, active site;Leucine-rich repeat, typical subtype;Serine/threonine- / dual specificity protein kinase, catalytic domain;Leucine-rich repeat;Serine-threonine/tyrosine-protein kinase catalytic domain;Protein kinase, catalytic domain	AT1G75820.1	ATCLV1,CLV1,FAS3,FLO5	Leucine-rich receptor-like protein kinase family protein	LOC_Os06g50340.1	receptor protein kinase CLAVATA1 precursor, putative, expressed	Zm00001d014793_T001; Zm00001d048968_T001	GRMZM2G300133_T01; GRMZM2G043584_T01	Bradi1g30160.1; Bradi1g69097.1	Sobic.010G267700.1; Sobic.005G091000.1	Seita.4G281800.1; Seita.9G281300.1
Sevir.5G266300	0.0282072	0.87	4.36	6.25	3.92	4.57	3.6	0.12	0.81	0.72	0.73	1.38	0.59	WOX9	WUSCHEL-related homeobox 7-like	Homeodomain-like;Homeobox domain	AT2G33880.1	HB-3,STIP,WOX9	homeobox-3	LOC_Os01g47710.1	homeobox domain containing protein, expressed	Zm00001d043937_T001; Zm00001d039017_T001	GRMZM2G031882_T02; GRMZM2G133972_T01	Bradi2g46055.1; Bradi2g16444.1	Sobic.003G250100.2; Sobic.009G233000.1	Seita.5G263100.1; Seita.3G145800.1

## Sheet: all LRR 
TableS3 sheet3: Expression of genes homologous to known leucine rich receptors (LRR) in Transcripts per Million (TPM) at six different stages of inflorescence development. For annotation, WikiGene.description and InterPro.description are from Biomart of EnsemblPlants. Best.hit.arabi.name, arabi.symbol, arabi.defline, Best.hit.rice.name and rice.defline are from the annotation file for the S. viri…
	Mean expression value (TPM) at different stages of inflorescence development						Standard deviation of expression value (TPM) at different stages of inflorescence development							Gene annotation							Homologs in grasses
Gene	10DAS	12DAS	14DAS	15DAS	16DAS	18DAS	10DAS_SD	12DAS_SD	14DAS_SD	15DAS_SD	16DAS_SD	18DAS_SD	homolog of	WikiGene.description	InterPro.description	Best.hit.arabi.name	arabi.symbol	arabi.defline	Best.hit.rice.name	rice.defline	Maizev4.gene	Zmays_284.gene	Bradi.gene	Sobic.gene	Seita.gene
Sevir.8G118500	653.1	432.14	428.42	185.02	194.6	141.6	347.61	109.92	146.48	70.14	21.42	73.09	NA	probable receptor protein kinase TMK1-like	Protein kinase, ATP binding site;Protein kinase-like domain;Serine/threonine-protein kinase, active site;Leucine-rich repeat, typical subtype;Serine/threonine- / dual specificity protein kinase, catalytic domain;Leucine-rich repeat;Protein kinase, catalytic domain;Concanavalin A-like lectin/glucanase, subgroup	AT1G66150.1	TMK1	transmembrane kinase 1	LOC_Os11g26130.1	receptor protein kinase TMK1 precursor, putative, expressed	Zm00001d007313_T001; Zm00001d049159_T001	GRMZM2G349875_T01; GRMZM2G104384_T01	Bradi4g19600.2; Bradi1g30797.2	Sobic.005G111000.1	Seita.8G112900.1
Sevir.4G085800	134.67	199.16	263.69	271.74	393.46	245.6	9.66	11.53	31.33	20.27	16.5	22.28	ERECTA	LRR receptor-like serine/threonine-protein kinase ERECTA-like	Protein kinase, ATP binding site;Leucine-rich repeat-containing N-terminal, type 2;Protein kinase-like domain;Serine/threonine-protein kinase, active site;Leucine-rich repeat, typical subtype;Serine/threonine- / dual specificity protein kinase, catalytic domain;Leucine-rich repeat;Protein kinase, catalytic domain	AT2G26330.1	ER,QRP1	Leucine-rich receptor-like protein kinase family protein	LOC_Os06g10230.1	receptor-like protein kinase 5 precursor, putative, expressed	Zm00001d037114_T002; Zm00001d037114_T012	GRMZM5G809695_T03; GRMZM2G463904_T03	Bradi1g46450.1	Sobic.010G077000.1; Sobic.004G317200.1	Seita.4G086700.1
Sevir.5G359400	254.47	245.03	263.96	187.99	212.66	262.36	17.99	15.98	12.99	7.41	7.18	11.14	NA	somatic embryogenesis receptor kinase 1-like	Leucine-rich repeat-containing N-terminal, type 2;Leucine-rich repeat;Somatic embryogenesis receptor-like kinase	AT5G21090.1		Leucine-rich repeat (LRR) family protein	LOC_Os01g59440.1	BRASSINOSTEROID INSENSITIVE 1-associated receptor kinase 1 precursor, putative, expressed	Zm00001d043149_T001; Zm00001d043149_T002	GRMZM5G815009_T02; GRMZM2G121820_T01	Bradi2g52890.1	Sobic.003G329800.2; Sobic.003G133800.1	Seita.5G354200.1; Seita.9G356500.1
Sevir.3G424200	115.17	142.43	141.35	157.51	170.31	114.84	9.13	8.27	14.16	19.47	7.9	11.88	NA	LRR receptor-like serine/threonine-protein kinase FEI 1-like	Protein kinase, ATP binding site;Protein kinase-like domain;Serine/threonine-protein kinase, active site;Serine/threonine- / dual specificity protein kinase, catalytic domain;Leucine-rich repeat;Protein kinase, catalytic domain	AT5G62710.1		Leucine-rich repeat protein kinase family protein	LOC_Os12g44090.1	leucine-rich repeat family protein, putative, expressed	Zm00001d041215_T002; Zm00001d031211_T012	GRMZM2G147857_T01; GRMZM2G461278_T02	Bradi4g00550.1	Sobic.008G190000.1	Seita.3G406000.1
Sevir.9G114700	88.16	111.93	130.23	118.47	158.91	120.16	7.95	8.64	12.55	11.11	7.21	8.41	NA	probable receptor protein kinase TMK1-like	Protein kinase, ATP binding site;Leucine-rich repeat-containing N-terminal, type 2;Protein kinase-like domain;Serine/threonine-protein kinase, active site;Leucine-rich repeat, typical subtype;Serine/threonine- / dual specificity protein kinase, catalytic domain;Leucine-rich repeat;Serine-threonine/tyrosine-protein kinase catalytic domain;Protein kinase, catalytic domain;Concanavalin A-like lectin…	AT1G66150.1	TMK1	transmembrane kinase 1	LOC_Os03g50810.1	receptor protein kinase TMK1 precursor, putative, expressed	Zm00001d033777_T001; Zm00001d013415_T001	GRMZM2G137788_T01; GRMZM2G158359_T01	Bradi3g53350.1	Sobic.001G113800.1	Seita.9G115800.1; Seita.3G007600.1
Sevir.9G417100	119.59	129.8	136.57	95.26	142.87	92.94	9.86	13.64	11.08	16.68	18.88	9.5	NA	probably inactive leucine-rich repeat receptor-like protein kinase At3g28040-like	Protein kinase, ATP binding site;Leucine-rich repeat-containing N-terminal, type 2;Protein kinase-like domain;Leucine-rich repeat, typical subtype;Leucine-rich repeat;Serine-threonine/tyrosine-protein kinase catalytic domain;Protein kinase, catalytic domain	AT3G56370.1		Leucine-rich repeat protein kinase family protein	LOC_Os03g21730.1	receptor-like protein kinase precursor, putative, expressed	Zm00001d029059_T001	GRMZM2G119850_T01	Bradi1g63200.1	Sobic.001G381100.1	Seita.9G413000.1
Sevir.5G037000	74.06	103.13	129.48	140.1	142.48	108.59	2.31	4.07	12.57	17.08	9.95	4.88	NA	somatic embryogenesis receptor kinase 2-like	Leucine-rich repeat-containing N-terminal, type 2;Leucine-rich repeat;Somatic embryogenesis receptor-like kinase	AT5G21090.1		Leucine-rich repeat (LRR) family protein	LOC_Os01g17250.1	BRASSINOSTEROID INSENSITIVE 1-associated receptor kinase 1 precursor, putative, expressed	Zm00001d043149_T001; Zm00001d043149_T002	GRMZM5G815009_T02; GRMZM2G121820_T01	Bradi2g10816.1; Bradi2g52890.1	Sobic.003G133800.1; Sobic.003G329800.2	Seita.5G039000.1; Seita.5G354200.1
Sevir.4G019500	103.55	94.81	86.58	95.73	136.9	130.9	11.09	2.31	8.69	8.29	6.41	10.97	ERL1	LRR receptor-like serine/threonine-protein kinase ERL2-like	Protein kinase, ATP binding site;Leucine-rich repeat-containing N-terminal, type 2;Protein kinase-like domain;Serine/threonine-protein kinase, active site;Leucine-rich repeat, typical subtype;Serine/threonine- / dual specificity protein kinase, catalytic domain;Leucine-rich repeat;Protein kinase, catalytic domain;Concanavalin A-like lectin/glucanase, subgroup	AT5G62230.1	ERL1	ERECTA-like 1	LOC_Os06g03970.1	receptor-like protein kinase 5 precursor, putative, expressed	Zm00001d045481_T006; Zm00001d045481_T004	GRMZM2G082855_T03	Bradi1g49950.1	Sobic.010G020600.1	Seita.4G019700.1
Sevir.1G345500	73.1	75.41	78.34	102.97	127.02	118.11	2.52	9.25	5.76	7.64	9.43	10.15	ERECTA	LRR receptor-like serine/threonine-protein kinase ERECTA-like	Protein kinase, ATP binding site;Leucine-rich repeat-containing N-terminal, type 2;Protein kinase-like domain;Serine/threonine-protein kinase, active site;Leucine-rich repeat, typical subtype;Serine/threonine- / dual specificity protein kinase, catalytic domain;Leucine-rich repeat;Protein kinase, catalytic domain	AT2G26330.1	ER,QRP1	Leucine-rich receptor-like protein kinase family protein	LOC_Os06g10230.1	receptor-like protein kinase 5 precursor, putative, expressed	Zm00001d018261_T002; Zm00001d018261_T007	GRMZM2G463904_T03; GRMZM5G809695_T03	Bradi1g46450.1	Sobic.004G317200.1	Seita.1G338900.1
Sevir.9G117300	92.97	106.04	106.76	63.12	102.94	91.67	2.4	5.92	3.82	15.13	13.44	4.87	NA	probable inactive receptor kinase RLK902-like	Protein kinase, ATP binding site;Leucine-rich repeat-containing N-terminal, type 2;Protein kinase-like domain;Protein kinase, catalytic domain	AT1G48480.1	RKL1	receptor-like kinase 1	LOC_Os03g50450.1	inactive receptor kinase At2g26730 precursor, putative, expressed	Zm00001d033745_T001; Zm00001d013430_T001	GRMZM2G023110_T01; GRMZM2G150448_T01	Bradi1g11430.1	Sobic.001G116600.1	Seita.9G118600.1
Sevir.2G369000	78.56	47.95	43.3	106.18	116.04	161.72	13.96	8.16	5.23	43.16	22.35	44.12	NA	polygalacturonase inhibitor 1-like	Leucine-rich repeat-containing N-terminal, type 2;Leucine-rich repeat, typical subtype;Leucine-rich repeat	AT5G06860.1	ATPGIP1,PGIP1	polygalacturonase inhibiting protein 1	LOC_Os07g38130.1	polygalacturonase inhibitor 1 precursor, putative, expressed	Zm00001d006623_T001; Zm00001d021836_T001	GRMZM2G099295_T01; GRMZM2G333980_T01	Bradi1g24230.1	Sobic.002G343600.1	Seita.2G357900.1
Sevir.4G023500	65.46	80.57	92.67	96.19	116.91	69.27	2.8	2.93	8.44	6.61	5.93	8.12	NA	probable LRR receptor-like serine/threonine-protein kinase At1g34110-like	Leucine-rich repeat-containing N-terminal, type 2;Protein kinase-like domain;Leucine-rich repeat, typical subtype;Leucine-rich repeat;Serine-threonine/tyrosine-protein kinase catalytic domain;Protein kinase, catalytic domain;Concanavalin A-like lectin/glucanase, subgroup	AT2G45340.1		Leucine-rich repeat protein kinase family protein	LOC_Os06g04370.1	expressed protein	Zm00001d045445_T001; Zm00001d045445_T002	GRMZM2G097313_T01; GRMZM5G899854_T01	Bradi1g51630.1	Sobic.010G024500.1	Seita.4G023900.1
Sevir.6G043000	55.68	68.31	92.01	87.76	107.92	70.5	5.18	2.83	1.31	11.33	8.96	7.95	NA	somatic embryogenesis receptor kinase 2-like	Protein kinase, ATP binding site;Leucine-rich repeat-containing N-terminal, type 2;Protein kinase-like domain;Serine/threonine-protein kinase, active site;Serine/threonine- / dual specificity protein kinase, catalytic domain;Leucine-rich repeat;Protein kinase, catalytic domain;Concanavalin A-like lectin/glucanase, subgroup;Somatic embryogenesis receptor-like kinase	AT1G34210.1	ATSERK2,SERK2	somatic embryogenesis receptor-like kinase 2	LOC_Os08g07760.1	BRASSINOSTEROID INSENSITIVE 1-associated receptor kinase 1 precursor, putative, expressed	Zm00001d024430_T003; Zm00001d024430_T002	GRMZM2G384439_T02; GRMZM2G354827_T02	Bradi3g15660.2; Bradi3g46747.1	Sobic.007G059600.1; Sobic.004G189900.1	Seita.6G045800.1; Seita.2G176500.1
Sevir.9G462000	68.31	69.59	74.55	83.85	94.09	80.3	2.87	1.55	4.05	11.23	5.33	6.41	NA	LRR receptor-like serine/threonine-protein kinase FEI 1-like	Protein kinase, ATP binding site;Leucine-rich repeat-containing N-terminal, type 2;Protein kinase-like domain;Serine/threonine-protein kinase, active site;Serine/threonine- / dual specificity protein kinase, catalytic domain;Leucine-rich repeat;Protein kinase, catalytic domain;Concanavalin A-like lectin/glucanase, subgroup;LRR receptor-like serine/threonine-protein kinase FEI1/2	AT1G31420.2	FEI1	Leucine-rich repeat protein kinase family protein	LOC_Os03g16010.1	BRASSINOSTEROID INSENSITIVE 1-associated receptor kinase 1 precursor, putative, expressed	Zm00001d028560_T024; Zm00001d028560_T019	GRMZM5G886952_T01; GRMZM2G479243_T01	Bradi1g67050.2	Sobic.001G425700.1	Seita.9G458500.1
Sevir.2G365700	53.77	54.57	62.52	88.86	102.04	78.27	4.11	2.82	5.21	5.58	11.13	5.73	NA	protein STRUBBELIG-RECEPTOR FAMILY 3-like	Leucine-rich repeat-containing N-terminal, type 2;Protein kinase-like domain;Leucine-rich repeat;Serine-threonine/tyrosine-protein kinase catalytic domain;Protein kinase, catalytic domain	AT2G20850.1; AT4G03390.1; AT4G03390.1	SRF1; SRF3; SRF3	STRUBBELIG-receptor family 1; STRUBBELIG-receptor family 3; STRUBBELIG-receptor family 3	LOC_Os07g37810.1; LOC_Os07g37810.2; LOC_Os07g37810.1	STRUBBELIG-RECEPTOR FAMILY 1 precursor, putative, expressed; STRUBBELIG-RECEPTOR FAMILY 1 precursor, putative, expressed; STRUBBELIG-RECEPTOR FAMILY 1 precursor, putative, expressed	Zm00001d021810_T013; Zm00001d021810_T015	GRMZM2G434277_T01	Bradi1g24567.2	Sobic.002G341200.1	Seita.2G354800.1
Sevir.1G209900	52.28	55.42	71.63	78.66	94.72	75.1	3.38	3.29	3.61	5.67	3.49	1.8	NA	somatic embryogenesis receptor kinase 1-like	Protein kinase, ATP binding site;Leucine-rich repeat-containing N-terminal, type 2;Protein kinase-like domain;Serine/threonine-protein kinase, active site;Serine/threonine- / dual specificity protein kinase, catalytic domain;Protein kinase, catalytic domain;Concanavalin A-like lectin/glucanase, subgroup	AT1G71830.1	ATSERK1,SERK1	somatic embryogenesis receptor-like kinase 1	LOC_Os04g38480.1	BRASSINOSTEROID INSENSITIVE 1-associated receptor kinase 1 precursor, putative, expressed	Zm00001d016928_T010; Zm00001d016928_T005	GRMZM2G115420_T01; GRMZM2G150024_T01	Bradi3g46747.1; Bradi5g12227.1	Sobic.004G189900.1; Sobic.007G059600.1	Seita.1G206600.1; Seita.6G045800.1
Sevir.5G300600	54.41	61.3	66.77	63.32	91.71	62.54	4.12	5.03	4.16	9.52	3.98	3.3	NA	systemin receptor SR160-like	Protein kinase, ATP binding site;Protein kinase-like domain;Serine/threonine-protein kinase, active site;Leucine-rich repeat, typical subtype;Serine/threonine- / dual specificity protein kinase, catalytic domain;Leucine-rich repeat;Protein kinase, catalytic domain;Concanavalin A-like lectin/glucanase, subgroup	AT4G39400.1	ATBRI1,BIN1,BRI1,CBB2,DWF2	Leucine-rich receptor-like protein kinase family protein	LOC_Os01g52050.1	systemin receptor SR160 precursor, putative, expressed	Zm00001d043634_T001; Zm00001d011721_T001	GRMZM2G048294_T01; GRMZM5G801509_T01	Bradi2g48279.1	Sobic.003G277900.1	Seita.5G297900.1
Sevir.2G034800	50.4	68.61	70.97	48.9	87.79	47.66	7.47	6.79	11.22	8.52	6.68	4.92	NA	probable LRR receptor-like serine/threonine-protein kinase At4g20940-like	Leucine-rich repeat-containing N-terminal, type 2;Protein kinase-like domain;Leucine-rich repeat, typical subtype;Leucine-rich repeat;Serine-threonine/tyrosine-protein kinase catalytic domain;Protein kinase, catalytic domain	AT4G20940.1		Leucine-rich receptor-like protein kinase family protein	LOC_Os07g05190.1	leucine-rich repeat family protein, putative, expressed	Zm00001d007862_T001; Zm00001d007862_T002	GRMZM2G034572_T01	Bradi1g58260.1	Sobic.002G032500.1	Seita.2G030300.1
Sevir.5G307500	37.8	66.59	100.77	45.66	82.73	30.65	6.53	13.12	24.02	16.94	10.54	7.94	NA	probable leucine-rich repeat receptor-like protein kinase At1g35710-like	Leucine-rich repeat, typical subtype;Leucine-rich repeat	AT2G42800.1	AtRLP29,RLP29	receptor like protein 29	LOC_Os01g52880.1	leucine-rich repeat family protein, putative, expressed	Zm00001d011757_T001; Zm00001d038742_T001	GRMZM2G166413_T01; AC205471.4_FGT008	Bradi2g48820.1	Sobic.003G283900.1; Sobic.009G208300.1	Seita.5G304800.1
Sevir.5G117600	56.53	61.15	62.02	61.31	62.86	60.22	6.49	6.87	6.09	9.73	6.77	6.41	CIK1	protein NSP-INTERACTING KINASE 3-like	Protein kinase, ATP binding site;Leucine-rich repeat-containing N-terminal, type 2;Protein kinase-like domain;Serine/threonine-protein kinase, active site;Serine/threonine- / dual specificity protein kinase, catalytic domain;Leucine-rich repeat;Serine-threonine/tyrosine-protein kinase catalytic domain;Protein kinase, catalytic domain;Concanavalin A-like lectin/glucanase, subgroup	AT1G60800.1	NIK3	NSP-interacting kinase 3	LOC_Os01g07630.1	BRASSINOSTEROID INSENSITIVE 1-associated receptor kinase 1 precursor, putative, expressed	Zm00001d039678_T003; Zm00001d008724_T005	GRMZM2G010693_T01; GRMZM2G067675_T01	Bradi2g04420.1; Bradi1g51630.1	Sobic.003G051100.1	Seita.5G121100.1
Sevir.8G077900	42.84	46.87	54.17	64.07	78.51	77.53	1.92	3.86	3.61	3.61	1.33	5.21	NA	probably inactive leucine-rich repeat receptor-like protein kinase At5g48380-like	Protein kinase-like domain;Leucine-rich repeat;Serine-threonine/tyrosine-protein kinase catalytic domain;Protein kinase, catalytic domain;Concanavalin A-like lectin/glucanase, subgroup	AT5G48380.1	BIR1	BAK1-interacting receptor-like kinase 1	LOC_Os11g14420.1	inactive receptor kinase At1g27190 precursor, putative, expressed	Zm00001d007277_T001; Zm00001d039672_T001	GRMZM2G172330_T01; GRMZM2G066506_T01	Bradi4g20890.1	Sobic.005G084100.1	Seita.8G076700.1
Sevir.9G484200	30.24	47.02	64.11	54.51	98.63	53.48	7.15	6.54	14.08	9.98	10.51	6.33	BAM2	leucine-rich repeat receptor-like serine/threonine-protein kinase BAM2-like	Protein kinase, ATP binding site;Leucine-rich repeat-containing N-terminal, type 2;Protein kinase-like domain;Serine/threonine-protein kinase, active site;Leucine-rich repeat, typical subtype;Serine/threonine- / dual specificity protein kinase, catalytic domain;Leucine-rich repeat;Protein kinase, catalytic domain	AT3G49670.1	BAM2	Leucine-rich receptor-like protein kinase family protein	LOC_Os03g12730.1	receptor protein kinase CLAVATA1 precursor, putative, expressed	Zm00001d028317_T001; Zm00001d018752_T001	GRMZM2G043584_T01; GRMZM2G141517_T01	Bradi1g69097.1; Bradi1g30160.1	Sobic.001G446400.1; Sobic.005G091000.1	Seita.9G480700.1; Seita.2G026900.1
Sevir.6G211600	53.93	58.03	56.87	45.04	55.92	56.94	6.95	4.67	3.83	10	4.54	9.9	NA	probable inactive leucine-rich repeat receptor-like protein kinase At1g66830-like	Leucine-rich repeat-containing N-terminal, type 2;Protein kinase-like domain;Protein kinase, catalytic domain	AT2G42290.1		Leucine-rich repeat protein kinase family protein	LOC_Os08g39590.1	inactive receptor kinase At2g26730 precursor, putative, expressed	Zm00001d031437_T001	GRMZM5G836190_T02	Bradi3g39910.1	Sobic.007G211200.1	Seita.6G204500.1; Seita.3G090400.1
Sevir.7G219500	36.9	46.24	46.46	45.81	85.77	60.46	8.23	8.3	9.03	9.44	7.58	5.54	NA	probable LRR receptor-like serine/threonine-protein kinase At4g36180-like	Leucine-rich repeat-containing N-terminal, type 2;Protein kinase-like domain;Serine/threonine-protein kinase, active site;Leucine-rich repeat, typical subtype;Serine/threonine- / dual specificity protein kinase, catalytic domain;Leucine-rich repeat;Protein kinase, catalytic domain;Concanavalin A-like lectin/glucanase, subgroup	AT4G36180.1		Leucine-rich receptor-like protein kinase family protein	LOC_Os04g48760.1	leucine-rich repeat family protein, putative, expressed	Zm00001d026063_T001; Zm00001d002599_T002	GRMZM2G114276_T01; GRMZM2G016477_T01	Bradi5g19017.1	Sobic.006G187000.1	Seita.7G207700.1
Sevir.7G329800	43.3	43.9	49.84	49.8	61.96	63.71	6.59	1.84	1.39	7.01	3.53	8.71	NA	probable leucine-rich repeat receptor-like protein kinase At1g68400-like	Leucine-rich repeat-containing N-terminal, type 2;Protein kinase-like domain;Leucine-rich repeat;Protein kinase, catalytic domain	AT2G36570.1		Leucine-rich repeat protein kinase family protein	LOC_Os12g05120.1	receptor kinase, putative, expressed	Zm00001d004929_T001; Zm00001d044284_T001	GRMZM2G046201_T01; GRMZM2G384706_T01	Bradi4g42800.1; Bradi5g03410.1	Sobic.005G034500.1; Sobic.003G083500.1	Seita.7G319700.1; Seita.8G031300.1
Sevir.4G195300	56.3	50.38	55.56	55.56	58.46	31.17	10.59	2.56	4.02	13.6	5.68	3.79	NA	protein NSP-INTERACTING KINASE 1-like	Protein kinase, ATP binding site;Leucine-rich repeat-containing N-terminal, type 2;Protein kinase-like domain;Serine/threonine-protein kinase, active site;Serine/threonine- / dual specificity protein kinase, catalytic domain;Leucine-rich repeat;Protein kinase, catalytic domain;Concanavalin A-like lectin/glucanase, subgroup	AT5G16000.1	NIK1	NSP-interacting kinase 1	LOC_Os06g16330.1	BRASSINOSTEROID INSENSITIVE 1-associated receptor kinase 1 precursor, putative, expressed	Zm00001d045728_T004; Zm00001d045728_T007	GRMZM2G145720_T04; GRMZM2G349665_T04	Bradi1g43690.1; Bradi3g56250.1	Sobic.010G115300.1	Seita.4G122300.1
Sevir.9G072100	39.11	44.85	48.5	42.41	71.02	53.79	1.68	2.47	3.65	7.12	1.53	2.97	BAM1	leucine-rich repeat receptor-like serine/threonine-protein kinase BAM1-like	Leucine-rich repeat-containing N-terminal, type 2;Protein kinase-like domain;Serine/threonine-protein kinase, active site;Leucine-rich repeat, typical subtype;Serine/threonine- / dual specificity protein kinase, catalytic domain;Leucine-rich repeat;Protein kinase, catalytic domain	AT5G65700.2	BAM1	Leucine-rich receptor-like protein kinase family protein	LOC_Os03g56270.2	receptor protein kinase CLAVATA1 precursor, putative, expressed	Zm00001d013162_T001; Zm00001d034240_T002	GRMZM2G072569_T01; GRMZM2G141517_T01	Bradi1g07180.1; Bradi1g57900.2	Sobic.001G074000.1; Sobic.002G027600.3	Seita.9G073200.1; Seita.2G026900.1
Sevir.3G273800	50.74	58.84	48.21	43.88	42.83	51	4.47	6.71	9.41	28.68	12.79	3.08	NA	probable leucine-rich repeat receptor-like protein kinase At5g49770-like	Protein kinase, ATP binding site;Protein kinase-like domain;Serine-threonine/tyrosine-protein kinase catalytic domain;Protein kinase, catalytic domain;Concanavalin A-like lectin/glucanase, subgroup	AT3G26700.1; AT3G26700.1	;	Protein kinase superfamily protein; Protein kinase superfamily protein	LOC_Os05g30820.1; LOC_Os05g30820.2	protein kinase, putative, expressed; protein kinase, putative, expressed	Zm00001d037898_T006; Zm00001d037898_T001	GRMZM5G835629_T02	NA	Sobic.009G117100.2	Seita.3G267100.1
Sevir.5G434000	15.65	38.09	67	49.38	85.87	37.91	3.9	5.15	10.02	5.26	2.61	5.06	NA	leucine-rich repeat receptor protein kinase EXS-like	Protein kinase, ATP binding site;Leucine-rich repeat-containing N-terminal, type 2;Protein kinase-like domain;Serine/threonine-protein kinase, active site;Leucine-rich repeat, typical subtype;Serine/threonine- / dual specificity protein kinase, catalytic domain;Leucine-rich repeat;Protein kinase, catalytic domain;Concanavalin A-like lectin/glucanase, subgroup	AT5G07280.1; AT5G07280.1	EMS1,EXS; EMS1,EXS	Leucine-rich repeat transmembrane protein kinase; Leucine-rich repeat transmembrane protein kinase	LOC_Os01g68870.1; LOC_Os01g68870.2	leucine-rich repeat receptor protein kinase EXS precursor, putative, expressed; leucine-rich repeat receptor protein kinase EXS precursor, putative, expressed	Zm00001d042362_T001; Zm00001d042362_T007	GRMZM2G447447_T01; GRMZM2G107484_T01	Bradi2g58780.4; Bradi3g06980.5	Sobic.003G402100.3; Sobic.004G078400.1	Seita.5G428100.1; Seita.6G156200.1
Sevir.7G153400	39.85	44.35	54.95	42.25	52.93	38.23	1.62	3.64	3.29	8.88	4.06	2.22	NA	probable inactive receptor kinase At1g27190-like	Protein kinase-like domain;Leucine-rich repeat;Serine-threonine/tyrosine-protein kinase catalytic domain;Protein kinase, catalytic domain	AT3G28450.1		Leucine-rich repeat protein kinase family protein	LOC_Os04g41030.1	inactive receptor kinase At1g27190 precursor, putative, expressed	Zm00001d003245_T001; Zm00001d006033_T026	GRMZM2G021619_T01; GRMZM2G167280_T01	Bradi5g13960.1	Sobic.006G127400.1	Seita.7G144800.1
Sevir.2G446800	29.41	35.48	42.79	41.32	59.96	62.47	3.07	1.33	4.15	2.52	2.77	4.93	NA	probable inactive receptor kinase At5g58300-like	Protein kinase, ATP binding site;Leucine-rich repeat-containing N-terminal, type 2;Protein kinase-like domain;Leucine-rich repeat, typical subtype;Leucine-rich repeat;Protein kinase, catalytic domain;Concanavalin A-like lectin/glucanase, subgroup	AT5G58300.1		Leucine-rich repeat protein kinase family protein	LOC_Os07g48310.2	inactive receptor kinase At2g26730 precursor, putative, expressed	Zm00001d022432_T004; Zm00001d022432_T001	GRMZM2G080270_T01; GRMZM2G127687_T01	Bradi1g63350.1; Bradi1g69550.1	Sobic.002G419200.1; Sobic.001G451800.1	Seita.2G434300.1; Seita.5G016200.1
Sevir.9G253300	34.7	44.69	46.13	47.91	57.56	34.58	2.25	2.5	2.03	4.38	3.14	3	NA	protein STRUBBELIG-RECEPTOR FAMILY 6-like	Protein kinase, ATP binding site;Leucine-rich repeat-containing N-terminal, type 2;Protein kinase-like domain;Leucine-rich repeat, typical subtype;Leucine-rich repeat;Serine-threonine/tyrosine-protein kinase catalytic domain;Protein kinase, catalytic domain;Concanavalin A-like lectin/glucanase, subgroup	AT1G53730.1	SRF6	STRUBBELIG-receptor family 6	LOC_Os10g25090.1	STRUBBELIG-RECEPTOR FAMILY 6 precursor, putative, expressed	Zm00001d030551_T001; Zm00001d030551_T002	GRMZM2G004572_T01; GRMZM2G153393_T01	NA	Sobic.001G261400.2	Seita.9G250400.1; Seita.9G516200.1
Sevir.5G089700	43.43	43.57	40.68	38.23	39.96	51.17	6.27	1.32	5.29	4.43	1.41	5.92	NA	probable leucine-rich repeat receptor-like protein kinase At1g68400-like	Protein kinase, ATP binding site;Leucine-rich repeat-containing N-terminal, type 2;Protein kinase-like domain;Leucine-rich repeat;Protein kinase, catalytic domain	AT1G68400.1		leucine-rich repeat transmembrane protein kinase family protein	LOC_Os01g04230.1	inactive receptor kinase At2g26730 precursor, putative, expressed	Zm00001d039967_T001; Zm00001d004929_T001	GRMZM2G309897_T01; GRMZM2G309868_T01	Bradi2g02290.1; Bradi3g17567.1	Sobic.003G083500.1	Seita.5G091400.1; Seita.8G031300.1
Sevir.1G311000	19.49	25.01	37.07	61.72	66.08	44.72	3.78	1.13	3.1	10.62	2.74	2.85	NA	protein NSP-INTERACTING KINASE 1-like	Leucine rich repeat 4;Protein kinase, ATP binding site;Leucine-rich repeat-containing N-terminal, type 2;Protein kinase-like domain;Serine/threonine-protein kinase, active site;Serine/threonine- / dual specificity protein kinase, catalytic domain;Leucine-rich repeat;Protein kinase, catalytic domain;Concanavalin A-like lectin/glucanase, subgroup	AT5G16000.1	NIK1	NSP-interacting kinase 1	LOC_Os06g16330.1	BRASSINOSTEROID INSENSITIVE 1-associated receptor kinase 1 precursor, putative, expressed	Zm00001d017913_T004; Zm00001d017913_T007	GRMZM2G019317_T01	Bradi3g56250.1; Bradi1g43690.1	Sobic.004G252200.1	Seita.1G305000.1
Sevir.1G054500	32.29	37.61	39.81	49.3	47.8	35.16	2.03	3.73	3.33	4.58	2.14	3.72	NA	protein STRUBBELIG-RECEPTOR FAMILY 8-like	Protein kinase-like domain;Leucine-rich repeat;Serine-threonine/tyrosine-protein kinase catalytic domain;Protein kinase, catalytic domain	AT4G22130.1	SRF8	STRUBBELIG-receptor family 8	LOC_Os02g09740.1	STRUBBELIG-RECEPTOR FAMILY 7 precursor, putative, expressed	Zm00001d015649_T003; Zm00001d015649_T004	GRMZM2G103070_T01; GRMZM2G071573_T02	Bradi3g06590.1; Bradi1g35477.1	Sobic.004G073800.1; Sobic.010G199700.1	Seita.1G055300.1; Seita.4G207500.1
Sevir.9G498100	33.59	37.38	42.65	40.68	45.81	35.93	3.34	0.97	4.9	4.42	2.75	1.69	NA	probable leucine-rich repeat receptor-like protein kinase At1g35710-like	Leucine rich repeat 4;Leucine-rich repeat-containing N-terminal, type 2;Leucine-rich repeat, typical subtype;Leucine-rich repeat	AT5G61240.1		Leucine-rich repeat (LRR) family protein	LOC_Os03g11340.1	leucine-rich repeat resistance protein, putative, expressed	Zm00001d028189_T001; Zm00001d028189_T002	GRMZM2G107872_T02; AC206831.3_FGT015	Bradi1g70280.1	Sobic.001G459900.1	Seita.9G494100.1
Sevir.4G301900	50.29	48.53	46.65	24.04	35.64	29.3	5.46	1.49	4.01	7.09	4.58	2.22	NA	probable LRR receptor-like serine/threonine-protein kinase At4g36180-like	Leucine-rich repeat	AT3G49750.1	AtRLP44,RLP44	receptor like protein 44	LOC_Os09g04490.1	inactive receptor kinase At1g27190 precursor, putative, expressed	Zm00001d052058_T001; Zm00001d018344_T001	GRMZM2G146346_T01; GRMZM2G027439_T01	Bradi4g08540.1	Sobic.004G326100.1; Sobic.007G220400.1	Seita.4G289600.1
Sevir.8G016600	35.59	40.22	44.43	34.18	45.54	31.67	3.77	1.48	3.75	5.62	3.67	2.12	NA	probable leucine-rich repeat receptor-like protein kinase IMK3-like	Leucine-rich repeat-containing N-terminal, type 2;Protein kinase-like domain;Leucine-rich repeat;Serine-threonine/tyrosine-protein kinase catalytic domain;Protein kinase, catalytic domain;Concanavalin A-like lectin/glucanase, subgroup	AT3G56100.1	IMK3,MRLK	meristematic receptor-like kinase	LOC_Os11g01620.1	inactive receptor kinase At2g26730 precursor, putative, expressed	Zm00001d052323_T001; Zm00001d052323_T003	GRMZM2G089819_T01; GRMZM2G388512_T01	Bradi4g44797.1	Sobic.008G006800.1; Sobic.005G005700.1	Seita.8G018200.1; Seita.7G330300.1
Sevir.2G031700	23.83	26.37	31.03	34.58	61.31	45.14	2	0.63	2.43	6.44	2.96	1.98	BAM1	leucine-rich repeat receptor-like serine/threonine-protein kinase BAM1-like	Leucine-rich repeat-containing N-terminal, type 2;Protein kinase-like domain;Serine/threonine-protein kinase, active site;Leucine-rich repeat, typical subtype;Serine/threonine- / dual specificity protein kinase, catalytic domain;Leucine-rich repeat;Protein kinase, catalytic domain;Concanavalin A-like lectin/glucanase, subgroup	AT5G65700.2	BAM1	Leucine-rich receptor-like protein kinase family protein	LOC_Os07g04190.1	receptor protein kinase CLAVATA1 precursor, putative, expressed	Zm00001d018752_T001; Zm00001d034240_T002	GRMZM2G141517_T01; GRMZM2G072569_T01	Bradi1g57900.2; Bradi1g07180.1	Sobic.002G027600.3; Sobic.005G091000.1	Seita.2G026900.1; Seita.9G073200.1
Sevir.5G014900	25.04	30.78	36.77	33.22	51.81	36.46	1.15	2.34	3.24	4.92	2.93	1.47	NA	probable inactive receptor kinase At4g23740-like	Protein kinase, ATP binding site;Leucine-rich repeat-containing N-terminal, type 2;Protein kinase-like domain;Leucine-rich repeat, typical subtype;Leucine-rich repeat;Serine-threonine/tyrosine-protein kinase catalytic domain;Protein kinase, catalytic domain	AT4G23740.1		Leucine-rich repeat protein kinase family protein	LOC_Os01g12390.1	inactive receptor kinase At2g26730 precursor, putative, expressed	Zm00001d039325_T001; Zm00001d008965_T001	GRMZM2G012861_T03; GRMZM2G127687_T01	Bradi2g07330.1; Bradi1g69550.1	Sobic.003G013000.1; Sobic.009G175100.1	Seita.5G016200.1; Seita.2G434300.1
Sevir.9G418900	32.57	34.13	35.63	29.39	43.83	29.82	2.02	3.84	3.79	1.32	2.84	2.33	NA		Protein kinase, ATP binding site;Leucine-rich repeat-containing N-terminal, type 2;Protein kinase-like domain;Protein kinase, catalytic domain;Concanavalin A-like lectin/glucanase, subgroup	AT5G58300.2; AT5G58300.1; AT5G58300.1; AT5G58300.2	; ; ;	Leucine-rich repeat protein kinase family protein; Leucine-rich repeat protein kinase family protein; Leucine-rich repeat protein kinase family protein; Leucine-rich repeat protein kinase family protein	LOC_Os03g21510.1; LOC_Os03g21510.1; LOC_Os03g21510.2; LOC_Os03g21510.2	inactive receptor kinase At2g26730 precursor, putative, expressed; inactive receptor kinase At2g26730 precursor, putative, expressed; inactive receptor kinase At2g26730 precursor, putative, expressed; inactive receptor kinase At2g26730 precursor, putative, expressed	Zm00001d029040_T003; Zm00001d029040_T002	GRMZM2G016480_T01	Bradi1g63350.1	Sobic.001G382700.3	Seita.9G414700.1; Seita.5G360800.1
Sevir.5G366100	30.48	29.26	30.03	33.77	40.11	41.62	2.24	1.71	2.65	2.48	1.41	7.69	NA	probable inactive receptor kinase At5g58300-like	Protein kinase, ATP binding site;Leucine-rich repeat-containing N-terminal, type 2;Protein kinase-like domain;Leucine-rich repeat, typical subtype;Leucine-rich repeat;Serine-threonine/tyrosine-protein kinase catalytic domain;Protein kinase, catalytic domain;Concanavalin A-like lectin/glucanase, subgroup	AT5G58300.2		Leucine-rich repeat protein kinase family protein	LOC_Os01g60330.1	inactive receptor kinase At2g26730 precursor, putative, expressed	Zm00001d043071_T005; Zm00001d043071_T004	GRMZM2G465771_T01; AC218972.3_FGT004	Bradi2g53420.5; Bradi2g22180.1	Sobic.003G336900.1	Seita.5G360800.1; Seita.3G202900.1
Sevir.4G214100	18.51	20.08	24.78	32.82	45.56	61.08	2.34	1.25	2.78	5.47	4.78	9.15	NA	probable LRR receptor-like serine/threonine-protein kinase At4g37250-like	Leucine-rich repeat-containing N-terminal, type 2;Protein kinase-like domain;Leucine-rich repeat;Serine-threonine/tyrosine-protein kinase catalytic domain;Protein kinase, catalytic domain	AT5G67280.1	RLK	receptor-like kinase	LOC_Os06g43170.1	transposon protein, putative, unclassified, expressed	Zm00001d046626_T001; Zm00001d036766_T001	GRMZM2G141288_T01; GRMZM5G837526_T01	Bradi1g30277.1	Sobic.010G202100.1; Sobic.002G142200.1	Seita.4G205200.1; Seita.2G141900.1
Sevir.7G339400	32.91	34.42	37.11	28.06	36.17	29.32	2.86	1.44	3.44	4.47	4.21	1.48	NA	probable leucine-rich repeat receptor-like protein kinase IMK3-like	Leucine-rich repeat-containing N-terminal, type 2;Protein kinase-like domain;Leucine-rich repeat;Serine-threonine/tyrosine-protein kinase catalytic domain;Protein kinase, catalytic domain	AT3G56100.1	IMK3,MRLK	meristematic receptor-like kinase	LOC_Os11g01620.1	inactive receptor kinase At2g26730 precursor, putative, expressed	Zm00001d052323_T001; Zm00001d052323_T003	GRMZM2G089819_T01; GRMZM2G388512_T01	Bradi4g44797.1	Sobic.008G006800.1; Sobic.005G005700.1	Seita.7G330300.1; Seita.8G018200.1
Sevir.9G095000	29.59	30.68	34.25	28.26	40.02	30.92	2.92	2.75	3.1	3.03	2.52	4.24	NA	uncharacterized LOC101782116	Protein kinase-like domain;Serine/threonine-protein kinase, active site;Leucine-rich repeat, typical subtype;Serine/threonine- / dual specificity protein kinase, catalytic domain;Leucine-rich repeat;Protein kinase, catalytic domain	AT1G04210.1		Leucine-rich repeat protein kinase family protein	LOC_Os03g53250.1	expressed protein	Zm00001d033982_T001; Zm00001d033982_T035	GRMZM2G155312_T01; GRMZM2G315812_T01	Bradi1g08977.2	Sobic.001G094000.1	Seita.9G096600.1
Sevir.7G275200	29.52	35.39	32.39	24.01	37.84	33.41	1.77	3.26	2.77	4.81	2.87	1.43	NA	probable inactive receptor kinase At5g67200-like	Protein kinase-like domain;Leucine-rich repeat;Protein kinase, catalytic domain	AT5G67200.1		Leucine-rich repeat protein kinase family protein	LOC_Os04g55620.1	receptor kinase, putative, expressed	Zm00001d002068_T001; Zm00001d045175_T001	GRMZM2G055844_T01; GRMZM2G328213_T01	Bradi5g24060.1	Sobic.006G241800.1	Seita.7G263900.1
Sevir.5G444600	27.54	30.09	30.86	30.59	42.57	23.91	2.93	2.01	1.28	2.05	1.9	3.98	CRN	inactive leucine-rich repeat receptor-like protein kinase CORYNE-like	Protein kinase-like domain;Protein kinase, catalytic domain	AT5G13290.2	CRN,SOL2	Protein kinase superfamily protein	LOC_Os01g70260.1	receptor-like protein kinase 2 precursor, putative, expressed	Zm00001d042268_T001	GRMZM2G032132_T01	Bradi2g59470.1	Sobic.003G411800.1	Seita.5G438000.1
Sevir.6G170900	28.18	18.34	21.87	34.71	41.18	40.35	4.29	1.79	1.55	2.84	1.4	4.43	CIK2	probable LRR receptor-like serine/threonine-protein kinase At2g23950-like	Protein kinase, ATP binding site;Leucine-rich repeat-containing N-terminal, type 2;Protein kinase-like domain;Serine/threonine-protein kinase, active site;Serine/threonine- / dual specificity protein kinase, catalytic domain;Leucine-rich repeat;Serine-threonine/tyrosine-protein kinase catalytic domain;Protein kinase, catalytic domain;Concanavalin A-like lectin/glucanase, subgroup	AT2G23950.1		Leucine-rich repeat protein kinase family protein	LOC_Os08g34380.1	receptor-like kinase, putative, expressed	Zm00001d032142_T003; Zm00001d032142_T001	GRMZM2G151955_T01; GRMZM2G349665_T04	Bradi3g36797.6	Sobic.007G142900.1	Seita.6G164900.1
Sevir.2G082100	26.44	29.86	32.09	28.47	42.52	23.94	4.82	1.42	3.15	4.27	1.01	2.08	NA	leucine-rich repeat receptor-like tyrosine-protein kinase At2g41820-like	Protein kinase, ATP binding site;Protein kinase-like domain;Twin-arginine translocation pathway, signal sequence;Leucine-rich repeat, typical subtype;Leucine-rich repeat;Serine-threonine/tyrosine-protein kinase catalytic domain;Protein kinase, catalytic domain;Concanavalin A-like lectin/glucanase, subgroup	AT2G41820.1		Leucine-rich repeat protein kinase family protein	LOC_Os07g10630.1	expressed protein	Zm00001d005252_T001; Zm00001d019145_T001	GRMZM2G073928_T01; GRMZM2G432642_T02	Bradi1g54280.1	Sobic.002G074000.1	Seita.2G079600.1
Sevir.5G002800	29.64	32.07	31.51	19.02	33.61	22.92	3.75	1.55	1.76	4.15	3.33	1.85	NA	receptor-like protein kinase HSL1-like	Protein kinase, ATP binding site;Leucine-rich repeat-containing N-terminal, type 2;Protein kinase-like domain;Serine/threonine-protein kinase, active site;Serine/threonine- / dual specificity protein kinase, catalytic domain;Leucine-rich repeat;Protein kinase, catalytic domain	AT1G28440.1	HSL1	HAESA-like 1	LOC_Os01g13800.1	receptor-like protein kinase 5 precursor, putative, expressed	Zm00001d009029_T001; Zm00001d048968_T001	GRMZM2G070520_T02; GRMZM2G068398_T01	Bradi2g08350.1; Bradi3g35137.1	Sobic.003G002100.1; Sobic.003G083500.1	Seita.5G002800.1
Sevir.1G127000	18.04	20.1	24.71	37.09	37.54	31.26	2.57	0.51	1.92	5.39	2.13	1.33	NA	probable LRR receptor-like serine/threonine-protein kinase At5g10290-like	Protein kinase, ATP binding site;Leucine-rich repeat-containing N-terminal, type 2;Protein kinase-like domain;Serine/threonine-protein kinase, active site;Serine/threonine- / dual specificity protein kinase, catalytic domain;Leucine-rich repeat;Phospholipase C, phosphatidylinositol-specific , X domain;Protein kinase, catalytic domain;Concanavalin A-like lectin/glucanase, subgroup	AT5G10290.1		leucine-rich repeat transmembrane protein kinase family protein	LOC_Os02g18320.1	BRASSINOSTEROID INSENSITIVE 1-associated receptor kinase 1 precursor, putative, expressed	Zm00001d015971_T004; Zm00001d015971_T006	AC217401.3_FGT003; GRMZM2G176922_T02	Bradi3g10397.1	Sobic.004G128200.3; Sobic.001G123000.3	Seita.1G128400.1; Seita.9G125200.1
Sevir.4G240900	17.17	23.78	36.8	26.35	37.25	25.23	1.15	1.43	2.36	3.39	6.88	2.97	NA	probable LRR receptor-like serine/threonine-protein kinase At1g14390-like	Protein kinase-like domain;Leucine-rich repeat;Serine-threonine/tyrosine-protein kinase catalytic domain;Protein kinase, catalytic domain	AT1G14390.1		Leucine-rich repeat protein kinase family protein	LOC_Os06g38970.1	expressed protein	Zm00001d046488_T001; Zm00001d046488_T002	GRMZM2G009995_T01; GRMZM2G054949_T01	Bradi1g37210.1	Sobic.010G177100.1	Seita.4G229500.1
Sevir.5G209900	28.42	22.45	17.05	30.39	36.79	25.39	5.17	2.11	1.44	3.21	3.13	5.56	NA	LRR receptor-like serine/threonine-protein kinase GSO1-like	Leucine-rich repeat-containing N-terminal, type 2;Protein kinase-like domain;Leucine-rich repeat;Serine-threonine/tyrosine-protein kinase catalytic domain;Protein kinase, catalytic domain;Concanavalin A-like lectin/glucanase, subgroup	AT2G45340.1		Leucine-rich repeat protein kinase family protein	LOC_Os01g39600.1	expressed protein	Zm00001d044276_T001; Zm00001d011211_T001	GRMZM2G100911_T01; GRMZM2G165428_T02	Bradi2g41696.3	Sobic.003G196000.2	Seita.5G259500.1; Seita.7G319600.1
Sevir.2G409800	21.34	23.43	25.74	27.38	35.01	25.85	1.22	1.84	2.14	1.54	0.79	2.54	NA		Leucine-rich repeat-containing N-terminal, type 2;Protein kinase-like domain;Leucine-rich repeat;Protein kinase, catalytic domain	AT5G10020.1		Leucine-rich receptor-like protein kinase family protein	LOC_Os07g43350.1	expressed protein	Zm00001d022201_T002; Zm00001d006917_T001	GRMZM2G081857_T01; GRMZM2G162781_T01	Bradi1g20750.1; Bradi1g21337.3	Sobic.002G383100.1	Seita.2G398100.1
Sevir.1G381200	20.58	21.62	24.3	31.78	29.26	27.85	0.7	0.72	1.75	2.13	1.71	3.13	NA	leucine-rich repeat-containing protein 40-like	Leucine-rich repeat, typical subtype;Leucine-rich repeat	AT3G15410.1		Leucine-rich repeat (LRR) family protein	LOC_Os02g58030.1	leucine-rich repeat-containing protein 40, putative, expressed	Zm00001d018525_T001; Zm00001d018525_T006	GRMZM2G015090_T01; GRMZM2G087444_T01	Bradi3g56757.1	Sobic.004G353400.1	Seita.1G374600.1
Sevir.2G401400	12.54	18.89	25.06	32.55	33.81	27.79	1.05	1.64	3.19	5.99	2.77	1.84	NA	protein STRUBBELIG-RECEPTOR FAMILY 7-like	Protein kinase, ATP binding site;Leucine-rich repeat-containing N-terminal, type 2;Protein kinase-like domain;Leucine-rich repeat;Serine-threonine/tyrosine-protein kinase catalytic domain;Protein kinase, catalytic domain	AT3G14350.1	SRF7	STRUBBELIG-receptor family 7	LOC_Os07g42626.1	STRUBBELIG-RECEPTOR FAMILY 6 precursor, putative, expressed	Zm00001d022155_T001	GRMZM2G121573_T01	Bradi1g21040.2; Bradi1g60397.2	Sobic.002G376100.1; Sobic.001G346100.1	Seita.2G390900.1; Seita.9G373600.1
Sevir.9G109700	26.08	27.14	25.99	19.8	24.49	26.5	1.76	2.36	5.08	3.26	3.31	2.98	NA	probable LRR receptor-like serine/threonine-protein kinase At2g16250-like	Protein kinase-like domain;Leucine-rich repeat;Serine-threonine/tyrosine-protein kinase catalytic domain;Protein kinase, catalytic domain;Concanavalin A-like lectin/glucanase, subgroup	AT2G16250.1		Leucine-rich repeat protein kinase family protein	LOC_Os03g51440.1	LRR receptor-like protein kinase, putative, expressed	Zm00001d013376_T003; Zm00001d033839_T001	GRMZM2G160619_T01; GRMZM2G143238_T02	Bradi1g10260.1	Sobic.001G108400.1	Seita.9G111400.1
Sevir.5G476700	13.02	13.74	16.2	31.25	41.88	31.52	1.31	2.15	1.49	4.58	6.35	0.7	NA		Protein kinase, ATP binding site;Protein kinase-like domain;Serine/threonine-protein kinase, active site;Serine/threonine- / dual specificity protein kinase, catalytic domain;Serine-threonine/tyrosine-protein kinase catalytic domain;Protein kinase, catalytic domain;Concanavalin A-like lectin/glucanase, subgroup	AT2G37050.3; AT2G37050.3	;	Leucine-rich repeat protein kinase family protein; Leucine-rich repeat protein kinase family protein	LOC_Os12g01200.2; LOC_Os12g01200.3	senescence-induced receptor-like serine/threonine-protein kinase precursor, putative, expressed; senescence-induced receptor-like serine/threonine-protein kinase precursor, putative, expressed	Zm00001d041941_T001	GRMZM2G164502_T01; GRMZM2G465481_T01	Bradi2g62670.2; Bradi3g21580.1	Sobic.003G445900.1	Seita.5G470500.1; Seita.9G303400.1
Sevir.9G362400	25.63	24.71	26.98	22.04	24.58	19.85	0.72	1.73	1.43	3.27	2.05	2.15	NA	somatic embryogenesis receptor kinase 2-like	Leucine-rich repeat-containing N-terminal, type 2;Leucine-rich repeat;Somatic embryogenesis receptor-like kinase	AT5G21090.1		Leucine-rich repeat (LRR) family protein	LOC_Os03g32580.1	BRASSINOSTEROID INSENSITIVE 1-associated receptor kinase 1 precursor, putative, expressed	Zm00001d029597_T002; Zm00001d029597_T003	GRMZM2G084587_T01; GRMZM2G122717_T01	Bradi2g52890.1	Sobic.001G329100.1; Sobic.003G133800.1	Seita.9G356500.1; Seita.5G039000.1
Sevir.8G086600	16.23	13.17	18.25	24.27	39	29.05	3.56	1.99	1.02	2.81	3.67	4.1	BAM1	leucine-rich repeat receptor-like serine/threonine-protein kinase BAM1-like	Leucine-rich repeat-containing N-terminal, type 2;Protein kinase-like domain;Serine/threonine-protein kinase, active site;Leucine-rich repeat, typical subtype;Serine/threonine- / dual specificity protein kinase, catalytic domain;Leucine-rich repeat;Protein kinase, catalytic domain	AT5G65700.1	BAM1	Leucine-rich receptor-like protein kinase family protein	LOC_Os11g12620.1	receptor protein kinase CLAVATA1 precursor, putative, expressed	Zm00001d007254_T001; Zm00001d048968_T001	GRMZM2G169681_T01; GRMZM2G068398_T01	Bradi4g21830.1; Bradi1g30160.1	Sobic.005G091000.1; Sobic.001G446400.1	Seita.8G084800.1; Seita.4G281800.1
Sevir.5G227300	28.2	24.78	21.31	14.13	22.64	27.23	3.23	0.31	2.06	5.18	5.5	4.19	NA	probable inactive receptor kinase At2g26730-like	Leucine-rich repeat-containing N-terminal, type 2;Protein kinase-like domain;Leucine-rich repeat;Protein kinase, catalytic domain	AT2G26730.1		Leucine-rich repeat protein kinase family protein	LOC_Os01g42294.1	inactive receptor kinase At2g26730 precursor, putative, expressed	Zm00001d011312_T001; Zm00001d044434_T001	GRMZM2G339540_T04; GRMZM2G050548_T01	Bradi2g43110.1; Bradi5g03410.1	Sobic.003G214900.1; Sobic.009G251800.1	Seita.5G220500.1; Seita.3G125300.1
Sevir.1G066400	21.45	22.14	20.75	25.64	27.4	19.14	2.12	3.02	1.6	2.36	1.21	1.76	NA	protein STRUBBELIG-RECEPTOR FAMILY 3-like	Leucine-rich repeat-containing N-terminal, type 2;Protein kinase-like domain;Leucine-rich repeat;Serine-threonine/tyrosine-protein kinase catalytic domain;Protein kinase, catalytic domain;Concanavalin A-like lectin/glucanase, subgroup	AT4G03390.1; AT2G20850.1; AT2G20850.1	SRF3; SRF1; SRF1	STRUBBELIG-receptor family 3; STRUBBELIG-receptor family 1; STRUBBELIG-receptor family 1	LOC_Os07g37810.2; LOC_Os02g07960.4; LOC_Os02g07960.3	STRUBBELIG-RECEPTOR FAMILY 1 precursor, putative, expressed; STRUBBELIG-RECEPTOR FAMILY 3 precursor, putative, expressed; STRUBBELIG-RECEPTOR FAMILY 3 precursor, putative, expressed	Zm00001d015435_T011; Zm00001d015435_T002	GRMZM2G335638_T01; GRMZM2G020986_T01	Bradi3g05670.1; Bradi1g31600.1	Sobic.004G060900.1; Sobic.010G217400.2	Seita.1G067300.1
Sevir.3G172700	14.53	25.84	33.57	14.98	23.38	21.39	3.94	3.74	7.21	4.87	2.18	1.71	NA	protein TOO MANY MOUTHS-like	Leucine-rich repeat, typical subtype;Leucine-rich repeat	AT2G42800.1	AtRLP29,RLP29	receptor like protein 29	LOC_Os05g45430.1	TOO MANY MOUTHS precursor, putative, expressed	Zm00001d038742_T001; Zm00001d010813_T001	AC205471.4_FGT008; AC204763.2_FGT001	Bradi2g48820.1	Sobic.009G208300.1; Sobic.001G112800.3	Seita.3G168500.1; Seita.9G287000.1
Sevir.2G048800	17.88	19.17	20.5	20.36	27.69	26.11	1.91	0.44	0.7	2.76	1.12	1.35	NA	NA	NA	AT3G03770.2; AT3G03770.1	;	Leucine-rich repeat protein kinase family protein; Leucine-rich repeat protein kinase family protein	LOC_Os07g07230.1; LOC_Os07g07230.1	protein kinase, putative, expressed; protein kinase, putative, expressed	Zm00001d018883_T001; Zm00001d034405_T015	GRMZM5G860810_T02; GRMZM2G120657_T02	Bradi1g56540.4	Sobic.002G045200.2	Seita.2G044400.1
Sevir.5G322400	20.91	26.91	31.1	14.39	25.63	11.8	0.92	1.91	0.89	6	2.99	2.36	NA	leucine-rich repeat receptor-like protein FASCIATED EAR2-like	Leucine-rich repeat	AT4G18760.1	AtRLP51,RLP51	receptor like protein 51	LOC_Os01g54630.1	leucine rich repeat family protein, putative, expressed	Zm00001d043478_T001	AC203900.3_FGT006; GRMZM2G037482_T01	NA	Sobic.003G296500.2	Seita.5G319200.1
Sevir.3G011700	13.36	14.81	19.2	26.35	31.17	25.43	1.82	1.16	1.87	3.77	0.89	1.68	NA	probable LRR receptor-like serine/threonine-protein kinase At1g63430-like	Leucine-rich repeat-containing N-terminal, type 2;Protein kinase-like domain;Leucine-rich repeat, typical subtype;Serine-threonine/tyrosine-protein kinase catalytic domain;Protein kinase, catalytic domain	AT1G63430.1		Leucine-rich repeat protein kinase family protein	LOC_Os04g58700.1	expressed protein	Zm00001d001786_T004; Zm00001d001786_T003	GRMZM2G119759_T02; GRMZM2G349191_T01	Bradi5g26770.1	Sobic.006G272500.1	Seita.3G010300.1
Sevir.5G367800	20.12	21.42	24.69	16.2	24.52	21.12	2.18	1.45	1.69	2.76	1.47	1.45	NA	probably inactive leucine-rich repeat receptor-like protein kinase At3g28040-like	Protein kinase, ATP binding site;Leucine-rich repeat-containing N-terminal, type 2;Protein kinase-like domain;Leucine-rich repeat, typical subtype;Leucine-rich repeat;Serine-threonine/tyrosine-protein kinase catalytic domain;Protein kinase, catalytic domain	AT3G56370.1		Leucine-rich repeat protein kinase family protein	LOC_Os01g60670.1	receptor-like protein kinase precursor, putative, expressed	Zm00001d043058_T001	GRMZM2G145753_T01	Bradi2g53540.1; Bradi5g13170.3	Sobic.003G338200.1; Sobic.009G174100.1	Seita.5G362400.1
Sevir.5G073000	13.75	14.94	15.55	16.83	20.58	44.02	2.22	1.36	0.85	1.77	0.64	10.1	FEA3	piriformospora indica-insensitive protein 2-like	Leucine-rich repeat, typical subtype;Leucine-rich repeat	AT1G13230.1; AT1G68780.1	;	Leucine-rich repeat (LRR) family protein; RNI-like superfamily protein	LOC_Os01g02060.1; LOC_Os01g02060.2	TOO MANY MOUTHS precursor, putative, expressed; TOO MANY MOUTHS precursor, putative, expressed	Zm00001d040130_T001	GRMZM2G166524_T02	NA	Sobic.003G100200.1; Sobic.003G100400.1	Seita.5G074400.1
Sevir.9G059300	9.07	11.41	15.51	29.01	32.57	25	1.5	2.11	2.3	1.42	2.01	1.58	NA	probable inactive leucine-rich repeat receptor-like protein kinase At3g03770-like	Protein kinase-like domain;Leucine-rich repeat;Serine-threonine/tyrosine-protein kinase catalytic domain;Protein kinase, catalytic domain;Concanavalin A-like lectin/glucanase, subgroup	AT3G03770.2; AT3G03770.1	;	Leucine-rich repeat protein kinase family protein; Leucine-rich repeat protein kinase family protein	LOC_Os03g57780.1; LOC_Os03g57780.1	protein kinase, putative, expressed; protein kinase, putative, expressed	Zm00001d034405_T015; Zm00001d034405_T003	GRMZM2G120657_T02; GRMZM2G148547_T03	Bradi1g06100.1	Sobic.001G061400.1	Seita.9G060300.1
Sevir.3G120800	13.88	13.14	16.2	20.46	35.39	22.29	3.09	2.11	1.55	3.48	2.71	3.59	BAM3	leucine-rich repeat receptor-like serine/threonine-protein kinase BAM3-like	Leucine-rich repeat-containing N-terminal, type 2;Protein kinase-like domain;Serine/threonine-protein kinase, active site;Leucine-rich repeat, typical subtype;Serine/threonine- / dual specificity protein kinase, catalytic domain;Leucine-rich repeat;Protein kinase, catalytic domain	AT4G20270.1	BAM3	Leucine-rich receptor-like protein kinase family protein	LOC_Os05g51740.1	receptor protein kinase CLAVATA1 precursor, putative, expressed	Zm00001d039218_T002; Zm00001d039218_T001	GRMZM2G052111_T01; GRMZM2G068398_T01	Bradi1g69097.1; Bradi1g30160.1	Sobic.009G259500.1; Sobic.001G446400.1	Seita.3G118800.1; Seita.9G480700.1
Sevir.3G008800	19.07	19.09	18.96	16.63	24.2	19.75	3.01	1.74	1.95	3.3	1.26	0.67	NA		Protein kinase, ATP binding site;Leucine-rich repeat-containing N-terminal, type 2;Protein kinase-like domain;Serine/threonine-protein kinase, active site;Leucine-rich repeat, typical subtype;Serine/threonine- / dual specificity protein kinase, catalytic domain;Serine-threonine/tyrosine-protein kinase catalytic domain;Protein kinase, catalytic domain;Concanavalin A-like lectin/glucanase, subgroup	AT2G01820.1		Leucine-rich repeat protein kinase family protein	LOC_Os04g58910.1	receptor protein kinase TMK1 precursor, putative, expressed	Zm00001d026668_T001; Zm00001d026668_T002	GRMZM2G001934_T01; GRMZM5G889927_T01	Bradi5g26550.1	Sobic.006G274866.1	Seita.3G007600.1; Seita.9G115800.1
Sevir.3G252600	20.11	22.62	20.93	18.61	18.26	17.15	2.3	0.46	1.49	2.89	1.03	0.89	NA	NA	NA	AT1G03440.1		Leucine-rich repeat (LRR) family protein	LOC_Os05g33690.3	receptor-like protein kinase precursor, putative, expressed	Zm00001d010304_T001; Zm00001d038153_T001	GRMZM2G099981_T02; GRMZM2G176651_T01	Bradi2g25620.1	Sobic.009G134000.1	Seita.3G246700.1
Sevir.9G426600	13.6	14.57	17.52	16.94	24.74	24.44	1.52	1.7	2.91	2.99	5.25	5.72	NA	probable inactive receptor kinase At5g10020-like	Protein kinase-like domain;Leucine-rich repeat, typical subtype;Leucine-rich repeat;Serine-threonine/tyrosine-protein kinase catalytic domain;Protein kinase, catalytic domain	AT2G27060.1		Leucine-rich repeat protein kinase family protein	LOC_Os03g20450.1	expressed protein	Zm00001d047570_T001; Zm00001d047570_T007	GRMZM2G161664_T01; GRMZM2G361087_T01	NA	Sobic.001G389600.1	Seita.9G422400.1
Sevir.2G335100	12.27	15.34	17.55	19.63	20.91	23.45	1.28	0.98	1.15	2.35	0.36	2.25	NA		Malectin-like carbohydrate-binding domain;Leucine-rich repeat	AT1G28340.1	AtRLP4,RLP4	receptor like protein 4	LOC_Os07g31840.1	leucine-rich repeat family protein, putative, expressed	Zm00001d021566_T005; Zm00001d021566_T007	GRMZM2G163138_T01; GRMZM2G311620_T01	Bradi1g26830.1	Sobic.002G311000.1	Seita.2G323900.1
Sevir.2G147600	15.3	20.89	19.04	13.73	21.81	16.81	1.33	1.82	2.57	5.1	3.64	1.76	NA		Leucine-rich repeat-containing N-terminal, type 2;Protein kinase-like domain;Leucine-rich repeat;Protein kinase, catalytic domain	AT4G37250.1		Leucine-rich repeat protein kinase family protein	LOC_Os09g02250.1	transposon protein, putative, unclassified, expressed	Zm00001d019701_T001; Zm00001d005298_T001	GRMZM2G072868_T01; GRMZM2G163724_T01	Bradi4g08265.1	Sobic.002G142200.1; Sobic.010G202100.1	Seita.2G141900.1; Seita.4G205200.1
Sevir.9G086000	11.29	12.91	15.68	23.97	23.84	18.78	1.13	1.4	1.81	4.02	0.87	1.39	RPK2	LRR receptor-like serine/threonine-protein kinase RPK2-like	Protein kinase, ATP binding site;Leucine-rich repeat-containing N-terminal, type 2;Protein kinase-like domain;Serine/threonine-protein kinase, active site;Leucine-rich repeat, typical subtype;Serine/threonine- / dual specificity protein kinase, catalytic domain;Leucine-rich repeat;Protein kinase, catalytic domain;Concanavalin A-like lectin/glucanase, subgroup	AT3G02130.1	RPK2,TOAD2	receptor-like protein kinase 2	LOC_Os03g54900.1	phytosulfokine receptor precursor, putative, expressed	Zm00001d013251_T001	GRMZM2G072658_T01; GRMZM2G372117_T01	Bradi1g08240.1	Sobic.001G085300.1	Seita.9G087600.1
Sevir.1G022200	4.58	7.41	9.97	20.86	31.14	31.34	1.42	1.68	3.54	4.36	3.3	3.88	NA	probable leucine-rich repeat receptor-like protein kinase At1g68400-like	Leucine-rich repeat-containing N-terminal, type 2;Protein kinase-like domain;Leucine-rich repeat;Protein kinase, catalytic domain	AT2G36570.1		Leucine-rich repeat protein kinase family protein	LOC_Os12g05120.1	receptor kinase, putative, expressed	Zm00001d004929_T001	GRMZM2G046201_T01; GRMZM5G889823_T01	Bradi4g42800.1	Sobic.005G034500.1	Seita.7G319700.1; Seita.8G031300.1
Sevir.3G209200	14.74	17.14	21.35	13.73	21.23	14.87	2.26	1.1	2.59	3.02	2.99	2.72	NA	probably inactive leucine-rich repeat receptor-like protein kinase At3g28040-like	Protein kinase, ATP binding site;Leucine-rich repeat-containing N-terminal, type 2;Protein kinase-like domain;Leucine-rich repeat, typical subtype;Leucine-rich repeat;Serine-threonine/tyrosine-protein kinase catalytic domain;Protein kinase, catalytic domain	AT3G56370.1		Leucine-rich repeat protein kinase family protein	LOC_Os05g40050.1	receptor-like protein kinase 2 precursor, putative, expressed	Zm00001d038481_T001; Zm00001d038481_T002	GRMZM2G128315_T01	Bradi2g53540.1	Sobic.009G174100.1	Seita.3G204200.1
Sevir.6G062400	15.16	11.63	12.58	16.66	26.55	20.37	4.77	1.38	0.38	3.68	3.12	3.65	NA	leucine-rich repeat receptor-like protein kinase TDR-like	Protein kinase, ATP binding site;Leucine-rich repeat-containing N-terminal, type 2;Protein kinase-like domain;Serine/threonine-protein kinase, active site;Leucine-rich repeat, typical subtype;Serine/threonine- / dual specificity protein kinase, catalytic domain;Leucine-rich repeat;Protein kinase, catalytic domain	AT5G61480.1	PXY	Leucine-rich repeat protein kinase family protein	LOC_Os08g05290.1	receptor-like protein kinase 5 precursor, putative, expressed	Zm00001d049588_T001; Zm00001d014971_T001	GRMZM2G039934_T01; GRMZM2G168603_T01	Bradi3g17567.1; Bradi1g30160.1	Sobic.007G038000.1; Sobic.004G008600.1	Seita.6G064400.1; Seita.9G480700.1
Sevir.1G384700	17.98	21.26	18.83	12.65	16.68	13.07	1.56	0.15	1.1	2.89	1.88	2.21	NA	inactive leucine-rich repeat receptor-like serine/threonine-protein kinase At1g60630-like	Protein kinase-like domain;Leucine-rich repeat;Protein kinase, catalytic domain	AT1G60630.1		Leucine-rich repeat protein kinase family protein	LOC_Os02g58390.1	inactive receptor kinase At2g26730 precursor, putative, expressed	Zm00001d018541_T001; Zm00001d018541_T004	GRMZM2G133764_T03; GRMZM2G433709_T01	Bradi3g60600.1; Bradi2g02290.1	Sobic.004G357000.1	Seita.1G378000.1; Seita.7G319700.1
Sevir.8G194400	13.96	16.01	11.87	30.27	15.31	11.7	1.46	2.69	0.81	12.74	2.47	0.89	NA	NA	NA	AT5G10290.1		leucine-rich repeat transmembrane protein kinase family protein	LOC_Os11g39370.1	BRASSINOSTEROID INSENSITIVE 1-associated receptor kinase 1 precursor, putative, expressed	Zm00001d048877_T002; Zm00001d048877_T004	GRMZM5G867798_T01	NA	Sobic.005G182400.1	Seita.8G186000.1
Sevir.5G182700	12.91	15.84	18.22	15.26	20.25	16	1.2	1.1	1.14	1.38	1.85	0.61	NA	probable inactive leucine-rich repeat receptor-like protein kinase At1g66830-like	Leucine-rich repeat-containing N-terminal, type 2;Protein kinase-like domain;Tyrosine-protein kinase, active site;Leucine-rich repeat;Protein kinase, catalytic domain	AT2G01210.1		Leucine-rich repeat protein kinase family protein	LOC_Os01g33090.1	expressed protein	NA	GRMZM2G409893_T01	Bradi2g13790.1	Sobic.003G174700.1	Seita.5G181100.1; Seita.7G330300.1
Sevir.6G114000	18.09	19.18	17.53	12.1	17.13	13.31	1.45	1.28	1.46	2.44	1.25	1.36	NA	probable LRR receptor-like serine/threonine-protein kinase At2g24230-like	Protein kinase-like domain;Leucine-rich repeat, typical subtype;Leucine-rich repeat;Serine-threonine/tyrosine-protein kinase catalytic domain;Protein kinase, catalytic domain;Concanavalin A-like lectin/glucanase, subgroup	AT2G24230.1		Leucine-rich repeat protein kinase family protein	LOC_Os08g17410.1	BRASSINOSTEROID INSENSITIVE 1 precursor, putative, expressed	Zm00001d050148_T001	GRMZM2G141355_T01	Bradi3g19650.1	Sobic.007G113300.1	Seita.6G103800.1
Sevir.5G094700	16.68	16.9	16.72	13.06	16.62	17.27	0.71	0.13	1.12	0.9	1.23	0.68	NA	probable LRR receptor-like serine/threonine-protein kinase At2g28960-like	Malectin-like carbohydrate-binding domain	AT1G25570.1		Di-glucose binding protein with Leucine-rich repeat domain	LOC_Os01g04720.1	leucine-rich repeat protein-related, putative, expressed	Zm00001d039911_T001; Zm00001d039911_T002	GRMZM2G022897_T01	Bradi2g02700.1	Sobic.003G078300.1	Seita.5G096500.1
Sevir.1G023600	12.21	13.83	14.58	20.1	18.71	16.27	0.71	0.87	1.11	2.57	0.87	0.78	CIK4	probable LRR receptor-like serine/threonine-protein kinase At5g45780-like	Protein kinase, ATP binding site;Leucine-rich repeat-containing N-terminal, type 2;Protein kinase-like domain;Serine/threonine-protein kinase, active site;Serine/threonine- / dual specificity protein kinase, catalytic domain;Leucine-rich repeat;Protein kinase, catalytic domain;Concanavalin A-like lectin/glucanase, subgroup	AT5G45780.1		Leucine-rich repeat protein kinase family protein	LOC_Os02g14120.1	BRASSINOSTEROID INSENSITIVE 1-associated receptor kinase 1 precursor, putative, expressed	Zm00001d016197_T001; Zm00001d037840_T001	GRMZM2G146794_T02; GRMZM2G136161_T01	Bradi3g09060.2	Sobic.004G104800.1; Sobic.003G051100.1	Seita.1G023400.1
Sevir.9G379100	8.51	11.2	14.13	18.2	20.51	20.94	0.75	0.67	2	3.12	1.78	1.99	NA		Protein kinase, ATP binding site;Leucine-rich repeat-containing N-terminal, type 2;Protein kinase-like domain;Leucine-rich repeat, typical subtype;Leucine-rich repeat;Serine-threonine/tyrosine-protein kinase catalytic domain;Protein kinase, catalytic domain;Concanavalin A-like lectin/glucanase, subgroup	AT3G14350.1	SRF7	STRUBBELIG-receptor family 7	LOC_Os07g42626.1	STRUBBELIG-RECEPTOR FAMILY 6 precursor, putative, expressed	NA	NA	Bradi1g60397.2	Sobic.001G346100.1; Sobic.001G480800.1	Seita.9G373600.1; Seita.2G390900.1
Sevir.9G155900	17.86	16.84	13.52	14.53	14.24	12.91	2.64	1.99	1.84	4.16	0.84	3.06	NA		Leucine-rich repeat, typical subtype;Leucine-rich repeat	AT2G42800.1	AtRLP29,RLP29	receptor like protein 29	LOC_Os01g52880.1	leucine-rich repeat family protein, putative, expressed	Zm00001d033230_T001; Zm00001d038494_T016	AC185504.4_FGT002; GRMZM2G375163_T01	Bradi1g13793.1	Sobic.001G155800.1; Sobic.004G222100.1	Seita.9G157300.1
Sevir.3G021300	9.12	11.01	15.87	14.41	21.4	14.05	1.48	0.14	0.3	0.79	1.09	1.11	NA	phytosulfokine receptor 1-like	Protein kinase, ATP binding site;Leucine-rich repeat-containing N-terminal, type 2;Protein kinase-like domain;Serine/threonine-protein kinase, active site;Leucine-rich repeat, typical subtype;Serine/threonine- / dual specificity protein kinase, catalytic domain;Leucine-rich repeat;Protein kinase, catalytic domain;Concanavalin A-like lectin/glucanase, subgroup	AT2G02220.1	ATPSKR1,PSKR1	phytosulfokin receptor 1	LOC_Os04g57630.1	phytosulfokine receptor precursor, putative, expressed	Zm00001d001877_T001; Zm00001d033299_T001	GRMZM2G452142_T01; GRMZM2G507763_T01	Bradi5g25790.1	Sobic.006G262400.1; Sobic.006G262700.1	Seita.3G019900.1
Sevir.7G036700	11.46	12.59	13.93	17.03	17.86	11.53	1.48	1.42	2.12	0.53	0.49	0.75	NA	probable LRR receptor-like serine/threonine-protein kinase At1g06840-like	Protein kinase, ATP binding site;Leucine-rich repeat-containing N-terminal, type 2;Protein kinase-like domain;Serine/threonine-protein kinase, active site;Leucine-rich repeat, typical subtype;Serine/threonine- / dual specificity protein kinase, catalytic domain;Leucine-rich repeat;Protein kinase, catalytic domain;Concanavalin A-like lectin/glucanase, subgroup	AT1G06840.1; AT1G06840.1	;	Leucine-rich repeat protein kinase family protein; Leucine-rich repeat protein kinase family protein	LOC_Os01g72990.2; LOC_Os01g72990.1	expressed protein; expressed protein	Zm00001d004559_T008; Zm00001d004559_T010	GRMZM2G165597_T01; AC191283.3_FGT004	Bradi2g62790.2	Sobic.006G000600.1	Seita.7G002200.1; Seita.3G202400.1
Sevir.7G168000	6.66	9.49	14.69	15.36	20.52	16.43	0.96	0.1	1.61	1.03	1.92	1.68	NA	probable leucine-rich repeat receptor-like protein kinase At2g33170-like	Leucine-rich repeat-containing N-terminal, type 2;Protein kinase-like domain;Serine/threonine-protein kinase, active site;Leucine-rich repeat, typical subtype;Serine/threonine- / dual specificity protein kinase, catalytic domain;Leucine-rich repeat;Protein kinase, catalytic domain;Concanavalin A-like lectin/glucanase, subgroup	AT5G63930.1		Leucine-rich repeat protein kinase family protein	LOC_Os04g42700.1	receptor-like protein kinase precursor, putative, expressed	Zm00001d003101_T009; Zm00001d003101_T006	GRMZM2G082191_T01	Bradi5g15070.1	Sobic.006G140000.1	Seita.7G159400.1
Sevir.4G157500	11.58	10.05	11.21	15.95	16.9	16.23	1.47	1.14	0.94	1.63	1.21	2.08	NA	protein STRUBBELIG-RECEPTOR FAMILY 3-like	Protein kinase-like domain;Leucine-rich repeat;Serine-threonine/tyrosine-protein kinase catalytic domain;Protein kinase, catalytic domain	AT2G20850.1	SRF1	STRUBBELIG-receptor family 1	LOC_Os06g45020.1	STRUBBELIG-RECEPTOR FAMILY 3 precursor, putative, expressed	Zm00001d046889_T001; Zm00001d046889_T007	GRMZM2G085246_T02	Bradi1g31600.1	Sobic.010G217400.2	Seita.4G189100.1
Sevir.1G227500	12.86	15.23	16.55	10.01	14.63	10.69	0.25	2.58	0.96	1.76	1.07	1.31	FEA2	leucine-rich repeat receptor-like protein FASCIATED EAR2-like	Leucine rich repeat 4;Leucine-rich repeat-containing N-terminal, type 2;Leucine-rich repeat, typical subtype;Leucine-rich repeat	AT1G65380.1	AtRLP10,CLV2	Leucine-rich repeat (LRR) family protein	LOC_Os02g39100.1	fasciated ear2, putative, expressed	Zm00001d051012_T001	GRMZM2G104925_T01	Bradi3g48060.1	Sobic.004G207000.1	Seita.1G223600.1
Sevir.1G025800	10.05	8.21	8	19.59	17.86	16.11	0.78	1.05	0.55	3.27	1.56	2.46	NA	probable LRR receptor-like serine/threonine-protein kinase At1g53440-like	Malectin;Protein kinase-like domain;Serine/threonine-protein kinase, active site;Serine/threonine- / dual specificity protein kinase, catalytic domain;Leucine-rich repeat;Serine-threonine/tyrosine-protein kinase catalytic domain;Protein kinase, catalytic domain;Concanavalin A-like lectin/glucanase, subgroup	AT1G53440.1		Leucine-rich repeat transmembrane protein kinase	LOC_Os02g13850.1	leucine-rich repeat-containing protein kinase family protein, putative, expressed	Zm00001d016242_T002; Zm00001d016242_T001	GRMZM2G424519_T01; GRMZM2G148567_T01	Bradi3g08917.7	Sobic.004G102100.1	Seita.1G025400.1; Seita.1G025600.1
Sevir.6G068000	10.95	10.8	14.32	15.16	13.69	12.61	1.32	0.83	1.39	1.37	1.55	1.85	NA	probable leucine-rich repeat receptor-like serine/threonine-protein kinase At5g15730-like	Protein kinase-like domain;Serine/threonine-protein kinase, active site;Serine/threonine- / dual specificity protein kinase, catalytic domain;Serine-threonine/tyrosine-protein kinase catalytic domain;Protein kinase, catalytic domain;Concanavalin A-like lectin/glucanase, subgroup	AT5G54590.2; AT5G54590.2	CRLK1; CRLK1	Protein kinase superfamily protein; Protein kinase superfamily protein	LOC_Os08g04420.2; LOC_Os08g04420.1	tyrosine protein kinase domain containing protein, putative, expressed; tyrosine protein kinase domain containing protein, putative, expressed	NA	NA	Bradi3g14620.1	Sobic.007G034100.1; Sobic.007G039828.1	Seita.6G069200.1
Sevir.4G057500	9.67	11.75	12.67	14.01	15.47	13.78	0.57	0.93	0.99	1.24	2.81	1.35	NA	probable LRR receptor-like serine/threonine-protein kinase At1g56130-like	Malectin	AT1G56140.1		Leucine-rich repeat transmembrane protein kinase	LOC_Os06g07130.1	SHR5-receptor-like kinase, putative, expressed	Zm00001d036318_T001	GRMZM2G103033_T04	Bradi1g48230.1	Sobic.010G054100.1	Seita.4G059400.1; Seita.1G265500.1
Sevir.5G316300	16	14.39	14	9.71	11.73	10.61	1.89	1.42	2.08	1.37	0.18	0.5	NA	receptor-like protein kinase HSL1-like	Protein kinase, ATP binding site;Leucine-rich repeat-containing N-terminal, type 2;Protein kinase-like domain;Serine/threonine-protein kinase, active site;Leucine-rich repeat, typical subtype;Serine/threonine- / dual specificity protein kinase, catalytic domain;Leucine-rich repeat;Serine-threonine/tyrosine-protein kinase catalytic domain;Protein kinase, catalytic domain	AT5G25930.1		Protein kinase family protein with leucine-rich repeat domain	LOC_Os01g53920.1	receptor-like protein kinase 5 precursor, putative, expressed	Zm00001d043512_T001; Zm00001d012769_T001	GRMZM2G177883_T01; AC233967.1_FGT005	Bradi2g49447.2; Bradi2g62670.2	Sobic.003G291700.1; Sobic.003G291600.1	Seita.5G313500.1; Seita.5G206400.1
Sevir.2G375200	17.5	17.72	12.34	9.29	10.12	9.29	1.93	1.14	0.89	1.94	1.07	1.07	NA	probable leucine-rich repeat receptor-like protein kinase At1g68400-like	Protein kinase, ATP binding site;Leucine-rich repeat-containing N-terminal, type 2;Protein kinase-like domain;Protein kinase, catalytic domain	AT1G68400.1		leucine-rich repeat transmembrane protein kinase family protein	LOC_Os07g38640.1	inactive receptor kinase At2g26730 precursor, putative, expressed	Zm00001d021883_T001	GRMZM2G006505_T01; GRMZM5G889731_T01	Bradi1g23890.1	Sobic.002G349500.1; Sobic.005G034500.1	Seita.2G364000.1; Seita.1G332200.1
Sevir.4G192800	7.13	6.95	8.9	16.57	14.57	21.22	0.4	0.59	0.33	2.82	2.06	1.16	NA	probable leucine-rich repeat receptor-like serine/threonine-protein kinase At5g15730-like	Protein kinase-like domain;Serine/threonine-protein kinase, active site;Serine/threonine- / dual specificity protein kinase, catalytic domain;Serine-threonine/tyrosine-protein kinase catalytic domain;Protein kinase, catalytic domain	AT5G15730.2; AT5G15730.2	;	Protein kinase superfamily protein; Protein kinase superfamily protein	LOC_Os06g17285.1; LOC_Os06g17285.2	protein kinase, putative, expressed; protein kinase, putative, expressed	Zm00001d045756_T001	GRMZM2G408376_T01	Bradi1g43580.1	Sobic.010G118100.1	Seita.4G124400.1
Sevir.2G184200	4.97	12.7	17.19	10.93	19.54	9.63	1.27	0.5	3.51	1.21	1.31	1.19	NA	receptor-like protein kinase HSL1-like	Leucine-rich repeat-containing N-terminal, type 2;Protein kinase-like domain;Serine/threonine-protein kinase, active site;Leucine-rich repeat, typical subtype;Serine/threonine- / dual specificity protein kinase, catalytic domain;Leucine-rich repeat;Protein kinase, catalytic domain	AT1G28440.1	HSL1	HAESA-like 1	LOC_Os09g15700.1	receptor-like protein kinase 5 precursor, putative, expressed	Zm00001d020101_T001	GRMZM2G110685_T01	Bradi4g28107.1	Sobic.002G172200.1; Sobic.002G172100.1	Seita.2G177600.1; Seita.8G071500.1
Sevir.9G319400	7.19	8.39	10.69	13.97	15.61	19.1	0.26	0.48	1.28	1.95	2.29	1.37	NA	leucine-rich repeat-containing protein 1-like	Leucine-rich repeat, typical subtype;Leucine-rich repeat	AT4G35470.1; AT4G35470.1	PIRL4; PIRL4	plant intracellular ras group-related LRR 4; plant intracellular ras group-related LRR 4	LOC_Os10g42190.1; LOC_Os10g42190.2	leucine rich repeat containing protein, expressed; leucine rich repeat containing protein, expressed	Zm00001d047045_T001; Zm00001d030062_T001	GRMZM2G160454_T01	Bradi3g33990.1	Sobic.001G290200.1	Seita.9G313300.1
Sevir.4G120600	11.54	13.55	10.87	9.5	12.94	15.99	2.55	1.01	1.46	2.37	1.47	1.62	NA	probable LRR receptor-like serine/threonine-protein kinase At4g20940-like	Leucine-rich repeat-containing N-terminal, type 2;Leucine-rich repeat	AT3G17640.1		Leucine-rich repeat (LRR) family protein	LOC_Os06g28480.1	polygalacturonase inhibitor 1 precursor, putative, expressed	Zm00001d039177_T001	GRMZM2G167786_T01	NA	Sobic.009G254400.1	Seita.4G154100.1
Sevir.6G211400	12.18	6.36	5.33	11.68	13.08	25.64	1.8	0.92	0.46	1.72	3.48	7.81	NA	DNA-damage-repair/toleration protein DRT100-like	Leucine-rich repeat-containing N-terminal, type 2;Leucine-rich repeat, typical subtype;Leucine-rich repeat	AT3G12610.1	DRT100	Leucine-rich repeat (LRR) family protein	LOC_Os08g39550.1	polygalacturonase inhibitor 2 precursor, putative, expressed	Zm00001d031434_T001	GRMZM2G121312_T01	NA	Sobic.007G211400.1	Seita.6G204300.1
Sevir.9G561300	10.69	11.59	13.34	10.58	14.02	11.3	1.17	1.18	1.96	2.66	1.4	0.73	NA	probable LRR receptor-like serine/threonine-protein kinase At1g12460-like	Leucine-rich repeat-containing N-terminal, type 2;Protein kinase-like domain;Leucine-rich repeat;Protein kinase, catalytic domain	AT1G12460.1		Leucine-rich repeat protein kinase family protein	LOC_Os03g03570.2	leucine-rich repeat transmembrane protein kinase, putative, expressed	Zm00001d027463_T001; Zm00001d048453_T001	GRMZM2G371137_T01; GRMZM2G172014_T02	Bradi1g76660.1	Sobic.001G522300.1	Seita.9G557200.1
Sevir.6G258300	12.72	12.2	11.83	10.53	15.49	8.04	1.65	2.16	0.72	1.91	1.64	1.88	NA	putative kinase-like protein TMKL1-like	Protein kinase-like domain;Leucine-rich repeat;Serine-threonine/tyrosine-protein kinase catalytic domain;Protein kinase, catalytic domain	AT3G24660.1	TMKL1	transmembrane kinase-like 1	LOC_Os08g45060.1	protein Kinase-like protein TMKL1 precursor, putative, expressed	Zm00001d031866_T001	GRMZM2G422373_T01	Bradi3g12650.1	Sobic.007G163400.1	Seita.6G253800.1
Sevir.2G391700	8.75	9.2	11.08	11.78	16.57	10.32	0.75	0.61	0.89	1.99	0.43	1.28	RPK2	LRR receptor-like serine/threonine-protein kinase RPK2-like	Protein kinase, ATP binding site;Leucine-rich repeat-containing N-terminal, type 2;Protein kinase-like domain;Serine/threonine-protein kinase, active site;Leucine-rich repeat, typical subtype;Serine/threonine- / dual specificity protein kinase, catalytic domain;Leucine-rich repeat;Protein kinase, catalytic domain;Concanavalin A-like lectin/glucanase, subgroup	AT3G02130.1	RPK2,TOAD2	receptor-like protein kinase 2	LOC_Os07g41140.1	receptor-like protein kinase precursor, putative, expressed	Zm00001d022066_T001; Zm00001d013251_T001	GRMZM2G017409_T01; GRMZM2G072658_T01	Bradi1g22200.3	Sobic.002G366900.2; Sobic.001G085300.1	Seita.2G381400.1
Sevir.3G208000	10.76	9.61	10.03	9.9	13.85	13.55	0.98	1.27	1.33	0.95	1.37	0.8	NA	probable inactive receptor kinase At5g58300-like	Protein kinase, ATP binding site;Leucine-rich repeat-containing N-terminal, type 2;Protein kinase-like domain;Leucine-rich repeat, typical subtype;Leucine-rich repeat;Serine-threonine/tyrosine-protein kinase catalytic domain;Protein kinase, catalytic domain;Concanavalin A-like lectin/glucanase, subgroup	AT5G58300.1; AT5G58300.2	;	Leucine-rich repeat protein kinase family protein; Leucine-rich repeat protein kinase family protein	LOC_Os05g40200.1; LOC_Os05g40200.1	inactive receptor kinase At2g26730 precursor, putative, expressed; inactive receptor kinase At2g26730 precursor, putative, expressed	Zm00001d038487_T003; Zm00001d038487_T004	AC214817.3_FGT004; AC218972.3_FGT004	Bradi2g22180.1; Bradi2g53420.5	Sobic.009G175100.1; Sobic.003G336900.1	Seita.3G202900.1; Seita.5G360800.1
Sevir.6G084300	7.75	8.56	10.91	10.08	15.52	14.2	1.44	0.89	0.97	1.72	1.17	1.42	NA	probable LRR receptor-like serine/threonine-protein kinase At1g53440-like	Leucine-rich repeat-containing N-terminal, type 2;Protein kinase-like domain;Leucine-rich repeat, typical subtype;Leucine-rich repeat;Serine-threonine/tyrosine-protein kinase catalytic domain;Protein kinase, catalytic domain;Concanavalin A-like lectin/glucanase, subgroup	AT2G45340.1		Leucine-rich repeat protein kinase family protein	LOC_Os08g02440.1	expressed protein	Zm00001d048070_T001; Zm00001d035097_T001	GRMZM2G045981_T01; GRMZM2G125081_T01	Bradi3g13827.1	Sobic.007G019600.1	Seita.6G084700.1
Sevir.9G072400	9.12	11.93	16.04	9.81	11.28	8.17	0.38	1	1.56	0.52	1.14	0.88	NA	probable LRR receptor-like serine/threonine-protein kinase At2g16250-like	Leucine-rich repeat-containing N-terminal, type 2;Protein kinase-like domain;Leucine-rich repeat;Serine-threonine/tyrosine-protein kinase catalytic domain;Protein kinase, catalytic domain;Concanavalin A-like lectin/glucanase, subgroup;Tyrosine-protein kinase, catalytic domain	AT2G16250.1		Leucine-rich repeat protein kinase family protein	LOC_Os03g56250.1	LRR receptor-like protein kinase, putative, expressed	Zm00001d034237_T001	AC235547.1_FGT005	Bradi1g07200.1; Bradi1g57910.1	Sobic.001G074200.1	Seita.9G073700.1
Sevir.8G112700	7.78	8.11	9.1	10.56	14.5	15.05	0.91	1.05	0.88	1.04	1.16	1.39	NA	probable inactive leucine-rich repeat receptor-like protein kinase At3g03770-like	Protein kinase-like domain;Leucine-rich repeat, typical subtype;Leucine-rich repeat;Protein kinase, catalytic domain;Concanavalin A-like lectin/glucanase, subgroup	AT5G14210.1		Leucine-rich repeat protein kinase family protein	LOC_Os11g20360.2	expressed protein	Zm00001d048958_T003; Zm00001d048958_T002	GRMZM2G113373_T01; EF517601.1_FGT001	Bradi4g20000.1	Sobic.005G092700.1	Seita.8G109000.1
Sevir.9G460000	8.14	8.28	9.46	11.91	11.35	12.7	1.13	0.08	0.4	1.81	1.08	0.6	NA	probable leucine-rich repeat receptor-like serine/threonine-protein kinase At3g14840-like	Protein kinase, ATP binding site;Protein kinase-like domain;Serine/threonine-protein kinase, active site;Serine/threonine- / dual specificity protein kinase, catalytic domain;Protein kinase, catalytic domain;Concanavalin A-like lectin/glucanase, subgroup	AT3G09010.1		Protein kinase superfamily protein	LOC_Os03g15770.1	tyrosine protein kinase domain containing protein, putative, expressed	Zm00001d028535_T001; Zm00001d047853_T003	GRMZM2G161452_T01; GRMZM2G083402_T01	Bradi1g67247.1	Sobic.001G427800.1	Seita.9G456400.1
Sevir.5G464800	16.98	13.7	8.95	4.84	8.04	8.98	6.16	2.45	1.1	1.53	1.1	1.87	NA	probably inactive leucine-rich repeat receptor-like protein kinase At3g28040-like	Protein kinase, ATP binding site;Leucine-rich repeat-containing N-terminal, type 2;Protein kinase-like domain;Serine/threonine-protein kinase, active site;Leucine-rich repeat, typical subtype;Serine/threonine- / dual specificity protein kinase, catalytic domain;Leucine-rich repeat;Protein kinase, catalytic domain	AT3G28040.1		Leucine-rich receptor-like protein kinase family protein	LOC_Os01g72700.1	expressed protein	Zm00001d042051_T001; Zm00001d011834_T001	GRMZM2G138338_T01; GRMZM2G059117_T01	Bradi2g61247.1	Sobic.003G432000.1	Seita.5G458200.1; Seita.1G118600.1
Sevir.6G030000	8.32	9.01	10.56	12.86	10.34	10.28	0.39	1.08	1.66	1.56	1.42	1.84	NA	probable LRR receptor-like serine/threonine-protein kinase At1g56130-like	Protein kinase, ATP binding site;Protein kinase-like domain;Serine/threonine-protein kinase, active site;Serine/threonine- / dual specificity protein kinase, catalytic domain;Serine-threonine/tyrosine-protein kinase catalytic domain;Protein kinase, catalytic domain;Concanavalin A-like lectin/glucanase, subgroup	AT1G16670.1; AT1G16670.1	;	Protein kinase superfamily protein; Protein kinase superfamily protein	LOC_Os08g10070.2; LOC_Os08g10070.1	protein kinase, putative, expressed; protein kinase, putative, expressed	Zm00001d049391_T001; Zm00001d049391_T002	GRMZM2G003662_T02	Bradi3g17620.2	Sobic.007G071100.1; Sobic.002G169633.1	Seita.6G032500.1; Seita.7G240400.1
Sevir.2G037800	8.31	8.66	9.67	9.38	14.26	8.75	1.31	0.78	0.55	2.19	1.12	1.1	NA	leucine-rich repeat receptor-like serine/threonine-protein kinase At1g17230-like	Leucine-rich repeat-containing N-terminal, type 2;Protein kinase-like domain;Serine/threonine-protein kinase, active site;Leucine-rich repeat, typical subtype;Serine/threonine- / dual specificity protein kinase, catalytic domain;Leucine-rich repeat;Protein kinase, catalytic domain;Concanavalin A-like lectin/glucanase, subgroup	AT1G17230.1		Leucine-rich receptor-like protein kinase family protein	LOC_Os07g05740.1	receptor-like protein kinase 2 precursor, putative, expressed	Zm00001d018807_T001	NA	Bradi1g58460.1; Bradi1g78390.12	Sobic.002G035600.1	Seita.2G033100.1
Sevir.7G292500	4.41	5.57	7.88	11.52	13.75	11.18	0.39	0.6	0.58	2.34	1.48	0.67	NA	leucine-rich repeat receptor-like tyrosine-protein kinase At2g41820-like	Protein kinase-like domain;Leucine-rich repeat, typical subtype;Leucine-rich repeat;Protein kinase, catalytic domain	AT1G34420.1		leucine-rich repeat transmembrane protein kinase family protein	LOC_Os12g08180.1	receptor-like protein kinase 2 precursor, putative, expressed	Zm00001d023608_T001	GRMZM2G059214_T01	Bradi4g40990.2	Sobic.008G060000.1; Sobic.008G060500.2	Seita.7G281600.1; Seita.7G281500.1
Sevir.4G240700	6.12	8.81	11.83	7.76	12.24	7.05	0.79	0.18	1.74	1.8	1.19	0.71	NA	probable LRR receptor-like serine/threonine-protein kinase At1g34110-like	Protein kinase, ATP binding site;Leucine-rich repeat-containing N-terminal, type 2;Protein kinase-like domain;Serine/threonine-protein kinase, active site;Leucine-rich repeat, typical subtype;Serine/threonine- / dual specificity protein kinase, catalytic domain;Leucine-rich repeat;Protein kinase, catalytic domain	AT1G34110.1		Leucine-rich receptor-like protein kinase family protein	LOC_Os06g38990.1	receptor-like protein kinase 2 precursor, putative, expressed	Zm00001d046485_T001; Zm00001d001840_T001	GRMZM2G148702_T01; AC194873.3_FGT006	Bradi1g37190.1; Bradi3g39150.1	Sobic.010G177300.1; Sobic.006G013300.1	Seita.4G229300.1; Seita.6G194500.1
Sevir.3G101800	8.62	9.93	7.63	6.24	10.25	7.06	1.56	1.9	1.11	2.61	1.69	0.6	NA	LRR receptor-like serine/threonine-protein kinase GSO1-like	Leucine-rich repeat-containing N-terminal, type 2;Leucine-rich repeat, typical subtype;Leucine-rich repeat	AT4G20140.1	GSO1	Leucine-rich repeat transmembrane protein kinase	LOC_Os05g07820.1	leucine-rich repeat receptor protein kinase EXS precursor, putative, expressed	Zm00001d037666_T001	GRMZM2G131749_T01	Bradi2g34337.2	Sobic.009G061400.1	Seita.3G101400.1
Sevir.6G100600	4.91	9.38	10.57	6	11.2	6.97	1.12	1.25	2.24	3.05	1.64	1.38	NA		Leucine-rich repeat-containing N-terminal, type 2;Protein kinase-like domain;Serine/threonine-protein kinase, active site;Serine/threonine- / dual specificity protein kinase, catalytic domain;Leucine-rich repeat;Protein kinase, catalytic domain	AT1G28440.1	HSL1	HAESA-like 1	LOC_Os08g28870.1	receptor-like protein kinase 5 precursor, putative, expressed	Zm00001d032344_T001; Zm00001d036972_T001	GRMZM2G136353_T01; GRMZM5G840780_T01	Bradi3g35137.1; Bradi3g17567.1	Sobic.007G115400.1; Sobic.010G267700.1	Seita.6G129800.1; Seita.3G118800.1
Sevir.6G172400	6.23	6.66	7.18	7.08	10.29	11.35	0.91	0.45	0.98	1.77	2.17	2.44	NA	receptor-like protein kinase-like	Protein kinase, ATP binding site;Leucine-rich repeat-containing N-terminal, type 2;Protein kinase-like domain;Serine/threonine-protein kinase, active site;Leucine-rich repeat, typical subtype;Serine/threonine- / dual specificity protein kinase, catalytic domain;Protein kinase, catalytic domain;Concanavalin A-like lectin/glucanase, subgroup	AT1G73080.1	ATPEPR1,PEPR1	PEP1 receptor 1	LOC_Os08g34640.1	receptor-like protein kinase precursor, putative, expressed	Zm00001d032116_T003; Zm00001d032116_T005	GRMZM2G428554_T01; GRMZM2G011806_T01	Bradi3g34470.1; Bradi3g37216.4	Sobic.007G144600.1; Sobic.007G144700.2	Seita.6G166800.1; Seita.6G166900.1
Sevir.6G162300	2.88	5.58	9.54	8.21	11.68	9.38	0.71	0.39	1.05	0.45	0.23	1.2	NA		Leucine-rich repeat-containing N-terminal, type 2;Protein kinase-like domain;Serine/threonine-protein kinase, active site;Leucine-rich repeat, typical subtype;Serine/threonine- / dual specificity protein kinase, catalytic domain;Leucine-rich repeat;Serine-threonine/tyrosine-protein kinase catalytic domain;Protein kinase, catalytic domain;Concanavalin A-like lectin/glucanase, subgroup	AT5G07280.1	EMS1,EXS	Leucine-rich repeat transmembrane protein kinase	LOC_Os01g68870.2	leucine-rich repeat receptor protein kinase EXS precursor, putative, expressed	Zm00001d042362_T007; Zm00001d042362_T001	GRMZM2G447447_T01; GRMZM2G306771_T01	Bradi2g58780.4; Bradi3g06980.5	Sobic.003G402100.3	Seita.6G156200.1; Seita.5G428100.1
Sevir.7G145300	5.28	6.63	7.63	7.22	10.2	8.64	0.84	0.98	0.89	1	0.6	0.75	NA	leucine-rich repeat-containing protein 40-like	Leucine-rich repeat, typical subtype;Leucine-rich repeat	AT3G11330.1	PIRL9	plant intracellular ras group-related LRR 9	LOC_Os04g40080.1	leucine rich repeat containing protein, expressed	Zm00001d025681_T001	GRMZM2G065292_T01	Bradi5g13390.1	Sobic.006G119800.1; Sobic.004G313000.1	Seita.7G136900.1; Seita.1G216400.1
Sevir.4G242000	3.35	3.07	4.18	17.59	12.26	5.02	1.44	0.93	1.28	1.89	2.39	0.58	NA		Protein kinase, ATP binding site;Leucine-rich repeat-containing N-terminal, type 2;Protein kinase-like domain;Serine/threonine-protein kinase, active site;Leucine-rich repeat, typical subtype;Serine/threonine- / dual specificity protein kinase, catalytic domain;Leucine-rich repeat;Serine-threonine/tyrosine-protein kinase catalytic domain;Protein kinase, catalytic domain;Concanavalin A-like lectin…	AT3G47570.1		Leucine-rich repeat protein kinase family protein	LOC_Os06g38670.1	receptor-like protein kinase precursor, putative, expressed	Zm00001d036947_T001	GRMZM2G171114_T01	Bradi3g10600.1	NA	Seita.4G230600.1; Seita.4G230100.1
Sevir.2G331800	2.98	4.96	8.62	7.25	12.96	8.36	0.94	0.92	1.31	3.04	2.22	2.08	NA	LRR receptor-like serine/threonine-protein kinase GSO1-like	Protein kinase, ATP binding site;Leucine-rich repeat-containing N-terminal, type 2;Protein kinase-like domain;Serine/threonine-protein kinase, active site;Leucine-rich repeat, typical subtype;Serine/threonine- / dual specificity protein kinase, catalytic domain;Leucine-rich repeat;Protein kinase, catalytic domain;Concanavalin A-like lectin/glucanase, subgroup	AT4G20140.1	GSO1	Leucine-rich repeat transmembrane protein kinase	LOC_Os07g31500.1	leucine-rich repeat receptor protein kinase EXS precursor, putative, expressed	Zm00001d021535_T001; Zm00001d021535_T003	GRMZM2G313643_T01; GRMZM2G172429_T01	Bradi1g26900.1; Bradi1g33480.1	Sobic.002G308200.1; Sobic.006G158266.1	Seita.2G320400.1; Seita.4G251200.1
Sevir.5G144800	6.42	6.74	7.59	8.4	7.74	7.3	1.32	0.4	1.1	0.55	1.05	0.59	NA	probable LRR receptor-like serine/threonine-protein kinase MRH1-like	Leucine-rich repeat-containing N-terminal, type 2;Protein kinase-like domain;Leucine-rich repeat;Serine-threonine/tyrosine-protein kinase catalytic domain;Protein kinase, catalytic domain	AT4G18640.1; AT5G45840.1	MRH1;	Leucine-rich repeat protein kinase family protein; Leucine-rich repeat protein kinase family protein	LOC_Os01g10900.2; LOC_Os01g10900.2	MRH1, putative, expressed; MRH1, putative, expressed	Zm00001d039406_T001; Zm00001d039406_T002	GRMZM2G346466_T01	NA	Sobic.003G024100.1	Seita.5G146300.1
Sevir.4G144200	9.16	8.95	5.57	6.31	6.53	6.2	0.36	0.95	0.67	1.19	0.53	0.97	NA	probable LRR receptor-like serine/threonine-protein kinase At2g24230-like	Protein kinase-like domain;Leucine-rich repeat;Serine-threonine/tyrosine-protein kinase catalytic domain;Protein kinase, catalytic domain;Concanavalin A-like lectin/glucanase, subgroup	AT5G45800.1	MEE62	Leucine-rich repeat protein kinase family protein	LOC_Os06g35200.1	receptor-like kinase, putative, expressed	Zm00001d046178_T001; Zm00001d053518_T001	GRMZM2G046316_T01; GRMZM2G017022_T01	Bradi1g40980.1; Bradi3g09150.1	Sobic.010G161300.1; Sobic.002G038866.1	Seita.4G175900.1; Seita.1G021900.1
Sevir.1G230900	4.91	6.14	7.24	8.02	9.28	5.87	0.81	0.71	0.38	0.26	0.66	0.92	NA		Leucine-rich repeat-containing N-terminal, type 2;Leucine-rich repeat, typical subtype;Leucine-rich repeat	AT5G20480.1	EFR	EF-TU receptor	LOC_Os02g40240.2	receptor kinase, putative, expressed	NA	NA	NA	NA	Seita.1G227300.1; Seita.2G016400.1
Sevir.3G127900	11.85	4.88	4.21	5.49	7.53	7.44	4.9	0.88	0.27	1.84	1.6	0.5	NA	probable inactive receptor kinase At2g26730-like	Leucine-rich repeat-containing N-terminal, type 2;Protein kinase-like domain;Leucine-rich repeat;Protein kinase, catalytic domain	AT2G26730.1		Leucine-rich repeat protein kinase family protein	LOC_Os01g42294.1	inactive receptor kinase At2g26730 precursor, putative, expressed	Zm00001d039188_T001; Zm00001d011312_T001	GRMZM2G156905_T02; GRMZM2G050548_T01	Bradi5g03410.1; Bradi2g43110.1	Sobic.009G251800.1; Sobic.003G214900.1	Seita.3G125300.1; Seita.5G220500.1
Sevir.4G294000	2.32	6.91	9.38	5.74	8.56	5.52	0.58	0.69	0.98	1.02	1.06	1.22	CLV1/TD1	leucine-rich repeat receptor-like kinase protein THICK TASSEL DWARF1-like	Leucine-rich repeat-containing N-terminal, type 2;Protein kinase-like domain;Serine/threonine-protein kinase, active site;Leucine-rich repeat, typical subtype;Serine/threonine- / dual specificity protein kinase, catalytic domain;Leucine-rich repeat;Serine-threonine/tyrosine-protein kinase catalytic domain;Protein kinase, catalytic domain	AT1G75820.1	ATCLV1,CLV1,FAS3,FLO5	Leucine-rich receptor-like protein kinase family protein	LOC_Os06g50340.1	receptor protein kinase CLAVATA1 precursor, putative, expressed	Zm00001d014793_T001; Zm00001d048968_T001	GRMZM2G300133_T01; GRMZM2G043584_T01	Bradi1g30160.1; Bradi1g69097.1	Sobic.010G267700.1; Sobic.005G091000.1	Seita.4G281800.1; Seita.9G281300.1
Sevir.8G163900	5.08	5.54	6.13	7.95	7.02	6.18	0.38	0.87	1.12	0.47	0.55	0.57	NA	probable LRR receptor-like serine/threonine-protein kinase At1g53440-like	Protein kinase, ATP binding site;Protein kinase-like domain;Serine/threonine-protein kinase, active site;Serine/threonine- / dual specificity protein kinase, catalytic domain;Serine-threonine/tyrosine-protein kinase catalytic domain;Protein kinase, catalytic domain	AT1G11300.1		protein serine/threonine kinases;protein kinases;ATP binding;sugar binding;kinases;carbohydrate binding	LOC_Os10g02360.1	OsWAK98 - OsWAK receptor-like cytoplasmic kinase OsWAK-RLCK, expressed	Zm00001d007477_T001; Zm00001d041363_T003	GRMZM2G159756_T01; GRMZM2G026203_T01	NA	Sobic.005G155100.1; Sobic.005G154800.1	Seita.8G152200.1; Seita.8G152100.1
Sevir.5G067000	5.34	5.86	6.9	4.96	8.51	5.36	0.83	0.64	0.87	0.64	0.23	0.55	RPK2	LRR receptor-like serine/threonine-protein kinase RPK2-like	Protein kinase, ATP binding site;Leucine-rich repeat-containing N-terminal, type 2;Protein kinase-like domain;Serine/threonine-protein kinase, active site;Leucine-rich repeat, typical subtype;Serine/threonine- / dual specificity protein kinase, catalytic domain;Leucine-rich repeat;Serine-threonine/tyrosine-protein kinase catalytic domain;Protein kinase, catalytic domain;Concanavalin A-like lectin…	AT3G02130.1	RPK2,TOAD2	receptor-like protein kinase 2	LOC_Os07g41140.1	receptor-like protein kinase precursor, putative, expressed	NA	NA	Bradi2g03567.1	Sobic.003G107000.1	Seita.5G068100.1
Sevir.3G299800	2.59	3.88	5.06	8.18	9.38	7.71	0.35	0.45	0.57	1.58	0.91	0.4	NA	probable leucine-rich repeat receptor-like protein kinase At5g49770-like	Protein kinase, ATP binding site;Leucine-rich repeat-containing N-terminal, type 2;Protein kinase-like domain;Serine/threonine-protein kinase, active site;Serine/threonine- / dual specificity protein kinase, catalytic domain;Serine-threonine/tyrosine-protein kinase catalytic domain;Protein kinase, catalytic domain;Concanavalin A-like lectin/glucanase, subgroup	AT1G79620.1		Leucine-rich repeat protein kinase family protein	LOC_Os05g24010.1	receptor protein kinase-like, putative, expressed	Zm00001d010448_T001; Zm00001d010448_T005	GRMZM2G080851_T01	Bradi2g36880.4	Sobic.009G079300.1	Seita.3G291300.1; Seita.3G200200.1
Sevir.3G260600	5.89	5.99	7.05	6.37	6.06	4.39	0.47	0.83	0.6	0.65	0.93	0.74	NA	leucine-rich repeat receptor-like serine/threonine-protein kinase At2g14510-like	Malectin-like carbohydrate-binding domain;Leucine-rich repeat-containing N-terminal, type 2	AT3G05990.1		Leucine-rich repeat (LRR) family protein	LOC_Os05g32660.1	leucine-rich repeat family protein, putative, expressed	Zm00001d010480_T001; Zm00001d010480_T002	GRMZM2G145752_T01	Bradi2g26467.1	Sobic.009G127000.1	Seita.3G254000.1; Seita.J000300.1
Sevir.1G050200	5.03	5.61	5.89	6.37	6.66	5.16	0.68	0.84	1.35	1.03	0.41	0.9	NA	leucine-rich repeat receptor protein kinase EXS-like	Protein kinase, ATP binding site;Leucine-rich repeat-containing N-terminal, type 2;Protein kinase-like domain;Serine/threonine-protein kinase, active site;Leucine-rich repeat, typical subtype;Serine/threonine- / dual specificity protein kinase, catalytic domain;Leucine-rich repeat;Protein kinase, catalytic domain;Concanavalin A-like lectin/glucanase, subgroup	AT5G07280.1; AT5G07280.1	EMS1,EXS; EMS1,EXS	Leucine-rich repeat transmembrane protein kinase; Leucine-rich repeat transmembrane protein kinase	LOC_Os01g68870.1; LOC_Os01g68870.2	leucine-rich repeat receptor protein kinase EXS precursor, putative, expressed; leucine-rich repeat receptor protein kinase EXS precursor, putative, expressed	Zm00001d015853_T001	GRMZM2G306771_T01	Bradi3g06980.5	Sobic.004G078400.1	Seita.1G051000.1; Seita.1G050900.1
Sevir.7G142400	3.35	5.01	5.96	6.05	8.78	5.51	0.74	0.46	1.09	2.56	1.32	0.75	NA	probably inactive leucine-rich repeat receptor-like protein kinase At5g06940-like	Protein kinase, ATP binding site;Leucine-rich repeat-containing N-terminal, type 2;Protein kinase-like domain;Serine/threonine-protein kinase, active site;Leucine-rich repeat, typical subtype;Serine/threonine- / dual specificity protein kinase, catalytic domain;Leucine-rich repeat;Protein kinase, catalytic domain	AT5G06940.1		Leucine-rich repeat receptor-like protein kinase family protein	LOC_Os04g39650.1	receptor protein kinase CLAVATA1 precursor, putative, expressed	Zm00001d025674_T001; Zm00001d042320_T001	GRMZM2G123178_T01; GRMZM2G066248_T01	Bradi5g13170.3	Sobic.006G116200.1	Seita.7G134000.1
Sevir.2G005100	6.42	6.62	6.56	3.61	5.26	4.16	0.77	1.04	0.91	1.05	0.66	0.83	NA	phytosulfokine receptor 2-like	Protein kinase, ATP binding site;Protein kinase-like domain;Serine/threonine-protein kinase, active site;Leucine-rich repeat, typical subtype;Serine/threonine- / dual specificity protein kinase, catalytic domain;Leucine-rich repeat;Protein kinase, catalytic domain;Concanavalin A-like lectin/glucanase, subgroup	AT5G53890.1	AtPSKR2,PSKR2	phytosylfokine-alpha receptor 2	LOC_Os07g01710.1	phytosulfokine receptor precursor, putative, expressed	Zm00001d018635_T001	GRMZM2G120574_T01; GRMZM2G421707_T01	Bradi1g59360.1	Sobic.002G006100.1	Seita.2G001000.1
Sevir.8G224500	5.4	7.96	6.08	3.37	4.9	4.42	0.72	0.86	1.01	1.53	0.96	0.33	NA			AT1G03440.1		Leucine-rich repeat (LRR) family protein	LOC_Os11g42450.1	leucine-rich repeat family protein, putative, expressed	Zm00001d048740_T001	GRMZM2G048651_T01	Bradi4g11651.1	Sobic.005G199700.1	Seita.8G213600.1
Sevir.1G075600	2.83	2.28	3.4	8.58	7.81	6.64	0.38	0.42	0.54	0.72	0.72	0.79	NA	probable leucine-rich repeat receptor-like serine/threonine-protein kinase At3g14840-like	Protein kinase, ATP binding site;Protein kinase-like domain;Serine/threonine-protein kinase, active site;Serine/threonine- / dual specificity protein kinase, catalytic domain;Serine-threonine/tyrosine-protein kinase catalytic domain;Protein kinase, catalytic domain;Concanavalin A-like lectin/glucanase, subgroup	AT1G16670.1		Protein kinase superfamily protein	LOC_Os02g06930.1	protein kinase, putative, expressed	Zm00001d053818_T003	GRMZM2G169020_T01	Bradi3g04940.1	Sobic.004G052000.1	Seita.1G077100.1
Sevir.7G190300	2.25	1.34	1.86	9.02	8.41	7.92	0.65	0.18	0.3	2.37	1.82	1.24	NA	probable LRR receptor-like serine/threonine-protein kinase At1g63430-like	Leucine-rich repeat-containing N-terminal, type 2;Protein kinase-like domain;Leucine-rich repeat;Serine-threonine/tyrosine-protein kinase catalytic domain;Protein kinase, catalytic domain	AT1G63430.1		Leucine-rich repeat protein kinase family protein	LOC_Os04g45170.1	leucine-rich repeat family protein, putative, expressed	Zm00001d002835_T001; Zm00001d002835_T002	GRMZM2G304745_T01	NA	Sobic.006G160000.1	Seita.7G180600.1
Sevir.9G440900	6.4	5.63	3.73	3.81	4.37	5.82	2.08	1.99	1.03	0.89	0.69	0.41	NA	probably inactive leucine-rich repeat receptor-like protein kinase IMK2-like	Leucine-rich repeat-containing N-terminal, type 2;Protein kinase-like domain;Leucine-rich repeat, typical subtype;Leucine-rich repeat;Serine-threonine/tyrosine-protein kinase catalytic domain;Protein kinase, catalytic domain	AT3G51740.1	IMK2	inflorescence meristem receptor-like kinase 2	LOC_Os03g18630.1	receptor-like kinase RHG1, putative, expressed	Zm00001d028796_T001	GRMZM2G066274_T01	Bradi1g65110.1	Sobic.001G403200.1	Seita.9G437100.1; Seita.8G018200.1
Sevir.3G390700	5.4	7.29	6.01	3.85	3.21	3.34	2.98	2.8	2.56	4.24	2.53	2.32	NA	NA	NA	AT2G25470.1	AtRLP21,RLP21	receptor like protein 21	LOC_Os04g55420.1	leucine-rich repeat family protein, putative, expressed	NA	NA	NA	NA	Seita.3G373700.1
Sevir.8G242700	4.08	4.29	4.4	5.98	5.5	4.78	0.17	0.54	0.47	0.6	0.42	0.19	NA	LRR receptor-like serine/threonine-protein kinase GSO2-like	Protein kinase-like domain;Serine/threonine-protein kinase, active site;Serine/threonine- / dual specificity protein kinase, catalytic domain;Serine-threonine/tyrosine-protein kinase catalytic domain;Protein kinase, catalytic domain;PAS domain	AT5G49470.3; AT5G49470.3; AT5G49470.3	; ;	PAS domain-containing protein tyrosine kinase family protein; PAS domain-containing protein tyrosine kinase family protein; PAS domain-containing protein tyrosine kinase family protein	LOC_Os12g37570.1; LOC_Os11g45280.2; LOC_Os11g45280.1	protein kinase family protein, putative, expressed; protein kinase family protein, putative, expressed; protein kinase family protein, putative, expressed	Zm00001d048667_T006; Zm00001d048667_T005	GRMZM2G448213_T01; AC209944.5_FGT013	Bradi3g45660.1; Bradi4g09990.2	Sobic.005G213200.1; Sobic.008G130100.1	Seita.8G232500.1; Seita.3G334800.1
Sevir.9G124000	4.35	3.88	4.57	5.73	5.48	4.03	0.76	0.76	0.38	1.46	0.59	0.51	NA	probable LRR receptor-like serine/threonine-protein kinase At5g10290-like	Protein kinase, ATP binding site;Leucine-rich repeat-containing N-terminal, type 2;Protein kinase-like domain;Serine/threonine-protein kinase, active site;Serine/threonine- / dual specificity protein kinase, catalytic domain;Protein kinase, catalytic domain;Concanavalin A-like lectin/glucanase, subgroup	AT5G10290.1		leucine-rich repeat transmembrane protein kinase family protein	LOC_Os03g49620.5	BRASSINOSTEROID INSENSITIVE 1-associated receptor kinase 1 precursor, putative, expressed	Zm00001d033652_T002; Zm00001d033652_T001	AC217401.3_FGT003	Bradi1g10950.2	Sobic.001G123000.3	Seita.9G125200.1; Seita.1G128400.1
Sevir.8G167700	1.61	1.97	2.96	8.48	6.26	4.89	0.28	0.41	0.59	1.55	0.7	0.44	NA	putative receptor-like protein kinase At3g47110-like	Protein kinase, ATP binding site;Leucine-rich repeat-containing N-terminal, type 2;Protein kinase-like domain;Serine/threonine-protein kinase, active site;Leucine-rich repeat, typical subtype;Serine/threonine- / dual specificity protein kinase, catalytic domain;Leucine-rich repeat;Serine-threonine/tyrosine-protein kinase catalytic domain;Protein kinase, catalytic domain;Concanavalin A-like lectin…	AT3G47570.1		Leucine-rich repeat protein kinase family protein	LOC_Os11g36150.1	receptor-like protein kinase 2 precursor, putative, expressed	NA	NA	Bradi4g16068.1; Bradi4g16130.2	NA	Seita.8G157400.1; Seita.8G157000.1
Sevir.3G214400	4.48	3.09	3.79	6.04	4.34	3.46	0.78	0.09	0.62	1.02	0.54	0.21	NA	probable LRR receptor-like serine/threonine-protein kinase MRH1-like	Leucine-rich repeat-containing N-terminal, type 2;Protein kinase-like domain;Leucine-rich repeat;Serine-threonine/tyrosine-protein kinase catalytic domain;Protein kinase, catalytic domain;Concanavalin A-like lectin/glucanase, subgroup	AT4G18640.1	MRH1	Leucine-rich repeat protein kinase family protein	LOC_Os05g39410.2	expressed protein	Zm00001d038432_T006; Zm00001d038432_T002	GRMZM2G095588_T01; GRMZM2G102542_T01	Bradi2g22610.1	Sobic.009G169400.1	Seita.3G209100.1
Sevir.9G443000	4.7	5.07	5.42	3.23	3.48	3	0.52	0.33	1.07	0.76	0.55	1.1	NA	probable LRR receptor-like serine/threonine-protein kinase MRH1-like	Protein kinase-like domain;Serine-threonine/tyrosine-protein kinase catalytic domain;Protein kinase, catalytic domain;Concanavalin A-like lectin/glucanase, subgroup	AT4G18640.1	MRH1	Leucine-rich repeat protein kinase family protein	LOC_Os03g18370.1	MRH1, putative, expressed	Zm00001d028770_T001; Zm00001d028770_T002	GRMZM2G135359_T02	Bradi1g65340.1; Bradi1g16670.1	Sobic.001G405000.1; Sobic.009G102800.1	Seita.9G439200.1; Seita.3G279400.1
Sevir.9G291100	3.24	3.67	4.05	4.18	5.75	3.31	0.31	0.49	0.37	0.72	0.24	0.39	NA		Protein kinase, ATP binding site;Protein kinase-like domain;Serine/threonine-protein kinase, active site;Leucine-rich repeat, typical subtype;Serine/threonine- / dual specificity protein kinase, catalytic domain;Leucine-rich repeat;Protein kinase, catalytic domain;Concanavalin A-like lectin/glucanase, subgroup	AT1G17750.1	AtPEPR2,PEPR2	PEP1 receptor 2	LOC_Os10g06740.1	receptor-like protein kinase precursor, putative, expressed	NA	NA	Bradi3g20867.1	Sobic.007G212000.1; Sobic.001G265700.1	Seita.9G286900.1
Sevir.9G226700	5.2	4.49	3.78	2.99	4.16	3.22	0.9	0.41	0.54	0.85	0.1	0.46	NA	probable leucine-rich repeat receptor-like protein kinase At1g35710-like	Protein kinase, ATP binding site;Leucine-rich repeat-containing N-terminal, type 2;Protein kinase-like domain;Leucine-rich repeat, typical subtype;Leucine-rich repeat;Protein kinase, catalytic domain;Concanavalin A-like lectin/glucanase, subgroup	AT1G35710.1		Protein kinase family protein with leucine-rich repeat domain	LOC_Os10g33040.1	receptor-like protein kinase precursor, putative, expressed	Zm00001d032745_T001; Zm00001d014063_T001	GRMZM2G112309_T01; GRMZM2G001812_T01	Bradi3g28380.1; Bradi3g21274.1	Sobic.001G224000.1; Sobic.001G223550.1	Seita.9G227100.1; Seita.9G226900.1
Sevir.1G035700	2.75	3.5	4.18	4.52	4.98	3.08	0.31	0.39	0.74	0.46	0.45	0.31	NA	receptor-like protein kinase 5-like	Protein kinase, ATP binding site;Leucine-rich repeat-containing N-terminal, type 2;Protein kinase-like domain;Serine/threonine-protein kinase, active site;Leucine-rich repeat, typical subtype;Serine/threonine- / dual specificity protein kinase, catalytic domain;Leucine-rich repeat;Serine-threonine/tyrosine-protein kinase catalytic domain;Protein kinase, catalytic domain	AT5G25930.1		Protein kinase family protein with leucine-rich repeat domain	LOC_Os02g12910.1	receptor-like protein kinase 5 precursor, putative, expressed	NA	NA	Bradi3g08338.1	NA	Seita.1G015900.1
Sevir.2G084000	2.66	2.02	2.4	6.34	5.48	3.58	1.06	0.23	1.14	1.82	1.1	1.16	NA	putative receptor-like protein kinase At3g47110-like	Protein kinase, ATP binding site;Protein kinase-like domain;Serine/threonine-protein kinase, active site;Leucine-rich repeat, typical subtype;Serine/threonine- / dual specificity protein kinase, catalytic domain;Leucine-rich repeat;Protein kinase, catalytic domain;Concanavalin A-like lectin/glucanase, subgroup	AT3G47110.1		Leucine-rich repeat protein kinase family protein	LOC_Os02g12400.1	receptor-like protein kinase precursor, putative, expressed	NA	NA	NA	NA	Seita.6G035200.1; Seita.6G034700.1
Sevir.1G081100	1.3	1.52	2.21	7.56	5.14	4.11	0.67	0.46	0.68	1.35	0.87	0.57	NA	receptor-like protein 2-like	Leucine-rich repeat-containing N-terminal, type 2;Leucine-rich repeat, typical subtype;Leucine-rich repeat	AT1G17240.1	AtRLP2,RLP2	receptor like protein 2	LOC_Os02g06180.1	phytosulfokine receptor precursor, putative, expressed	NA	NA	Bradi3g04217.2; Bradi3g04240.1	Sobic.004G045700.2; Sobic.004G044500.1	Seita.1G082800.1; Seita.1G082600.1
Sevir.4G151300	6.01	3.98	2.91	2.45	3.74	2.73	2.05	0.93	0.29	0.5	0.7	0.75	NA	receptor-like protein kinase 5-like	Leucine-rich repeat-containing N-terminal, type 2;Protein kinase-like domain;Serine/threonine-protein kinase, active site;Leucine-rich repeat, typical subtype;Serine/threonine- / dual specificity protein kinase, catalytic domain;Leucine-rich repeat;Protein kinase, catalytic domain	AT5G25930.1		Protein kinase family protein with leucine-rich repeat domain	LOC_Os06g36270.2	receptor-like protein kinase 5 precursor, putative, expressed	Zm00001d046236_T003; Zm00001d046236_T004	GRMZM2G350918_T01; GRMZM2G449817_T01	Bradi1g37960.1; Bradi3g08660.1	Sobic.010G167500.1; Sobic.004G099700.1	Seita.4G183100.1; Seita.4G182400.1
Sevir.6G176700	2.54	2.51	2.66	5.8	4.19	3.89	0.5	0.03	0.63	0.55	0.33	0.11	NA	probable leucine-rich repeat receptor-like protein kinase At1g35710-like		AT4G08850.1		Leucine-rich repeat receptor-like protein kinase family protein	LOC_Os01g33110.1	receptor-like protein kinase 5 precursor, putative, expressed	NA	NA	NA	NA	Seita.6G170700.1
Sevir.2G086400	4.39	3.95	4.09	3.36	2.7	2.63	1.1	0.81	0.59	0.49	0.08	0.24	NA	probable LRR receptor-like serine/threonine-protein kinase At4g08850-like	Protein kinase, ATP binding site;Protein kinase-like domain;Tyrosine-protein kinase, active site;Leucine-rich repeat, typical subtype;Leucine-rich repeat;Serine-threonine/tyrosine-protein kinase catalytic domain;Protein kinase, catalytic domain;Concanavalin A-like lectin/glucanase, subgroup	AT4G08850.1		Leucine-rich repeat receptor-like protein kinase family protein	LOC_Os02g34790.1	receptor-like protein kinase 5 precursor, putative, expressed	Zm00001d000189_T001	GRMZM2G700905_T01	NA	Sobic.002G077400.1	Seita.2G083100.1
Sevir.1G237800	2.97	2.67	3.21	5.46	2.75	3.29	0.83	0.42	0.42	0.54	0.47	0.58	NA		Leucine-rich repeat-containing N-terminal, type 2;Protein kinase-like domain;Serine/threonine-protein kinase, active site;Protein kinase, catalytic domain	AT3G11080.1	AtRLP35,RLP35	receptor like protein 35	LOC_Os02g40200.1	receptor-like protein kinase precursor, putative, expressed	Zm00001d035657_T001; Zm00001d047806_T001	GRMZM2G069162_T04; GRMZM2G103270_T01	Bradi2g37100.1; Bradi1g66640.2	Sobic.009G013900.1; Sobic.001G420900.1	Seita.1G233100.1; Seita.3G317400.1
Sevir.7G134400	1.63	2.64	3.78	3	3.52	4.99	0.43	0.19	0.19	0.42	0.35	1	NA	probable inactive receptor kinase RLK902-like	Protein kinase, ATP binding site;Leucine-rich repeat-containing N-terminal, type 2;Protein kinase-like domain;Protein kinase, catalytic domain	AT1G48480.1	RKL1	receptor-like kinase 1	LOC_Os04g38910.1	atypical receptor-like kinase MARK, putative, expressed	Zm00001d003399_T001; Zm00001d025621_T001	GRMZM2G394321_T01; GRMZM5G895834_T01	Bradi5g12540.1; Bradi1g69550.1	Sobic.006G108700.1; Sobic.002G195800.3	Seita.7G126400.1; Seita.9G486000.1
Sevir.2G368100	3.94	4.05	2.9	3.38	2.75	2.25	0.61	0.58	0.35	0.77	0.33	0.32	NA	nodulation receptor kinase-like	Protein kinase, ATP binding site;Protein kinase-like domain;Serine/threonine-protein kinase, active site;Serine/threonine- / dual specificity protein kinase, catalytic domain;Serine-threonine/tyrosine-protein kinase catalytic domain;Protein kinase, catalytic domain;Concanavalin A-like lectin/glucanase, subgroup	AT1G51860.1		Leucine-rich repeat protein kinase family protein	LOC_Os07g38070.1	protein kinase, putative, expressed	Zm00001d021829_T001; Zm00001d021829_T002	GRMZM2G700291_T03; AC233871.1_FGT005	Bradi1g24287.2	Sobic.002G343100.1	Seita.2G357100.1
Sevir.2G100500	0.37	0.64	2.94	6.62	5.8	2.65	0.26	0.17	0.37	2.4	0.82	0.63	NA	probable LRR receptor-like serine/threonine-protein kinase At1g56130-like	Malectin;Protein kinase-like domain;Serine/threonine-protein kinase, active site;Serine/threonine- / dual specificity protein kinase, catalytic domain;Serine-threonine/tyrosine-protein kinase catalytic domain;Protein kinase, catalytic domain;Concanavalin A-like lectin/glucanase, subgroup	AT1G56130.1		Leucine-rich repeat transmembrane protein kinase	LOC_Os08g10310.1	SHR5-receptor-like kinase, putative, expressed	Zm00001d024291_T001; Zm00001d024291_T004	GRMZM2G151567_T01; GRMZM2G073250_T02	Bradi3g17756.3	Sobic.007G073400.1; Sobic.003G188100.2	Seita.2G097500.1; Seita.2G097400.1
Sevir.1G123000	3.47	1.58	2.1	4.17	2.7	4.79	1.12	0.1	0.39	1.39	0.87	1.18	NA		Protein kinase, ATP binding site;Leucine-rich repeat-containing N-terminal, type 2;Protein kinase-like domain;Serine/threonine-protein kinase, active site;Leucine-rich repeat, typical subtype;Serine/threonine- / dual specificity protein kinase, catalytic domain;Leucine-rich repeat;Protein kinase, catalytic domain;Concanavalin A-like lectin/glucanase, subgroup	AT4G08850.1		Leucine-rich repeat receptor-like protein kinase family protein	LOC_Os02g34790.1	receptor-like protein kinase 5 precursor, putative, expressed	NA	NA	NA	Sobic.003G413201.1	Seita.1G124300.1
Sevir.2G006800	1.99	2.69	3.76	2.79	4.34	2.71	0.41	0.18	0.31	0.41	0.42	0.41	RPK2	LRR receptor-like serine/threonine-protein kinase RPK2-like	Protein kinase-like domain;Serine/threonine-protein kinase, active site;Serine/threonine- / dual specificity protein kinase, catalytic domain;Protein kinase, catalytic domain;Concanavalin A-like lectin/glucanase, subgroup	AT3G02130.1	RPK2,TOAD2	receptor-like protein kinase 2	LOC_Os03g54900.2	phytosulfokine receptor precursor, putative, expressed	Zm00001d018665_T001	GRMZM5G852776_T01	Bradi1g59290.3	Sobic.002G009900.1	Seita.2G002700.1
Sevir.2G083200	0.85	1.13	1.88	6.96	4.43	3	0.49	0.41	0.61	1.59	0.76	0.26	NA	probable LRR receptor-like serine/threonine-protein kinase At3g47570-like	Protein kinase, ATP binding site;Leucine-rich repeat-containing N-terminal, type 2;Protein kinase-like domain;Serine/threonine-protein kinase, active site;Leucine-rich repeat, typical subtype;Serine/threonine- / dual specificity protein kinase, catalytic domain;Leucine-rich repeat;Protein kinase, catalytic domain;Concanavalin A-like lectin/glucanase, subgroup	AT3G47570.1		Leucine-rich repeat protein kinase family protein	LOC_Os01g05960.1	receptor kinase, putative, expressed	NA	NA	Bradi1g29792.1	Sobic.002G075400.2; Sobic.002G074700.2	Seita.2G080600.1; Seita.2G080500.1
Sevir.5G270900	3.21	2.37	2.92	3.41	3.52	2.79	0.73	0.31	0.34	0.35	0.47	0.39	NA	probable LRR receptor-like serine/threonine-protein kinase At5g45840-like	Leucine-rich repeat-containing N-terminal, type 2;Protein kinase-like domain;Serine-threonine/tyrosine-protein kinase catalytic domain;Protein kinase, catalytic domain	AT5G45840.1		Leucine-rich repeat protein kinase family protein	LOC_Os01g48390.1	expressed protein	Zm00001d043890_T006; Zm00001d043890_T005	GRMZM2G078926_T01; GRMZM2G059497_T01	Bradi2g46370.4	Sobic.003G254100.1	Seita.5G267900.1
Sevir.7G248600	1.95	1.53	1.87	3.62	4.17	4.53	0.36	0.28	0.12	1.06	0.36	0.77	NA		Malectin;Protein kinase, ATP binding site;Protein kinase-like domain;Serine-threonine/tyrosine-protein kinase catalytic domain;Protein kinase, catalytic domain;Concanavalin A-like lectin/glucanase, subgroup;Serine/threonine-protein kinase, active site;Serine/threonine- / dual specificity protein kinase, catalytic domain	AT1G56130.1		Leucine-rich repeat transmembrane protein kinase	LOC_Os04g52600.1	SHR5-receptor-like kinase, putative, expressed	Zm00001d002313_T003; Zm00001d002313_T007	GRMZM2G337532_T01; GRMZM2G031536_T01	Bradi5g21857.5	Sobic.006G215400.1; Sobic.006G215600.2	Seita.7G237300.1; Seita.7G237800.1
Sevir.2G083100	1.94	2.04	2.69	4.6	3.19	2.71	0.13	0.5	0.39	0.62	0.11	0.35	NA	probable LRR receptor-like serine/threonine-protein kinase At3g47570-like	Protein kinase, ATP binding site;Leucine-rich repeat-containing N-terminal, type 2;Protein kinase-like domain;Serine/threonine-protein kinase, active site;Leucine-rich repeat, typical subtype;Serine/threonine- / dual specificity protein kinase, catalytic domain;Leucine-rich repeat;Protein kinase, catalytic domain;Concanavalin A-like lectin/glucanase, subgroup	AT3G47570.1		Leucine-rich repeat protein kinase family protein	LOC_Os01g05960.1	receptor kinase, putative, expressed	NA	NA	Bradi1g29792.1	Sobic.002G075400.2; Sobic.002G075100.1	Seita.2G080500.1; Seita.2G080600.1
Sevir.1G050000	0.58	2.3	3.66	2.22	4.22	2.59	0.19	0.31	0.21	0.62	0.86	0.57	NA		Protein kinase, ATP binding site;Protein kinase-like domain;Leucine-rich repeat;Protein kinase, catalytic domain;Concanavalin A-like lectin/glucanase, subgroup	AT4G22130.1	SRF8	STRUBBELIG-receptor family 8	LOC_Os02g10110.1	Leucine Rich Repeat family protein, expressed	Zm00001d053676_T003; Zm00001d053676_T002	GRMZM2G454306_T02; GRMZM5G823563_T01	Bradi3g06990.1; Bradi1g44096.1	Sobic.004G078500.1	Seita.1G050800.1
Sevir.1G026000	2.55	2.82	2.21	3.78	2.78	1.4	0.28	0.7	0.64	1.08	0.17	0.14	NA	probable LRR receptor-like serine/threonine-protein kinase At1g53440-like	Malectin;Protein kinase-like domain;Serine/threonine-protein kinase, active site;Serine/threonine- / dual specificity protein kinase, catalytic domain;Leucine-rich repeat;Serine-threonine/tyrosine-protein kinase catalytic domain;Protein kinase, catalytic domain	AT1G53440.1		Leucine-rich repeat transmembrane protein kinase	LOC_Os02g13850.1	leucine-rich repeat-containing protein kinase family protein, putative, expressed	Zm00001d016242_T002; Zm00001d016242_T001	GRMZM2G424519_T01; GRMZM2G148567_T01	Bradi3g08917.7	Sobic.004G102100.1	Seita.1G025600.1; Seita.1G025400.1
Sevir.1G257600	2.7	1.81	2.32	2.35	3.24	2.99	0.63	0.22	0.21	0.5	0.4	0.26	NA	leucine-rich repeat receptor-like kinase protein FLORAL ORGAN NUMBER1-like	Leucine-rich repeat	AT5G66330.1		Leucine-rich repeat (LRR) family protein	LOC_Os02g43250.1	receptor-like protein kinase precursor, putative, expressed	Zm00001d051313_T001	GRMZM2G065021_T01; GRMZM2G463359_T01	Bradi3g50190.1	Sobic.004G300701.1	Seita.1G253400.1
Sevir.1G083600	1.86	2.11	2.8	2.99	3.41	2.1	0.41	0.48	0.86	0.39	0.32	0.37	NA	tyrosine-sulfated glycopeptide receptor 1-like	Protein kinase, ATP binding site;Leucine-rich repeat-containing N-terminal, type 2;Protein kinase-like domain;Serine/threonine-protein kinase, active site;Leucine-rich repeat, typical subtype;Serine/threonine- / dual specificity protein kinase, catalytic domain;Leucine-rich repeat;Protein kinase, catalytic domain;Concanavalin A-like lectin/glucanase, subgroup	AT1G72300.1		Leucine-rich receptor-like protein kinase family protein	LOC_Os02g05920.1	phytosulfokine receptor precursor, putative, expressed	NA	NA	Bradi3g04227.1	Sobic.004G044700.1; Sobic.004G044800.1	Seita.1G085800.1; Seita.1G085700.1
Sevir.1G085300	2.56	2.27	2.26	3.3	2.59	1.92	0.09	0.1	0.45	0.55	0.24	0.36	NA			AT4G29990.1		Leucine-rich repeat transmembrane protein kinase protein	LOC_Os02g05730.1	protein kinase domain containing protein, expressed	Zm00001d015291_T002; Zm00001d015291_T003	GRMZM2G093490_T01	Bradi3g04061.1	Sobic.004G042600.1	Seita.1G087100.1; Seita.1G087000.1
Sevir.2G189100	2.16	1.93	1.57	4.23	2.8	2.1	0.29	0.49	0.36	1.31	0.47	0.38	NA		Malectin;Protein kinase, ATP binding site;Protein kinase-like domain;Serine/threonine-protein kinase, active site;Serine/threonine- / dual specificity protein kinase, catalytic domain;Leucine-rich repeat;Serine-threonine/tyrosine-protein kinase catalytic domain;Protein kinase, catalytic domain;Concanavalin A-like lectin/glucanase, subgroup	AT1G07650.1; AT1G07650.2	;	Leucine-rich repeat transmembrane protein kinase; Leucine-rich repeat transmembrane protein kinase	LOC_Os09g17630.1; LOC_Os09g17630.1	receptor-like protein kinase 2, putative, expressed; receptor-like protein kinase 2, putative, expressed	Zm00001d020172_T001; Zm00001d020171_T002	GRMZM2G011526_T01	Bradi4g28367.1	Sobic.002G176500.1; Sobic.002G176700.1	Seita.2G182000.1; Seita.2G182200.1
Sevir.2G435700	1.96	2.09	2.36	2.84	3.23	2.27	0.43	0.54	0.52	0.23	0.49	0.18	NA	probable LRR receptor-like serine/threonine-protein kinase At3g47570-like	Protein kinase, ATP binding site;Leucine-rich repeat-containing N-terminal, type 2;Protein kinase-like domain;Serine/threonine-protein kinase, active site;Leucine-rich repeat, typical subtype;Serine/threonine- / dual specificity protein kinase, catalytic domain;Leucine-rich repeat;Protein kinase, catalytic domain;Concanavalin A-like lectin/glucanase, subgroup	AT3G47570.1		Leucine-rich repeat protein kinase family protein	LOC_Os10g22890.1	receptor-like kinase, putative, expressed	NA	NA	NA	Sobic.005G019300.1	Seita.2G423600.1
Sevir.4G195100	0.9	1.66	1.95	3.3	3.65	2.3	0.21	0.47	0.67	0.69	0.97	0.36	NA	protein NSP-INTERACTING KINASE 1-like	Leucine-rich repeat-containing N-terminal, type 2;Leucine-rich repeat	AT5G16000.1	NIK1	NSP-interacting kinase 1	LOC_Os02g49600.1	BRASSINOSTEROID INSENSITIVE 1-associated receptor kinase 1 precursor, putative, expressed	NA	NA	NA	NA	Seita.4G122500.1
Sevir.6G033000	1.88	2.07	2.62	3.28	2.26	1.62	0.26	0.44	0.47	0.46	0.24	0.23	NA	putative receptor-like protein kinase At3g47110-like	Protein kinase, ATP binding site;Protein kinase-like domain;Serine/threonine-protein kinase, active site;Leucine-rich repeat, typical subtype;Serine/threonine- / dual specificity protein kinase, catalytic domain;Leucine-rich repeat;Protein kinase, catalytic domain;Concanavalin A-like lectin/glucanase, subgroup	AT3G47570.1		Leucine-rich repeat protein kinase family protein	LOC_Os12g31470.1	retrotransposon protein, putative, unclassified, expressed	NA	NA	Bradi3g08075.2	NA	Seita.6G034700.1; Seita.6G035200.1
Sevir.8G184700	1.21	1.62	2.39	3.61	2.94	1.81	0.61	0.44	0.67	0.8	0.99	0.44	NA	probable LRR receptor-like serine/threonine-protein kinase At3g47570-like	Protein kinase, ATP binding site;Protein kinase-like domain;Serine/threonine-protein kinase, active site;Leucine-rich repeat, typical subtype;Serine/threonine- / dual specificity protein kinase, catalytic domain;Leucine-rich repeat;Protein kinase, catalytic domain;Concanavalin A-like lectin/glucanase, subgroup	AT3G47570.1		Leucine-rich repeat protein kinase family protein	LOC_Os01g12790.1	receptor protein kinase, putative, expressed	Zm00001d030796_T003; Zm00001d030796_T011	GRMZM2G429759_T05; GRMZM2G406974_T01	Bradi4g10998.1; Bradi4g10987.1	Sobic.010G054400.1; Sobic.008G065200.3	Seita.8G175500.1; Seita.8G049600.1
Sevir.1G083400	1.65	1.83	2.18	2.19	2.56	2.5	0.13	0.42	0.28	0.48	0.19	0.31	NA		Leucine-rich repeat-containing N-terminal, type 2;Protein kinase-like domain;Leucine-rich repeat, typical subtype;Serine/threonine- / dual specificity protein kinase, catalytic domain;Leucine-rich repeat;Serine-threonine/tyrosine-protein kinase catalytic domain;Protein kinase, catalytic domain;Concanavalin A-like lectin/glucanase, subgroup	AT1G72300.1		Leucine-rich receptor-like protein kinase family protein	LOC_Os02g05930.1	phytosulfokine receptor precursor, putative, expressed	Zm00001d015298_T001	GRMZM2G104425_T01	Bradi3g04187.1; Bradi3g04210.2	Sobic.004G044500.1; Sobic.004G044700.1	Seita.1G085600.1; Seita.1G085300.1
Sevir.5G116900	1.08	0.85	0.9	1.63	3.62	4.46	0.15	0.16	0.2	0.4	0.82	0.55	NA	probable LRR receptor-like serine/threonine-protein kinase At4g26540-like	Protein kinase, ATP binding site;Leucine-rich repeat-containing N-terminal, type 2;Protein kinase-like domain;Serine/threonine-protein kinase, active site;Leucine-rich repeat, typical subtype;Serine/threonine- / dual specificity protein kinase, catalytic domain;Leucine-rich repeat;Protein kinase, catalytic domain	AT5G56040.2		Leucine-rich receptor-like protein kinase family protein	LOC_Os01g07560.1	receptor-like protein kinase 2 precursor, putative, expressed	Zm00001d008715_T001; Zm00001d037672_T001	GRMZM2G463493_T01; GRMZM2G131609_T01	Bradi2g04330.1; Bradi2g34380.1	Sobic.003G052100.2; Sobic.009G060700.1	Seita.5G120300.1; Seita.3G100800.1
Sevir.2G096700	1.37	1.63	1.98	2.62	2.57	1.39	0.24	0.34	0.29	0.26	0.2	0.31	NA	putative receptor-like protein kinase At3g47110-like	Protein kinase, ATP binding site;Leucine-rich repeat-containing N-terminal, type 2;Protein kinase-like domain;Serine/threonine-protein kinase, active site;Leucine-rich repeat, typical subtype;Serine/threonine- / dual specificity protein kinase, catalytic domain;Leucine-rich repeat;Protein kinase, catalytic domain;Concanavalin A-like lectin/glucanase, subgroup	AT3G47570.1		Leucine-rich repeat protein kinase family protein	LOC_Os01g05960.1	receptor kinase, putative, expressed	Zm00001d039822_T001	GRMZM2G463574_T01	Bradi2g00540.1; Bradi2g00501.2	Sobic.002G086900.1; Sobic.003G067600.1	Seita.2G093900.1
Sevir.5G450900	2.23	1.66	1.58	1.58	1.58	2.55	1.1	0.87	0.96	0.7	0.5	0.36	NA	probable leucine-rich repeat receptor-like protein kinase At5g49770-like	Protein kinase, ATP binding site;Protein kinase-like domain;Serine/threonine-protein kinase, active site;Serine-threonine/tyrosine-protein kinase catalytic domain;Protein kinase, catalytic domain;Concanavalin A-like lectin/glucanase, subgroup	AT3G26700.1		Protein kinase superfamily protein	LOC_Os01g70970.1	protein kinase, putative, expressed	Zm00001d011912_T002; Zm00001d011912_T004	AC233953.1_FGT004	NA	Sobic.003G418300.1; Sobic.004G349300.1	Seita.5G444400.1; Seita.5G383900.1
Sevir.5G025900	1.35	1.93	2.12	2.69	2.12	0.89	0.44	0.1	0.22	0.45	0.38	0.17	NA	LRR receptor-like serine/threonine-protein kinase HSL2-like	Protein kinase-like domain;Serine/threonine-protein kinase, active site;Serine/threonine- / dual specificity protein kinase, catalytic domain;Protein kinase, catalytic domain	AT5G25930.1		Protein kinase family protein with leucine-rich repeat domain	LOC_Os02g13510.1	receptor-like protein kinase 5 precursor, putative, expressed	Zm00001d016285_T001; Zm00001d036972_T001	GRMZM2G176206_T01; GRMZM2G449817_T01	Bradi3g08660.1; Bradi2g49447.2	Sobic.004G099700.1; Sobic.010G167500.1	Seita.5G027200.1; Seita.1G028700.1
Sevir.6G126700	0.96	1.19	1.7	3.34	2.64	1.23	0.14	0.14	0.31	0.77	0.35	0.19	NA	receptor-like protein kinase BRI1-like 3-like	Protein kinase, ATP binding site;Leucine-rich repeat-containing N-terminal, type 2;Protein kinase-like domain;Serine/threonine-protein kinase, active site;Serine/threonine- / dual specificity protein kinase, catalytic domain;Leucine-rich repeat;Serine-threonine/tyrosine-protein kinase catalytic domain;Protein kinase, catalytic domain;Concanavalin A-like lectin/glucanase, subgroup	AT3G13380.1	BRL3	BRI1-like 3	LOC_Os08g25380.1	serine/threonine-protein kinase BRI1-like 1 precursor, putative, expressed	Zm00001d050132_T001	GRMZM2G438007_T01	Bradi4g27440.1	NA	Seita.6G117300.1
Sevir.5G238900	3.81	1.88	1.19	0.89	0.3	2.95	0.47	0.6	0.4	0.66	0.05	0.88	NA	protein TOO MANY MOUTHS-like	Leucine-rich repeat, typical subtype;Leucine-rich repeat	AT1G80080.1	AtRLP17,TMM	Leucine-rich repeat (LRR) family protein	LOC_Os01g43440.1	TOO MANY MOUTHS precursor, putative, expressed	Zm00001d044182_T001	GRMZM2G011401_T01; GRMZM2G495410_T01	Bradi2g43940.1	Sobic.003G225500.1; Sobic.005G199700.1	Seita.5G231700.1
Sevir.3G021000	1.18	1.49	1.82	2.64	2.43	1.41	0.45	0.17	0.26	0.16	0.41	0.14	NA	NA	NA	AT2G02220.1	ATPSKR1,PSKR1	phytosulfokin receptor 1	LOC_Os04g57630.1	phytosulfokine receptor precursor, putative, expressed	NA	NA	NA	Sobic.006G262400.1; Sobic.006G262700.1	Seita.3G019600.1
Sevir.7G292400	1.23	1.22	1.3	2.77	2.55	1.54	0.29	0.13	0.29	0.26	0.29	0.21	NA		Protein kinase, ATP binding site;Protein kinase-like domain;Serine/threonine-protein kinase, active site;Leucine-rich repeat, typical subtype;Serine/threonine- / dual specificity protein kinase, catalytic domain;Leucine-rich repeat;Serine-threonine/tyrosine-protein kinase catalytic domain;Protein kinase, catalytic domain	AT5G25930.1; AT5G25930.1	;	Protein kinase family protein with leucine-rich repeat domain; Protein kinase family protein with leucine-rich repeat domain	LOC_Os12g08180.1; LOC_Os01g53920.1	receptor-like protein kinase 2 precursor, putative, expressed; receptor-like protein kinase 5 precursor, putative, expressed	Zm00001d023608_T001; Zm00001d043512_T001	GRMZM2G059214_T01; GRMZM2G002542_T01	NA	Sobic.008G060500.2; Sobic.008G060200.1	Seita.7G281500.1; Seita.7G281600.1
Sevir.2G057200	0.9	0.99	1.48	2.75	2.57	1.61	0.26	0.29	0.34	0.78	0.34	0.39	NA	LRR receptor-like serine/threonine-protein kinase GSO2-like	Leucine-rich repeat-containing N-terminal, type 2;Leucine-rich repeat, typical subtype;Leucine-rich repeat	AT3G11010.1; AT3G05650.1; AT3G11080.1	AtRLP34,RLP34; AtRLP32,RLP32; AtRLP35,RLP35	receptor like protein 34; receptor like protein 32; receptor like protein 35	LOC_Os01g06900.1; LOC_Os01g06870.1; LOC_Os01g06900.1	verticillium wilt disease resistance protein Ve2, putative, expressed; resistance protein SlVe1 precursor, putative, expressed; verticillium wilt disease resistance protein Ve2, putative, expressed	NA	NA	NA	NA	Seita.2G052700.1; Seita.2G052800.1
Sevir.9G226500	1.73	2.17	1.96	1.7	1.43	1.21	0.32	0.26	0.26	0.32	0.2	0.1	NA	probable leucine-rich repeat receptor-like protein kinase At1g35710-like	Protein kinase, ATP binding site;Leucine-rich repeat-containing N-terminal, type 2;Protein kinase-like domain;Leucine-rich repeat, typical subtype;Leucine-rich repeat;Protein kinase, catalytic domain;Concanavalin A-like lectin/glucanase, subgroup	AT4G20140.1	GSO1	Leucine-rich repeat transmembrane protein kinase	LOC_Os10g33130.1	leucine-rich repeat receptor protein kinase EXS precursor, putative, expressed	Zm00001d032745_T001; Zm00001d014063_T001	GRMZM2G001812_T01; GRMZM2G112309_T01	Bradi3g28380.1	Sobic.001G224000.1; Sobic.001G223550.1	Seita.9G226900.1; Seita.9G227100.1
Sevir.8G004900	4.69	3.35	1.7	0.26	0.12	0	0.35	0.9	0.77	0.22	0.1	0	NA	LRR receptor-like serine/threonine-protein kinase RCH1-like	Protein kinase, ATP binding site;Protein kinase-like domain;Serine/threonine-protein kinase, active site;Leucine-rich repeat, typical subtype;Serine/threonine- / dual specificity protein kinase, catalytic domain;Leucine-rich repeat;Protein kinase, catalytic domain	AT3G24240.1		Leucine-rich repeat receptor-like protein kinase family protein	LOC_Os04g04330.1	receptor-like protein kinase 2 precursor, putative, expressed	Zm00001d025002_T002; Zm00001d025002_T001	GRMZM2G034155_T01; GRMZM2G131609_T01	Bradi5g01210.1	Sobic.006G013300.1; Sobic.009G060700.1	Seita.7G017000.1; Seita.5G120300.1
Sevir.2G056900	0.94	1.42	1.53	2.35	1.91	1.38	0.05	0.06	0.35	0.44	0.39	0.41	NA		Leucine-rich repeat, typical subtype;Leucine-rich repeat	AT3G11010.1	AtRLP34,RLP34	receptor like protein 34	LOC_Os04g40440.1	expressed protein	NA	NA	NA	NA	Seita.2G052700.1; Seita.2G052800.1
Sevir.9G269500	1.17	1.21	1.26	2.39	1.94	1.31	0.31	0.26	0.24	0.72	0.24	0.23	NA		Protein kinase, ATP binding site;Leucine-rich repeat-containing N-terminal, type 2;Protein kinase-like domain;Leucine-rich repeat, typical subtype;Leucine-rich repeat;Serine-threonine/tyrosine-protein kinase catalytic domain;Protein kinase, catalytic domain;Concanavalin A-like lectin/glucanase, subgroup	AT3G47570.1		Leucine-rich repeat protein kinase family protein	LOC_Os10g22890.1	receptor-like kinase, putative, expressed	NA	NA	Bradi3g16427.1	Sobic.005G187700.1	Seita.9G268400.1; Seita.8G122500.1
Sevir.3G202400	0.91	0.52	0.96	3.29	1.65	1.35	0.63	0.55	0.25	0.53	0.3	0.85	NA	NA	NA	AT5G21090.1		Leucine-rich repeat (LRR) family protein	LOC_Os05g41230.1	BRASSINOSTEROID INSENSITIVE 1-associated receptor kinase 1 precursor, putative, expressed	NA	NA	NA	NA	Seita.3G197900.1
Sevir.5G259500	0.6	1.01	1.15	2.14	1.88	1.23	0.1	0.12	0.12	0.35	0.08	0.22	NA	probable LRR receptor-like serine/threonine-protein kinase At3g47570-like	Protein kinase, ATP binding site;Leucine-rich repeat-containing N-terminal, type 2;Protein kinase-like domain;Serine/threonine-protein kinase, active site;Leucine-rich repeat, typical subtype;Serine/threonine- / dual specificity protein kinase, catalytic domain;Leucine-rich repeat;Serine-threonine/tyrosine-protein kinase catalytic domain;Protein kinase, catalytic domain;Concanavalin A-like lectin…	AT3G47570.1		Leucine-rich repeat protein kinase family protein	LOC_Os02g12400.1	receptor-like protein kinase precursor, putative, expressed	Zm00001d023470_T001	GRMZM5G839644_T01	Bradi3g08075.2	Sobic.004G091500.1; Sobic.010G228800.1	Seita.1G037000.1; Seita.1G037300.1
Sevir.4G151000	1.5	1.3	0.92	1.42	1.86	0.9	0.59	0.2	0.11	0.45	0.19	0.21	NA	receptor-like protein kinase 5-like	Protein kinase, ATP binding site;Leucine-rich repeat-containing N-terminal, type 2;Protein kinase-like domain;Serine/threonine-protein kinase, active site;Leucine-rich repeat, typical subtype;Serine/threonine- / dual specificity protein kinase, catalytic domain;Leucine-rich repeat;Serine-threonine/tyrosine-protein kinase catalytic domain;Protein kinase, catalytic domain	AT5G25930.1		Protein kinase family protein with leucine-rich repeat domain	LOC_Os06g36270.3	receptor-like protein kinase 5 precursor, putative, expressed	Zm00001d036972_T001; Zm00001d046236_T003	GRMZM2G449817_T01; GRMZM2G350918_T01	Bradi1g37960.1; Bradi3g08660.1	Sobic.010G167500.1; Sobic.004G111200.1	Seita.4G182400.1; Seita.4G183100.1
Sevir.1G246900	0.89	0.98	0.8	1.61	1.64	1.32	0.32	0.2	0.16	0.24	0.14	0.03	NA	phytosulfokine receptor 1-like	Protein kinase, ATP binding site;Leucine-rich repeat-containing N-terminal, type 2;Protein kinase-like domain;Serine/threonine-protein kinase, active site;Leucine-rich repeat, typical subtype;Serine/threonine- / dual specificity protein kinase, catalytic domain;Leucine-rich repeat;Protein kinase, catalytic domain;Concanavalin A-like lectin/glucanase, subgroup	AT2G02220.1	ATPSKR1,PSKR1	phytosulfokin receptor 1	LOC_Os02g41890.1	phytosulfokine receptor precursor, putative, expressed	Zm00001d017291_T001	GRMZM2G080537_T01	Bradi3g49370.1	Sobic.004G222100.1	Seita.1G242000.1
Sevir.7G251400	1.09	0.97	1.07	1.28	1.58	1.23	0.58	0.25	0.15	0.38	0.63	0.43	NA		Leucine-rich repeat-containing N-terminal, type 2;Protein kinase-like domain;Leucine-rich repeat, typical subtype;Leucine-rich repeat;Protein kinase, catalytic domain;Concanavalin A-like lectin/glucanase, subgroup	AT5G46330.1	FLS2	Leucine-rich receptor-like protein kinase family protein	LOC_Os04g52780.1	leucine-rich repeat receptor protein kinase EXS precursor, putative, expressed	Zm00001d002287_T001	GRMZM2G080041_T01	NA	Sobic.006G217900.1	Seita.7G239900.1
Sevir.3G092400	0.98	0.67	0.79	0.98	1.18	2.38	0.24	0.13	0.13	0.1	0.13	0.28	NA	probable inactive leucine-rich repeat receptor-like protein kinase At1g66830-like	Leucine-rich repeat-containing N-terminal, type 2;Protein kinase-like domain;Leucine-rich repeat, typical subtype;Leucine-rich repeat;Protein kinase, catalytic domain	AT1G67510.1		Leucine-rich repeat protein kinase family protein	LOC_Os12g13300.1	expressed protein	Zm00001d024047_T001; Zm00001d004635_T002	GRMZM2G012176_T01; AC235540.1_FGT002	Bradi4g39617.1; Bradi4g20174.1	Sobic.008G083300.1; Sobic.001G037400.1	Seita.3G090400.1; Seita.8G108000.1
Sevir.5G258800	1.18	0.45	0.5	2.94	1.16	0.74	0.51	0.12	0.07	1.94	0.42	0.37	NA		Protein kinase, ATP binding site;Leucine-rich repeat-containing N-terminal, type 2;Protein kinase-like domain;Serine/threonine-protein kinase, active site;Leucine-rich repeat, typical subtype;Serine/threonine- / dual specificity protein kinase, catalytic domain;Leucine-rich repeat;Serine-threonine/tyrosine-protein kinase catalytic domain;Protein kinase, catalytic domain;Concanavalin A-like lectin…	AT3G47570.1; AT3G47090.1	;	Leucine-rich repeat protein kinase family protein; Leucine-rich repeat protein kinase family protein	LOC_Os02g12450.1; LOC_Os02g12450.1	receptor-like protein kinase 2 precursor, putative, expressed; receptor-like protein kinase 2 precursor, putative, expressed	NA	NA	Bradi3g08075.2	Sobic.004G091300.1	Seita.1G036300.1; Seita.1G036600.1
Sevir.6G028100	2.07	0.84	0.75	1.38	0.87	0.55	0.87	0.19	0.09	0.12	0.18	0.16	NA	probable LRR receptor-like serine/threonine-protein kinase At1g56130-like	Malectin;Protein kinase-like domain;Serine/threonine-protein kinase, active site;Serine/threonine- / dual specificity protein kinase, catalytic domain;Leucine-rich repeat;Serine-threonine/tyrosine-protein kinase catalytic domain;Protein kinase, catalytic domain;Concanavalin A-like lectin/glucanase, subgroup	AT1G56130.1		Leucine-rich repeat transmembrane protein kinase	LOC_Os08g10300.1	SHR5-receptor-like kinase, putative, expressed	Zm00001d024291_T001; Zm00001d024291_T004	GRMZM2G151567_T01; GRMZM2G453524_T01	NA	Sobic.007G073400.1; Sobic.006G215400.1	Seita.6G030000.1; Seita.2G097500.1
Sevir.5G103800	0.46	0.66	0.88	2.01	1.24	1.17	0.12	0.02	0.25	0.31	0.13	0.1	NA		Protein kinase, ATP binding site;Leucine-rich repeat-containing N-terminal, type 2;Protein kinase-like domain;Serine/threonine-protein kinase, active site;Leucine-rich repeat, typical subtype;Serine/threonine- / dual specificity protein kinase, catalytic domain;Leucine-rich repeat;Protein kinase, catalytic domain;Concanavalin A-like lectin/glucanase, subgroup	AT3G47570.1; AT3G47570.1	;	Leucine-rich repeat protein kinase family protein; Leucine-rich repeat protein kinase family protein	LOC_Os01g05870.1; LOC_Os01g05960.1	receptor kinase, putative, expressed; receptor kinase, putative, expressed	Zm00001d008633_T001	GRMZM2G421669_T01	Bradi1g47990.1; Bradi2g00485.1	Sobic.003G068200.3; Sobic.003G067600.1	Seita.5G107000.1; Seita.5G106800.1
Sevir.1G232000	0.88	0.83	0.93	1.63	1.08	0.92	0.29	0.15	0.25	0.52	0.25	0.19	NA	NA	NA	AT3G47570.1		Leucine-rich repeat protein kinase family protein	LOC_Os02g39670.1	retrotransposon, putative, centromere-specific, expressed	NA	NA	NA	NA	Seita.1G228200.1
Sevir.2G388700	1.2	0.67	0.61	1.24	1.38	0.99	0.43	0.06	0.19	0.31	0.24	0.07	NA	probable LRR receptor-like serine/threonine-protein kinase At1g74360-like	Protein kinase, ATP binding site;Leucine-rich repeat-containing N-terminal, type 2;Protein kinase-like domain;Serine/threonine-protein kinase, active site;Leucine-rich repeat, typical subtype;Serine/threonine- / dual specificity protein kinase, catalytic domain;Leucine-rich repeat;Protein kinase, catalytic domain;Concanavalin A-like lectin/glucanase, subgroup	AT1G74360.1		Leucine-rich repeat protein kinase family protein	LOC_Os07g40630.1	BRASSINOSTEROID INSENSITIVE 1 precursor, putative, expressed	Zm00001d022044_T001; Zm00001d052906_T001	GRMZM2G356076_T01; GRMZM2G465165_T01	Bradi1g22650.1	Sobic.002G363400.1; Sobic.001G315600.1	Seita.2G377800.1
Sevir.2G170100	1.02	0.87	0.94	0.92	1.38	0.9	0.34	0.07	0.17	0.17	0.27	0.14	NA	receptor-like protein kinase BRI1-like 3-like	Protein kinase, ATP binding site;Leucine-rich repeat-containing N-terminal, type 2;Protein kinase-like domain;Serine/threonine-protein kinase, active site;Leucine-rich repeat, typical subtype;Serine/threonine- / dual specificity protein kinase, catalytic domain;Leucine-rich repeat;Protein kinase, catalytic domain;Concanavalin A-like lectin/glucanase, subgroup	AT3G13380.1	BRL3	BRI1-like 3	LOC_Os09g12240.1	serine/threonine-protein kinase BRI1-like 1 precursor, putative, expressed	Zm00001d019983_T001	GRMZM2G092604_T01	Bradi4g27440.1; Bradi2g48279.1	Sobic.002G155400.1; Sobic.004G059200.1	Seita.2G165600.1
Sevir.7G248700	0.41	0.38	0.69	1.92	1.67	0.86	0.13	0.1	0.32	0.44	0.24	0.21	NA	probable LRR receptor-like serine/threonine-protein kinase At1g56140-like	Malectin;Protein kinase, ATP binding site;Protein kinase-like domain;Serine/threonine-protein kinase, active site;Serine/threonine- / dual specificity protein kinase, catalytic domain;Serine-threonine/tyrosine-protein kinase catalytic domain;Protein kinase, catalytic domain;Concanavalin A-like lectin/glucanase, subgroup	AT1G56130.1; AT1G56130.1; AT1G56120.1	; ;	Leucine-rich repeat transmembrane protein kinase; Leucine-rich repeat transmembrane protein kinase; Leucine-rich repeat transmembrane protein kinase	LOC_Os04g52640.1; LOC_Os04g52600.1; LOC_Os04g52640.1	SHR5-receptor-like kinase, putative, expressed; SHR5-receptor-like kinase, putative, expressed; SHR5-receptor-like kinase, putative, expressed	Zm00001d026306_T009; Zm00001d026306_T011	GRMZM2G155837_T02; GRMZM2G031536_T01	Bradi5g21870.2; Bradi5g21857.5	Sobic.006G215600.2; Sobic.006G215400.1	Seita.7G237600.1; Seita.7G237400.1
Sevir.5G406300	0.52	0.51	0.7	1.73	1.82	0.62	0.26	0.13	0.19	0.78	0.42	0.16	NA	receptor-like protein kinase HSL1-like	Protein kinase, ATP binding site;Leucine-rich repeat-containing N-terminal, type 2;Protein kinase-like domain;Serine/threonine-protein kinase, active site;Leucine-rich repeat, typical subtype;Serine/threonine- / dual specificity protein kinase, catalytic domain;Leucine-rich repeat;Protein kinase, catalytic domain	AT1G72180.1		Leucine-rich receptor-like protein kinase family protein	LOC_Os01g65650.1	receptor-like protein kinase HAIKU2 precursor, putative, expressed	Zm00001d042637_T001; Zm00001d042637_T003	GRMZM2G167253_T01; GRMZM2G135760_T01	Bradi2g56750.1	Sobic.003G375800.1	Seita.5G400800.1
Sevir.1G082700	0.47	0.61	0.98	1.42	1.33	1.03	0.16	0.13	0.2	0.17	0.16	0.14	NA	tyrosine-sulfated glycopeptide receptor 1-like	Leucine-rich repeat-containing N-terminal, type 2;Leucine-rich repeat, typical subtype;Leucine-rich repeat	AT1G17240.1	AtRLP2,RLP2	receptor like protein 2	LOC_Os02g05920.1	phytosulfokine receptor precursor, putative, expressed	Zm00001d005908_T001	GRMZM6G177089_T01	Bradi3g04280.2	Sobic.004G045200.1; Sobic.004G045700.2	Seita.1G084500.1; Seita.1G084200.1
Sevir.9G291200	0.84	0.91	0.98	0.99	1.16	0.9	0.22	0.11	0.14	0.02	0.09	0.13	NA	receptor-like protein kinase-like	Protein kinase, ATP binding site;Protein kinase-like domain;Serine/threonine-protein kinase, active site;Leucine-rich repeat, typical subtype;Serine/threonine- / dual specificity protein kinase, catalytic domain;Leucine-rich repeat;Protein kinase, catalytic domain;Concanavalin A-like lectin/glucanase, subgroup	AT1G73080.1	ATPEPR1,PEPR1	PEP1 receptor 1	LOC_Os10g06760.1	receptor-like protein kinase precursor, putative, expressed	Zm00001d030323_T001	GRMZM2G337766_T01	Bradi3g20867.1	Sobic.001G265700.1; Sobic.007G212000.1	Seita.9G287000.1; Seita.3G168500.1
Sevir.5G104000	0.68	0.86	0.99	1.06	1.04	0.93	0.05	0.09	0.11	0.25	0.24	0.27	NA		Protein kinase, ATP binding site;Protein kinase-like domain;Serine/threonine-protein kinase, active site;Leucine-rich repeat, typical subtype;Serine/threonine- / dual specificity protein kinase, catalytic domain;Leucine-rich repeat;Protein kinase, catalytic domain	AT3G47090.1		Leucine-rich repeat protein kinase family protein	LOC_Os01g05870.1	receptor kinase, putative, expressed	Zm00001d039822_T001	GRMZM2G463574_T01	NA	Sobic.003G067600.1; Sobic.002G074900.1	Seita.5G107200.1; Seita.5G106800.1
Sevir.2G189300	0.81	0.68	0.64	1.41	1.04	0.81	0.11	0.04	0.12	0.3	0.1	0.16	NA		Malectin;Protein kinase, ATP binding site;Protein kinase-like domain;Serine/threonine-protein kinase, active site;Serine/threonine- / dual specificity protein kinase, catalytic domain;Leucine-rich repeat;Serine-threonine/tyrosine-protein kinase catalytic domain;Protein kinase, catalytic domain;Concanavalin A-like lectin/glucanase, subgroup	AT1G07650.1; AT1G07650.2	;	Leucine-rich repeat transmembrane protein kinase; Leucine-rich repeat transmembrane protein kinase	LOC_Os09g17630.1; LOC_Os09g17630.1	receptor-like protein kinase 2, putative, expressed; receptor-like protein kinase 2, putative, expressed	Zm00001d020172_T001; Zm00001d020171_T001	GRMZM2G011526_T01	Bradi4g28367.1	Sobic.002G176700.1; Sobic.002G176500.1	Seita.2G182200.1; Seita.2G182000.1
Sevir.9G226600	0.69	0.79	0.77	0.96	0.98	1.18	0.15	0.31	0.25	0.3	0.42	0.14	NA	leucine-rich repeat receptor-like protein kinase TDR-like	Leucine-rich repeat, typical subtype;Leucine-rich repeat	AT2G34930.1		disease resistance family protein / LRR family protein	LOC_Os10g33140.1	hcrVf2 protein, putative, expressed	NA	NA	NA	Sobic.001G223550.1	Seita.9G227000.1
Sevir.9G207200	0.9	0.61	0.67	0.85	1	1.32	0.44	0.14	0.12	0.09	0.2	0.13	NA	inactive leucine-rich repeat receptor-like serine/threonine-protein kinase At1g60630-like	Protein kinase-like domain;Protein kinase, catalytic domain	AT4G31250.1		Leucine-rich repeat protein kinase family protein	LOC_Os10g35040.1	receptor kinase like protein, putative, expressed	Zm00001d032613_T001	GRMZM2G103929_T01	Bradi3g29770.1	Sobic.001G208600.2	Seita.9G208500.1
Sevir.5G364300	0.62	0.65	0.64	1.65	1.13	0.64	0.09	0.22	0.13	0.14	0.18	0.11	NA	probable leucine-rich repeat receptor-like protein kinase At5g49770-like	Protein kinase, ATP binding site;Protein kinase-like domain;Serine/threonine-protein kinase, active site;Serine/threonine- / dual specificity protein kinase, catalytic domain;Serine-threonine/tyrosine-protein kinase catalytic domain;Protein kinase, catalytic domain;Concanavalin A-like lectin/glucanase, subgroup	AT1G79620.1		Leucine-rich repeat protein kinase family protein	LOC_Os01g60060.1	leucine-rich repeat family protein, putative, expressed	Zm00001d043091_T003; Zm00001d043091_T004	AC193379.3_FGT001	Bradi2g53277.2	Sobic.003G335000.1	Seita.5G359200.1
Sevir.2G100400	0.77	0.65	0.82	1.32	1.03	0.62	0.07	0.13	0.26	0.33	0.29	0.07	NA	probable LRR receptor-like serine/threonine-protein kinase At1g56130-like	Malectin;Protein kinase-like domain;Serine/threonine-protein kinase, active site;Serine/threonine- / dual specificity protein kinase, catalytic domain;Serine-threonine/tyrosine-protein kinase catalytic domain;Protein kinase, catalytic domain;Concanavalin A-like lectin/glucanase, subgroup	AT1G56130.1		Leucine-rich repeat transmembrane protein kinase	LOC_Os08g10310.1	SHR5-receptor-like kinase, putative, expressed	Zm00001d024291_T001; Zm00001d024291_T004	GRMZM2G151567_T01; GRMZM2G337532_T01	Bradi5g21870.2; Bradi3g17756.3	Sobic.007G073400.1; Sobic.006G215400.1	Seita.2G097400.1; Seita.2G097500.1
Sevir.2G317300	0.99	0.68	0.74	0.96	0.95	0.84	0.34	0.17	0.18	0.47	0.23	0.15	NA		Leucine-rich repeat-containing N-terminal, type 2;Protein kinase-like domain;Leucine-rich repeat;Protein kinase, catalytic domain	AT1G78980.1	SRF5	STRUBBELIG-receptor family 5	LOC_Os09g38700.1	STRUBBELIG-RECEPTOR FAMILY 5 precursor, putative, expressed	Zm00001d006335_T003; Zm00001d006335_T002	NA	NA	Sobic.002G295800.1	Seita.2G306300.1
Sevir.3G024500	1.18	1.04	0.89	0.67	0.55	0.64	0.2	0.39	0.35	0.25	0.05	0.08	NA	probable LRR receptor-like serine/threonine-protein kinase At1g56140-like	Protein kinase-like domain;Serine/threonine-protein kinase, active site;Serine/threonine- / dual specificity protein kinase, catalytic domain;Serine-threonine/tyrosine-protein kinase catalytic domain;Protein kinase, catalytic domain;Concanavalin A-like lectin/glucanase, subgroup	AT1G56140.1		Leucine-rich repeat transmembrane protein kinase	LOC_Os04g56360.1	cysteine-rich receptor-like protein kinase 8 precursor, putative, expressed	Zm00001d001993_T002; Zm00001d001993_T001	GRMZM2G391741_T01	Bradi5g24570.1	Sobic.006G249000.1	Seita.3G023800.1
Sevir.3G204800	0.56	0.52	0.75	1	1.19	0.85	0.13	0.09	0.2	0.28	0.33	0.21	NA	probable leucine-rich repeat receptor-like protein kinase At5g49770-like	Protein kinase, ATP binding site;Leucine-rich repeat-containing N-terminal, type 2;Protein kinase-like domain;Serine/threonine-protein kinase, active site;Serine/threonine- / dual specificity protein kinase, catalytic domain;Leucine-rich repeat;Serine-threonine/tyrosine-protein kinase catalytic domain;Protein kinase, catalytic domain;Concanavalin A-like lectin/glucanase, subgroup	AT1G79620.1		Leucine-rich repeat protein kinase family protein	LOC_Os05g40770.1	leucine-rich repeat family protein, putative, expressed	Zm00001d038522_T002; Zm00001d038522_T001	GRMZM2G429714_T02; GRMZM5G851528_T01	Bradi2g21990.1; Bradi1g63550.1	Sobic.009G177400.1; Sobic.001G384500.1	Seita.3G200200.1; Seita.9G416500.1
Sevir.7G090600	1.1	1.01	0.68	0.76	0.66	0.56	0.26	0.26	0.1	0.06	0.13	0.04	NA	uncharacterized LOC101769676	Leucine-rich repeat, typical subtype;Leucine-rich repeat	AT1G27180.1		disease resistance protein (TIR-NBS-LRR class), putative	LOC_Os04g32940.1	Leucine Rich Repeat family protein, expressed	NA	NA	Bradi2g39460.1; Bradi2g39430.1	Sobic.006G062400.1; Sobic.006G062300.1	Seita.7G083400.1; Seita.7G083300.1
Sevir.4G263700	0.64	0.54	0.67	1.22	0.98	0.62	0.36	0.34	0.15	0.27	0.29	0.24	NA	tyrosine-sulfated glycopeptide receptor 1-like	Protein kinase, ATP binding site;Leucine-rich repeat-containing N-terminal, type 2;Protein kinase-like domain;Serine/threonine-protein kinase, active site;Leucine-rich repeat, typical subtype;Serine/threonine- / dual specificity protein kinase, catalytic domain;Leucine-rich repeat;Protein kinase, catalytic domain;Concanavalin A-like lectin/glucanase, subgroup	AT1G72300.1		Leucine-rich receptor-like protein kinase family protein	LOC_Os06g47650.1	phytosulfokine receptor precursor, putative, expressed	Zm00001d014557_T001; Zm00001d036534_T001	GRMZM2G177570_T01; GRMZM2G474777_T01	Bradi1g33510.1; Bradi3g04280.2	Sobic.010G241500.1; Sobic.010G242000.1	Seita.4G251500.1; Seita.4G251000.1
Sevir.5G284100	0.97	0.75	0.61	0.94	0.76	0.64	0.11	0.18	0.16	0.21	0.14	0.17	NA		Protein kinase, ATP binding site;Leucine-rich repeat-containing N-terminal, type 2;Protein kinase-like domain;Serine/threonine-protein kinase, active site;Leucine-rich repeat, typical subtype;Serine/threonine- / dual specificity protein kinase, catalytic domain;Leucine-rich repeat;Serine-threonine/tyrosine-protein kinase catalytic domain;Protein kinase, catalytic domain;Concanavalin A-like lectin…	AT3G47570.1		Leucine-rich repeat protein kinase family protein	LOC_Os01g49920.1	protein kinase, putative, expressed	Zm00001d011643_T001	GRMZM2G316907_T01; GRMZM2G316904_T01	NA	Sobic.003G265900.1	Seita.5G281500.1; Seita.5G281400.1
Sevir.4G216800	0.82	0.48	0.55	0.62	0.51	1.56	0.36	0.09	0.16	0.27	0.16	0.36	NA	protein STRUBBELIG-RECEPTOR FAMILY 8-like	Leucine-rich repeat-containing N-terminal, type 2;Protein kinase-like domain;Leucine-rich repeat;Protein kinase, catalytic domain;Concanavalin A-like lectin/glucanase, subgroup	AT4G22130.1	SRF8	STRUBBELIG-receptor family 8	LOC_Os02g09740.1	STRUBBELIG-RECEPTOR FAMILY 7 precursor, putative, expressed	Zm00001d036775_T001; Zm00001d036775_T002	GRMZM2G071573_T02; GRMZM2G162531_T02	Bradi1g35477.1	Sobic.010G199700.1	Seita.4G207500.1; Seita.1G055300.1
Sevir.2G031800	0.25	0.57	1.2	0.79	1.04	0.5	0.06	0.16	0.32	0.08	0.04	0.09	NA	probable LRR receptor-like serine/threonine-protein kinase At2g16250-like	Protein kinase-like domain;Protein kinase, catalytic domain;Concanavalin A-like lectin/glucanase, subgroup	AT2G16250.1		Leucine-rich repeat protein kinase family protein	LOC_Os07g04220.1	wound and phytochrome signaling involved receptor like kinase, putative, expressed	Zm00001d018754_T001; Zm00001d006917_T001	GRMZM2G426156_T01; GRMZM2G162781_T01	Bradi1g57910.1	Sobic.002G027700.1; Sobic.001G108400.1	Seita.2G027000.1
Sevir.3G177900	0.75	0.33	0.35	0.99	1.17	0.69	0.13	0.04	0.12	0.39	0.1	0.22	NA	receptor-like protein kinase HSL1-like	Protein kinase, ATP binding site;Leucine-rich repeat-containing N-terminal, type 2;Protein kinase-like domain;Serine/threonine-protein kinase, active site;Leucine-rich repeat, typical subtype;Serine/threonine- / dual specificity protein kinase, catalytic domain;Leucine-rich repeat;Serine-threonine/tyrosine-protein kinase catalytic domain;Protein kinase, catalytic domain	AT5G25930.1		Protein kinase family protein with leucine-rich repeat domain	LOC_Os05g44770.1	receptor-like protein kinase 5 precursor, putative, expressed	Zm00001d038791_T001; Zm00001d030942_T001	GRMZM2G132212_T01; GRMZM2G432821_T01	Bradi2g19380.1; Bradi2g49447.2	Sobic.009G203600.1	Seita.3G173800.1; Seita.4G030800.1
Sevir.4G263400	0.63	0.9	0.54	0.9	0.66	0.61	0.11	0.15	0.11	0.27	0.18	0.11	NA		Leucine-rich repeat-containing N-terminal, type 2;Leucine-rich repeat, typical subtype;Leucine-rich repeat	AT1G72300.1		Leucine-rich receptor-like protein kinase family protein	LOC_Os06g47650.1	phytosulfokine receptor precursor, putative, expressed	NA	GRMZM2G177570_T01; GRMZM2G474777_T01	Bradi1g33510.1; Bradi3g04280.2	Sobic.010G241500.1; Sobic.010G242000.1	Seita.4G251000.1; Seita.4G251500.1
Sevir.4G241800	0.55	0.65	0.57	1	0.8	0.57	0.21	0.04	0.15	0.22	0.25	0.06	NA		Protein kinase, ATP binding site;Protein kinase-like domain;Serine/threonine-protein kinase, active site;Leucine-rich repeat, typical subtype;Serine/threonine- / dual specificity protein kinase, catalytic domain;Leucine-rich repeat;Protein kinase, catalytic domain;Concanavalin A-like lectin/glucanase, subgroup	AT3G47570.1		Leucine-rich repeat protein kinase family protein	LOC_Os02g12030.1	receptor-like protein kinase precursor, putative, expressed	NA	NA	NA	NA	Seita.4G230400.1
Sevir.7G038000	1.13	1.21	0.72	0.33	0.49	0.24	0.16	0.74	0.35	0.13	0.06	0.06	NA	LRR receptor-like serine/threonine-protein kinase RCH1-like	Protein kinase, ATP binding site;Protein kinase-like domain;Serine/threonine-protein kinase, active site;Leucine-rich repeat, typical subtype;Serine/threonine- / dual specificity protein kinase, catalytic domain;Leucine-rich repeat;Protein kinase, catalytic domain	AT5G48940.1		Leucine-rich repeat transmembrane protein kinase family protein	LOC_Os04g04330.2	receptor-like protein kinase 2 precursor, putative, expressed	Zm00001d025002_T002; Zm00001d025002_T001	GRMZM2G034155_T01	Bradi5g01210.1; Bradi5g13280.1	Sobic.006G013300.1; Sobic.005G091000.1	Seita.7G017000.1; Seita.7G239900.1
Sevir.3G419900	0.55	0.22	0.35	0.8	1.04	1.14	0.24	0.07	0.12	0.26	0.44	0.38	NA	receptor-like protein kinase HAIKU2-like	Protein kinase, ATP binding site;Leucine-rich repeat-containing N-terminal, type 2;Protein kinase-like domain;Serine/threonine-protein kinase, active site;Leucine-rich repeat, typical subtype;Serine/threonine- / dual specificity protein kinase, catalytic domain;Leucine-rich repeat;Protein kinase, catalytic domain	AT1G09970.1	LRR XI-23,RLK7	Leucine-rich receptor-like protein kinase family protein	LOC_Os12g43640.1	receptor-like protein kinase HAIKU2 precursor, putative, expressed	Zm00001d041236_T001; Zm00001d031201_T001	GRMZM2G391794_T01; GRMZM2G043584_T01	Bradi4g00900.1; Bradi3g17567.1	Sobic.008G186300.1; Sobic.009G259500.1	Seita.3G402100.1; Seita.3G118800.1
Sevir.1G083100	0.86	0.76	0.72	0.73	0.67	0.31	0.09	0.23	0.12	0.14	0.11	0.05	NA		Protein kinase, ATP binding site;Leucine-rich repeat-containing N-terminal, type 2;Protein kinase-like domain;Serine/threonine-protein kinase, active site;Leucine-rich repeat, typical subtype;Serine/threonine- / dual specificity protein kinase, catalytic domain;Leucine-rich repeat;Protein kinase, catalytic domain;Concanavalin A-like lectin/glucanase, subgroup	AT1G72300.1		Leucine-rich receptor-like protein kinase family protein	LOC_Os02g05930.1	phytosulfokine receptor precursor, putative, expressed	Zm00001d053867_T001; Zm00001d015298_T001	GRMZM2G451007_T01; GRMZM2G104425_T01	Bradi3g04210.2; Bradi3g04198.1	Sobic.004G044800.1; Sobic.004G044700.1	Seita.1G085300.1; Seita.J023100.1
Sevir.2G083500	0.58	0.61	0.53	0.92	0.66	0.63	0.28	0.23	0.3	0.32	0.12	0.17	NA		Protein kinase, ATP binding site;Leucine-rich repeat-containing N-terminal, type 2;Protein kinase-like domain;Serine/threonine-protein kinase, active site;Leucine-rich repeat, typical subtype;Serine/threonine- / dual specificity protein kinase, catalytic domain;Leucine-rich repeat;Protein kinase, catalytic domain;Concanavalin A-like lectin/glucanase, subgroup	AT1G17230.1		Leucine-rich receptor-like protein kinase family protein	LOC_Os12g31470.1	retrotransposon protein, putative, unclassified, expressed	NA	NA	NA	NA	Seita.6G034700.1; Seita.6G035200.1
Sevir.2G218100	0.66	0.34	0.36	0.81	1.03	0.66	0.26	0.05	0.15	0.16	0.06	0.07	NA	putative leucine-rich repeat receptor-like serine/threonine-protein kinase At2g24130-like	Protein kinase, ATP binding site;Leucine-rich repeat-containing N-terminal, type 2;Protein kinase-like domain;Serine/threonine-protein kinase, active site;Leucine-rich repeat, typical subtype;Serine/threonine- / dual specificity protein kinase, catalytic domain;Leucine-rich repeat;Protein kinase, catalytic domain;Concanavalin A-like lectin/glucanase, subgroup	AT2G24130.1		Leucine-rich receptor-like protein kinase family protein	LOC_Os09g25540.1	receptor-like protein kinase 2 precursor, putative, expressed	Zm00001d020533_T001; Zm00001d005776_T002	GRMZM2G084248_T01; GRMZM2G002569_T01	Bradi4g30560.3; Bradi1g47097.1	Sobic.002G205900.1; Sobic.010G067400.1	Seita.2G209400.1; Seita.5G404500.1
Sevir.8G111700	0.37	0.25	0.23	0.58	0.6	1.75	0.14	0.04	0.1	0.06	0.15	0.35	NA	probable inactive leucine-rich repeat receptor-like protein kinase At1g66830-like	Leucine-rich repeat-containing N-terminal, type 2;Protein kinase-like domain;Leucine-rich repeat, typical subtype;Leucine-rich repeat;Protein kinase, catalytic domain	AT1G67510.1		Leucine-rich repeat protein kinase family protein	LOC_Os11g19480.1	receptor protein kinase-like protein At4g34220 precursor, putative, expressed	Zm00001d004635_T002; Zm00001d024047_T001	AC235540.1_FGT002; GRMZM5G802572_T01	Bradi4g39617.1; Bradi4g20174.1	Sobic.001G037400.1; Sobic.008G083300.1	Seita.8G108000.1; Seita.3G090400.1
Sevir.5G103500	0.75	0.7	0.68	0.6	0.48	0.41	0.08	0.17	0.09	0.08	0.09	0.13	NA		Protein kinase, ATP binding site;Leucine-rich repeat-containing N-terminal, type 2;Protein kinase-like domain;Serine/threonine-protein kinase, active site;Leucine-rich repeat, typical subtype;Serine/threonine- / dual specificity protein kinase, catalytic domain;Leucine-rich repeat;Protein kinase, catalytic domain;Concanavalin A-like lectin/glucanase, subgroup	AT3G47570.1		Leucine-rich repeat protein kinase family protein	LOC_Os01g05960.1	receptor kinase, putative, expressed	Zm00001d039822_T001; Zm00001d039824_T001	GRMZM2G463574_T01; GRMZM2G463580_T01	NA	Sobic.003G067600.1; Sobic.003G069601.1	Seita.5G106800.1; Seita.5G106900.1
Sevir.8G137400	0.79	0.7	0.53	0.53	0.46	0.39	0.19	0.12	0.27	0.07	0.2	0.18	NA	probable LRR receptor-like serine/threonine-protein kinase At1g56140-like	Protein kinase, ATP binding site;Protein kinase-like domain;Serine/threonine-protein kinase, active site;Serine/threonine- / dual specificity protein kinase, catalytic domain;Protein kinase, catalytic domain;Concanavalin A-like lectin/glucanase, subgroup	AT3G55950.1	ATCRR3,CCR3	CRINKLY4 related 3	LOC_Os11g44430.1	protein kinase, putative, expressed	NA	NA	NA	NA	Seita.8G130000.1; Seita.8G129900.1
Sevir.7G273700	1.04	0.37	0.45	0.61	0.43	0.46	0.27	0.39	0.38	0.35	0.3	0.06	NA	probable LRR receptor-like serine/threonine-protein kinase At4g36180-like	Leucine-rich repeat-containing N-terminal, type 2;Leucine-rich repeat, typical subtype;Leucine-rich repeat	AT1G74190.1	AtRLP15,RLP15	receptor like protein 15	LOC_Os04g55420.1	leucine-rich repeat family protein, putative, expressed	NA	NA	NA	NA	Seita.7G262300.1
Sevir.5G284000	0.64	0.41	0.35	1.11	0.51	0.28	0.2	0.02	0.11	0.55	0.24	0.11	NA		Protein kinase, ATP binding site;Leucine-rich repeat-containing N-terminal, type 2;Protein kinase-like domain;Serine/threonine-protein kinase, active site;Leucine-rich repeat, typical subtype;Serine/threonine- / dual specificity protein kinase, catalytic domain;Leucine-rich repeat;Protein kinase, catalytic domain;Concanavalin A-like lectin/glucanase, subgroup	AT3G47570.1; AT3G47570.1	;	Leucine-rich repeat protein kinase family protein; Leucine-rich repeat protein kinase family protein	LOC_Os11g47030.1; LOC_Os01g49920.1	receptor protein kinase, putative, expressed; protein kinase, putative, expressed	Zm00001d011643_T001	GRMZM2G316907_T01; GRMZM2G316904_T01	NA	Sobic.003G265900.1	Seita.5G281400.1; Seita.5G281200.1
Sevir.3G406700	0.05	0.13	0.29	1.55	0.97	0.23	0.04	0.06	0.04	0.62	0.47	0.13	NA	LRR receptor-like serine/threonine-protein kinase EFR-like	Protein kinase, ATP binding site;Leucine-rich repeat-containing N-terminal, type 2;Protein kinase-like domain;Serine/threonine-protein kinase, active site;Leucine-rich repeat, typical subtype;Serine/threonine- / dual specificity protein kinase, catalytic domain;Leucine-rich repeat;Serine-threonine/tyrosine-protein kinase catalytic domain;Protein kinase, catalytic domain;Concanavalin A-like lectin…	AT5G20480.1	EFR	EF-TU receptor	LOC_Os12g42520.1	receptor kinase, putative, expressed	NA	NA	NA	Sobic.008G175032.1	Seita.3G389600.1; Seita.3G389700.1
Sevir.5G365800	0.4	0.23	0.23	0.8	0.82	0.62	0.15	0.09	0.12	0.33	0.13	0.16	NA	NA	NA	AT1G06840.1		Leucine-rich repeat protein kinase family protein	LOC_Os05g40270.5	expressed protein	Zm00001d043075_T013; Zm00001d043075_T019	GRMZM2G069201_T01; GRMZM2G038165_T01	Bradi2g53400.1; Bradi2g22140.3	Sobic.003G336700.1; Sobic.009G175600.1	Seita.5G360600.1; Seita.3G202400.1
Sevir.4G027600	0.32	0.41	0.32	0.78	0.76	0.5	0.17	0.05	0.18	0.06	0.09	0.14	NA	LRR receptor-like serine/threonine-protein kinase GSO2-like	Leucine-rich repeat-containing N-terminal, type 2;Leucine-rich repeat, typical subtype;Leucine-rich repeat	AT2G34930.1		disease resistance family protein / LRR family protein	LOC_Os06g04810.1	leucine rich repeat protein, putative, expressed	NA	NA	NA	NA	Seita.4G028600.1; Seita.4G022500.1
Sevir.1G083300	0.46	0.49	0.48	0.74	0.51	0.4	0.15	0.14	0.15	0.08	0.07	0.1	NA	tyrosine-sulfated glycopeptide receptor 1-like	Protein kinase, ATP binding site;Leucine-rich repeat-containing N-terminal, type 2;Protein kinase-like domain;Serine/threonine-protein kinase, active site;Leucine-rich repeat, typical subtype;Serine/threonine- / dual specificity protein kinase, catalytic domain;Leucine-rich repeat;Protein kinase, catalytic domain;Concanavalin A-like lectin/glucanase, subgroup	AT1G72300.1		Leucine-rich receptor-like protein kinase family protein	LOC_Os02g05980.1	phytosulfokine receptor precursor, putative, expressed	Zm00001d015298_T001; Zm00001d053867_T001	GRMZM2G451007_T01; GRMZM2G104425_T01	Bradi3g04290.1; Bradi3g04253.1	Sobic.004G044700.1; Sobic.004G044800.1	Seita.1G085500.1; Seita.1G085300.1
Sevir.9G420600	0.72	0.42	0.35	0.46	0.3	0.82	0.2	0.15	0.1	0.19	0.15	0.14	NA		Protein kinase, ATP binding site;Protein kinase-like domain;Serine/threonine-protein kinase, active site;Serine/threonine- / dual specificity protein kinase, catalytic domain;Serine-threonine/tyrosine-protein kinase catalytic domain;Protein kinase, catalytic domain;Concanavalin A-like lectin/glucanase, subgroup	AT1G79620.1		Leucine-rich repeat protein kinase family protein	LOC_Os03g21230.1	leucine-rich repeat family protein, putative, expressed	Zm00001d029012_T003; Zm00001d029012_T002	GRMZM2G023715_T01; GRMZM2G429714_T02	Bradi1g63550.1; Bradi2g21990.1	Sobic.001G384500.1; Sobic.009G177400.1	Seita.9G416500.1; Seita.3G200200.1
Sevir.1G250300	0.04	0.07	0.11	1.23	1.02	0.58	0.04	0.04	0.04	0.33	0.1	0.27	NA		Protein kinase, ATP binding site;Leucine-rich repeat-containing N-terminal, type 2;Protein kinase-like domain;Serine/threonine-protein kinase, active site;Leucine-rich repeat, typical subtype;Serine/threonine- / dual specificity protein kinase, catalytic domain;Leucine-rich repeat;Protein kinase, catalytic domain;Concanavalin A-like lectin/glucanase, subgroup	AT3G47090.1		Leucine-rich repeat protein kinase family protein	LOC_Os11g36090.1	receptor kinase, putative, expressed	NA	NA	Bradi4g16136.2	Sobic.004G288200.1	Seita.1G246000.1; Seita.6G067100.1
Sevir.3G151200	0.26	0.13	0.12	0.64	0.61	1.25	0.11	0.13	0.1	0.31	0.21	0.08	NA	probable LRR receptor-like serine/threonine-protein kinase MRH1-like	Protein kinase-like domain;Serine-threonine/tyrosine-protein kinase catalytic domain;Protein kinase, catalytic domain	AT5G45840.2; AT5G45840.2	;	Leucine-rich repeat protein kinase family protein; Leucine-rich repeat protein kinase family protein	LOC_Os05g48660.2; LOC_Os05g48660.1	MRH1, putative, expressed; MRH1, putative, expressed	Zm00001d038991_T001	GRMZM2G079583_T01	NA	Sobic.009G230100.4	Seita.3G148600.1
Sevir.6G237300	0.53	0.49	0.41	0.46	0.51	0.42	0.03	0.02	0.16	0.19	0.13	0.23	NA	probable LRR receptor-like serine/threonine-protein kinase At1g34110-like	Leucine-rich repeat-containing N-terminal, type 2;Leucine-rich repeat, typical subtype;Leucine-rich repeat	AT2G34930.1		disease resistance family protein / LRR family protein	LOC_Os08g42840.1	leucine rich repeat protein, putative, expressed	NA	NA	Bradi3g41810.1	Sobic.007G185000.2	Seita.6G230900.1
Sevir.8G051200	0.05	0.01	0.02	1.39	0.77	0.55	0.02	0.02	0.02	1	0.35	0.17	NA		Protein kinase, ATP binding site;Protein kinase-like domain;Serine/threonine-protein kinase, active site;Leucine-rich repeat, typical subtype;Serine/threonine- / dual specificity protein kinase, catalytic domain;Leucine-rich repeat;Protein kinase, catalytic domain;Concanavalin A-like lectin/glucanase, subgroup	AT3G47570.1		Leucine-rich repeat protein kinase family protein	LOC_Os01g12790.1	receptor protein kinase, putative, expressed	NA	NA	Bradi4g10998.1; Bradi1g01442.2	NA	Seita.8G050400.1; Seita.8G049600.1
Sevir.1G021700	1.35	0.67	0.26	0.16	0.18	0.12	0.31	0.15	0.11	0.13	0.07	0.06	NA	probable LRR receptor-like serine/threonine-protein kinase At2g24230-like	Protein kinase-like domain;Leucine-rich repeat;Serine-threonine/tyrosine-protein kinase catalytic domain;Protein kinase, catalytic domain	AT5G45800.1	MEE62	Leucine-rich repeat protein kinase family protein	LOC_Os02g14480.1	receptor-like kinase, putative, expressed	Zm00001d053518_T001	GRMZM2G017022_T01	Bradi1g40980.1	Sobic.004G106200.1	Seita.1G021900.1; Seita.4G175900.1
Sevir.5G102500	0.72	0.23	0.14	0.31	0.32	0.92	0.42	0.05	0.11	0.28	0.16	0.35	NA	probable LRR receptor-like serine/threonine-protein kinase At3g47570-like	Protein kinase, ATP binding site;Leucine-rich repeat-containing N-terminal, type 2;Protein kinase-like domain;Serine/threonine-protein kinase, active site;Leucine-rich repeat, typical subtype;Serine/threonine- / dual specificity protein kinase, catalytic domain;Leucine-rich repeat;Protein kinase, catalytic domain;Concanavalin A-like lectin/glucanase, subgroup	AT3G47580.1		Leucine-rich repeat protein kinase family protein	LOC_Os01g05870.1	receptor kinase, putative, expressed	NA	NA	NA	Sobic.003G069601.1	Seita.5G105300.1; Seita.5G106500.1
Sevir.3G207400	0.31	0.73	0.52	0.38	0.45	0.23	0.14	0.13	0.15	0.12	0.09	0.09	NA	probable LRR receptor-like serine/threonine-protein kinase At1g06840-like	Protein kinase, ATP binding site;Leucine-rich repeat-containing N-terminal, type 2;Protein kinase-like domain;Serine/threonine-protein kinase, active site;Serine/threonine- / dual specificity protein kinase, catalytic domain;Protein kinase, catalytic domain;Concanavalin A-like lectin/glucanase, subgroup	AT1G06840.1; AT3G53590.1; AT1G06840.1; AT1G06840.1; AT1G06840.1	; ; ; ;	Leucine-rich repeat protein kinase family protein; Leucine-rich repeat protein kinase family protein; Leucine-rich repeat protein kinase family protein; Leucine-rich repeat protein kinase family protein; Leucine-rich repeat protein kinase family protein	LOC_Os05g40270.5; LOC_Os01g72990.2; LOC_Os05g40270.3; LOC_Os05g40270.2; LOC_Os05g40270.7	expressed protein; expressed protein; expressed protein; expressed protein; expressed protein	Zm00001d038494_T015; Zm00001d038494_T011	GRMZM2G174585_T01; GRMZM2G089461_T01	Bradi2g22140.3; Bradi2g53400.1	Sobic.009G175600.1; Sobic.003G336700.1	Seita.3G202400.1; Seita.5G360600.1
Sevir.5G110800	0.31	0.54	0.3	0.69	0.38	0.38	0.09	0.11	0.11	0.2	0.15	0.1	NA		Leucine-rich repeat	AT2G33050.1	AtRLP26,RLP26	receptor like protein 26	LOC_Os01g06900.1	verticillium wilt disease resistance protein Ve2, putative, expressed	NA	NA	NA	Sobic.003G059100.2	Seita.5G114100.1; Seita.2G052900.1
Sevir.1G036500	0.22	0.28	0.21	0.8	0.63	0.37	0.12	0.08	0.08	0.18	0.16	0.18	NA	probable LRR receptor-like serine/threonine-protein kinase At3g47570-like	Protein kinase, ATP binding site;Protein kinase-like domain;Serine/threonine-protein kinase, active site;Leucine-rich repeat, typical subtype;Serine/threonine- / dual specificity protein kinase, catalytic domain;Leucine-rich repeat;Serine-threonine/tyrosine-protein kinase catalytic domain;Protein kinase, catalytic domain;Concanavalin A-like lectin/glucanase, subgroup	AT3G47570.1		Leucine-rich repeat protein kinase family protein	LOC_Os02g12400.1	receptor-like protein kinase precursor, putative, expressed	NA	NA	NA	Sobic.004G091300.1; Sobic.010G228800.1	Seita.1G037300.1; Seita.1G037000.1
Sevir.8G255000	0.26	0.28	0.31	0.63	0.32	0.38	0.11	0.1	0.04	0.04	0.11	0.17	NA			AT1G51850.1		Leucine-rich repeat protein kinase family protein	LOC_Os08g40650.1	senescence-induced receptor-like serine/threonine-protein kinase precursor, putative, expressed	NA	NA	NA	NA	Seita.8G244300.1
Sevir.1G092800	0.19	0.13	0.18	0.61	0.49	0.58	0.07	0.02	0.04	0.25	0.08	0.15	NA	protein STRUBBELIG-RECEPTOR FAMILY 1-like	Protein kinase-like domain;Leucine-rich repeat;Serine-threonine/tyrosine-protein kinase catalytic domain;Protein kinase, catalytic domain	AT4G03390.1	SRF3	STRUBBELIG-receptor family 3	LOC_Os02g04430.1	STRUBBELIG-RECEPTOR FAMILY 1 precursor, putative, expressed	Zm00001d015202_T001	GRMZM2G398559_T01	NA	Sobic.004G034200.3	Seita.1G094200.1
Sevir.8G167800	0.24	0.35	0.4	0.45	0.4	0.28	0.08	0	0.19	0.05	0.1	0.08	NA	probable LRR receptor-like serine/threonine-protein kinase At3g47570-like	Protein kinase, ATP binding site;Leucine-rich repeat-containing N-terminal, type 2;Protein kinase-like domain;Serine/threonine-protein kinase, active site;Leucine-rich repeat, typical subtype;Serine/threonine- / dual specificity protein kinase, catalytic domain;Leucine-rich repeat;Protein kinase, catalytic domain;Concanavalin A-like lectin/glucanase, subgroup	AT3G47570.1; AT3G47570.1	;	Leucine-rich repeat protein kinase family protein; Leucine-rich repeat protein kinase family protein	LOC_Os11g36150.1; LOC_Os11g36190.1	receptor-like protein kinase 2 precursor, putative, expressed; receptor kinase, putative, expressed	NA	NA	Bradi4g16130.2; Bradi4g08300.2	NA	Seita.8G157600.1; Seita.8G157400.1
Sevir.7G283900	0.17	0.7	0.51	0.31	0.23	0.13	0.12	0.19	0.28	0.23	0.36	0.17	NA	NA	NA	AT1G35710.1		Protein kinase family protein with leucine-rich repeat domain	LOC_Os11g10310.1	receptor-like protein kinase 2 precursor, putative, expressed	NA	NA	NA	NA	Seita.7G273000.1
Sevir.6G076900	0.15	0.27	0.31	0.48	0.42	0.36	0.09	0.08	0.08	0.11	0.04	0.06	NA		Leucine-rich repeat-containing N-terminal, type 2;Protein kinase-like domain;Serine/threonine-protein kinase, active site;Leucine-rich repeat, typical subtype;Serine/threonine- / dual specificity protein kinase, catalytic domain;Leucine-rich repeat;Protein kinase, catalytic domain	AT3G47570.1		Leucine-rich repeat protein kinase family protein	LOC_Os04g15660.1	receptor kinase, putative, expressed	NA	NA	Bradi5g03960.3	Sobic.006G030300.1	Seita.9G331700.1
Sevir.2G199400	0.57	0.25	0.29	0.3	0.19	0.3	0.37	0.12	0.12	0.22	0.14	0.1	NA	probable leucine-rich repeat receptor-like protein kinase At5g49770-like	Protein kinase, ATP binding site;Protein kinase-like domain;Serine/threonine-protein kinase, active site;Protein kinase, catalytic domain;Concanavalin A-like lectin/glucanase, subgroup	AT1G24030.2; AT1G24030.2	;	Protein kinase superfamily protein; Protein kinase superfamily protein	LOC_Os09g20880.1; LOC_Os09g20880.2	serine/threonine-protein kinase, putative, expressed; serine/threonine-protein kinase, putative, expressed	Zm00001d005682_T001; Zm00001d039967_T001	GRMZM2G110412_T01; GRMZM2G309897_T01	Bradi4g29290.3	Sobic.002G187400.1; Sobic.007G019600.1	Seita.2G191800.1
Sevir.3G420100	0.61	0.23	0.25	0.18	0.27	0.3	0.33	0.08	0.09	0.01	0.15	0.16	NA	receptor-like protein kinase HAIKU2-like	Protein kinase, ATP binding site;Protein kinase-like domain;Serine/threonine-protein kinase, active site;Serine/threonine- / dual specificity protein kinase, catalytic domain;Leucine-rich repeat;Protein kinase, catalytic domain	AT5G49660.1		Leucine-rich repeat transmembrane protein kinase family protein	LOC_Os12g43660.1	receptor-like protein kinase HAIKU2 precursor, putative, expressed	Zm00001d031201_T001; Zm00001d041232_T001	GRMZM2G093809_T01; GRMZM2G080503_T01	Bradi4g00877.1; Bradi3g35137.1	Sobic.008G186400.1; Sobic.007G115400.1	Seita.3G402300.1; Seita.4G281800.1
Sevir.4G155700	0.25	0.37	0.48	0.33	0.19	0.14	0.1	0.08	0.2	0.18	0.09	0.09	NA	probably inactive leucine-rich repeat receptor-like protein kinase At1g50610-like	Protein kinase-like domain;Protein kinase, catalytic domain	AT4G31250.1		Leucine-rich repeat protein kinase family protein	LOC_Os06g45240.1	inactive receptor kinase At2g26730 precursor, putative, expressed	Zm00001d046938_T001; Zm00001d053769_T001	GRMZM2G029407_T01; GRMZM2G353659_T01	Bradi1g31730.1; Bradi3g05540.1	Sobic.010G218600.1; Sobic.004G059200.1	Seita.4G187200.1; Seita.1G069000.1
Sevir.3G101200	0.43	0.39	0.24	0.25	0.24	0.18	0.25	0.05	0.07	0.06	0.07	0.04	NA	probable LRR receptor-like serine/threonine-protein kinase At4g26540-like	Protein kinase, ATP binding site;Leucine-rich repeat-containing N-terminal, type 2;Protein kinase-like domain;Serine/threonine-protein kinase, active site;Leucine-rich repeat, typical subtype;Serine/threonine- / dual specificity protein kinase, catalytic domain;Leucine-rich repeat;Protein kinase, catalytic domain	AT5G56040.2		Leucine-rich receptor-like protein kinase family protein	LOC_Os05g07740.1	receptor-like protein kinase 2 precursor, putative, expressed	Zm00001d037672_T001; Zm00001d008715_T001	GRMZM2G131609_T01; GRMZM2G463493_T01	Bradi2g34380.1; Bradi2g04330.1	Sobic.009G060700.1; Sobic.003G052100.2	Seita.3G100800.1; Seita.5G120300.1
Sevir.8G146400	0.2	0.05	0.09	0.46	0.48	0.35	0.09	0.05	0.07	0.19	0.2	0.11	NA		Leucine-rich repeat, typical subtype;NB-ARC;P-loop containing nucleoside triphosphate hydrolase	AT1G27170.1		transmembrane receptors;ATP binding	LOC_Os11g46200.1	Leucine Rich Repeat family protein, expressed	NA	NA	NA	NA	Seita.8G136800.1; Seita.8G238800.1
Sevir.8G087100	0.22	0.08	0.16	0.53	0.48	0.15	0.17	0.06	0.06	0.15	0.17	0.14	NA		Protein kinase, ATP binding site;Leucine-rich repeat-containing N-terminal, type 2;Protein kinase-like domain;Serine/threonine-protein kinase, active site;Leucine-rich repeat, typical subtype;Serine/threonine- / dual specificity protein kinase, catalytic domain;Leucine-rich repeat;Protein kinase, catalytic domain	AT1G72180.1		Leucine-rich receptor-like protein kinase family protein	LOC_Os11g12530.1	receptor-like protein kinase 5 precursor, putative, expressed	Zm00001d048962_T001; Zm00001d014967_T008	GRMZM2G011896_T01; GRMZM5G867376_T01	Bradi4g21836.2; Bradi2g21990.1	Sobic.005G091300.2; Sobic.009G177400.1	Seita.8G085200.1; Seita.3G200200.1
Sevir.8G167600	0.6	0.12	0.1	0.43	0.19	0.15	0.22	0.04	0.02	0.18	0.04	0.1	NA		Protein kinase, ATP binding site;Leucine-rich repeat-containing N-terminal, type 2;Protein kinase-like domain;Serine/threonine-protein kinase, active site;Leucine-rich repeat, typical subtype;Serine/threonine- / dual specificity protein kinase, catalytic domain;Leucine-rich repeat;Serine-threonine/tyrosine-protein kinase catalytic domain;Protein kinase, catalytic domain;Concanavalin A-like lectin…	AT3G47570.1		Leucine-rich repeat protein kinase family protein	LOC_Os11g36150.1	receptor-like protein kinase 2 precursor, putative, expressed	NA	NA	Bradi4g08300.2; Bradi4g16130.2	NA	Seita.8G157300.1; Seita.8G157000.1
Sevir.1G083500	0.26	0.24	0.24	0.25	0.31	0.2	0.08	0.02	0.09	0.1	0.03	0.1	NA		Protein kinase, ATP binding site;Leucine-rich repeat-containing N-terminal, type 2;Protein kinase-like domain;Serine/threonine-protein kinase, active site;Leucine-rich repeat, typical subtype;Serine/threonine- / dual specificity protein kinase, catalytic domain;Leucine-rich repeat;Protein kinase, catalytic domain;Concanavalin A-like lectin/glucanase, subgroup	AT1G72300.1		Leucine-rich receptor-like protein kinase family protein	LOC_Os02g05920.1	phytosulfokine receptor precursor, putative, expressed	Zm00001d015298_T001; Zm00001d053867_T001	GRMZM2G104425_T01; GRMZM2G451007_T01	Bradi3g04176.1; Bradi3g04187.1	Sobic.004G044700.1; Sobic.004G044500.1	Seita.1G085700.1; Seita.J023000.1
Sevir.5G103100	0.16	0.13	0.07	0.31	0.38	0.42	0.08	0.11	0.09	0.22	0.15	0.17	NA	probable LRR receptor-like serine/threonine-protein kinase At3g47570-like	Protein kinase, ATP binding site;Leucine-rich repeat-containing N-terminal, type 2;Protein kinase-like domain;Serine/threonine-protein kinase, active site;Leucine-rich repeat, typical subtype;Serine/threonine- / dual specificity protein kinase, catalytic domain;Leucine-rich repeat;Protein kinase, catalytic domain;Concanavalin A-like lectin/glucanase, subgroup	AT5G20480.1	EFR	EF-TU receptor	LOC_Os01g05870.1	receptor kinase, putative, expressed	NA	NA	Bradi1g47990.1	NA	Seita.5G104800.1; Seita.5G106400.1
Sevir.5G283700	0.06	0.14	0.25	0.39	0.38	0.21	0.04	0.04	0.08	0.07	0.11	0.08	NA		Protein kinase, ATP binding site;Leucine-rich repeat-containing N-terminal, type 2;Protein kinase-like domain;Serine/threonine-protein kinase, active site;Leucine-rich repeat, typical subtype;Serine/threonine- / dual specificity protein kinase, catalytic domain;Leucine-rich repeat;Serine-threonine/tyrosine-protein kinase catalytic domain;Protein kinase, catalytic domain;Concanavalin A-like lectin…	AT3G47570.1		Leucine-rich repeat protein kinase family protein	LOC_Os11g47030.1	receptor protein kinase, putative, expressed	Zm00001d011641_T001	GRMZM2G360219_T01	NA	Sobic.010G061300.2; Sobic.003G265600.1	Seita.5G281000.1
Sevir.6G100000	0.16	0.17	0.24	0.3	0.32	0.2	0.06	0.09	0.05	0.07	0.09	0.09	NA	putative receptor-like protein kinase At3g47110-like	Protein kinase, ATP binding site;Leucine-rich repeat-containing N-terminal, type 2;Protein kinase-like domain;Serine/threonine-protein kinase, active site;Leucine-rich repeat, typical subtype;Serine/threonine- / dual specificity protein kinase, catalytic domain;Leucine-rich repeat;Protein kinase, catalytic domain;Concanavalin A-like lectin/glucanase, subgroup	AT3G47570.1		Leucine-rich repeat protein kinase family protein	LOC_Os11g41100.1	expressed protein	NA	NA	Bradi4g12990.1	Sobic.005G205100.1; Sobic.005G205300.1	Seita.6G130400.1; Seita.8G160700.1
Sevir.9G056400	0.15	0.17	0.12	0.13	0.15	0.67	0.1	0.05	0.04	0.19	0.11	0.25	NA	leucine-rich repeat extensin-like protein 6-like	Leucine-rich repeat-containing N-terminal, type 2;Leucine-rich repeat	AT3G22800.1		Leucine-rich repeat (LRR) family protein	LOC_Os03g58110.1	uncharacterized protein At4g06744 precursor, putative, expressed	Zm00001d034427_T001; Zm00001d013080_T001	GRMZM2G070322_T01; GRMZM5G885126_T01	Bradi1g05600.1	Sobic.001G058300.1	Seita.9G057000.1; Seita.2G050800.1
Sevir.4G151500	0.21	0.2	0.17	0.37	0.26	0.18	0.06	0.13	0.04	0.1	0.12	0.05	NA		Protein kinase-like domain;Serine/threonine-protein kinase, active site;Serine/threonine- / dual specificity protein kinase, catalytic domain;Leucine-rich repeat;Protein kinase, catalytic domain	AT5G25930.1		Protein kinase family protein with leucine-rich repeat domain	LOC_Os06g36320.1	receptor-like protein kinase 5 precursor, putative, expressed	NA	NA	NA	Sobic.010G167700.1	Seita.4G183400.1
Sevir.2G256300	0.46	0.31	0.23	0.08	0.15	0.09	0.31	0.09	0.04	0.04	0.04	0.04	NA	probable LRR receptor-like serine/threonine-protein kinase At4g26540-like	Protein kinase, ATP binding site;Leucine-rich repeat-containing N-terminal, type 2;Protein kinase-like domain;Serine/threonine-protein kinase, active site;Leucine-rich repeat, typical subtype;Serine/threonine- / dual specificity protein kinase, catalytic domain;Leucine-rich repeat;Protein kinase, catalytic domain	AT5G56040.2		Leucine-rich receptor-like protein kinase family protein	LOC_Os09g30190.1	receptor-like protein kinase 2 precursor, putative, expressed	Zm00001d020862_T001; Zm00001d005986_T001	GRMZM2G149051_T01; AC233861.1_FGT001	Bradi4g33160.1; Bradi3g39150.1	Sobic.002G239700.1; Sobic.007G220400.1	Seita.2G245500.1; Seita.6G194500.1
Sevir.4G113600	0.27	0.31	0.17	0.22	0.19	0.1	0.13	0.05	0.05	0.09	0.07	0.03	NA		Leucine-rich repeat, typical subtype;Leucine-rich repeat	AT1G74180.1	AtRLP14,RLP14	receptor like protein 14	LOC_Os04g55420.1	leucine-rich repeat family protein, putative, expressed	NA	NA	NA	Sobic.006G239900.1	Seita.4G114000.1
Sevir.5G364400	0.13	0.13	0.12	0.38	0.16	0.25	0.05	0.05	0.05	0.19	0.04	0.1	NA	probable leucine-rich repeat receptor-like protein kinase At5g49770-like	Protein kinase, ATP binding site;Protein kinase-like domain;Serine/threonine-protein kinase, active site;Serine/threonine- / dual specificity protein kinase, catalytic domain;Serine-threonine/tyrosine-protein kinase catalytic domain;Protein kinase, catalytic domain;Concanavalin A-like lectin/glucanase, subgroup	AT1G79620.1		Leucine-rich repeat protein kinase family protein	LOC_Os05g40770.1	leucine-rich repeat family protein, putative, expressed	Zm00001d043091_T001; Zm00001d043091_T002	GRMZM2G577191_T01	Bradi2g53283.1; Bradi1g63550.1	Sobic.003G335100.1	Seita.5G359300.1; Seita.8G177800.1
Sevir.5G294700	0.68	0.22	0.11	0.07	0.01	0.06	0.15	0.09	0.08	0.09	0.02	0.06	NA	probable leucine-rich repeat receptor-like protein kinase At1g68400-like	Leucine-rich repeat-containing N-terminal, type 2;Protein kinase-like domain;Leucine-rich repeat;Serine-threonine/tyrosine-protein kinase catalytic domain;Protein kinase, catalytic domain	AT1G68400.1		leucine-rich repeat transmembrane protein kinase family protein	LOC_Os01g51400.1	Leucine Rich Repeat family protein, expressed	Zm00001d011707_T001; Zm00001d039967_T001	GRMZM2G144923_T01; GRMZM2G309897_T01	Bradi2g48000.1; Bradi2g02290.1	Sobic.003G274900.1; Sobic.003G083500.1	Seita.5G291700.1; Seita.6G153100.1
Sevir.1G082500	0.16	0.19	0.17	0.27	0.21	0.14	0.13	0.03	0.09	0.09	0.09	0.04	NA	tyrosine-sulfated glycopeptide receptor 1-like	Leucine-rich repeat-containing N-terminal, type 2;Leucine-rich repeat, typical subtype;Leucine-rich repeat	AT1G72300.1		Leucine-rich receptor-like protein kinase family protein	LOC_Os02g05920.1	phytosulfokine receptor precursor, putative, expressed	Zm00001d005908_T001	GRMZM6G177089_T01	Bradi3g04176.1; Bradi3g04280.2	Sobic.004G045200.1; Sobic.004G045800.2	Seita.1G084500.1; Seita.1G084300.1
Sevir.1G029500	0.08	0.08	0.16	0.23	0.27	0.24	0.06	0.05	0.07	0.07	0.07	0.14	NA	receptor-like protein kinase HSL1-like	Leucine rich repeat 4;Protein kinase, ATP binding site;Leucine-rich repeat-containing N-terminal, type 2;Protein kinase-like domain;Serine/threonine-protein kinase, active site;Leucine-rich repeat, typical subtype;Serine/threonine- / dual specificity protein kinase, catalytic domain;Leucine-rich repeat;Protein kinase, catalytic domain	AT5G25930.1		Protein kinase family protein with leucine-rich repeat domain	LOC_Os02g13510.1	receptor-like protein kinase 5 precursor, putative, expressed	Zm00001d016285_T001; Zm00001d036972_T001	GRMZM2G176206_T01; GRMZM2G449817_T01	Bradi3g08660.1; Bradi1g30160.1	Sobic.004G099700.1; Sobic.004G111200.1	Seita.1G028700.1; Seita.5G027200.1
Sevir.9G044100	0.07	0.04	0.07	0.22	0.22	0.4	0.06	0.04	0.04	0.14	0.12	0.17	NA	probable LRR receptor-like serine/threonine-protein kinase At3g47570-like	Protein kinase, ATP binding site;Leucine-rich repeat-containing N-terminal, type 2;Protein kinase-like domain;Serine/threonine-protein kinase, active site;Leucine-rich repeat, typical subtype;Serine/threonine- / dual specificity protein kinase, catalytic domain;Leucine-rich repeat;Protein kinase, catalytic domain;Concanavalin A-like lectin/glucanase, subgroup	AT3G47570.1		Leucine-rich repeat protein kinase family protein	LOC_Os01g05960.1	receptor kinase, putative, expressed	NA	NA	NA	Sobic.003G070025.1	Seita.5G106100.1; Seita.5G105200.1
Sevir.1G121500	0.03	0.22	0.15	0.18	0.14	0.26	0.04	0.07	0.07	0.17	0.13	0.06	NA		Leucine-rich repeat-containing N-terminal, type 2;Leucine-rich repeat, typical subtype;Leucine-rich repeat	AT2G34930.1		disease resistance family protein / LRR family protein	LOC_Os02g17400.1	leucine rich repeat protein, putative, expressed	NA	NA	NA	NA	Seita.1G122700.1
Sevir.4G190300	0.18	0.09	0.14	0.13	0.2	0.22	0.03	0.02	0.06	0.04	0.09	0.05	NA	leucine-rich repeat receptor-like serine/threonine/tyrosine-protein kinase SOBIR1-like	Protein kinase-like domain;Serine/threonine-protein kinase, active site;Serine/threonine- / dual specificity protein kinase, catalytic domain;Protein kinase, catalytic domain	AT2G31880.1	EVR,SOBIR1	Leucine-rich repeat protein kinase family protein	LOC_Os06g18000.1	protein kinase domain containing protein, expressed	Zm00001d045785_T001	GRMZM2G027958_T01	Bradi1g43417.1	Sobic.010G120800.1	Seita.4G126700.1; Seita.4G126800.1
Sevir.1G117600	0.23	0.05	0.1	0.19	0.23	0.12	0.13	0.03	0.03	0.05	0.09	0.08	NA	phytosulfokine receptor 1-like	Protein kinase, ATP binding site;Leucine-rich repeat-containing N-terminal, type 2;Protein kinase-like domain;Serine/threonine-protein kinase, active site;Leucine-rich repeat, typical subtype;Serine/threonine- / dual specificity protein kinase, catalytic domain;Leucine-rich repeat;Protein kinase, catalytic domain;Concanavalin A-like lectin/glucanase, subgroup	AT2G02220.1	ATPSKR1,PSKR1	phytosulfokin receptor 1	LOC_Os02g02490.1	phytosulfokine receptor precursor, putative, expressed	Zm00001d014996_T001; Zm00001d011834_T001	GRMZM5G854880_T01; GRMZM2G138338_T01	Bradi3g01577.1; Bradi1g33480.1	Sobic.004G012200.1; Sobic.007G098400.1	Seita.1G118600.1; Seita.5G458200.1
Sevir.8G140600	0.09	0.19	0.1	0.11	0.26	0.16	0.04	0.14	0.13	0.01	0.14	0.12	NA		Leucine-rich repeat-containing N-terminal, type 2;Leucine-rich repeat	AT1G71830.1	ATSERK1,SERK1	somatic embryogenesis receptor-like kinase 1	LOC_Os11g31540.1	BRASSINOSTEROID INSENSITIVE 1-associated receptor kinase 1 precursor, putative, expressed	Zm00001d000298_T002; Zm00001d000298_T001	GRMZM2G145440_T01	Bradi4g18280.2	Sobic.005G126200.1; Sobic.005G125950.1	Seita.8G131900.1; Seita.8G131800.1
Sevir.8G260200	0.02	0.11	0.07	0.25	0.25	0.2	0.03	0.07	0.05	0.13	0.17	0.07	NA		Leucine-rich repeat-containing N-terminal, type 2;Leucine-rich repeat, typical subtype;Leucine-rich repeat	AT2G33060.1	AtRLP27,RLP27	receptor like protein 27	LOC_Os01g06730.1	verticillium wilt disease resistance protein, putative, expressed	NA	NA	NA	NA	Seita.8G249600.1
Sevir.5G103400	0.05	0.12	0.11	0.19	0.23	0.17	0.04	0.08	0.02	0.08	0.12	0.01	NA		Protein kinase, ATP binding site;Leucine-rich repeat-containing N-terminal, type 2;Protein kinase-like domain;Serine/threonine-protein kinase, active site;Leucine-rich repeat, typical subtype;Serine/threonine- / dual specificity protein kinase, catalytic domain;Leucine-rich repeat;Protein kinase, catalytic domain;Concanavalin A-like lectin/glucanase, subgroup	AT3G47570.1		Leucine-rich repeat protein kinase family protein	LOC_Os01g05870.1	receptor kinase, putative, expressed	Zm00001d039824_T001; Zm00001d008633_T001	GRMZM2G463580_T01; GRMZM2G421669_T01	NA	Sobic.003G069700.2; Sobic.003G072000.3	Seita.5G106700.1; Seita.5G107000.1
Sevir.6G172700	0.05	0.02	0	0.3	0.21	0.24	0.03	0.04	0	0.14	0.07	0.09	NA	leucine-rich repeat receptor-like protein kinase PEPR1-like	Leucine-rich repeat-containing N-terminal, type 2;Leucine-rich repeat, typical subtype;Leucine-rich repeat	AT1G73066.1		Leucine-rich repeat family protein	LOC_Os08g34640.1	receptor-like protein kinase precursor, putative, expressed	Zm00001d050074_T002; Zm00001d050074_T001	GRMZM2G011806_T01	NA	Sobic.007G144600.1; Sobic.007G144700.2	Seita.6G167100.1; Seita.6G167000.1
Sevir.7G329400	0.18	0	0.31	0.19	0	0.1	0.21	0	0.02	0.22	0	0.21	NA	LRR receptor-like serine/threonine-protein kinase GSO1-like	Leucine-rich repeat-containing N-terminal, type 2;Protein kinase-like domain;Leucine-rich repeat;Serine-threonine/tyrosine-protein kinase catalytic domain;Protein kinase, catalytic domain;Concanavalin A-like lectin/glucanase, subgroup	AT2G45340.1		Leucine-rich repeat protein kinase family protein	LOC_Os01g39600.1	expressed protein	NA	NA	NA	NA	Seita.7G319600.1; Seita.5G259500.1
Sevir.8G111800	0.2	0.11	0.06	0.1	0.1	0.21	0.06	0.03	0.02	0.04	0.04	0.05	NA			AT1G67510.1		Leucine-rich repeat protein kinase family protein	LOC_Os11g19490.1	expressed protein	Zm00001d004635_T002; Zm00001d024047_T001	AC235540.1_FGT002; GRMZM2G012176_T01	Bradi4g20174.1; Bradi4g39617.1	Sobic.001G037400.1	Seita.8G108000.1; Seita.3G090400.1
Sevir.8G129300	0.11	0.11	0.09	0.21	0.11	0.1	0.05	0.02	0.02	0.06	0.04	0.04	NA		Protein kinase, ATP binding site;Leucine-rich repeat-containing N-terminal, type 2;Protein kinase-like domain;Serine/threonine-protein kinase, active site;Leucine-rich repeat, typical subtype;Serine/threonine- / dual specificity protein kinase, catalytic domain;Leucine-rich repeat;Protein kinase, catalytic domain	AT3G47570.1		Leucine-rich repeat protein kinase family protein	LOC_Os11g29790.1	receptor kinase, putative, expressed	NA	NA	NA	Sobic.005G116700.1; Sobic.005G019300.1	Seita.8G122500.1; Seita.9G268400.1
Sevir.8G050700	0.02	0	0	0.52	0.13	0.05	0.03	0	0	0.38	0.18	0.1	NA		Protein kinase, ATP binding site;Protein kinase-like domain;Serine/threonine-protein kinase, active site;Leucine-rich repeat, typical subtype;Serine/threonine- / dual specificity protein kinase, catalytic domain;Leucine-rich repeat;Protein kinase, catalytic domain;Concanavalin A-like lectin/glucanase, subgroup	AT3G47570.1		Leucine-rich repeat protein kinase family protein	LOC_Os01g12790.1	receptor protein kinase, putative, expressed	NA	NA	Bradi4g30827.2; Bradi4g10998.1	Sobic.008G052500.1	Seita.8G049600.1; Seita.8G049800.1
Sevir.9G413600	0.03	0.05	0.13	0.18	0.19	0.14	0.02	0.02	0.06	0.12	0.03	0.03	CLV1	leucine-rich repeat receptor-like kinase protein THICK TASSEL DWARF1-like	Protein kinase-like domain;Serine/threonine-protein kinase, active site;Leucine-rich repeat, typical subtype;Serine/threonine- / dual specificity protein kinase, catalytic domain;Leucine-rich repeat;Protein kinase, catalytic domain	AT1G75820.1	ATCLV1,CLV1,FAS3,FLO5	Leucine-rich receptor-like protein kinase family protein	LOC_Os06g50340.1	receptor protein kinase CLAVATA1 precursor, putative, expressed	Zm00001d014793_T001; Zm00001d028317_T001	GRMZM2G300133_T01; GRMZM2G043584_T01	Bradi1g30160.1; Bradi1g69097.1	Sobic.005G091000.1; Sobic.009G259500.1	Seita.9G409600.1; Seita.4G281800.1
Sevir.3G016900	0.18	0.06	0.14	0.1	0.06	0.16	0.13	0.05	0.1	0.14	0.05	0.08	NA	LRR receptor-like serine/threonine-protein kinase ERECTA-like	Leucine-rich repeat-containing N-terminal, type 2;Leucine-rich repeat, typical subtype;Leucine-rich repeat	AT5G23400.1		Leucine-rich repeat (LRR) family protein	LOC_Os04g58080.1	polygalacturonase inhibitor 3 precursor, putative, expressed	Zm00001d026617_T001	GRMZM2G008583_T01	NA	Sobic.006G266900.1	Seita.3G015900.1
Sevir.7G063600	0.09	0.09	0.09	0.18	0.13	0.09	0.08	0.06	0.05	0.13	0.08	0.07	NA		Leucine-rich repeat-containing N-terminal, type 2;Protein kinase-like domain;Serine/threonine-protein kinase, active site;Leucine-rich repeat, typical subtype;Serine/threonine- / dual specificity protein kinase, catalytic domain;Leucine-rich repeat;Protein kinase, catalytic domain	AT4G20140.1	GSO1	Leucine-rich repeat transmembrane protein kinase	LOC_Os06g38640.1	receptor-like protein kinase precursor, putative, expressed	NA	NA	NA	Sobic.006G030600.2	Seita.7G056300.1
Sevir.1G285100	0.05	0.06	0.08	0.17	0.15	0.14	0.03	0.02	0.07	0.14	0.05	0.07	NA	NA	NA	AT3G47090.1		Leucine-rich repeat protein kinase family protein	LOC_Os02g12400.1	receptor-like protein kinase precursor, putative, expressed	Zm00001d023470_T001	GRMZM5G839644_T01	NA	Sobic.010G228800.1; Sobic.004G047300.1	Seita.1G279700.1
Sevir.3G202200	0.04	0.18	0.16	0.18	0.06	0	0.08	0.31	0.2	0.22	0.13	0	NA	LRR receptor-like serine/threonine-protein kinase GSO1-like		AT5G21090.1		Leucine-rich repeat (LRR) family protein	LOC_Os01g59440.1	BRASSINOSTEROID INSENSITIVE 1-associated receptor kinase 1 precursor, putative, expressed	NA	NA	NA	NA	NA
Sevir.1G083200	0.19	0.09	0.08	0.06	0.05	0.15	0.08	0.05	0.02	0.02	0.03	0.01	NA		Protein kinase, ATP binding site;Leucine-rich repeat-containing N-terminal, type 2;Protein kinase-like domain;Serine/threonine-protein kinase, active site;Leucine-rich repeat, typical subtype;Serine/threonine- / dual specificity protein kinase, catalytic domain;Leucine-rich repeat;Protein kinase, catalytic domain;Concanavalin A-like lectin/glucanase, subgroup	AT1G72300.1		Leucine-rich receptor-like protein kinase family protein	LOC_Os02g05950.1	phytosulfokine receptor precursor, putative, expressed	Zm00001d053867_T001; Zm00001d053866_T001	GRMZM2G451007_T01; GRMZM2G177570_T01	Bradi3g04210.2; Bradi3g04240.1	Sobic.004G044800.1; Sobic.004G044700.1	Seita.1G085400.1; Seita.1G085300.1
Sevir.2G177100	0.03	0.02	0.06	0.12	0.16	0.23	0.05	0.02	0.03	0.1	0.06	0.08	NA		Protein kinase-like domain;Serine/threonine-protein kinase, active site;Serine/threonine- / dual specificity protein kinase, catalytic domain;Leucine-rich repeat;Protein kinase, catalytic domain	AT3G47570.1		Leucine-rich repeat protein kinase family protein	LOC_Os04g15660.1	receptor kinase, putative, expressed	Zm00001d044656_T001; Zm00001d003986_T001	GRMZM2G439799_T01; GRMZM2G125263_T01	Bradi5g04000.3	Sobic.006G030700.3; Sobic.006G030600.2	Seita.2G172100.1; Seita.1G036600.1
Sevir.9G519900	0.09	0.2	0.13	0.08	0.07	0	0.06	0.06	0.06	0.07	0.06	0	NA	probable LRR receptor-like serine/threonine-protein kinase At1g67720-like	Malectin-like carbohydrate-binding domain	AT3G19230.1		Leucine-rich repeat (LRR) family protein	LOC_Os03g08610.1	leucine-rich repeat family protein, putative, expressed	Zm00001d048245_T006; Zm00001d048245_T004	GRMZM2G028643_T01	Bradi1g72337.1; Bradi4g32170.1	Sobic.001G479700.1	Seita.9G515400.1
Sevir.9G301800	0.18	0.07	0.03	0.03	0.06	0.18	0.14	0.03	0.02	0.02	0.04	0.08	NA	serine/threonine-protein kinase BRI1-like 2-like	Protein kinase, ATP binding site;Leucine-rich repeat-containing N-terminal, type 2;Protein kinase-like domain;Serine/threonine-protein kinase, active site;Leucine-rich repeat, typical subtype;Serine/threonine- / dual specificity protein kinase, catalytic domain;Leucine-rich repeat;Protein kinase, catalytic domain;Concanavalin A-like lectin/glucanase, subgroup	AT2G01950.1	BRL2,VH1	BRI1-like 2	LOC_Os10g02500.1	serine/threonine-protein kinase BRI1-like 2 precursor, putative, expressed	Zm00001d000055_T001; Zm00001d019983_T001	GRMZM2G002515_T01; GRMZM2G092604_T01	Bradi3g21400.1	Sobic.001G274400.1; Sobic.008G139600.1	Seita.9G296000.1; Seita.9G429400.1
Sevir.2G265500	0.11	0.11	0.04	0.09	0.03	0.16	0.12	0.04	0.05	0.11	0.05	0.14	NA	polygalacturonase inhibitor 1-like	Leucine-rich repeat-containing N-terminal, type 2;Leucine-rich repeat	AT5G06860.1	ATPGIP1,PGIP1	polygalacturonase inhibiting protein 1	LOC_Os09g31450.1	polygalacturonase inhibitor 1 precursor, putative, expressed	Zm00001d020944_T001	GRMZM2G038051_T01	Bradi4g33790.1	Sobic.002G248300.1	Seita.2G254500.1
Sevir.5G415700	0.13	0.14	0.02	0.05	0.17	0.02	0.1	0.13	0.05	0.11	0.14	0.05	NA	probably inactive leucine-rich repeat receptor-like protein kinase At5g48380-like	Leucine-rich repeat	AT5G48380.1	BIR1	BAK1-interacting receptor-like kinase 1	LOC_Os01g66820.1	inactive receptor kinase At1g27190 precursor, putative, expressed	NA	NA	NA	NA	Seita.6G000200.1; Seita.5G410200.1
Sevir.8G210300	0.14	0.07	0.03	0.15	0.08	0.05	0.06	0.04	0.02	0.05	0.07	0.03	NA		Protein kinase, ATP binding site;Leucine-rich repeat-containing N-terminal, type 2;Protein kinase-like domain;Serine/threonine-protein kinase, active site;Serine/threonine- / dual specificity protein kinase, catalytic domain;Leucine-rich repeat;Protein kinase, catalytic domain;Concanavalin A-like lectin/glucanase, subgroup	AT3G47570.1		Leucine-rich repeat protein kinase family protein	LOC_Os08g24310.1	receptor-like protein kinase precursor, putative, expressed	NA	NA	NA	NA	Seita.8G118900.1; Seita.4G231200.1
Sevir.2G190600	0.14	0.13	0.12	0.01	0.09	0.02	0.05	0.04	0.07	0.03	0.03	0.03	NA	NA	NA	AT1G51850.1		Leucine-rich repeat protein kinase family protein	LOC_Os09g18020.1	senescence-induced receptor-like serine/threonine-protein kinase precursor, putative, expressed	Zm00001d020185_T005; Zm00001d020185_T009	GRMZM5G898887_T01; GRMZM2G354621_T02	Bradi4g28510.3	Sobic.002G178000.1; Sobic.002G177800.2	Seita.2G183300.1; Seita.2G183500.1
Sevir.5G223700	0.03	0.07	0.07	0.14	0.11	0.04	0.02	0.02	0.06	0.05	0.02	0.04	NA		Leucine-rich repeat-containing N-terminal, type 2;Leucine-rich repeat, typical subtype;Leucine-rich repeat	AT2G34930.1		disease resistance family protein / LRR family protein	LOC_Os02g17400.1	leucine rich repeat protein, putative, expressed	NA	NA	NA	Sobic.003G193000.1	Seita.5G217000.1
Sevir.6G201800	0.04	0.02	0.06	0.07	0.17	0.1	0.04	0.03	0.03	0.07	0.07	0.05	NA	probable LRR receptor-like serine/threonine-protein kinase At4g26540-like	Protein kinase, ATP binding site;Leucine-rich repeat-containing N-terminal, type 2;Protein kinase-like domain;Serine/threonine-protein kinase, active site;Leucine-rich repeat, typical subtype;Serine/threonine- / dual specificity protein kinase, catalytic domain;Leucine-rich repeat;Protein kinase, catalytic domain	AT5G56040.2		Leucine-rich receptor-like protein kinase family protein	LOC_Os08g38560.1	receptor-like protein kinase 2 precursor, putative, expressed	Zm00001d052835_T001; Zm00001d020862_T001	GRMZM2G039431_T01; GRMZM2G149051_T01	Bradi3g39150.1; Bradi4g33160.1	Sobic.007G220400.1; Sobic.002G239700.1	Seita.6G194500.1; Seita.2G245500.1
Sevir.3G324500	0.08	0.06	0.06	0.13	0.08	0.04	0.04	0.05	0.02	0.06	0.03	0.02	NA		Protein kinase, ATP binding site;Leucine-rich repeat-containing N-terminal, type 2;Protein kinase-like domain;Serine/threonine-protein kinase, active site;Leucine-rich repeat, typical subtype;Serine/threonine- / dual specificity protein kinase, catalytic domain;Leucine-rich repeat;Protein kinase, catalytic domain;Concanavalin A-like lectin/glucanase, subgroup	AT3G47570.1		Leucine-rich repeat protein kinase family protein	LOC_Os02g13780.1	receptor-like protein kinase 2 precursor, putative, expressed	NA	NA	NA	NA	Seita.3G314300.1
Sevir.5G110600	0.02	0.01	0.04	0.12	0.11	0.14	0.02	0.02	0.02	0.05	0.06	0.1	NA		Leucine-rich repeat-containing N-terminal, type 2;Leucine-rich repeat, typical subtype;Leucine-rich repeat	AT1G45616.1	AtRLP6,RLP6	receptor like protein 6	LOC_Os04g28210.1	verticillium wilt disease resistance protein, putative, expressed	Zm00001d039754_T001	GRMZM2G062576_T01	NA	Sobic.003G059300.1	Seita.5G113900.1
Sevir.1G080900	0.02	0.02	0.05	0.1	0.1	0.13	0.03	0.03	0.05	0.07	0.09	0.12	NA		Leucine-rich repeat-containing N-terminal, type 2;Leucine-rich repeat, typical subtype;Leucine-rich repeat	AT1G17250.1	AtRLP3,RLP3	receptor like protein 3	LOC_Os02g05930.1	phytosulfokine receptor precursor, putative, expressed	NA	NA	NA	Sobic.004G045700.2	Seita.1G082500.1; Seita.1G085600.1
Sevir.6G108700	0.06	0.03	0.05	0.1	0.08	0.08	0.03	0.03	0.05	0.04	0.06	0.05	NA	probable LRR receptor-like serine/threonine-protein kinase At1g34110-like	Leucine-rich repeat-containing N-terminal, type 2;Leucine-rich repeat, typical subtype;Leucine-rich repeat	AT4G08850.1		Leucine-rich repeat receptor-like protein kinase family protein	LOC_Os08g16580.1	Cf2/Cf5 disease resistance protein, putative, expressed	NA	NA	NA	Sobic.007G095600.1	Seita.6G099400.1
Sevir.8G197400	0.04	0.11	0.12	0.04	0.06	0.03	0.05	0.08	0.07	0.06	0.07	0.04	RPK2	LRR receptor-like serine/threonine-protein kinase RPK2-like	Protein kinase, ATP binding site;Leucine-rich repeat-containing N-terminal, type 2;Protein kinase-like domain;Serine/threonine-protein kinase, active site;Leucine-rich repeat, typical subtype;Serine/threonine- / dual specificity protein kinase, catalytic domain;Leucine-rich repeat;Protein kinase, catalytic domain;Concanavalin A-like lectin/glucanase, subgroup	AT3G02130.1	RPK2,TOAD2	receptor-like protein kinase 2	LOC_Os03g54900.2	phytosulfokine receptor precursor, putative, expressed	NA	NA	NA	Sobic.001G085300.1	Seita.9G087600.1
Sevir.8G253000	0.02	0.07	0.06	0.09	0.07	0.07	0.02	0.03	0.05	0.04	0.05	0.03	NA		Protein kinase, ATP binding site;Protein kinase-like domain;Serine/threonine-protein kinase, active site;Leucine-rich repeat, typical subtype;Serine/threonine- / dual specificity protein kinase, catalytic domain;Leucine-rich repeat;Protein kinase, catalytic domain;Concanavalin A-like lectin/glucanase, subgroup	AT3G47570.1		Leucine-rich repeat protein kinase family protein	LOC_Os01g12790.1	receptor protein kinase, putative, expressed	Zm00001d023554_T001; Zm00001d023551_T001	GRMZM5G851140_T01; GRMZM2G406974_T01	Bradi1g44755.1; Bradi1g72572.1	Sobic.008G052500.1; Sobic.008G065200.3	Seita.8G188100.1; Seita.1G000100.1
Sevir.4G243000	0.07	0.07	0.07	0.08	0.05	0.03	0.02	0.02	0.02	0.04	0.03	0.03	NA		Protein kinase, ATP binding site;Leucine-rich repeat-containing N-terminal, type 2;Protein kinase-like domain;Serine/threonine-protein kinase, active site;Leucine-rich repeat, typical subtype;Serine/threonine- / dual specificity protein kinase, catalytic domain;Leucine-rich repeat;Protein kinase, catalytic domain;Concanavalin A-like lectin/glucanase, subgroup	AT3G47570.1		Leucine-rich repeat protein kinase family protein	LOC_Os06g38340.1	receptor-like protein kinase precursor, putative, expressed	Zm00001d009814_T001	GRMZM2G073884_T01	NA	Sobic.009G058900.2	Seita.4G231800.1; Seita.4G231200.1
Sevir.9G252700	0.01	0.06	0.06	0.08	0.13	0.02	0.02	0.05	0.04	0.05	0.08	0.02	NA	probable LRR receptor-like serine/threonine-protein kinase At3g47570-like	Protein kinase, ATP binding site;Leucine-rich repeat-containing N-terminal, type 2;Protein kinase-like domain;Serine/threonine-protein kinase, active site;Leucine-rich repeat, typical subtype;Serine/threonine- / dual specificity protein kinase, catalytic domain;Leucine-rich repeat;Protein kinase, catalytic domain;Concanavalin A-like lectin/glucanase, subgroup	AT5G20480.1	EFR	EF-TU receptor	LOC_Os06g23190.1	receptor-like protein kinase 5 precursor, putative, expressed	NA	NA	NA	NA	Seita.9G250000.1; Seita.8G093700.1
Sevir.4G190200	0.06	0.03	0.04	0.09	0.08	0.05	0.04	0.01	0.04	0.11	0.08	0.04	NA	leucine-rich repeat receptor-like serine/threonine/tyrosine-protein kinase SOBIR1-like	Protein kinase-like domain;Serine/threonine-protein kinase, active site;Serine/threonine- / dual specificity protein kinase, catalytic domain;Protein kinase, catalytic domain	AT2G31880.1	EVR,SOBIR1	Leucine-rich repeat protein kinase family protein	LOC_Os06g18000.1	protein kinase domain containing protein, expressed	Zm00001d045785_T001; Zm00001d017821_T001	GRMZM2G027958_T01; GRMZM2G022514_T01	Bradi1g43417.1	Sobic.010G120800.1	Seita.4G126800.1; Seita.4G126700.1
Sevir.9G264700	0.09	0.04	0.04	0.02	0.06	0.08	0.07	0.05	0.03	0.03	0.03	0.06	NA	LRR receptor-like serine/threonine-protein kinase GSO1-like	Leucine-rich repeat-containing N-terminal, type 2;Leucine-rich repeat, typical subtype;Leucine-rich repeat	AT4G04220.1	AtRLP46,RLP46	receptor like protein 46	LOC_Os08g16580.1	Cf2/Cf5 disease resistance protein, putative, expressed	Zm00001d014181_T001	GRMZM2G466835_T01	NA	Sobic.001G249300.2	Seita.9G261800.1
Sevir.5G316100	0.05	0.03	0.02	0.05	0.11	0.06	0.04	0.03	0.01	0.04	0.02	0.02	NA	leucine-rich repeat receptor-like serine/threonine-protein kinase BAM1-like	Protein kinase, ATP binding site;Leucine-rich repeat-containing N-terminal, type 2;Protein kinase-like domain;Serine/threonine-protein kinase, active site;Leucine-rich repeat, typical subtype;Serine/threonine- / dual specificity protein kinase, catalytic domain;Leucine-rich repeat;Serine-threonine/tyrosine-protein kinase catalytic domain;Protein kinase, catalytic domain	AT5G25930.1		Protein kinase family protein with leucine-rich repeat domain	LOC_Os01g53920.1	receptor-like protein kinase 5 precursor, putative, expressed	Zm00001d043512_T001; Zm00001d012769_T001	GRMZM2G177883_T01; AC233967.1_FGT005	Bradi2g49447.2; Bradi2g62670.2	Sobic.003G291600.1; Sobic.003G291700.1	Seita.5G313300.1; Seita.5G313200.1
Sevir.4G281000	0	0.01	0.01	0.04	0.06	0.19	0	0.01	0.01	0.03	0.03	0.12	NA	putative receptor-like protein kinase At3g47110-like	Protein kinase, ATP binding site;Leucine-rich repeat-containing N-terminal, type 2;Protein kinase-like domain;Serine/threonine-protein kinase, active site;Leucine-rich repeat, typical subtype;Serine/threonine- / dual specificity protein kinase, catalytic domain;Leucine-rich repeat;Serine-threonine/tyrosine-protein kinase catalytic domain;Protein kinase, catalytic domain;Concanavalin A-like lectin…	AT3G47570.1		Leucine-rich repeat protein kinase family protein	LOC_Os06g45630.1	expressed protein	NA	NA	Bradi1g32160.1	Sobic.005G131301.1	Seita.4G268500.1
Sevir.8G047500	0.03	0.02	0.05	0.09	0.09	0.02	0.04	0.04	0.07	0.12	0.06	0.03	NA	leucine-rich repeat receptor protein kinase EXS-like	Protein kinase, ATP binding site;Protein kinase-like domain;Serine/threonine-protein kinase, active site;Serine/threonine- / dual specificity protein kinase, catalytic domain;Protein kinase, catalytic domain;Concanavalin A-like lectin/glucanase, subgroup	AT5G42440.1		Protein kinase superfamily protein	LOC_Os11g06780.1	serine/threonine-protein kinase BRI1-like 1 precursor, putative, expressed	Zm00001d053133_T001	NA	Bradi4g24590.1	Sobic.005G052000.1	Seita.8G046800.1
Sevir.4G235300	0.01	0.02	0.03	0.03	0.11	0.07	0.01	0.04	0.03	0.04	0.16	0.05	NA	receptor-like protein kinase HSL1-like	Protein kinase, ATP binding site;Leucine-rich repeat-containing N-terminal, type 2;Protein kinase-like domain;Serine/threonine-protein kinase, active site;Leucine-rich repeat, typical subtype;Serine/threonine- / dual specificity protein kinase, catalytic domain;Leucine-rich repeat;Serine-threonine/tyrosine-protein kinase catalytic domain;Protein kinase, catalytic domain	AT5G25930.1		Protein kinase family protein with leucine-rich repeat domain	LOC_Os01g53920.1	receptor-like protein kinase 5 precursor, putative, expressed	NA	NA	NA	NA	Seita.4G224100.1; Seita.5G313500.1
Sevir.2G199900	0.05	0.03	0.05	0.01	0.01	0.11	0.02	0.05	0.02	0.02	0.02	0.1	NA	probable inactive receptor kinase At2g26730-like	Protein kinase-like domain;Serine-threonine/tyrosine-protein kinase catalytic domain;Protein kinase, catalytic domain	AT2G26730.1		Leucine-rich repeat protein kinase family protein	LOC_Os09g20970.1	receptor kinase, putative, expressed	Zm00001d020322_T001; Zm00001d011312_T001	GRMZM2G468495_T01; GRMZM2G468502_T01	Bradi4g29330.1; Bradi1g69550.1	Sobic.002G188000.1; Sobic.003G214900.1	Seita.2G192400.1; Seita.2G434300.1
Sevir.3G200200	0.09	0.09	0	0.05	0	0.03	0.08	0.02	0	0.1	0	0.05	NA	somatic embryogenesis receptor kinase 2-like	Leucine-rich repeat-containing N-terminal, type 2;Leucine-rich repeat	AT5G21090.1		Leucine-rich repeat (LRR) family protein	LOC_Os01g59440.1	BRASSINOSTEROID INSENSITIVE 1-associated receptor kinase 1 precursor, putative, expressed	NA	NA	NA	Sobic.009G180400.1	Seita.3G195800.1
Sevir.2G086700	0.02	0.03	0.03	0.07	0.06	0.04	0.02	0.03	0.03	0.05	0.04	0.03	NA		Protein kinase, ATP binding site;Leucine-rich repeat-containing N-terminal, type 2;Protein kinase-like domain;Tyrosine-protein kinase, active site;Leucine-rich repeat, typical subtype;Leucine-rich repeat;Protein kinase, catalytic domain;Concanavalin A-like lectin/glucanase, subgroup	AT4G08850.1		Leucine-rich repeat receptor-like protein kinase family protein	LOC_Os10g02990.1	leucine-rich repeat receptor-like protein kinase 1, putative, expressed	Zm00001d000189_T001; Zm00001d002712_T001	GRMZM2G700905_T01	NA	Sobic.002G077400.1	Seita.2G083400.1
Sevir.6G169700	0.05	0.02	0.05	0.05	0.05	0.03	0.05	0.02	0.05	0.04	0.03	0.02	NA		Leucine-rich repeat-containing N-terminal, type 2;Leucine-rich repeat, typical subtype;Leucine-rich repeat	AT2G33020.1	AtRLP24,RLP24	receptor like protein 24	LOC_Os12g11370.1	verticillium wilt disease resistance protein, putative, expressed	NA	NA	NA	Sobic.007G141700.1; Sobic.007G141900.2	Seita.6G164100.1; Seita.6G164000.1
Sevir.8G234900	0.09	0.05	0.03	0.01	0.03	0.03	0.02	0.04	0.03	0.02	0.02	0.03	NA			AT1G56120.1		Leucine-rich repeat transmembrane protein kinase	LOC_Os12g14699.1	protein kinase domain containing protein, expressed	NA	NA	NA	NA	Seita.8G225300.1
Sevir.4G057100	0	0	0	0.08	0.05	0.1	0.01	0	0.01	0.05	0.04	0.03	NA		Protein kinase, ATP binding site;Leucine-rich repeat-containing N-terminal, type 2;Protein kinase-like domain;Serine/threonine-protein kinase, active site;Leucine-rich repeat, typical subtype;Serine/threonine- / dual specificity protein kinase, catalytic domain;Leucine-rich repeat;Protein kinase, catalytic domain;Concanavalin A-like lectin/glucanase, subgroup	AT3G47570.1		Leucine-rich repeat protein kinase family protein	LOC_Os11g47030.1	receptor protein kinase, putative, expressed	NA	NA	NA	Sobic.010G054400.1	Seita.4G059000.1; Seita.2G122200.1
Sevir.9G155100	0.03	0.02	0	0.07	0.02	0.06	0.06	0.03	0	0.08	0.04	0.08	NA		Protein kinase, ATP binding site;Protein kinase-like domain;Serine/threonine-protein kinase, active site;Serine/threonine- / dual specificity protein kinase, catalytic domain;Serine-threonine/tyrosine-protein kinase catalytic domain;Protein kinase, catalytic domain;Concanavalin A-like lectin/glucanase, subgroup	AT5G53890.1	AtPSKR2,PSKR2	phytosylfokine-alpha receptor 2	LOC_Os01g68870.2	leucine-rich repeat receptor protein kinase EXS precursor, putative, expressed	Zm00001d029012_T002; Zm00001d029012_T003	GRMZM2G023715_T01; GRMZM2G449817_T01	Bradi1g63550.1	Sobic.001G449800.1; Sobic.004G099700.1	Seita.9G156400.1; Seita.9G416500.1
Sevir.5G415400	0.02	0	0	0.02	0	0.15	0.04	0	0	0.05	0	0.12	NA		Leucine-rich repeat-containing N-terminal, type 2	AT5G48380.1	BIR1	BAK1-interacting receptor-like kinase 1	LOC_Os01g66820.1	inactive receptor kinase At1g27190 precursor, putative, expressed	NA	NA	NA	NA	Seita.5G409900.1; Seita.5G410300.1
Sevir.8G194500	0.02	0.02	0.01	0.07	0.03	0.03	0.03	0.02	0.02	0.04	0.02	0.01	NA	NA	NA	AT5G10290.1		leucine-rich repeat transmembrane protein kinase family protein	LOC_Os04g30040.2	jacalin-like lectin domain containing protein, expressed	Zm00001d048877_T002; Zm00001d048877_T004	GRMZM5G867798_T01	Bradi4g15110.3	Sobic.005G182500.2; Sobic.005G182400.1	Seita.8G186100.1; Seita.8G186000.1
Sevir.4G044300	0.01	0.05	0.06	0.03	0.01	0.02	0.02	0.02	0.06	0.03	0.02	0.03	NA	putative leucine-rich repeat receptor-like serine/threonine-protein kinase At2g24130-like	Protein kinase, ATP binding site;Leucine-rich repeat-containing N-terminal, type 2;Protein kinase-like domain;Serine/threonine-protein kinase, active site;Leucine-rich repeat, typical subtype;Serine/threonine- / dual specificity protein kinase, catalytic domain;Leucine-rich repeat;Serine-threonine/tyrosine-protein kinase catalytic domain;Protein kinase, catalytic domain;Concanavalin A-like lectin…	AT2G24130.1		Leucine-rich receptor-like protein kinase family protein	LOC_Os06g08710.1	receptor-like protein kinase precursor, putative, expressed	Zm00001d045086_T001; Zm00001d045088_T001	GRMZM2G428370_T01; GRMZM2G127990_T01	Bradi1g47097.1; Bradi1g47107.1	Sobic.010G067400.1; Sobic.010G067300.1	Seita.4G046400.1; Seita.4G046600.1
Sevir.7G249100	0.13	0	0.03	0	0	0	0.1	0	0.06	0	0	0	NA	probable LRR receptor-like serine/threonine-protein kinase At1g56130-like	Malectin;Protein kinase, ATP binding site;Protein kinase-like domain;Serine/threonine-protein kinase, active site;Serine/threonine- / dual specificity protein kinase, catalytic domain;Protein kinase, catalytic domain;Concanavalin A-like lectin/glucanase, subgroup	AT1G56130.1		Leucine-rich repeat transmembrane protein kinase	LOC_Os04g52590.1	protein kinase domain containing protein, expressed	Zm00001d002309_T001; Zm00001d026306_T005	GRMZM2G384275_T01	NA	Sobic.006G215600.2	Seita.7G237700.1; Seita.7G237800.1
Sevir.7G062800	0	0	0	0.01	0.01	0.13	0	0	0	0.01	0.01	0.07	NA		Leucine-rich repeat-containing N-terminal, type 2;Protein kinase-like domain;Serine/threonine-protein kinase, active site;Leucine-rich repeat, typical subtype;Serine/threonine- / dual specificity protein kinase, catalytic domain;Leucine-rich repeat;Protein kinase, catalytic domain	AT3G47570.1		Leucine-rich repeat protein kinase family protein	LOC_Os04g15630.1	xa21, putative, expressed	NA	NA	Bradi5g03977.1; Bradi5g03980.1	Sobic.006G030600.2; Sobic.006G030400.1	Seita.7G056300.1
Sevir.4G145700	0	0	0.01	0.06	0.03	0.04	0.01	0	0.03	0.02	0.02	0.04	NA		Protein kinase, ATP binding site;Leucine-rich repeat-containing N-terminal, type 2;Protein kinase-like domain;Serine/threonine-protein kinase, active site;Leucine-rich repeat, typical subtype;Serine/threonine- / dual specificity protein kinase, catalytic domain;Leucine-rich repeat;Serine-threonine/tyrosine-protein kinase catalytic domain;Protein kinase, catalytic domain;Concanavalin A-like lectin…	AT3G47570.1; ; AT3G47570.1	; ;	Leucine-rich repeat protein kinase family protein; ; Leucine-rich repeat protein kinase family protein	LOC_Os08g14990.1; LOC_Os08g14960.1; LOC_Os08g14940.1	receptor-like protein kinase 2 precursor, putative, expressed; receptor-like protein kinase precursor, putative, expressed; receptor kinase, putative, expressed	NA	NA	NA	NA	Seita.4G177200.1
Sevir.6G005300	0.01	0	0.02	0.03	0	0.07	0.01	0	0.02	0.04	0	0.1	NA	tyrosine-sulfated glycopeptide receptor 1-like	Leucine-rich repeat-containing N-terminal, type 2;Leucine-rich repeat, typical subtype;Leucine-rich repeat	AT1G72300.1		Leucine-rich receptor-like protein kinase family protein	LOC_Os06g47650.1	phytosulfokine receptor precursor, putative, expressed	Zm00001d014557_T001; Zm00001d036534_T001	GRMZM2G177570_T01; GRMZM2G474777_T01	Bradi1g33510.1	Sobic.010G241500.1	Seita.6G004900.1; Seita.4G251500.1
Sevir.2G190400	0.02	0.01	0.03	0.05	0	0.01	0.03	0.01	0.03	0.04	0	0.02	NA			AT4G29990.1		Leucine-rich repeat transmembrane protein kinase protein	LOC_Os09g19229.1	protein kinase domain containing protein, expressed	Zm00001d020185_T005; Zm00001d020183_T009	GRMZM2G354621_T02; GRMZM5G898887_T01	NA	Sobic.002G177600.1; Sobic.002G178000.1	Seita.2G183100.1; Seita.2G183300.1
Sevir.3G177200	0	0.02	0.02	0.02	0.03	0.03	0	0.03	0.01	0.03	0.04	0.04	NA		Malectin-like carbohydrate-binding domain	AT2G19210.1		Leucine-rich repeat transmembrane protein kinase protein	LOC_Os05g44970.1	senescence-induced receptor-like serine/threonine-protein kinase precursor, putative, expressed	Zm00001d038484_T001	AC214817.3_FGT007	NA	Sobic.009G204300.1; Sobic.009G204900.1	Seita.3G172700.1; Seita.3G172800.1
Sevir.6G212900	0.08	0.04	0	0	0	0	0.1	0.04	0	0	0	0	NA	polygalacturonase inhibitor 1-like	Leucine-rich repeat-containing N-terminal, type 2;Leucine-rich repeat	AT3G12145.1	FLOR1,FLR1	Leucine-rich repeat (LRR) family protein	LOC_Os09g31450.1	polygalacturonase inhibitor 1 precursor, putative, expressed	NA	NA	NA	NA	Seita.6G205700.1
Sevir.5G102700	0.01	0	0	0.06	0.02	0.02	0.03	0	0	0.11	0.04	0.04	NA		Protein kinase-like domain;Serine/threonine-protein kinase, active site;Serine/threonine- / dual specificity protein kinase, catalytic domain;Protein kinase, catalytic domain;Concanavalin A-like lectin/glucanase, subgroup	AT3G47570.1		Leucine-rich repeat protein kinase family protein	LOC_Os01g05870.1	receptor kinase, putative, expressed	NA	NA	NA	Sobic.003G069700.2; Sobic.003G072000.3	Seita.5G105600.1; Seita.5G105100.1
Sevir.4G044500	0.02	0	0.03	0.02	0.02	0.01	0.02	0	0.03	0.02	0.03	0.03	NA	putative leucine-rich repeat receptor-like serine/threonine-protein kinase At2g24130-like	Protein kinase, ATP binding site;Protein kinase-like domain;Serine/threonine-protein kinase, active site;Leucine-rich repeat, typical subtype;Serine/threonine- / dual specificity protein kinase, catalytic domain;Leucine-rich repeat;Protein kinase, catalytic domain;Concanavalin A-like lectin/glucanase, subgroup	AT2G24130.1		Leucine-rich receptor-like protein kinase family protein	LOC_Os06g08710.1	receptor-like protein kinase precursor, putative, expressed	Zm00001d037080_T001; Zm00001d020533_T001	GRMZM2G012685_T01; GRMZM2G084248_T01	Bradi1g47107.1	Sobic.010G067200.2; Sobic.002G205900.1	Seita.4G046600.1; Seita.4G046400.1
Sevir.8G118400	0	0	0.03	0	0.05	0.02	0	0	0.06	0	0.05	0.04	NA	probable leucine-rich repeat receptor-like protein kinase At5g49770-like	Protein kinase-like domain;Serine/threonine-protein kinase, active site;Serine/threonine- / dual specificity protein kinase, catalytic domain;Protein kinase, catalytic domain;Concanavalin A-like lectin/glucanase, subgroup	AT1G79620.1		Leucine-rich repeat protein kinase family protein	LOC_Os11g26140.1	cysteine-rich receptor-like protein kinase 4 precursor, putative, expressed	NA	GRMZM2G506635_T01	NA	Sobic.008G005400.1; Sobic.005G005000.2	Seita.8G112800.1
Sevir.3G065700	0.04	0.02	0	0.02	0.01	0.01	0.03	0.01	0	0.02	0.01	0.01	NA		Leucine-rich repeat-containing N-terminal, type 2;Leucine-rich repeat, typical subtype;Leucine-rich repeat	AT2G34930.1		disease resistance family protein / LRR family protein	LOC_Os01g41770.1	leucine rich repeat protein, putative, expressed	NA	NA	Bradi2g42890.1	Sobic.009G012900.1	Seita.8G237800.1; Seita.3G064800.1
Sevir.5G222700	0.05	0	0.01	0.02	0.01	0.01	0.04	0	0.01	0.05	0.02	0.01	NA	probable leucine-rich repeat receptor-like protein kinase At5g63930-like	Leucine-rich repeat-containing N-terminal, type 2;Leucine-rich repeat, typical subtype;Leucine-rich repeat	AT2G34930.1		disease resistance family protein / LRR family protein	LOC_Os01g41780.1	expressed protein	NA	NA	NA	Sobic.003G210601.1; Sobic.008G018700.1	Seita.5G216100.1
Sevir.8G050800	0	0	0	0.04	0.05	0.01	0	0	0	0.03	0.07	0.02	NA		Protein kinase, ATP binding site;Protein kinase-like domain;Serine/threonine-protein kinase, active site;Leucine-rich repeat, typical subtype;Serine/threonine- / dual specificity protein kinase, catalytic domain;Leucine-rich repeat;Serine-threonine/tyrosine-protein kinase catalytic domain;Protein kinase, catalytic domain;Concanavalin A-like lectin/glucanase, subgroup	AT3G47570.1		Leucine-rich repeat protein kinase family protein	LOC_Os01g12790.1	receptor protein kinase, putative, expressed	NA	NA	Bradi1g01442.2; Bradi4g10998.1	NA	Seita.8G049800.1; Seita.8G049600.1
Sevir.8G171900	0.05	0	0.04	0	0	0	0.04	0	0.03	0	0	0	NA	putative receptor-like protein kinase At3g47110-like	Protein kinase, ATP binding site;Leucine-rich repeat-containing N-terminal, type 2;Protein kinase-like domain;Serine/threonine-protein kinase, active site;Leucine-rich repeat, typical subtype;Serine/threonine- / dual specificity protein kinase, catalytic domain;Leucine-rich repeat;Protein kinase, catalytic domain;Concanavalin A-like lectin/glucanase, subgroup	AT3G47570.1		Leucine-rich repeat protein kinase family protein	LOC_Os11g41100.1	expressed protein	NA	NA	Bradi4g12990.1	Sobic.005G205100.1; Sobic.005G205300.1	Seita.6G130400.1; Seita.8G160700.1
Sevir.1G239000	0.04	0.01	0.01	0.01	0	0.01	0.04	0.01	0.01	0.02	0	0.01	NA		Protein kinase, ATP binding site;Leucine-rich repeat-containing N-terminal, type 2;Protein kinase-like domain;Leucine-rich repeat, typical subtype;Serine/threonine- / dual specificity protein kinase, catalytic domain;Leucine-rich repeat;Protein kinase, catalytic domain;Concanavalin A-like lectin/glucanase, subgroup	AT3G47570.1		Leucine-rich repeat protein kinase family protein	LOC_Os02g40240.2	receptor kinase, putative, expressed	Zm00001d051085_T001; Zm00001d051099_T001	GRMZM2G071396_T01; GRMZM2G702599_T02	NA	Sobic.004G214900.1	Seita.1G233400.1; Seita.1G233100.1
Sevir.3G176500	0.05	0	0.02	0	0	0.01	0.08	0	0.02	0	0	0.01	NA			AT2G19210.1		Leucine-rich repeat transmembrane protein kinase protein	LOC_Os05g44930.1	receptor-like protein kinase, putative, expressed	Zm00001d045184_T001; Zm00001d014243_T002	GRMZM2G110968_T01; GRMZM2G177535_T01	Bradi2g38910.1; Bradi2g38938.1	Sobic.009G204900.1; Sobic.009G204300.1	Seita.3G172200.1; Seita.3G172300.1
Sevir.5G341100	0.02	0.03	0	0.01	0.02	0	0.02	0.02	0	0.02	0.02	0	NA		Protein kinase, ATP binding site;Leucine-rich repeat-containing N-terminal, type 2;Protein kinase-like domain;Tyrosine-protein kinase, active site;Leucine-rich repeat, typical subtype;Leucine-rich repeat;Protein kinase, catalytic domain;Concanavalin A-like lectin/glucanase, subgroup	AT4G08850.1		Leucine-rich repeat receptor-like protein kinase family protein	LOC_Os10g02990.1	leucine-rich repeat receptor-like protein kinase 1, putative, expressed	NA	NA	NA	Sobic.005G214150.1	Seita.5G336900.1; Seita.2G083400.1
Sevir.5G102900	0	0.02	0	0	0	0.05	0	0.03	0	0	0	0.1	NA		Protein kinase-like domain;Serine/threonine-protein kinase, active site;Serine/threonine- / dual specificity protein kinase, catalytic domain;Protein kinase, catalytic domain;Concanavalin A-like lectin/glucanase, subgroup	AT3G47570.1		Leucine-rich repeat protein kinase family protein	LOC_Os01g05870.1	receptor kinase, putative, expressed	NA	NA	NA	Sobic.003G069700.2; Sobic.003G067600.1	Seita.5G105600.1; Seita.5G105100.1
Sevir.6G159200	0	0	0.05	0	0.01	0.01	0	0	0.04	0	0.03	0.02	NA	probable inactive receptor kinase At1g48480-like	Protein kinase, ATP binding site;Leucine-rich repeat-containing N-terminal, type 2;Protein kinase-like domain;Leucine-rich repeat;Protein kinase, catalytic domain	AT1G48480.1	RKL1	receptor-like kinase 1	LOC_Os08g33090.1	inactive receptor kinase At2g26730 precursor, putative, expressed	Zm00001d050355_T001; Zm00001d032244_T001	GRMZM2G040263_T01; GRMZM2G395348_T01	Bradi3g36290.1; Bradi4g29790.1	Sobic.007G132300.1; Sobic.003G083500.1	Seita.6G153100.1; Seita.2G199400.1
Sevir.3G104600	0	0	0.01	0.02	0.03	0.01	0	0	0.02	0.02	0.04	0.01	NA	putative disease resistance RPP13-like protein 3-like	Leucine-rich repeat, typical subtype;NB-ARC	AT1G58848.1; AT1G59218.2; AT1G58848.2	; ;	Disease resistance protein (CC-NBS-LRR class) family; Disease resistance protein (CC-NBS-LRR class) family; Disease resistance protein (CC-NBS-LRR class) family	LOC_Os11g46200.1; LOC_Os11g46200.1; LOC_Os11g46200.1	Leucine Rich Repeat family protein, expressed; Leucine Rich Repeat family protein, expressed; Leucine Rich Repeat family protein, expressed	NA	NA	NA	NA	Seita.8G238800.1; Seita.8G136800.1
Sevir.3G414800	0.02	0	0.01	0.01	0.02	0.01	0.02	0	0.02	0.01	0.03	0.01	NA	putative receptor-like protein kinase At3g47110-like	Protein kinase, ATP binding site;Leucine-rich repeat-containing N-terminal, type 2;Protein kinase-like domain;Serine/threonine-protein kinase, active site;Leucine-rich repeat, typical subtype;Serine/threonine- / dual specificity protein kinase, catalytic domain;Leucine-rich repeat;Protein kinase, catalytic domain;Concanavalin A-like lectin/glucanase, subgroup	AT3G47570.1		Leucine-rich repeat protein kinase family protein	LOC_Os11g07060.5	receptor protein kinase CLAVATA1 precursor, putative, expressed	NA	NA	NA	Sobic.005G057700.1	Seita.3G396700.1
Sevir.5G316200	0	0.01	0.01	0.02	0.01	0.01	0.01	0.01	0.01	0.02	0.01	0.01	NA	receptor-like protein kinase HSL1-like	Protein kinase, ATP binding site;Leucine-rich repeat-containing N-terminal, type 2;Protein kinase-like domain;Serine/threonine-protein kinase, active site;Leucine-rich repeat, typical subtype;Serine/threonine- / dual specificity protein kinase, catalytic domain;Leucine-rich repeat;Serine-threonine/tyrosine-protein kinase catalytic domain;Protein kinase, catalytic domain	AT5G25930.1		Protein kinase family protein with leucine-rich repeat domain	LOC_Os01g53920.1	receptor-like protein kinase 5 precursor, putative, expressed	Zm00001d043512_T001; Zm00001d012769_T001	GRMZM2G177883_T01; AC233967.1_FGT005	Bradi2g49447.2; Bradi2g46180.1	Sobic.003G291600.1; Sobic.003G291700.1	Seita.5G313400.1; Seita.5G313200.1
Sevir.9G546800	0.02	0	0.01	0.01	0.01	0.01	0.02	0	0.02	0.01	0.02	0.01	NA	leucine-rich repeat receptor-like protein kinase PXL2-like	Protein kinase, ATP binding site;Leucine-rich repeat-containing N-terminal, type 2;Protein kinase-like domain;Serine/threonine-protein kinase, active site;Leucine-rich repeat, typical subtype;Serine/threonine- / dual specificity protein kinase, catalytic domain;Leucine-rich repeat;Protein kinase, catalytic domain	AT4G28650.1		Leucine-rich repeat transmembrane protein kinase family protein	LOC_Os03g05140.1	receptor-like protein kinase 2 precursor, putative, expressed	Zm00001d027645_T001; Zm00001d048390_T001	GRMZM2G009818_T01; GRMZM2G438840_T01	Bradi1g75430.1; Bradi3g01230.1	Sobic.001G506100.1; Sobic.004G008600.1	Seita.9G542300.1; Seita.1G114700.1
Sevir.1G008700	0.03	0	0.01	0.01	0	0	0.02	0	0.01	0.02	0	0	NA		Protein kinase, ATP binding site;Leucine-rich repeat-containing N-terminal, type 2;Protein kinase-like domain;Serine/threonine-protein kinase, active site;Leucine-rich repeat, typical subtype;Serine/threonine- / dual specificity protein kinase, catalytic domain;Leucine-rich repeat;Protein kinase, catalytic domain;Concanavalin A-like lectin/glucanase, subgroup	AT3G47570.1		Leucine-rich repeat protein kinase family protein	LOC_Os01g12790.1	receptor protein kinase, putative, expressed	Zm00001d023554_T001; Zm00001d008460_T006	GRMZM5G851140_T01; GRMZM2G149277_T01	Bradi1g72572.1; Bradi1g01432.1	Sobic.008G052500.1; Sobic.008G065200.3	Seita.1G000100.1; Seita.8G188100.1
Sevir.1G067900	0.01	0.02	0	0	0.01	0.01	0.02	0.02	0	0	0.02	0.02	NA	probably inactive leucine-rich repeat receptor-like protein kinase At1g50610-like	Leucine-rich repeat-containing N-terminal, type 2;Protein kinase-like domain;Leucine-rich repeat;Protein kinase, catalytic domain	AT4G31250.1		Leucine-rich repeat protein kinase family protein	LOC_Os02g07810.1	inactive receptor kinase At2g26730 precursor, putative, expressed	Zm00001d053769_T001; Zm00001d015414_T001	GRMZM2G353659_T01; GRMZM2G447989_T01	Bradi3g05540.1; Bradi2g52121.1	Sobic.004G059200.1; Sobic.010G218600.1	Seita.1G069000.1; Seita.4G187200.1
Sevir.1G171800	0	0	0.05	0	0	0	0	0	0.1	0	0	0	NA		Protein kinase, ATP binding site;Leucine-rich repeat-containing N-terminal, type 2;Protein kinase-like domain;Serine/threonine-protein kinase, active site;Leucine-rich repeat, typical subtype;Serine/threonine- / dual specificity protein kinase, catalytic domain;Leucine-rich repeat;Protein kinase, catalytic domain;Concanavalin A-like lectin/glucanase, subgroup	AT3G47110.1		Leucine-rich repeat protein kinase family protein	LOC_Os11g46980.1	receptor-like protein kinase 2 precursor, putative, expressed	NA	NA	NA	NA	Seita.1G169100.1
Sevir.1G237100	0	0	0	0.02	0.02	0.01	0	0	0	0.03	0.03	0.01	NA	NA	NA	AT5G20480.1	EFR	EF-TU receptor	LOC_Os02g40180.1	receptor-like protein kinase 5 precursor, putative, expressed	NA	NA	NA	NA	NA
Sevir.1G237900	0	0.01	0.01	0.02	0.01	0	0.01	0.01	0.01	0.02	0.01	0.01	NA		Leucine-rich repeat-containing N-terminal, type 2;Leucine-rich repeat, typical subtype;Leucine-rich repeat	AT3G47570.1		Leucine-rich repeat protein kinase family protein	LOC_Os02g40200.1	receptor-like protein kinase precursor, putative, expressed	NA	NA	NA	NA	Seita.1G232700.1; Seita.1G233300.1
Sevir.3G306700	0.02	0	0.02	0	0.01	0	0.02	0	0.02	0	0.03	0	NA	NA	NA	AT2G02220.1	ATPSKR1,PSKR1	phytosulfokin receptor 1	LOC_Os02g02490.1	phytosulfokine receptor precursor, putative, expressed	Zm00001d041846_T001	GRMZM2G340721_T01	NA	Sobic.008G057300.1	Seita.3G304600.1
Sevir.4G263500	0	0.02	0	0.01	0.01	0.01	0.01	0.02	0	0.02	0.01	0.01	NA	tyrosine-sulfated glycopeptide receptor 1-like	Protein kinase, ATP binding site;Leucine-rich repeat-containing N-terminal, type 2;Protein kinase-like domain;Serine/threonine-protein kinase, active site;Leucine-rich repeat, typical subtype;Serine/threonine- / dual specificity protein kinase, catalytic domain;Leucine-rich repeat;Protein kinase, catalytic domain;Concanavalin A-like lectin/glucanase, subgroup	AT1G72300.1		Leucine-rich receptor-like protein kinase family protein	LOC_Os06g47750.1	phytosulfokine receptor precursor, putative, expressed	Zm00001d014555_T001; Zm00001d001877_T001	GRMZM2G177535_T01; GRMZM2G452142_T01	Bradi1g33480.1; Bradi4g00900.1	Sobic.010G241900.1; Sobic.002G308200.1	Seita.4G251200.1; Seita.2G320400.1
Sevir.5G103600	0	0	0.01	0.02	0.02	0	0	0	0.02	0.03	0.03	0	NA	probable LRR receptor-like serine/threonine-protein kinase At3g47570-like	Protein kinase, ATP binding site;Leucine-rich repeat-containing N-terminal, type 2;Protein kinase-like domain;Serine/threonine-protein kinase, active site;Leucine-rich repeat, typical subtype;Serine/threonine- / dual specificity protein kinase, catalytic domain;Leucine-rich repeat;Protein kinase, catalytic domain;Concanavalin A-like lectin/glucanase, subgroup	AT3G47570.1		Leucine-rich repeat protein kinase family protein	LOC_Os01g05960.1	receptor kinase, putative, expressed	Zm00001d039822_T001; Zm00001d039824_T001	GRMZM2G463574_T01; GRMZM2G463580_T01	Bradi1g47990.1	Sobic.003G067600.1; Sobic.003G068200.3	Seita.5G106900.1; Seita.5G106800.1
Sevir.1G082100	0	0	0	0	0	0.04	0	0	0	0	0	0.08	NA		Leucine-rich repeat, typical subtype;Leucine-rich repeat	AT1G72300.1		Leucine-rich receptor-like protein kinase family protein	LOC_Os02g05920.1	phytosulfokine receptor precursor, putative, expressed	NA	NA	Bradi3g04227.1	NA	Seita.1G083900.1; Seita.1G085400.1
Sevir.3G176600	0.02	0	0	0	0.01	0.01	0.02	0	0	0	0.02	0.02	NA			AT2G19210.1		Leucine-rich repeat transmembrane protein kinase protein	LOC_Os05g44930.1	receptor-like protein kinase, putative, expressed	Zm00001d038485_T001; Zm00001d011779_T015	GRMZM2G701201_T02; GRMZM2G168416_T01	Bradi2g19297.2; Bradi2g38910.1	Sobic.009G204900.1; Sobic.009G204300.1	Seita.3G172300.1; Seita.3G172200.1
Sevir.3G390800	0.01	0.01	0	0.01	0	0.01	0.02	0.01	0.01	0.01	0	0.01	NA		Leucine-rich repeat-containing N-terminal, type 2;Leucine-rich repeat, typical subtype;Leucine-rich repeat	AT1G74190.1	AtRLP15,RLP15	receptor like protein 15	LOC_Os04g55440.1	Cf-4A protein, putative, expressed	NA	NA	NA	NA	Seita.3G373800.1
Sevir.5G415600	0	0	0	0	0	0.04	0	0	0	0	0	0.07	NA		Leucine-rich repeat-containing N-terminal, type 2	AT5G48380.1	BIR1	BAK1-interacting receptor-like kinase 1	LOC_Os05g34270.1	inactive receptor kinase At1g27190 precursor, putative, expressed	NA	NA	NA	NA	Seita.5G410100.1; Seita.5G410000.1
Sevir.9G284100	0.04	0	0	0	0	0	0.05	0	0	0	0	0	CLV1	leucine-rich repeat receptor-like kinase protein FLORAL ORGAN NUMBER1-like	Leucine-rich repeat-containing N-terminal, type 2;Leucine-rich repeat, typical subtype;Leucine-rich repeat	AT1G75820.1	ATCLV1,CLV1,FAS3,FLO5	Leucine-rich receptor-like protein kinase family protein	LOC_Os06g50340.1	receptor protein kinase CLAVATA1 precursor, putative, expressed	Zm00001d042051_T001; Zm00001d042051_T002	GRMZM2G138338_T01	NA	Sobic.010G267700.1; Sobic.003G432000.1	Seita.9G281300.1; Seita.4G281800.1
Sevir.1G082800	0.01	0	0	0	0.02	0	0.02	0	0	0	0.04	0	NA		Leucine-rich repeat-containing N-terminal, type 2;Leucine-rich repeat, typical subtype;Leucine-rich repeat	AT1G17240.1	AtRLP2,RLP2	receptor like protein 2	LOC_Os02g05920.1	phytosulfokine receptor precursor, putative, expressed	NA	GRMZM2G410963_T01	Bradi1g33510.1	Sobic.004G045100.1; Sobic.005G110532.1	Seita.1G084600.1; Seita.1G084700.1
Sevir.1G237000	0	0	0	0.02	0.01	0	0	0	0	0.03	0.02	0	NA		Leucine-rich repeat-containing N-terminal, type 2;Protein kinase-like domain;Serine/threonine-protein kinase, active site;Protein kinase, catalytic domain	AT3G47570.1		Leucine-rich repeat protein kinase family protein	LOC_Os02g40180.1	receptor-like protein kinase 5 precursor, putative, expressed	Zm00001d051093_T001; Zm00001d051096_T001	GRMZM2G040508_T01; GRMZM2G702599_T02	NA	NA	Seita.1G232700.1; Seita.1G233100.1
Sevir.2G083000	0	0	0	0.03	0	0	0	0	0	0.04	0	0	NA		Protein kinase, ATP binding site;Leucine-rich repeat-containing N-terminal, type 2;Protein kinase-like domain;Serine/threonine-protein kinase, active site;Leucine-rich repeat, typical subtype;Serine/threonine- / dual specificity protein kinase, catalytic domain;Leucine-rich repeat;Protein kinase, catalytic domain	AT3G47570.1		Leucine-rich repeat protein kinase family protein	LOC_Os01g05940.1	receptor kinase, putative, expressed	NA	NA	NA	Sobic.002G075400.2; Sobic.002G075700.1	Seita.2G080400.1; Seita.2G080800.1
Sevir.2G207700	0.01	0	0	0	0.01	0.01	0.02	0	0	0	0.02	0.01	NA		Leucine-rich repeat-containing N-terminal, type 2;Protein kinase-like domain;Protein kinase, catalytic domain;Concanavalin A-like lectin/glucanase, subgroup	AT1G48480.1	RKL1	receptor-like kinase 1	LOC_Os09g23570.1	inactive receptor kinase At2g26730 precursor, putative, expressed	Zm00001d020403_T001; Zm00001d050355_T001	GRMZM2G153527_T01; GRMZM2G040263_T01	Bradi4g29790.1; Bradi3g36290.1	Sobic.002G195800.3; Sobic.007G132300.1	Seita.2G199400.1; Seita.2G199500.1
Sevir.5G128100	0.01	0	0	0.01	0.01	0	0.01	0	0	0.01	0.02	0	NA			AT4G29990.1		Leucine-rich repeat transmembrane protein kinase protein	LOC_Os12g37980.1	protein kinase domain containing protein, expressed	Zm00001d041574_T001	GRMZM2G332280_T01	Bradi4g04109.1; Bradi4g04077.1	Sobic.008G134300.1	Seita.5G130300.1; Seita.3G331000.1
Sevir.9G167000	0	0	0.01	0.02	0	0	0	0	0.02	0.03	0	0	NA	NA	NA	AT4G04220.1	AtRLP46,RLP46	receptor like protein 46	LOC_Os10g33130.1	leucine-rich repeat receptor protein kinase EXS precursor, putative, expressed	NA	NA	NA	NA	Seita.9G168900.1
Sevir.1G114100	0	0	0.01	0.01	0	0	0.01	0	0.01	0.01	0.01	0.01	NA	leucine-rich repeat receptor-like protein kinase PXL2-like	Protein kinase, ATP binding site;Leucine-rich repeat-containing N-terminal, type 2;Protein kinase-like domain;Serine/threonine-protein kinase, active site;Leucine-rich repeat, typical subtype;Serine/threonine- / dual specificity protein kinase, catalytic domain;Leucine-rich repeat;Protein kinase, catalytic domain	AT4G28650.1		Leucine-rich repeat transmembrane protein kinase family protein	LOC_Os02g02140.1	receptor protein kinase CLAVATA1 precursor, putative, expressed	Zm00001d014971_T001; Zm00001d048390_T001	GRMZM2G168603_T01; GRMZM2G438840_T01	Bradi3g01230.1; Bradi1g69097.1	Sobic.004G008600.1; Sobic.001G506100.1	Seita.1G114700.1; Seita.9G542300.1
Sevir.1G237200	0	0	0	0	0.02	0	0	0	0	0	0.04	0	NA	NA	NA	AT5G07280.1	EMS1,EXS	Leucine-rich repeat transmembrane protein kinase	LOC_Os02g40200.1	receptor-like protein kinase precursor, putative, expressed	NA	NA	NA	NA	NA
Sevir.3G097100	0	0	0	0.01	0	0.01	0	0	0.01	0.02	0	0.01	NA	probable leucine-rich repeat receptor-like protein kinase At5g49770-like	Protein kinase, ATP binding site;Protein kinase-like domain;Serine/threonine-protein kinase, active site;Serine/threonine- / dual specificity protein kinase, catalytic domain;Serine-threonine/tyrosine-protein kinase catalytic domain;Protein kinase, catalytic domain;Concanavalin A-like lectin/glucanase, subgroup	AT1G79620.1		Leucine-rich repeat protein kinase family protein	LOC_Os12g10740.1	leucine-rich repeat family protein, putative, expressed	Zm00001d041773_T001; Zm00001d041773_T002	GRMZM2G429714_T02; GRMZM2G322438_T01	Bradi4g40160.4; Bradi2g21990.1	Sobic.008G074500.1; Sobic.009G177400.1	Seita.3G096800.1; Seita.3G200200.1
Sevir.3G176400	0.01	0	0.01	0	0	0	0.01	0	0.01	0	0	0	NA			AT4G29990.1		Leucine-rich repeat transmembrane protein kinase protein	LOC_Os05g44930.1	receptor-like protein kinase, putative, expressed	Zm00001d041236_T001; Zm00001d034495_T001	GRMZM2G391794_T01; GRMZM2G049906_T01	Bradi2g19297.2; Bradi2g58084.1	Sobic.009G204700.1; Sobic.009G204900.1	Seita.3G172100.1; Seita.3G172200.1
Sevir.4G037000	0	0	0	0	0	0.02	0	0	0	0	0	0.04	NA	probable inactive leucine-rich repeat receptor-like protein kinase At5g20690-like	Leucine-rich repeat-containing N-terminal, type 2;Protein kinase-like domain;Leucine-rich repeat, typical subtype;Leucine-rich repeat;Protein kinase, catalytic domain	AT3G42880.1		Leucine-rich repeat protein kinase family protein	LOC_Os06g09860.1	expressed protein	Zm00001d045013_T001	GRMZM2G061257_T01	Bradi1g46570.1; Bradi4g29930.1	Sobic.010G074000.1	Seita.4G039100.1
Sevir.5G315800	0	0	0.02	0	0	0	0	0	0.03	0	0	0	NA		Protein kinase, ATP binding site;Protein kinase-like domain;Serine/threonine-protein kinase, active site;Leucine-rich repeat, typical subtype;Serine/threonine- / dual specificity protein kinase, catalytic domain;Leucine-rich repeat;Serine-threonine/tyrosine-protein kinase catalytic domain;Protein kinase, catalytic domain	AT5G25930.1		Protein kinase family protein with leucine-rich repeat domain	LOC_Os05g44770.1	receptor-like protein kinase 5 precursor, putative, expressed	Zm00001d043512_T001; Zm00001d012717_T001	GRMZM2G177883_T01; AC233967.1_FGT005	Bradi2g49447.2; Bradi2g62670.2	Sobic.003G291600.1; Sobic.003G291700.1	Seita.5G313100.1; Seita.J022300.1
Sevir.6G056100	0.02	0	0	0	0	0	0.03	0	0	0	0	0	NA	NA	NA	AT5G25930.1		Protein kinase family protein with leucine-rich repeat domain	LOC_Os01g53920.1	receptor-like protein kinase 5 precursor, putative, expressed	NA	NA	NA	NA	NA
Sevir.6G070500	0	0	0	0.02	0	0	0	0	0	0.04	0	0	NA	probable LRR receptor-like serine/threonine-protein kinase At4g36180-like	Leucine-rich repeat, typical subtype;Leucine-rich repeat	AT2G33060.1	AtRLP27,RLP27	receptor like protein 27	LOC_Os01g04070.1	verticillium wilt disease resistance protein, putative, expressed	Zm00001d024693_T001	NA	NA	Sobic.007G033100.2; Sobic.007G032600.1	Seita.6G072100.1; Seita.6G071200.1
Sevir.8G056300	0	0	0.01	0	0.01	0	0	0	0.01	0	0.02	0	NA	probable LRR receptor-like serine/threonine-protein kinase At4g36180-like	Leucine-rich repeat-containing N-terminal, type 2;Leucine-rich repeat, typical subtype;Leucine-rich repeat	AT2G34930.1		disease resistance family protein / LRR family protein	LOC_Os01g41770.1	leucine rich repeat protein, putative, expressed	NA	NA	NA	Sobic.005G060900.2	Seita.8G055600.1; Seita.8G069600.1
Sevir.8G056400	0.01	0	0	0	0	0.01	0.02	0	0	0	0	0.02	NA	probable leucine-rich repeat receptor-like protein kinase At5g63930-like	Leucine-rich repeat-containing N-terminal, type 2;Leucine-rich repeat, typical subtype;Leucine-rich repeat	AT4G13920.1	AtRLP50,RLP50	receptor like protein 50	LOC_Os01g41770.1	leucine rich repeat protein, putative, expressed	NA	NA	NA	Sobic.005G060900.2	Seita.8G055600.1; Seita.8G055500.1
Sevir.8G125400	0.01	0.01	0	0	0	0	0.01	0.01	0.01	0	0	0	NA		Protein kinase, ATP binding site;Leucine-rich repeat-containing N-terminal, type 2;Protein kinase-like domain;Serine/threonine-protein kinase, active site;Serine/threonine- / dual specificity protein kinase, catalytic domain;Leucine-rich repeat;Protein kinase, catalytic domain;Concanavalin A-like lectin/glucanase, subgroup	AT3G47570.1		Leucine-rich repeat protein kinase family protein	LOC_Os08g24310.1	receptor-like protein kinase precursor, putative, expressed	NA	NA	NA	NA	Seita.8G118900.1; Seita.4G231200.1
Sevir.8G251100	0.01	0	0	0	0	0.01	0.03	0	0	0	0	0.01	NA		Protein kinase, ATP binding site;Leucine-rich repeat-containing N-terminal, type 2;Protein kinase-like domain;Serine/threonine-protein kinase, active site;Leucine-rich repeat, typical subtype;Serine/threonine- / dual specificity protein kinase, catalytic domain;Leucine-rich repeat;Protein kinase, catalytic domain;Concanavalin A-like lectin/glucanase, subgroup	AT5G46330.1	FLS2	Leucine-rich receptor-like protein kinase family protein	LOC_Os11g47030.1	receptor protein kinase, putative, expressed	NA	NA	NA	NA	Seita.1G000100.1; Seita.8G022800.1
Sevir.9G226800	0	0.01	0	0	0.01	0	0	0.01	0.01	0	0.01	0	NA	probable LRR receptor-like serine/threonine-protein kinase At4g08850-like	Protein kinase, ATP binding site;Leucine-rich repeat-containing N-terminal, type 2;Protein kinase-like domain;Tyrosine-protein kinase, active site;Leucine-rich repeat, typical subtype;Leucine-rich repeat;Protein kinase, catalytic domain;Concanavalin A-like lectin/glucanase, subgroup	AT4G08850.1		Leucine-rich repeat receptor-like protein kinase family protein	LOC_Os10g32990.1	receptor-like protein kinase 2 precursor, putative, expressed	Zm00001d032747_T001; Zm00001d032746_T001	GRMZM2G001845_T01; GRMZM2G302990_T01	Bradi3g28367.1; Bradi4g00877.1	Sobic.008G186400.1; Sobic.010G120800.1	Seita.9G227200.1; Seita.2G245500.1
Sevir.1G040500	0	0	0	0	0	0.01	0	0	0	0	0	0.01	NA		Protein kinase, ATP binding site;Leucine-rich repeat-containing N-terminal, type 2;Protein kinase-like domain;Leucine-rich repeat, typical subtype;Serine/threonine- / dual specificity protein kinase, catalytic domain;Leucine-rich repeat;Protein kinase, catalytic domain;Concanavalin A-like lectin/glucanase, subgroup	AT3G47570.1		Leucine-rich repeat protein kinase family protein	LOC_Os07g03000.1	receptor-like protein kinase precursor, putative, expressed	NA	NA	Bradi5g15027.2	Sobic.005G038800.2	Seita.1G041400.1; Seita.1G233400.1
Sevir.1G081000	0.01	0	0	0	0	0	0.01	0	0	0	0	0	NA		Leucine-rich repeat-containing N-terminal, type 2;Leucine-rich repeat, typical subtype;Leucine-rich repeat	AT1G17240.1	AtRLP2,RLP2	receptor like protein 2	LOC_Os02g06030.1	phytosulfokine receptor precursor, putative, expressed	Zm00001d015298_T001; Zm00001d053867_T001	GRMZM2G104425_T01; GRMZM2G451007_T01	Bradi3g04187.1; Bradi3g04176.1	Sobic.004G045700.2; Sobic.004G044500.1	Seita.1G082600.1; Seita.1G082400.1
Sevir.1G082000	0	0.01	0	0	0	0	0	0.02	0	0	0	0	NA		Leucine-rich repeat, typical subtype;Leucine-rich repeat	AT1G17240.1	AtRLP2,RLP2	receptor like protein 2	LOC_Os02g06190.1	phytosulfokine receptor precursor, putative, expressed	NA	NA	Bradi3g04176.1; Bradi3g04321.1	Sobic.004G045200.1	Seita.1G083900.1; Seita.1G085700.1
Sevir.1G082900	0	0	0	0	0	0.01	0	0	0	0	0	0.03	NA		Leucine-rich repeat, typical subtype;Leucine-rich repeat	AT1G72300.1		Leucine-rich receptor-like protein kinase family protein	LOC_Os02g06070.1	phytosulfokine receptor precursor, putative, expressed	NA	GRMZM2G410963_T01	NA	Sobic.005G156400.1; Sobic.004G045100.1	Seita.1G084600.1; Seita.1G084700.1
Sevir.1G119200	0	0.01	0	0	0	0	0	0.02	0	0	0	0	BAM1		Protein kinase, ATP binding site;Protein kinase-like domain;Serine/threonine-protein kinase, active site;Leucine-rich repeat, typical subtype;Serine/threonine- / dual specificity protein kinase, catalytic domain;Leucine-rich repeat;Serine-threonine/tyrosine-protein kinase catalytic domain;Protein kinase, catalytic domain	AT5G65700.1	BAM1	Leucine-rich receptor-like protein kinase family protein	LOC_Os11g09130.1	receptor-like protein kinase 5 precursor, putative, expressed	NA	NA	NA	Sobic.008G060200.1	Seita.J012100.1; Seita.7G281600.1
Sevir.1G188900	0	0	0	0.01	0	0	0.01	0	0	0.02	0	0	NA	probable LRR receptor-like serine/threonine-protein kinase At3g47570-like	Protein kinase, ATP binding site;Leucine-rich repeat-containing N-terminal, type 2;Protein kinase-like domain;Serine/threonine-protein kinase, active site;Leucine-rich repeat, typical subtype;Serine/threonine- / dual specificity protein kinase, catalytic domain;Leucine-rich repeat;Protein kinase, catalytic domain;Concanavalin A-like lectin/glucanase, subgroup	AT3G47570.1		Leucine-rich repeat protein kinase family protein	LOC_Os01g05870.1	receptor kinase, putative, expressed	Zm00001d039824_T001	GRMZM2G463580_T01	Bradi1g47990.1	Sobic.004G169100.1; Sobic.003G069601.1	Seita.1G185000.1; Seita.5G106900.1
Sevir.2G032000	0	0	0	0	0	0.01	0	0	0	0	0	0.02	NA		Protein kinase-like domain;Serine-threonine/tyrosine-protein kinase catalytic domain;Protein kinase, catalytic domain;Concanavalin A-like lectin/glucanase, subgroup	AT4G08850.1		Leucine-rich repeat receptor-like protein kinase family protein	LOC_Os10g02990.1	leucine-rich repeat receptor-like protein kinase 1, putative, expressed	NA	NA	NA	NA	Seita.2G027200.1
Sevir.2G190800	0.01	0	0	0	0	0	0.01	0	0	0	0	0	NA		Malectin-like carbohydrate-binding domain;Protein kinase-like domain;Serine-threonine/tyrosine-protein kinase catalytic domain	AT4G29990.1		Leucine-rich repeat transmembrane protein kinase protein	LOC_Os09g19229.1	protein kinase domain containing protein, expressed	Zm00001d020185_T005; Zm00001d020183_T009	GRMZM5G898887_T01; GRMZM2G354615_T01	NA	Sobic.002G177800.2; Sobic.002G178000.1	Seita.2G183500.1; Seita.2G183300.1
Sevir.3G334600	0	0.01	0	0	0	0	0.01	0.01	0	0	0	0	NA	LRR receptor-like serine/threonine-protein kinase ERECTA-like	Leucine-rich repeat-containing N-terminal, type 2;Leucine-rich repeat, typical subtype;Leucine-rich repeat	AT1G71400.1	AtRLP12,RLP12	receptor like protein 12	LOC_Os10g33130.1	leucine-rich repeat receptor protein kinase EXS precursor, putative, expressed	NA	NA	NA	NA	Seita.3G321300.1
Sevir.3G344800	0	0	0	0	0.01	0	0	0	0	0	0.01	0	NA			AT4G29990.1		Leucine-rich repeat transmembrane protein kinase protein	LOC_Os12g37980.1	protein kinase domain containing protein, expressed	Zm00001d041574_T001; Zm00001d041573_T001	GRMZM2G332280_T01	Bradi4g04109.1; Bradi4g04077.1	Sobic.008G134300.1; Sobic.008G134500.1	Seita.3G331000.1; Seita.3G330900.1
Sevir.3G406800	0	0.01	0	0	0	0	0	0.02	0	0	0	0	NA	LRR receptor-like serine/threonine-protein kinase EFR-like	Protein kinase, ATP binding site;Leucine-rich repeat-containing N-terminal, type 2;Protein kinase-like domain;Serine/threonine-protein kinase, active site;Leucine-rich repeat, typical subtype;Serine/threonine- / dual specificity protein kinase, catalytic domain;Leucine-rich repeat;Serine-threonine/tyrosine-protein kinase catalytic domain;Protein kinase, catalytic domain;Concanavalin A-like lectin…	AT3G47090.1		Leucine-rich repeat protein kinase family protein	LOC_Os12g42520.1	receptor kinase, putative, expressed	Zm00001d041298_T003; Zm00001d041298_T001	GRMZM2G456669_T01	NA	Sobic.008G174966.1	Seita.3G389700.1; Seita.3G389600.1
Sevir.4G231400	0	0	0	0.01	0	0	0	0	0	0.02	0	0	NA		Protein kinase, ATP binding site;Leucine-rich repeat-containing N-terminal, type 2;Protein kinase-like domain;Serine/threonine-protein kinase, active site;Serine/threonine- / dual specificity protein kinase, catalytic domain;Leucine-rich repeat;Protein kinase, catalytic domain;Concanavalin A-like lectin/glucanase, subgroup	AT3G47570.1; AT3G47570.1	;	Leucine-rich repeat protein kinase family protein; Leucine-rich repeat protein kinase family protein	LOC_Os06g38340.1; LOC_Os06g38830.1	receptor-like protein kinase precursor, putative, expressed; receptor-like protein kinase precursor, putative, expressed	NA	NA	NA	NA	Seita.4G221200.1; Seita.4G231800.1
Sevir.6G126800	0	0	0.01	0	0	0	0	0	0.02	0	0	0	NA	NA	NA	AT3G47110.1		Leucine-rich repeat protein kinase family protein	LOC_Os11g46980.1	receptor-like protein kinase 2 precursor, putative, expressed	Zm00001d030796_T003; Zm00001d030796_T011	GRMZM2G429759_T05; GRMZM2G088490_T01	Bradi1g44755.1; Bradi4g30827.2	Sobic.008G053000.2	Seita.6G117400.1; Seita.6G117500.1
Sevir.6G218200	0.01	0	0	0	0	0	0.01	0	0	0	0	0	NA	probably inactive leucine-rich repeat receptor-like protein kinase At1g50610-like	Leucine-rich repeat-containing N-terminal, type 2;Protein kinase-like domain;Protein kinase, catalytic domain	AT1G50610.1		Leucine-rich repeat protein kinase family protein	LOC_Os08g40990.1	receptor-like protein kinase 1, putative, expressed	Zm00001d031509_T003; Zm00001d049750_T002	GRMZM2G151216_T01; GRMZM2G138198_T01	Bradi3g40370.1	Sobic.007G204800.1	Seita.6G210900.1; Seita.1G069000.1
Sevir.7G149600	0	0	0	0	0	0.01	0	0	0	0	0	0.02	NA		Leucine-rich repeat-containing N-terminal, type 2;Leucine-rich repeat, typical subtype;Leucine-rich repeat	AT1G47890.1	AtRLP7,RLP7	receptor like protein 7	LOC_Os04g40440.1	expressed protein	Zm00001d039754_T001	GRMZM2G062576_T01	NA	NA	Seita.7G139100.1
Sevir.8G052600	0	0	0	0	0	0.01	0	0	0	0	0	0.01	NA		Protein kinase, ATP binding site;Leucine-rich repeat-containing N-terminal, type 2;Protein kinase-like domain;Serine/threonine-protein kinase, active site;Leucine-rich repeat, typical subtype;Serine/threonine- / dual specificity protein kinase, catalytic domain;Leucine-rich repeat;Protein kinase, catalytic domain;Concanavalin A-like lectin/glucanase, subgroup	AT3G47570.1		Leucine-rich repeat protein kinase family protein	LOC_Os11g07260.1	expressed protein	NA	NA	Bradi4g24410.3	Sobic.005G065000.1; Sobic.005G057700.1	Seita.8G051800.1; Seita.3G396700.1
Sevir.8G072100	0	0	0	0.01	0	0	0	0	0	0.02	0	0	NA	receptor-like protein kinase HSL1-like	Leucine-rich repeat-containing N-terminal, type 2;Protein kinase-like domain;Serine/threonine-protein kinase, active site;Leucine-rich repeat, typical subtype;Serine/threonine- / dual specificity protein kinase, catalytic domain;Leucine-rich repeat;Protein kinase, catalytic domain	AT1G28440.1	HSL1	HAESA-like 1	LOC_Os09g15700.1	receptor-like protein kinase 5 precursor, putative, expressed	Zm00001d020101_T001	GRMZM2G110685_T01	Bradi4g28107.1	Sobic.002G172200.1; Sobic.002G172100.1	Seita.8G071500.1; Seita.2G177600.1
Sevir.8G095700	0.01	0	0	0	0	0	0.01	0	0.01	0	0	0	NA	probable LRR receptor-like serine/threonine-protein kinase At3g47570-like	Protein kinase, ATP binding site;Leucine-rich repeat-containing N-terminal, type 2;Protein kinase-like domain;Serine/threonine-protein kinase, active site;Leucine-rich repeat, typical subtype;Serine/threonine- / dual specificity protein kinase, catalytic domain;Leucine-rich repeat;Protein kinase, catalytic domain;Concanavalin A-like lectin/glucanase, subgroup	AT3G47570.1		Leucine-rich repeat protein kinase family protein	LOC_Os06g23190.1	receptor-like protein kinase 5 precursor, putative, expressed	NA	NA	NA	NA	Seita.8G093700.1; Seita.9G250000.1
Sevir.8G195600	0	0	0.01	0	0	0	0	0	0.02	0	0	0	NA	probable LRR receptor-like serine/threonine-protein kinase At4g08850-like	Leucine-rich repeat-containing N-terminal, type 2;Leucine-rich repeat, typical subtype;Leucine-rich repeat	AT2G33170.1		Leucine-rich repeat receptor-like protein kinase family protein	LOC_Os02g17710.1	receptor-like protein kinase 5 precursor, putative, expressed	NA	NA	NA	Sobic.004G126100.2	Seita.8G186800.1
Sevir.8G207000	0	0	0	0	0	0.01	0	0	0	0	0	0.02	NA	probable inactive leucine-rich repeat receptor-like protein kinase At5g20690-like	Leucine-rich repeat-containing N-terminal, type 2;Protein kinase-like domain;Leucine-rich repeat;Serine-threonine/tyrosine-protein kinase catalytic domain;Protein kinase, catalytic domain	AT5G20690.1		Leucine-rich repeat protein kinase family protein	LOC_Os11g40550.1	receptor kinase, putative, expressed	Zm00001d048822_T001; Zm00001d014971_T001	GRMZM2G122873_T01; GRMZM2G168603_T01	Bradi4g13300.1; Bradi1g46570.1	Sobic.005G192000.1; Sobic.004G008600.1	Seita.8G199200.1; Seita.6G064400.1
Sevir.8G213100	0	0.01	0	0	0	0	0	0.01	0	0	0	0	NA		Protein kinase, ATP binding site;Protein kinase-like domain;Serine/threonine-protein kinase, active site;Leucine-rich repeat, typical subtype;Serine/threonine- / dual specificity protein kinase, catalytic domain;Leucine-rich repeat;Protein kinase, catalytic domain;Concanavalin A-like lectin/glucanase, subgroup	AT3G47570.1		Leucine-rich repeat protein kinase family protein	LOC_Os11g10310.1	receptor-like protein kinase 2 precursor, putative, expressed	Zm00001d030787_T001	GRMZM2G088490_T01; GRMZM2G406974_T01	Bradi4g30827.2	Sobic.008G065200.3; Sobic.005G220800.1	Seita.8G188100.1; Seita.8G022600.1
Sevir.1G015800	0	0	0	0	0	0	0	0	0	0	0	0	NA	receptor-like protein kinase 5-like	Protein kinase, ATP binding site;Leucine-rich repeat-containing N-terminal, type 2;Protein kinase-like domain;Serine/threonine-protein kinase, active site;Leucine-rich repeat, typical subtype;Serine/threonine- / dual specificity protein kinase, catalytic domain;Leucine-rich repeat;Serine-threonine/tyrosine-protein kinase catalytic domain;Protein kinase, catalytic domain	AT5G25930.1		Protein kinase family protein with leucine-rich repeat domain	LOC_Os02g13430.1	receptor-like protein kinase 5 precursor, putative, expressed	Zm00001d053424_T001; Zm00001d016285_T001	GRMZM2G100234_T01; GRMZM2G176206_T01	Bradi3g08647.1; Bradi3g08660.1	Sobic.004G111200.1; Sobic.004G111400.1	Seita.1G015900.1; Seita.1G028700.1
Sevir.1G050100	0	0	0	0	0	0	0	0	0	0	0	0	NA	leucine-rich repeat receptor protein kinase EXS-like	Protein kinase, ATP binding site;Leucine-rich repeat-containing N-terminal, type 2;Protein kinase-like domain;Serine/threonine-protein kinase, active site;Leucine-rich repeat, typical subtype;Serine/threonine- / dual specificity protein kinase, catalytic domain;Leucine-rich repeat;Protein kinase, catalytic domain;Concanavalin A-like lectin/glucanase, subgroup	AT5G07280.1	EMS1,EXS	Leucine-rich repeat transmembrane protein kinase	LOC_Os01g68870.2	leucine-rich repeat receptor protein kinase EXS precursor, putative, expressed	Zm00001d015853_T001	GRMZM2G306771_T01; GRMZM2G382566_T01	Bradi2g58780.4	Sobic.004G078400.1; Sobic.003G402100.3	Seita.1G050900.1; Seita.1G051000.1
Sevir.1G080800	0	0	0	0	0	0	0	0	0	0	0	0	NA		Leucine-rich repeat-containing N-terminal, type 2;Leucine-rich repeat, typical subtype;Leucine-rich repeat	AT1G17240.1	AtRLP2,RLP2	receptor like protein 2	LOC_Os02g05930.1	phytosulfokine receptor precursor, putative, expressed	Zm00001d015298_T001; Zm00001d053867_T001	GRMZM2G104425_T01; GRMZM2G451007_T01	Bradi3g04176.1; Bradi3g04227.1	Sobic.004G045700.2	Seita.1G082400.1; Seita.1G082600.1
Sevir.1G082400	0	0	0	0	0	0	0	0	0	0	0	0	NA	tyrosine-sulfated glycopeptide receptor 1-like	Leucine-rich repeat-containing N-terminal, type 2;Leucine-rich repeat, typical subtype;Leucine-rich repeat	AT1G17240.1	AtRLP2,RLP2	receptor like protein 2	LOC_Os02g06190.1	phytosulfokine receptor precursor, putative, expressed	NA	NA	Bradi3g04187.1; Bradi3g04227.1	Sobic.004G045200.1; Sobic.004G045000.1	Seita.1G084200.1; Seita.1G084500.1
Sevir.1G082600	0	0	0	0	0	0	0	0	0	0	0	0	NA	receptor-like protein 2-like	Leucine-rich repeat-containing N-terminal, type 2;Leucine-rich repeat, typical subtype;Leucine-rich repeat	AT1G72300.1		Leucine-rich receptor-like protein kinase family protein	LOC_Os02g06070.1	phytosulfokine receptor precursor, putative, expressed	NA	NA	NA	Sobic.004G045100.1	Seita.1G084400.1; Seita.1G084100.1
Sevir.1G084400	0	0	0	0	0	0	0	0	0	0	0	0	NA	receptor-like protein 2-like	Leucine-rich repeat-containing N-terminal, type 2;Leucine-rich repeat, typical subtype;Leucine-rich repeat	AT1G17240.1	AtRLP2,RLP2	receptor like protein 2	LOC_Os02g05950.1	phytosulfokine receptor precursor, putative, expressed	NA	GRMZM2G410963_T01	Bradi3g04217.2; Bradi3g04210.2	Sobic.004G044500.1; Sobic.004G045100.1	Seita.1G086400.1; Seita.1G082300.1
Sevir.1G122900	0	0	0	0	0	0	0	0	0	0	0	0	NA	probable LRR receptor-like serine/threonine-protein kinase At4g08850-like	Leucine-rich repeat-containing N-terminal, type 2;Leucine-rich repeat, typical subtype;Leucine-rich repeat	AT4G08850.1		Leucine-rich repeat receptor-like protein kinase family protein	LOC_Os10g33040.1	receptor-like protein kinase precursor, putative, expressed	NA	NA	Bradi2g37621.2	Sobic.003G413201.1; Sobic.004G126100.2	Seita.8G186800.1; Seita.1G124200.1
Sevir.1G210700	0	0	0	0	0	0	0	0	0	0	0	0	NA	leucine-rich repeat receptor-like serine/threonine/tyrosine-protein kinase SOBIR1-like	Protein kinase-like domain;Serine/threonine-protein kinase, active site;Serine/threonine- / dual specificity protein kinase, catalytic domain;Protein kinase, catalytic domain	AT2G31880.1	EVR,SOBIR1	Leucine-rich repeat protein kinase family protein	LOC_Os06g18000.1	protein kinase domain containing protein, expressed	Zm00001d045785_T001; Zm00001d045397_T001	GRMZM2G027958_T01; GRMZM2G433433_T01	NA	Sobic.010G120800.1	Seita.1G207200.1; Seita.4G126800.1
Sevir.1G236700	0	0	0	0	0	0	0	0	0	0	0	0	NA		Leucine-rich repeat-containing N-terminal, type 2;Protein kinase-like domain;Serine/threonine-protein kinase, active site;Protein kinase, catalytic domain	AT3G47570.1		Leucine-rich repeat protein kinase family protein	LOC_Os02g40200.1	receptor-like protein kinase precursor, putative, expressed	NA	NA	NA	Sobic.004G217500.1	Seita.1G233100.1
Sevir.1G237300	0	0	0	0	0	0	0	0	0	0	0	0	NA		Leucine-rich repeat-containing N-terminal, type 2;Leucine-rich repeat, typical subtype;Leucine-rich repeat	AT3G47090.1		Leucine-rich repeat protein kinase family protein	LOC_Os02g40240.2	receptor kinase, putative, expressed	NA	NA	Bradi3g48790.1	NA	Seita.1G232700.1; Seita.1G233300.1
Sevir.2G083300	0	0	0	0	0	0	0	0	0	0	0	0	NA	L-type lectin-domain containing receptor kinase IV.1-like	Protein kinase, ATP binding site;Protein kinase-like domain;Serine/threonine-protein kinase, active site;Serine/threonine- / dual specificity protein kinase, catalytic domain;Legume lectin domain;Protein kinase, catalytic domain;Concanavalin A-like lectin/glucanase, subgroup	AT2G37710.1	RLK	receptor lectin kinase	LOC_Os07g03830.1	lectin-like receptor kinase, putative, expressed	NA	NA	NA	NA	Seita.2G080700.1
Sevir.2G207800	0	0	0	0	0	0	0	0	0	0	0	0	NA		Leucine-rich repeat-containing N-terminal, type 2;Leucine-rich repeat	AT1G48480.1	RKL1	receptor-like kinase 1	LOC_Os09g23570.1	inactive receptor kinase At2g26730 precursor, putative, expressed	Zm00001d020403_T001	GRMZM2G153527_T01	NA	Sobic.002G195800.3	Seita.2G199500.1
Sevir.2G442600	0	0	0	0	0	0	0	0	0	0	0	0	NA	probably inactive leucine-rich repeat receptor-like protein kinase At5g06940-like	Protein kinase, ATP binding site;Leucine-rich repeat-containing N-terminal, type 2;Protein kinase-like domain;Serine/threonine-protein kinase, active site;Leucine-rich repeat, typical subtype;Serine/threonine- / dual specificity protein kinase, catalytic domain;Leucine-rich repeat;Protein kinase, catalytic domain	AT5G06940.1		Leucine-rich repeat receptor-like protein kinase family protein	LOC_Os04g39650.1	receptor protein kinase CLAVATA1 precursor, putative, expressed	Zm00001d025674_T001; Zm00001d042320_T001	GRMZM2G123178_T01; GRMZM2G066248_T01	NA	Sobic.006G116200.1	Seita.7G134000.1; Seita.9G315800.1
Sevir.3G176800	0	0	0	0	0	0	0	0	0	0	0	0	NA			AT4G29990.1		Leucine-rich repeat transmembrane protein kinase protein	LOC_Os05g44930.1	receptor-like protein kinase, putative, expressed	Zm00001d038484_T001; Zm00001d038485_T001	AC214817.3_FGT007; GRMZM2G701201_T02	Bradi2g19297.2; Bradi2g38948.1	Sobic.009G204900.1; Sobic.009G204300.1	Seita.3G172500.1; Seita.3G172300.1
Sevir.3G177000	0	0	0	0	0	0	0	0	0	0	0	0	NA		Malectin-like carbohydrate-binding domain;Concanavalin A-like lectin/glucanase, subgroup	AT2G19210.1		Leucine-rich repeat transmembrane protein kinase protein	LOC_Os05g44930.1	receptor-like protein kinase, putative, expressed	NA	NA	Bradi2g19290.1	Sobic.009G204300.1; Sobic.009G204900.1	Seita.3G172700.1; Seita.3G172800.1
Sevir.3G177100	0	0	0	0	0	0	0	0	0	0	0	0	NA			AT4G29990.1		Leucine-rich repeat transmembrane protein kinase protein	LOC_Os05g44930.1	receptor-like protein kinase, putative, expressed	NA	NA	Bradi2g38910.1; Bradi2g19290.1	Sobic.009G204300.1; Sobic.009G204900.1	Seita.3G172800.1; Seita.3G172200.1
Sevir.3G344700	0	0	0	0	0	0	0	0	0	0	0	0	NA			AT4G29990.1		Leucine-rich repeat transmembrane protein kinase protein	LOC_Os12g37980.1	protein kinase domain containing protein, expressed	Zm00001d041574_T001; Zm00001d041573_T001	GRMZM2G332280_T01	Bradi4g04109.1; Bradi4g04126.1	Sobic.008G134500.1; Sobic.008G134300.1	Seita.3G330900.1; Seita.3G331000.1
Sevir.3G353200	0	0	0	0	0	0	0	0	0	0	0	0	NA			AT4G29990.1		Leucine-rich repeat transmembrane protein kinase protein	LOC_Os12g37980.1	protein kinase domain containing protein, expressed	Zm00001d041574_T001	GRMZM2G332280_T01	Bradi4g04077.1	Sobic.008G134300.1; Sobic.008G134500.1	Seita.3G338700.1; Seita.3G330900.1
Sevir.3G357500	0	0	0	0	0	0	0	0	0	0	0	0	NA		Leucine-rich repeat-containing N-terminal, type 2	AT2G15880.1		Leucine-rich repeat (LRR) family protein	LOC_Os12g35710.1	uncharacterized protein At4g06744 precursor, putative, expressed	Zm00001d023858_T018; Zm00001d023858_T036	GRMZM2G300969_T01; GRMZM5G805485_T01	Bradi4g05479.1; Bradi4g11127.1	Sobic.008G119501.1; Sobic.005G204500.1	Seita.3G342300.1; Seita.8G220300.1
Sevir.4G044400	0	0	0	0	0	0	0	0	0	0	0	0	NA	putative leucine-rich repeat receptor-like serine/threonine-protein kinase At2g24130-like	Protein kinase, ATP binding site;Leucine-rich repeat-containing N-terminal, type 2;Protein kinase-like domain;Serine/threonine-protein kinase, active site;Leucine-rich repeat, typical subtype;Serine/threonine- / dual specificity protein kinase, catalytic domain;Leucine-rich repeat;Protein kinase, catalytic domain;Concanavalin A-like lectin/glucanase, subgroup	AT2G24130.1		Leucine-rich receptor-like protein kinase family protein	LOC_Os06g08690.1	leucine-rich repeat receptor protein kinase EXS precursor, putative, expressed	Zm00001d045088_T001; Zm00001d045086_T001	GRMZM2G127990_T01; GRMZM2G428370_T01	Bradi1g47130.1; Bradi1g47107.1	Sobic.010G067300.1; Sobic.010G067400.1	Seita.4G046500.1; Seita.4G046400.1
Sevir.4G235200	0	0	0	0	0	0	0	0	0	0	0	0	NA	receptor-like protein kinase HSL1-like	Protein kinase, ATP binding site;Leucine-rich repeat-containing N-terminal, type 2;Protein kinase-like domain;Serine/threonine-protein kinase, active site;Leucine-rich repeat, typical subtype;Serine/threonine- / dual specificity protein kinase, catalytic domain;Leucine-rich repeat;Serine-threonine/tyrosine-protein kinase catalytic domain;Protein kinase, catalytic domain	AT5G25930.1		Protein kinase family protein with leucine-rich repeat domain	LOC_Os05g44770.1	receptor-like protein kinase 5 precursor, putative, expressed	NA	NA	NA	NA	Seita.5G313500.1; Seita.5G206400.1
Sevir.4G245400	0	0	0	0	0	0	0	0	0	0	0	0	NA	systemin receptor SR160-like	Leucine-rich repeat-containing N-terminal, type 2;Leucine-rich repeat, typical subtype;Leucine-rich repeat	AT2G34930.1		disease resistance family protein / LRR family protein	LOC_Os11g36020.1	leucine rich repeat protein, putative, expressed	NA	NA	NA	NA	Seita.4G233400.1
Sevir.4G245500	0	0	0	0	0	0	0	0	0	0	0	0	NA	systemin receptor SR160-like	Leucine-rich repeat-containing N-terminal, type 2;Leucine-rich repeat, typical subtype;Leucine-rich repeat	AT2G34930.1		disease resistance family protein / LRR family protein	LOC_Os11g35980.1	leucine rich repeat protein, putative, expressed	NA	NA	Bradi3g51110.1	Sobic.010G174550.1; Sobic.003G210500.1	Seita.4G233400.1
Sevir.5G102800	0	0	0	0	0	0	0	0	0	0	0	0	NA		Protein kinase, ATP binding site;Leucine-rich repeat-containing N-terminal, type 2;Protein kinase-like domain;Serine/threonine-protein kinase, active site;Leucine-rich repeat, typical subtype;Serine/threonine- / dual specificity protein kinase, catalytic domain;Leucine-rich repeat;Protein kinase, catalytic domain;Concanavalin A-like lectin/glucanase, subgroup	AT3G47570.1		Leucine-rich repeat protein kinase family protein	LOC_Os01g05870.1	receptor kinase, putative, expressed	Zm00001d039822_T001	GRMZM2G463574_T01	NA	Sobic.003G069700.2; Sobic.003G067600.1	Seita.5G105100.1; Seita.5G105600.1
Sevir.5G259300	0	0	0	0	0	0	0	0	0	0	0	0	NA	putative receptor-like protein kinase At3g47110-like	Protein kinase, ATP binding site;Leucine-rich repeat-containing N-terminal, type 2;Protein kinase-like domain;Serine/threonine-protein kinase, active site;Leucine-rich repeat, typical subtype;Serine/threonine- / dual specificity protein kinase, catalytic domain;Leucine-rich repeat;Protein kinase, catalytic domain;Concanavalin A-like lectin/glucanase, subgroup	AT3G47570.1		Leucine-rich repeat protein kinase family protein	LOC_Os02g12400.1	receptor-like protein kinase precursor, putative, expressed	NA	NA	NA	NA	Seita.1G036800.1
Sevir.5G415500	0	0	0	0	0	0	0	0	0	0	0	0	NA		Leucine-rich repeat-containing N-terminal, type 2	AT5G48380.1	BIR1	BAK1-interacting receptor-like kinase 1	LOC_Os01g66820.1	inactive receptor kinase At1g27190 precursor, putative, expressed	NA	NA	NA	NA	Seita.5G410000.1; Seita.5G410100.1
Sevir.5G415800	0	0	0	0	0	0	0	0	0	0	0	0	NA	probably inactive leucine-rich repeat receptor-like protein kinase At5g48380-like	Leucine-rich repeat	AT5G48380.1	BIR1	BAK1-interacting receptor-like kinase 1	LOC_Os01g66820.1	inactive receptor kinase At1g27190 precursor, putative, expressed	NA	NA	NA	NA	Seita.5G410300.1; Seita.6G000200.1
Sevir.6G000300	0	0	0	0	0	0	0	0	0	0	0	0	NA	probably inactive leucine-rich repeat receptor-like protein kinase At5g48380-like	Leucine-rich repeat	AT5G48380.1	BIR1	BAK1-interacting receptor-like kinase 1	LOC_Os01g66820.1	inactive receptor kinase At1g27190 precursor, putative, expressed	NA	NA	NA	NA	Seita.6G000200.1; Seita.5G410200.1
Sevir.6G070800	0	0	0	0	0	0	0	0	0	0	0	0	NA		Leucine-rich repeat, typical subtype;Leucine-rich repeat	AT5G46330.1	FLS2	Leucine-rich receptor-like protein kinase family protein	LOC_Os01g04070.1	verticillium wilt disease resistance protein, putative, expressed	NA	NA	NA	NA	Seita.6G071500.1; Seita.6G071700.1
Sevir.6G071300	0	0	0	0	0	0	0	0	0.01	0	0	0	NA	probable LRR receptor-like serine/threonine-protein kinase At4g36180-like	Leucine-rich repeat, typical subtype;Leucine-rich repeat	AT2G33060.1	AtRLP27,RLP27	receptor like protein 27	LOC_Os01g04070.1	verticillium wilt disease resistance protein, putative, expressed	Zm00001d024693_T001	NA	NA	Sobic.007G033100.2; Sobic.007G032600.1	Seita.6G072100.1; Seita.6G071500.1
Sevir.6G172600	0	0	0	0	0	0	0	0	0	0	0	0	NA	receptor-like protein kinase-like	Leucine-rich repeat-containing N-terminal, type 2;Leucine-rich repeat, typical subtype;Leucine-rich repeat	AT1G73066.1		Leucine-rich repeat family protein	LOC_Os08g34640.1	receptor-like protein kinase precursor, putative, expressed	Zm00001d050074_T003; Zm00001d050074_T001	GRMZM2G011806_T01; GRMZM2G428554_T01	NA	Sobic.007G144600.1; Sobic.007G144700.2	Seita.6G166900.1; Seita.6G167000.1
Sevir.6G172800	0	0	0	0	0	0	0	0	0	0	0	0	NA	receptor-like protein kinase-like	Protein kinase, ATP binding site;Leucine-rich repeat-containing N-terminal, type 2;Protein kinase-like domain;Serine/threonine-protein kinase, active site;Leucine-rich repeat, typical subtype;Serine/threonine- / dual specificity protein kinase, catalytic domain;Protein kinase, catalytic domain;Concanavalin A-like lectin/glucanase, subgroup	AT1G73080.1	ATPEPR1,PEPR1	PEP1 receptor 1	LOC_Os08g34650.2	receptor-like protein kinase precursor, putative, expressed	Zm00001d050074_T003; Zm00001d050074_T001	GRMZM2G011806_T01; GRMZM2G431114_T01	Bradi3g37210.1	Sobic.007G144600.1	Seita.6G166800.1; Seita.6G166900.1
Sevir.7G001300	0	0	0	0	0	0	0	0	0	0	0	0	NA	NA	NA	AT3G24240.1		Leucine-rich repeat receptor-like protein kinase family protein	LOC_Os10g33040.1	receptor-like protein kinase precursor, putative, expressed	NA	NA	NA	NA	Seita.7G018500.1
Sevir.8G049600	0	0	0	0	0	0	0	0	0	0	0	0	NA		Protein kinase, ATP binding site;Protein kinase-like domain;Serine/threonine-protein kinase, active site;Leucine-rich repeat, typical subtype;Serine/threonine- / dual specificity protein kinase, catalytic domain;Leucine-rich repeat;Protein kinase, catalytic domain;Concanavalin A-like lectin/glucanase, subgroup	AT3G47570.1		Leucine-rich repeat protein kinase family protein	LOC_Os01g12790.1	receptor protein kinase, putative, expressed	NA	GRMZM2G406974_T01	NA	Sobic.005G220800.1; Sobic.008G065200.3	Seita.8G049600.1; Seita.8G049800.1
Sevir.8G052500	0	0	0	0	0	0	0	0	0	0	0	0	NA		Leucine-rich repeat-containing N-terminal, type 2;Protein kinase-like domain;Serine/threonine-protein kinase, active site;Leucine-rich repeat, typical subtype;Serine/threonine- / dual specificity protein kinase, catalytic domain;Leucine-rich repeat;Protein kinase, catalytic domain	AT3G47570.1		Leucine-rich repeat protein kinase family protein	LOC_Os11g07120.2	receptor kinase-like protein, identical, putative, expressed	NA	NA	NA	Sobic.002G075100.1	Seita.8G051700.1
Sevir.8G052700	0	0	0	0	0	0	0	0	0	0	0	0	NA		Leucine-rich repeat-containing N-terminal, type 2;Protein kinase-like domain;Serine/threonine-protein kinase, active site;Leucine-rich repeat, typical subtype;Serine/threonine- / dual specificity protein kinase, catalytic domain;Leucine-rich repeat;Protein kinase, catalytic domain	AT5G44700.1	EDA23,GSO2	Leucine-rich repeat transmembrane protein kinase	LOC_Os11g07120.1	receptor kinase-like protein, identical, putative, expressed	NA	NA	Bradi4g24410.3; Bradi4g24457.1	Sobic.005G057700.1; Sobic.005G065000.1	Seita.8G051900.1
Sevir.8G056500	0	0	0	0	0	0	0	0	0	0	0	0	NA	probable leucine-rich repeat receptor-like protein kinase At5g63930-like	Leucine-rich repeat-containing N-terminal, type 2;Leucine-rich repeat, typical subtype;Leucine-rich repeat	AT2G34930.1		disease resistance family protein / LRR family protein	LOC_Os01g41770.1	leucine rich repeat protein, putative, expressed	NA	NA	NA	Sobic.005G060900.2	Seita.8G055500.1; Seita.8G055600.1
Sevir.8G140500	0	0	0	0	0	0	0	0	0	0	0	0	NA			AT1G71830.1	ATSERK1,SERK1	somatic embryogenesis receptor-like kinase 1	LOC_Os11g31530.1	BRASSINOSTEROID INSENSITIVE 1-associated receptor kinase 1 precursor, putative, expressed	NA	NA	NA	Sobic.005G126100.1; Sobic.005G125950.1	Seita.8G131800.1; Seita.8G131900.1
Sevir.8G166200	0	0	0	0	0	0	0	0	0	0	0	0	NA		Leucine-rich repeat-containing N-terminal, type 2;Leucine-rich repeat, typical subtype;Leucine-rich repeat	AT2G34930.1		disease resistance family protein / LRR family protein	LOC_Os11g35450.1	leucine-rich repeat receptor protein kinase EXS precursor, putative, expressed	NA	NA	NA	Sobic.010G130700.1	Seita.8G154300.1
Sevir.8G167900	0	0	0	0	0	0	0	0	0	0	0	0	NA	probable LRR receptor-like serine/threonine-protein kinase At3g47570-like	Protein kinase, ATP binding site;Leucine-rich repeat-containing N-terminal, type 2;Protein kinase-like domain;Serine/threonine-protein kinase, active site;Leucine-rich repeat, typical subtype;Serine/threonine- / dual specificity protein kinase, catalytic domain;Leucine-rich repeat;Serine-threonine/tyrosine-protein kinase catalytic domain;Protein kinase, catalytic domain;Concanavalin A-like lectin…	AT3G47570.1		Leucine-rich repeat protein kinase family protein	LOC_Os04g13640.1	protein kinase domain containing protein, expressed	NA	GRMZM2G406974_T01	Bradi4g10998.1	Sobic.008G007400.1; Sobic.008G065200.3	Seita.8G157700.1; Seita.8G050400.1
Sevir.8G188800	0	0	0	0	0	0	0	0	0	0	0	0	NA		Protein kinase, ATP binding site;Protein kinase-like domain;Serine/threonine-protein kinase, active site;Leucine-rich repeat, typical subtype;Serine/threonine- / dual specificity protein kinase, catalytic domain;Leucine-rich repeat;Protein kinase, catalytic domain;Concanavalin A-like lectin/glucanase, subgroup	AT3G47570.1		Leucine-rich repeat protein kinase family protein	LOC_Os01g12790.1	receptor protein kinase, putative, expressed	Zm00001d030787_T001	GRMZM2G088490_T01	NA	Sobic.005G220800.1	Seita.8G179900.1; Seita.8G049600.1
Sevir.8G195700	0	0	0	0	0	0	0	0	0	0	0	0	NA	NA	NA	AT4G08850.1		Leucine-rich repeat receptor-like protein kinase family protein	LOC_Os01g33110.1	receptor-like protein kinase 5 precursor, putative, expressed	NA	NA	Bradi2g37621.2	Sobic.004G126100.2	Seita.8G186800.1; Seita.1G124200.1
Sevir.9G129400	0	0	0	0	0	0	0	0	0	0	0	0	NA		Leucine-rich repeat, typical subtype;Leucine-rich repeat	AT2G01820.1		Leucine-rich repeat protein kinase family protein	LOC_Os03g48890.1	LRR receptor kinase, putative, expressed	NA	NA	NA	NA	Seita.9G130400.1
Sevir.9G300300	0	0	0	0	0	0	0	0	0	0	0	0	NA		Leucine-rich repeat-containing N-terminal, type 2;Protein kinase-like domain;Tyrosine-protein kinase, active site;Leucine-rich repeat, typical subtype;Leucine-rich repeat;Protein kinase, catalytic domain;Concanavalin A-like lectin/glucanase, subgroup	AT4G08850.1		Leucine-rich repeat receptor-like protein kinase family protein	LOC_Os02g34790.1	receptor-like protein kinase 5 precursor, putative, expressed	NA	NA	NA	NA	Seita.9G294500.1

## Sheet: WOX
Table S3, sheet 4: Expression of WUS/WOX genes in Transcripts per Million (TPM) at six different stages of inflorescence development. For annotation, WikiGene.description and InterPro.description are from Biomart of EnsemblPlants. Best.hit.arabi.name, arabi.symbol, arabi.defline, Best.hit.rice.name and rice.defline are from the annotation file for the S. viridis genome (v1.1) from Phytozome v12.1…
	Mean expression value (TPM) at different stages of inflorescence development						Standard deviation of expression value (TPM) at different stages of inflorescence development								Gene annotation							Homologs in grasses
Gene	10DAS	12DAS	14DAS	15DAS	16DAS	18DAS	10DAS_SD	12DAS_SD	14DAS_SD	15DAS_SD	16DAS_SD	18DAS_SD	homolog of	Short_description	WikiGene.description	InterPro.description	Best.hit.arabi.name	arabi.symbol	arabi.defline	Best.hit.rice.name	rice.defline	Maizev4.gene	Zmays_284.gene	Bradi.gene	Sobic.gene	Seita.gene
Sevir.3G044600	7.26	17.06	29.44	14.09	19.82	43.81	0.55	2.55	2.03	2.94	4.07	3.78	WOX3	NA	putative WUSCHEL-related homeobox 2-like	Homeodomain-like;Homeobox domain	AT2G28610.1	PRS,PRS1,WOX3	Homeodomain-like superfamily protein	LOC_Os05g02730.1	homeobox domain containing protein, expressed	Zm00001d035535_T001; Zm00001d010998_T001	GRMZM2G122537_T02; GRMZM2G140083_T01	Bradi2g37650.1; Bradi4g45325.1	Sobic.009G023900.1; Sobic.005G042200.1	Seita.3G043800.1; Seita.7G334400.1
Sevir.5G365700	15.49	13.5	16.71	15.88	18.37	17.05	3.29	0.85	1.45	4.35	1.82	1.6	WOX13	NA	WUSCHEL-related homeobox 8-like	Homeodomain-like;Homeobox domain	AT4G35550.1; AT4G35550.1	ATWOX13,HB-4,WOX13; ATWOX13,HB-4,WOX13	WUSCHEL related homeobox 13; WUSCHEL related homeobox 13	LOC_Os01g60270.2; LOC_Os01g60270.1	homeobox domain containing protein, expressed; homeobox domain containing protein, expressed	Zm00001d043076_T001; Zm00001d043076_T002	GRMZM2G069274_T01; GRMZM2G038252_T02	Bradi2g53390.3; Bradi1g69185.2	Sobic.003G336600.1	Seita.5G360500.1
Sevir.5G266300	0.87	4.36	6.25	3.92	4.57	3.6	0.12	0.81	0.72	0.73	1.38	0.59	WOX9	NA	WUSCHEL-related homeobox 7-like	Homeodomain-like;Homeobox domain	AT2G33880.1	HB-3,STIP,WOX9	homeobox-3	LOC_Os01g47710.1	homeobox domain containing protein, expressed	Zm00001d043937_T001; Zm00001d039017_T001	GRMZM2G031882_T02; GRMZM2G133972_T01	Bradi2g46055.1; Bradi2g16444.1	Sobic.003G250100.2; Sobic.009G233000.1	Seita.5G263100.1; Seita.3G145800.1
Sevir.8G020500	2.79	2.54	1.49	2.07	3.43	5.68	0.98	0.3	0.44	0.67	0.82	0.89	WOX3/NS1	NARROW SHEATH1	WUSCHEL-related homeobox 3A-like	Homeodomain-like;Homeobox domain	AT2G28610.1	PRS,PRS1,WOX3	Homeodomain-like superfamily protein	LOC_Os05g02730.1	homeobox domain containing protein, expressed	Zm00001d004889_T001; Zm00001d052598_T001	GRMZM2G069028_T01; GRMZM2G122537_T02	Bradi4g45325.1; Bradi2g37650.1	Sobic.005G042200.1; Sobic.009G023900.1	Seita.8G001300.1; Seita.7G334400.1
Sevir.3G148100	0.68	3.28	4.69	2.31	2.3	2.78	0.21	0.95	0.89	0.77	0.75	0.69	WOX9	NA	WUSCHEL-related homeobox 12-like	Homeodomain-like;Homeobox domain	AT2G33880.1	HB-3,STIP,WOX9	homeobox-3	LOC_Os05g48990.1	homeobox domain containing protein, expressed	Zm00001d039017_T001; Zm00001d024410_T001	GRMZM2G409881_T01; GRMZM2G031882_T02	Bradi2g46055.1; Bradi2g16444.1	Sobic.009G233000.1; Sobic.003G250100.2	Seita.3G145800.1; Seita.5G263100.1
Sevir.3G028500	0.47	2.66	3.94	1.26	1.73	1.03	0.25	1.07	1.27	0.75	0.25	0.5	WUS	WUSCHEL	WUSCHEL-related homeobox 1B-like	Homeodomain-like;Homeobox domain	AT2G17950.1	PGA6,WUS,WUS1	Homeodomain-like superfamily protein	LOC_Os04g56780.1	homeobox domain containing protein, expressed	Zm00001d026537_T001; Zm00001d001948_T001	GRMZM2G028622_T01; GRMZM2G047448_T01	Bradi5g25113.1; Bradi5g24080.1	Sobic.006G254900.1; Sobic.009G023900.1	Seita.3G027800.1; Seita.3G043800.1
Sevir.7G274600	1.74	0.53	0.63	1.6	2.76	2.64	0.99	0.08	0.15	0.09	0.22	0.45	WOX4	NA	WUSCHEL-related homeobox 4-like	Homeodomain-like;Homeobox domain	AT1G46480.1	WOX4	WUSCHEL related homeobox 4	LOC_Os04g55590.1	homeobox domain containing protein, expressed	Zm00001d026453_T001; Zm00001d035535_T001	GRMZM6G260565_T01; GRMZM2G122537_T02	Bradi5g24080.1; Bradi2g37650.1	Sobic.006G241000.1; Sobic.009G023900.1	Seita.7G263200.1; Seita.3G043800.1
Sevir.2G449200	0.7	0.2	0.26	0.19	0.17	0.22	0.57	0.09	0.2	0.22	0.08	0.13	WOX11	NA	WUSCHEL-related homeobox 11-like	Homeodomain-like;Homeobox domain	AT3G03660.1	WOX11	WUSCHEL related homeobox 11	LOC_Os07g48560.1	homeobox domain containing protein, expressed	Zm00001d022524_T001; Zm00001d047559_T001	GRMZM2G162481_T02; GRMZM2G314064_T01	Bradi1g63680.2; Bradi1g17420.1	Sobic.002G421800.2; Sobic.001G386600.1	Seita.2G436700.1; Seita.9G418900.1
Sevir.5G391000	0.26	0.12	0.14	0.33	0.22	0.21	0.1	0.06	0.08	0.09	0.19	0.11	WOX5	NA	WUSCHEL-related homeobox 9-like	Homeodomain-like;Homeobox domain	AT3G11260.1	WOX5	WUSCHEL related homeobox 5	LOC_Os01g63510.1	homeobox domain containing protein, expressed	Zm00001d042821_T001; Zm00001d012330_T001	GRMZM2G116063_T01; GRMZM2G478396_T01	Bradi2g55270.1; Bradi2g37650.1	Sobic.003G360200.1; Sobic.006G254900.1	Seita.5G385900.1; Seita.3G027800.1
Sevir.9G422800	0.19	0.12	0.18	0.08	0.16	0.43	0.15	0.12	0.15	0.05	0.04	0.1	WOX11	NA	WUSCHEL-related homeobox 6-like	Homeodomain-like;Homeobox domain	AT3G03660.1	WOX11	WUSCHEL related homeobox 11	LOC_Os03g20910.2	homeobox domain containing protein, expressed	Zm00001d028986_T001; Zm00001d047559_T001	GRMZM2G314064_T01; GRMZM2G162481_T02	Bradi1g63680.2; Bradi1g17420.1	Sobic.001G386600.1; Sobic.002G421800.2	Seita.9G418900.1; Seita.2G436700.1
Sevir.6G090000	0.08	0.07	0.03	0.12	0.02	0.07	0.12	0.08	0.06	0.11	0.04	0.05	WOX12	NA	WUSCHEL-related homeobox 10-like	Homeodomain-like;Homeobox domain	AT5G17810.1	WOX12	WUSCHEL related homeobox 12	LOC_Os08g14400.1	homeobox domain containing protein, expressed	Zm00001d024410_T001; Zm00001d022524_T001	GRMZM2G170958_T01; GRMZM2G314064_T01	Bradi3g18800.1; Bradi1g63680.2	Sobic.007G087600.1; Sobic.002G421800.2	Seita.6G090700.1; Seita.9G418900.1
Sevir.5G381600	0.05	0.02	0.05	0	0.02	0.16	0.04	0.03	0.06	0	0.05	0.05	WOX2	NA	WUSCHEL-related homeobox 5-like	Homeodomain-like;Homeobox domain	AT5G59340.1	WOX2	WUSCHEL related homeobox 2	LOC_Os01g62310.1	homeobox domain containing protein, expressed	Zm00001d042920_T001; Zm00001d042920_T002	GRMZM2G108933_T01; GRMZM2G339751_T01	Bradi5g24080.1; Bradi2g37650.1	Sobic.003G350900.1; Sobic.009G023900.1	Seita.5G376400.1; Seita.3G043800.1
